# Supplementary material
Source: publisher figshare collection journal article supplement (https://gsapubs.figshare.com/ndownloader/files/34869882)
Supplement: Supplementary file 1 [file 34869882]

## Sheet: Table S1
TABLE S1. STANDARDS EMPLOYED FOR ELECTRON MICROPROBE ANALYSES OF OLIVINE, CLINOPYROXENE, PLAGIOCLASE, AND Fe-Ti OXIDES
Standards employed for electron microprobe analyses of olivine
Element (olivine)	Standard name (standard block)	Mineral name of the standard
Mg,Si	FOBO	Bolten forsterite
Fe	FESI	Ferrosilite (synthetic)
Ni	NiOl	Ni-olivine
Al	JADE	JD-1 Jadeite
Mn	BHRH	Rhodonite (Broken Hill)
Cr	Cr2O3	Cr2O3 (Synthetic)
Ca	WOLL	Wollastonite (ANU)
Standards employed for electron microprobe analyses of clinopyroxene
Element (clinopyroxene)	Standard name (standard block)	Mineral name of the standard
Mg	ENST	Enstatite (Harvard, H131709)
Na	JADE	JD-1 Jadeite
Si	GKFS	Adularia (St. Gothard)
Al	JADE	JD-1 Jadeite
Fe	FESI	Ferrosilite (synthetic)
Ni	NiOl	Ni-olivine
Cr	Cr2O3	Cr2O3 (Synthetic)
Mn	BHRH	Rhodonite (Broken Hill)
Ti	GEIK	Geikelite (Synthetic)
Ca	WOLL	Wollastonite (ANU)
Standards employed for electron microprobe analyses of plagioclase
Element (plagioclase)	Standard name (standard block)	Mineral name of the standard
Mg	GEIK	Geikelite (Synthetic)
Na	TAB	Albite (Tiburion)
Si	GKFS	Adularia (St. Gothard)
Al	TANZ	Tanzanite
Ti	GEIK	Geikelite (Synthetic)
Fe	FESI	Ferrosilite (synthetic)
Mn	BHRH	Rhodonite (Broken Hill)
Ca	WOLL	Wollastonite (ANU)
K	GKFS	Adularia (St. Gothard)
Standards employed for electron microprobe analyses of Fe-Ti oxides
Element (Fe-Ti oxides)	Standard name (standard block)	Mineral name of the standard
Mg	GEIK	Geikelite (Synthetic)
Ca,Si	WOLL	Wollastonite (ANU)
Al	TANZ	Tanzanite
Cr	CR2O3	Cr2O3 (Synthetic)
V	V2O5	V2O5 (Synthetic)
Fe	Mag USNM	Magnetite (Minas Gerais, NMNH 114887)
Mn	BHRH	Rhodonite (Broken Hill)
Ti	Ilm USNM	Ilmenite (Ilmen Mountains, NMNH 96189)

## Sheet: Table S2
TABLE S2. ANALYZED TRACE-ELEMENT CONCENTRATIONS FOR ALL CIMA SAMPLES
(ppm)	CC-1	DH-1	Cima-3	Cima-8	Cima-1	Cima-9	Cima-6	Cima-2	Cima-4b	Cima-4a	Cima-5	Cima-7
Sc	24	20	21	19	18	18	18	19	17	17	17	16
Be	2	2	2	2	2	2	2	2	2	2	2	2
V	265	235	240	212	219	203	202	214	206	212	204	199
Ba	431	433	360	364	366	362	371	371	378	375	365	372
Sr	687	745	551	530	650	546	613	600	594	599	598	617
Y	24	27	27	26	28	26	28	27	25	27	27	28
Zr	247	280	269	275	284	282	290	281	268	277	267	286
Cr	250	170	170	140	100	140	130	110	110	100	90	70
Co	107	78	79	69	82	68	77	70	88	64	70	72
Ni	190	150	80	80	70	70	80	80	70	50	60	40
Cu	50	60	40	40	30	40	40	30	30	30	30	30
Zn	80	100	100	100	90	90	90	80	90	90	80	80
Ga	20	22	22	22	21	22	21	21	22	21	21	22
Ge	1	1	1	1	1	1	1	1	1	1	1	1
As	bd	bd	bd	bd	bd	bd	bd	bd	bd	bd	bd	bd
Rb	45	55	44	41	43	42	41	38	40	40	40	40
Nb	66	70	51	47	53	48	53	50	49	50	50	54
Mo	4	5	3	3	3	2	3	2	2	2	2	2
Ag	0.6	1	0.9	1.1	0.9	1	1.1	1	1	1	0.9	1
In	bd	bd	bd	bd	bd	bd	bd	bd	bd	bd	bd	bd
Sn	2	2	2	2	2	2	2	2	3	2	3	3
Sb	bd	bd	bd	bd	bd	bd	bd	bd	bd	bd	bd	bd
Cs	0.5	0.6	0.5	bd	0.5	bd	0.7	bd	bd	bd	bd	bd
La	43	50.6	37.1	35.8	39.8	36.5	39.7	37.7	37.6	38.1	38	36.5
Ce	83.5	99.3	74.4	71.8	80.7	71.7	80.8	77.3	75.1	76.6	75.4	72.8
Pr	9.29	11.5	8.92	8.73	9.61	8.41	9.51	9.39	8.86	8.97	9.07	8.64
Nd	37.8	44.1	35.2	34.4	38.7	33.5	38.5	37	36.3	35.8	36	35.4
Sm	7.6	8.8	7.6	7.3	8.1	7.3	7.9	8.1	7.8	7.6	7.7	7.9
Eu	2.4	2.7	2.46	2.49	2.59	2.3	2.59	2.56	2.42	2.46	2.56	2.6
Gd	6.4	7.4	6.9	6.8	7.3	6.7	7.4	7.1	7	7.3	7	7.1
Tb	0.9	1.1	1.1	1.1	1.1	1	1.1	1.1	1.1	1.1	1.1	1.1
Dy	5.5	6.1	6	6.1	6.2	5.8	6.2	6	6	6.1	6	6.2
Ho	1	1.1	1.1	1.1	1.2	1.1	1.1	1.1	1.1	1.1	1.1	1.2
Er	2.5	3.2	3	3	3.1	2.9	3.2	3	3	3.1	3	3.2
Tm	0.36	0.41	0.41	0.43	0.4	0.4	0.44	0.41	0.4	0.42	0.4	0.45
Yb	2.2	2.6	2.6	2.7	2.7	2.5	2.7	2.5	2.6	2.6	2.6	2.8
Lu	0.37	0.4	0.39	0.42	0.41	0.41	0.42	0.41	0.41	0.4	0.4	0.42
Hf	5.9	6.6	6.5	6.6	6.7	6.7	7	6.5	6.3	6.6	6.4	6.9
Ta	4.5	5.7	4.4	4.2	4.6	4.2	4.6	4.3	4.3	4.3	4.3	4.3
W	553	243	254	204	336	231	310	236	382	227	244	245
Tl	bd	bd	bd	bd	bd	bd	bd	bd	bd	bd	bd	bd
Pb	bd	bd	bd	8	bd	bd	bd	bd	5	bd	bd	bd
Bi	bd	bd	bd	bd	bd	bd	bd	bd	bd	bd	bd	bd
Th	5.6	6.4	4.6	4.4	4.4	4.5	4.6	4.2	4.3	4.4	4.3	4.3
U	1.7	2	1.4	1.4	1.5	1.3	1.5	1.3	1.1	1.3	1.3	1.3
Trace-element compositions were determined using inductively coupled plasma mass spectrometry (ICP-MS) at Activation Laboratories, Ontario, Canada.
b.d. below detection limit.

## Sheet: Table S3
TABLE S3. OLIVINE PHENOCRYST ANALYSES FOR ALL CIMA AND DISH HILL SAMPLES.
Probe Session:	2019-02-23											Probe Session:	2019-07-28											Probe Session:	2019-05-22											Probe Session:	2019-07-28											Probe Session:	2019-08-06
Accelerating potential	20 kV											Accelerating potential	20 kV											Accelerating potential	20 kV											Accelerating potential	20 kV											Accelerating potential	20 kV
Beam current	40 nA											Beam current	40 nA											Beam current	40 nA											Beam current	40 nA											Beam current	40 nA
Comment	MgO	Al2O3	SiO2	CaO	Cr2O3	MnO	FeO	NiO	Total	Fo mol%		Comment	MgO	Al2O3	SiO2	CaO	Cr2O3	MnO	FeO	NiO	Total	Fo mol%		Comment	MgO	Al2O3	SiO2	CaO	Cr2O3	MnO	FeO	NiO	Total	Fo mol%		Comment	MgO	Al2O3	SiO2	CaO	Cr2O3	MnO	FeO	NiO	Total	Fo mol%		Comment	MgO
Cima1_ol1	39.096	0.029	39.0688	0.2919	0.0072	0.3904	20.4651	0.119	99.4674	77.3007		Cima2_ol2	31.7632	0.0631	37.2227	0.41	0.002	0.6361	30.7063	0.0599	100.863	64.8376		Cima3_ol2	39.461	0.0284	39.0486	0.2596	0.0077	0.308	21.1612	0.1113	100.386	76.8741		Cima4a_ol1	35.8892	0.0272	38.5732	0.3102	-0.0008	0.4012	25.2378	0.0807	100.519	71.7108		Cima4b_ol1	37.2582
Cima1_ol1	38.9877	0.0199	39.1343	0.2861	0.019	0.372	20.6324	0.1146	99.566	77.1084		Cima2_ol2	40.846	0.0182	39.2639	0.2202	0.0146	0.2625	19.7439	0.1495	100.519	78.6678		Cima3_ol2	44.1427	0.0343	39.7939	0.2361	0.0266	0.2369	15.4817	0.1836	100.136	83.5598		Cima4a_ol1	42.1418	0.0342	39.796	0.2319	0.0144	0.2146	17.5157	0.1577	100.106	81.092		Cima4b_ol1	41.5513
Cima1_ol1	39.3926	0.0307	39.5563	0.311	0.0051	0.4377	20.9363	0.1011	100.771	77.0328		Cima2_ol2	43.7868	0.0333	40.2048	0.2156	0.0121	0.2127	16.2481	0.1992	100.913	82.77		Cima3_ol2	44.5023	0.0232	40.2289	0.2447	0.0293	0.2153	15.2309	0.1842	100.659	83.8927		Cima4a_ol1	42.7827	0.0364	40.0641	0.2117	0.0251	0.2234	16.7102	0.17	100.224	82.027		Cima4b_ol1	41.0841
Cima1_ol1	38.9664	0.0256	38.9673	0.3079	0.0125	0.3957	20.75	0.1143	99.5398	76.9982		Cima2_ol2	44.4773	0.0337	40.2975	0.2308	0.0221	0.2246	15.1934	0.2078	100.687	83.9186		Cima3_ol2	44.2919	0.0425	39.9321	0.2396	0.0249	0.2257	15.1361	0.1809	100.074	83.9133		Cima4a_ol1	42.8251	0.0351	39.959	0.2151	0.0127	0.2122	16.6463	0.1718	100.077	82.0982		Cima4b_ol1	40.9914
Cima1_ol1	38.8369	0.0133	39.0292	0.3012	0.0028	0.4326	20.8669	0.1035	99.5865	76.8394		Cima2_ol2	43.7584	0.046	40.2931	0.2319	0.0227	0.2223	16.1973	0.1941	100.966	82.8053		Cima3_ol2	44.004	0.0332	40.094	0.2386	0.0222	0.1867	15.5222	0.1784	100.279	83.4803		Cima4a_ol1	42.9641	0.0441	40.0878	0.2153	0.0226	0.2393	16.7363	0.1749	100.484	82.0665		Cima4b_ol1	40.878
Cima1_ol1	38.5509	0.0226	38.853	0.3206	0.0149	0.4717	20.994	0.0899	99.3178	76.5989		Cima2_ol2	42.8357	0.0449	40.0668	0.2458	0.0054	0.2274	16.9315	0.1982	100.556	81.8506		Cima3_ol2	43.4009	0.0438	39.7586	0.2448	0.0194	0.2227	16.4489	0.1499	100.289	82.4665		Cima4a_ol1	42.9836	0.0321	39.9941	0.2143	0.0262	0.2187	16.7285	0.1824	100.38	82.0798		Cima4b_ol1	40.7935
Cima1_ol1	38.4141	0.0145	38.8758	0.3242	0.0061	0.5073	21.2756	0.0866	99.5041	76.2953		Cima2_ol3	40.9587	0.0315	39.3608	0.2268	0.011	0.2943	19.4906	0.162	100.536	78.9296		Cima3_ol2	42.6206	0.0447	39.6119	0.2379	0.0236	0.2664	17.4332	0.1246	100.363	81.3364		Cima4a_ol1	42.8836	0.0388	40.2087	0.2112	0.0158	0.2149	16.5715	0.1766	100.321	82.1839		Cima4b_ol1	40.1143
Cima1_ol1	38.3943	0.0273	38.7371	0.3396	-0.002	0.5134	21.4788	0.0813	99.5696	76.1135		Cima2_ol3	44.349	0.0385	40.3637	0.2307	0.0188	0.2222	15.0714	0.2225	100.517	83.9883		Cima3_ol2	41.1072	0.0282	39.2953	0.2542	0.006	0.3041	19.0712	0.1217	100.188	79.3486		Cima4a_ol1	42.9804	0.0389	40.196	0.2197	0.0278	0.2416	16.5965	0.1763	100.477	82.1949		Cima4b_ol1	39.2719
Cima1_ol1	37.8491	0.0238	38.6408	0.3539	0.0069	0.5713	21.6479	0.0659	99.1597	75.7085		Cima2_ol3	45.3924	0.0539	40.7531	0.2412	0.0227	0.1709	13.9218	0.2655	100.822	85.3205		Cima3_ol2	37.151	0.0228	37.9796	0.3625	0.0103	0.3768	23.9035	0.0636	99.8699	73.4783		Cima4a_ol1	42.8692	0.0311	40.1617	0.2246	0.0248	0.2235	16.6846	0.1652	100.385	82.0793		Cima4b_ol1	37.77
Cima1_ol3	42.1312	0.0434	40.4095	0.204	0.0121	0.2588	17.4359	0.1881	100.683	81.1582		Cima2_ol3	45.1819	0.043	40.4896	0.2491	0.0301	0.1827	14.1774	0.2416	100.595	85.0321		Cima3_ol5	38.3158	0.0271	38.2587	0.2994	0.0119	0.3481	22.5774	0.0844	99.9227	75.1564		Cima4a_ol1	38.9305	0.0305	39.1435	0.2349	0.0108	0.3015	21.6861	0.1245	100.462	76.1908		Cima4b_ol1	35.0339
Cima1_ol3	42.0014	0.0301	39.8989	0.2103	0.021	0.2375	17.7059	0.1942	100.299	80.8744		Cima2_ol3	45.0857	0.0377	40.6723	0.2611	0.0258	0.2105	14.2868	0.2608	100.841	84.9065		Cima3_ol5	40.3374	0.0309	38.639	0.2543	0.0081	0.3482	20.1661	0.1108	99.8947	78.0973		Cima4a_ol2	37.1311	1.3093	39.9419	0.3615	0.0131	0.2793	20.7876	0.1174	99.9409	76.1		Cima4b_ol2	38.5386
Cima1_ol3	41.6042	0.0442	40.0126	0.201	0.0223	0.2448	18.2976	0.1757	100.603	80.2104		Cima2_ol3	44.7047	0.038	40.2113	0.2432	0.0189	0.2297	14.7204	0.2414	100.407	84.408		Cima3_ol5	42.4308	0.0288	38.9136	0.2424	0.0173	0.2782	17.2802	0.1249	99.3161	81.4024		Cima4a_ol2	41.4853	0.0292	39.6246	0.2105	0.0195	0.2592	18.1397	0.1425	99.9105	80.3023		Cima4b_ol2	41.6064
Cima1_ol3	41.1282	0.0348	39.8474	0.2069	0.019	0.3232	19.0429	0.1588	100.761	79.3812		Cima2_ol3	41.8197	0.027	39.8638	0.2089	0.01	0.27	18.5626	0.1476	100.91	80.0639		Cima3_ol5	42.6907	0.0351	39.1555	0.254	0.0258	0.2525	17.086	0.1326	99.6322	81.6645		Cima4a_ol2	41.8854	0.036	39.846	0.2136	0.0101	0.1982	18.0981	0.145	100.432	80.4899		Cima4b_ol2	42.0872
Cima1_ol3	40.8646	0.0363	39.6292	0.209	0.0187	0.2705	19.4105	0.1561	100.595	78.9599		Cima2_ol4	34.7979	0.0091	37.9437	0.3145	0.0104	0.5435	26.8869	0.0847	100.591	69.7619		Cima3_ol5	42.5823	0.0203	39.2139	0.2456	0.0079	0.2108	16.849	0.1455	99.2752	81.8349		Cima4a_ol2	41.6856	0.0261	39.8097	0.2147	0.0164	0.2454	18.4462	0.1553	100.599	80.1128		Cima4b_ol2	41.9682
Cima1_ol3	40.3219	0.0304	39.6984	0.2209	0.0173	0.3432	19.7058	0.1369	100.475	78.4831		Cima2_ol4	39.7312	0.0304	39.2405	0.2274	0.0171	0.2845	21.2482	0.1421	100.921	76.9222		Cima3_ol5	42.2625	0.035	39.7224	0.2506	0.0202	0.2621	17.3019	0.1254	99.9801	81.3231		Cima4a_ol2	41.071	0.0227	39.5547	0.2116	0.0105	0.2629	19.1778	0.1459	100.457	79.2427		Cima4b_ol2	42.0245
Cima1_ol3	39.0844	0.0357	39.8542	0.2491	0.0118	0.3368	21.0331	0.1226	100.728	76.8114		Cima2_ol4	41.6221	0.0429	39.5851	0.2375	0.0087	0.2772	18.4239	0.1563	100.354	80.1078		Cima3_ol5	41.1605	0.0384	38.7177	0.2274	0.0319	0.2804	18.947	0.1178	99.5212	79.4765		Cima4a_ol2	39.4523	0.0264	39.2831	0.2063	0.0092	0.3233	20.7709	0.1307	100.202	77.1993		Cima4b_ol2	41.6796
Cima1_ol3	38.4305	0.0317	39.0519	0.2688	0.0047	0.3422	21.771	0.0747	99.9756	75.8841		Cima2_ol4	42.8487	0.0385	39.7093	0.2422	0.0126	0.2355	17.1203	0.1611	100.368	81.6899		Cima3_ol5	39.9884	0.0291	38.4619	0.2631	0.0197	0.3189	20.4769	0.1042	99.6621	77.6843		Cima4a_ol2	37.8491	0.0139	38.9422	0.2058	0.0068	0.3627	23.3015	0.1182	100.8	74.3294		Cima4b_ol2	41.6981
Cima1_ol3	38.5912	0.0174	39.4783	0.2691	-0.0011	0.3661	21.9214	0.1076	100.75	75.8345		Cima2_ol4	42.7446	0.0708	40.2008	0.2714	0.0022	0.2492	17.297	0.1182	100.954	81.4991		Cima3_ol7	42.3713	0.0361	39.2316	0.2466	0.0231	0.2703	17.8074	0.1243	100.111	80.9217		Cima4a_ol2	36.2283	0.0185	38.5329	0.2469	0.0048	0.4216	25.041	0.0964	100.59	72.0591		Cima4b_ol2	40.0662
Cima1_ol3	38.111	0.0111	39.462	0.3197	0.0078	0.504	22.4075	0.076	100.899	75.1974		Cima2_ol4	42.1997	0.0724	39.7868	0.2723	-0.0018	0.2718	17.7494	0.1083	100.459	80.9093		Cima3_ol7	42.0038	0.0235	39.3593	0.2521	0.0101	0.2537	18.2785	0.1331	100.314	80.3782		Cima4a_ol3	39.9507	0.026	39.4076	0.2212	0.0105	0.2679	20.3193	0.1107	100.314	77.8017		Cima4b_ol3	34.0859
Cima1_ol4	41.7119	0.0368	39.9465	0.219	0.0177	0.231	18.4204	0.1507	100.734	80.1452		Cima2_ol4	42.7465	0.0733	40.069	0.2746	-0.0016	0.2403	17.0554	0.1129	100.57	81.7109		Cima3_ol7	41.8433	0.033	39.0873	0.2481	0.0177	0.2791	18.2735	0.1311	99.9131	80.322		Cima4a_ol3	38.4341	0.0258	39.0582	0.2195	-0.0016	0.341	22.3232	0.047	100.447	75.4244		Cima4b_ol3	43.7558
Cima1_ol4	41.069	0.0386	39.6673	0.2237	0.0084	0.2857	18.7533	0.1536	100.199	79.6077		Cima2_ol4	40.5417	0.0447	39.327	0.2363	0.0085	0.3408	20.2539	0.1358	100.889	78.1093		Cima3_ol7	41.6632	0.0344	39.1792	0.2441	0.0127	0.2654	18.4754	0.1236	99.9979	80.079		Cima4a_ol3	38.573	0.036	39.1408	0.2145	-0.0054	0.3176	22.4051	0.0464	100.728	75.4235		Cima4b_ol3	44.9709
Cima1_ol4	41.2558	0.0443	39.8682	0.2445	0.0103	0.2154	18.8768	0.055	100.57	79.5747		Cima2_ol5	45.0289	0.032	40.578	0.2411	0.044	0.1822	14.2358	0.317	100.659	84.9363		Cima3_ol7	39.9755	0.0167	38.8364	0.2533	0.0044	0.3099	20.6864	0.1093	100.192	77.5015		Cima4a_ol3	38.6058	0.0277	39.1865	0.2127	-0.0026	0.289	22.5094	0.0558	100.884	75.353		Cima4b_ol3	45.2169
Cima1_ol4	41.1471	0.033	39.7578	0.2357	0.0182	0.2873	18.8587	0.1599	100.498	79.5474		Cima2_ol5	45.9346	0.0339	40.7444	0.2384	0.0451	0.2073	13.2988	0.3503	100.853	86.0279		Cima3_ol7	40.8061	0.0175	38.9158	0.2434	0.0208	0.2672	19.3191	0.1181	99.7079	79.0145		Cima4a_ol3	37.9642	0.0342	39.0102	0.1913	0.0065	0.341	23.2389	0.0403	100.827	74.4386		Cima4b_ol3	45.1567
Cima1_ol4	40.9186	0.04	39.7925	0.2522	-0.0023	0.2166	19.0686	0.037	100.323	79.2754		Cima2_ol5	46.0673	0.0466	40.8263	0.2425	0.0523	0.1945	13.1089	0.3466	100.885	86.2342		Cima3_ol7	40.4447	0.0527	38.5287	0.2572	0.0136	0.2787	19.4937	0.1073	99.1767	78.7162		Cima4a_ol3	37.7365	0.0302	38.3376	0.2009	0.0048	0.3509	23.0899	0.0331	99.7838	74.4463		Cima4b_ol3	44.6368
Cima1_ol4	40.6068	0.0438	39.6368	0.2512	0.0015	0.2202	19.5297	0.0169	100.307	78.7523		Cima2_ol5	46.2022	0.0423	40.7478	0.2417	0.0409	0.169	13.0062	0.3537	100.804	86.3618		Cima3_ol7	39.8381	0.0191	38.7838	0.2679	0.0068	0.3226	20.6333	0.1009	99.9726	77.4864		Cima4a_ol3	38.0755	0.0293	39.0057	0.2704	-0.0035	0.3103	22.7901	0.0523	100.53	74.8628		Cima4b_ol3	43.7444
Cima1_ol4	40.6805	0.0443	39.6116	0.239	-0.0095	0.224	19.6392	0.0159	100.445	78.689		Cima2_ol5	46.0567	0.0402	40.7343	0.2546	0.0513	0.1813	13.0854	0.3451	100.749	86.2527		Cima3_ol7	38.9337	0.0317	38.7398	0.3003	0.0091	0.3646	21.9993	0.0844	100.463	75.9312		Cima4a_ol3	36.9993	0.0347	38.7635	0.261	0.0102	0.3808	23.9793	0.0953	100.524	73.3366		Cima4b_ol3	42.3428
Cima1_ol4	40.5137	0.0206	39.6064	0.2247	0.0118	0.2923	19.7132	0.1357	100.518	78.5568		Cima2_ol5	46.037	0.0285	40.7953	0.2414	0.0596	0.2237	13.1488	0.3417	100.876	86.1902		Cima3_ol9	37.5043	0.0238	38.3975	0.3229	0.0133	0.4264	23.1741	0.0891	99.9514	74.2592		Cima4a_ol4	42.5095	0.0425	40.0802	0.2317	-0.0046	0.2012	17.0006	0.1496	100.211	81.6758		Cima4b_ol3	38.6807
Cima1_ol4	38.0407	0.0173	39.0615	0.303	0.0025	0.4012	22.1856	0.0877	100.1	75.3484		Cima2_ol5	45.6615	0.1268	40.7462	0.2519	0.0551	0.1455	13.4831	0.3407	100.811	85.7893		Cima3_ol9	36.4619	0.0145	37.9823	0.3099	0.0022	0.4183	24.9051	0.0629	100.157	72.2974		Cima4a_ol4	42.5385	0.0309	40.0977	0.2209	0.0077	0.215	17.2904	0.1416	100.543	81.4317		Cima4b_ol6	34.8531
Cima1_ol5	42.2278	0.0343	40.0799	0.2425	0.012	0.2158	17.2359	0.1818	100.23	81.3687		Cima2_ol5	41.6299	0.0354	39.7892	0.2523	0.0316	0.2848	18.5838	0.2741	100.881	79.9727		Cima3_ol9	37.2569	0.026	38.3255	0.2763	0.0169	0.3969	23.9734	0.0728	100.345	73.477		Cima4a_ol4	42.4629	0.0378	40.096	0.2239	0.005	0.2404	17.4184	0.1404	100.625	81.2931		Cima4b_ol6	41.5178
Cima1_ol5	41.623	0.0396	39.8797	0.2204	0.0086	0.2437	17.6412	0.1774	99.8334	80.7909		Cima2_ol6	37.2959	0.0186	38.7537	0.3102	0.0103	0.4056	24.0536	0.1209	100.969	73.4323		Cima3_ol9	37.7122	0.0227	38.5526	0.2684	0.0098	0.3456	23.1882	0.0754	100.175	74.3533		Cima4a_ol4	42.4128	0.0295	40.1435	0.2173	0.0149	0.1826	17.3466	0.1462	100.493	81.3378		Cima4b_ol6	41.2697
Cima1_ol5	40.7693	0.0342	39.6728	0.2159	0.0176	0.2717	19.0009	0.1576	100.14	79.2738		Cima2_ol6	43.5543	0.0156	40.1879	0.1036	0.0058	0.2146	16.2819	0.2348	100.598	82.6644		Cima3_ol9	38.1362	0.0445	38.5062	0.2734	0.0225	0.3284	22.6805	0.0892	100.081	74.9834		Cima4a_ol4	42.7724	0.0494	40.1769	0.2214	0.0065	0.2108	17.1562	0.1368	100.73	81.6318		Cima4b_ol6	41.0489
Cima1_ol5	40.8722	0.0254	39.7694	0.2305	0.0198	0.276	19.0622	0.1589	100.415	79.2621		Cima2_ol6	43.1048	0.3244	40.0414	0.1368	0.0097	0.2211	16.0761	0.2474	100.162	82.6978		Cima3_ol9	41.2112	0.0297	39.2649	0.2571	0.0093	0.2396	19.2459	0.1108	100.368	79.2403		Cima4a_ol4	42.8874	0.0435	40.1479	0.231	0.0133	0.237	16.8264	0.1457	100.532	81.9608		Cima4b_ol6	40.9054
Cima1_ol5	40.329	0.0323	39.5803	0.2307	0.0171	0.3255	19.4401	0.1651	100.12	78.7145		Cima2_ol6	44.0527	0.0192	40.2814	0.0909	0.0024	0.1947	15.9014	0.2491	100.792	83.1604		Cima3_ol9	42.3009	0.0154	39.7554	0.2391	0.0115	0.2423	18.0154	0.1086	100.689	80.7159		Cima4a_ol4	38.26	0.0261	39.1505	0.2259	0.0049	0.349	21.9697	0.1288	100.115	75.6358		Cima4b_ol6	41.0419
Cima1_ol5	39.0909	0.0342	39.5399	0.2519	0.014	0.3224	20.6216	0.1182	99.9931	77.1643		Cima2_ol6	44.0884	0.0225	40.4218	0.0864	0.0092	0.2458	15.8262	0.2462	100.946	83.238		Cima3_ol9	40.0931	0.0171	39.1551	0.2758	0.0114	0.3395	20.4869	0.0969	100.476	77.7209		Cima4a_ol4	42.4027	0.0338	40.086	0.279	0.0092	0.2087	16.7038	0.1674	99.8906	81.9007		Cima4b_ol6	41.4309
Cima1_ol5	38.8729	0.0206	39.0678	0.2495	0.009	0.393	21.5288	0.1379	100.279	76.2959		Cima2_ol6	44.106	0.0035	40.403	0.0993	0.0057	0.1979	15.805	0.2577	100.878	83.2622		Cima3_ol13	42.4715	0.0343	39.5908	0.2401	0.0128	0.2866	17.5842	0.1215	100.342	81.1517		Cima4a_ol4	40.5398	0.0254	39.1917	0.2223	0.0155	0.2747	18.7315	0.1489	99.1497	79.4154		Cima4b_ol6	40.5063
Cima1_ol5	38.8297	0.0458	39.1882	0.2781	0.0052	0.4273	21.6658	0.1247	100.565	76.1607		Cima2_ol7	41.892	0.0302	39.944	0.228	0.0094	0.2653	18.338	0.1602	100.867	80.2847		Cima3_ol13	42.8329	0.0331	39.5651	0.2349	0.0177	0.2557	17.4126	0.137	100.489	81.4298		Cima4a_ol5	40.9013	0.0313	39.7583	0.2279	0.0142	0.2544	19.2059	0.1473	100.541	79.1502		Cima4b_ol7	35.8747
Cima1_ol6	40.5776	0.0371	39.5852	0.2049	0.0075	0.2652	19.1304	0.1488	99.9566	79.084		Cima2_ol7	44.4037	0.027	40.3909	0.2393	0.0153	0.2107	15.3917	0.2212	100.9	83.7203		Cima3_ol13	43.8713	0.0252	40.1186	0.2605	0.0218	0.2518	15.9962	0.1805	100.726	83.0189		Cima4a_ol5	42.1137	0.1301	39.9925	0.2592	0.1466	0.1984	16.556	0.1699	99.5664	81.9312		Cima4b_ol7	41.0137
Cima1_ol6	40.545	0.0335	39.6044	0.2224	0.0175	0.2917	19.3751	0.1527	100.242	78.8597		Cima2_ol7	44.3383	0.0432	40.4507	0.246	0.0104	0.1926	15.4801	0.2138	100.975	83.6219		Cima3_ol13	44.5013	0.0386	40.4286	0.2324	0.0302	0.2055	15.0254	0.1839	100.646	84.0753		Cima4a_ol5	43.157	0.0356	40.5192	0.2293	0.0128	0.2096	16.3374	0.1677	100.669	82.4836		Cima4b_ol7	43.3792
Cima1_ol6	40.6928	0.0323	39.5473	0.2067	0.0197	0.2982	19.4716	0.1446	100.413	78.8375		Cima2_ol7	44.1602	0.0391	40.3382	0.2416	0.0119	0.2091	15.7262	0.2121	100.939	83.349		Cima3_ol13	45.7043	0.0328	40.5157	0.2456	0.0284	0.1931	13.5645	0.2197	100.504	85.7271		Cima4a_ol5	39.1791	0.0284	39.3421	0.2328	-0.0098	0.2856	21.3196	0.139	100.517	76.613		Cima4b_ol7	43.3363
Cima1_ol6	40.5381	0.0376	39.4838	0.2239	0.0111	0.277	19.6965	0.1532	100.421	78.5813		Cima2_ol8	39.2545	0.0962	39.3628	0.2856	0.0106	0.3076	21.4562	0.147	100.921	76.5329		Cima3_ol13	45.513	0.0322	40.1982	0.2424	0.0291	0.1716	13.7814	0.1967	100.165	85.4797		Cima4a_ol5	43.0283	0.0646	40.1041	0.2494	0.0237	0.2094	16.447	0.1705	100.297	82.3432		Cima4b_ol7	42.8949
Cima1_ol6	40.2551	0.0227	39.6904	0.2261	0.0167	0.2954	19.6363	0.155	100.297	78.5146		Cima2_ol8	44.2224	0.0611	40.4637	0.2482	0.0175	0.2185	15.4233	0.2127	100.867	83.6364		Cima3_ol13	42.6139	0.0256	39.8148	0.2403	0.0187	0.2383	17.3614	0.146	100.459	81.3968		Cima4a_ol5	43.1721	0.0404	40.3986	0.2294	0.0166	0.2237	16.2736	0.1682	100.523	82.545		Cima4b_ol7	42.2794
Cima1_ol6	40.2109	0.0316	39.4755	0.218	0.0119	0.2775	19.7678	0.1439	100.137	78.3834		Cima2_ol8	44.7176	0.0369	40.6512	0.2412	0.0216	0.2154	14.7865	0.2344	100.905	84.3527		Cima3_ol16	42.5695	0.0322	39.0906	0.2377	0.0209	0.2836	17.4967	0.1245	99.8556	81.2631		Cima4a_ol5	43.0521	0.0397	39.8468	0.2419	0.0109	0.2258	16.5867	0.1691	100.173	82.2281		Cima4b_ol7	41.3562
Cima1_ol6	39.817	0.0329	39.3247	0.2174	0.0218	0.3298	19.9559	0.1501	99.8494	78.0542		Cima2_ol8	44.7962	0.037	40.5234	0.2294	0.0226	0.2018	14.9038	0.2311	100.945	84.2715		Cima3_ol16	43.7064	0.0428	39.3975	0.2419	0.0292	0.2132	15.7459	0.1577	99.5347	83.1875		Cima4a_ol5	42.9639	0.0288	40.1863	0.2229	0.0198	0.2308	16.8842	0.17	100.707	81.9365		Cima4b_ol7	35.0651
Cima1_ol6	39.3004	0.0159	39.1409	0.2136	0.0036	0.3102	20.3861	0.1422	99.513	77.4594		Cima2_ol8	44.4406	0.0432	40.4378	0.231	0.0213	0.2118	15.0048	0.2307	100.621	84.0754		Cima3_ol16	43.6316	0.0377	39.3624	0.2455	0.0335	0.2226	15.9413	0.1572	99.6319	82.9901		Cima4a_ol5	42.7493	0.0334	40.2152	0.2185	0.0239	0.2241	16.9811	0.1657	100.611	81.7772		Cima4b_ol8	37.0548
Cima1_ol6	39.5689	0.0279	39.3695	0.205	0.0117	0.3426	20.7779	0.1361	100.44	77.2455		Cima2_ol8	44.2673	0.0408	40.5573	0.2376	0.0243	0.2068	15.2443	0.2053	100.784	83.8093		Cima3_ol16	43.2878	0.0275	39.3614	0.2438	0.0205	0.2229	16.153	0.1556	99.4726	82.69		Cima4a_ol5	42.4994	0.0514	40.0821	0.2151	0.0193	0.2298	17.0695	0.1643	100.331	81.6119		Cima4b_ol8	37.2898
Cima1_ol7	42.0365	0.0228	39.73	0.2208	0.0195	0.2341	17.777	0.1627	100.203	80.8253		Cima2_ol8	43.9636	0.048	40.439	0.2304	0.0165	0.2335	15.8398	0.2024	100.973	83.1864		Cima3_ol16	42.8632	0.0358	39.4219	0.2633	0.0268	0.2206	16.7982	0.1438	99.7736	81.9773		Cima4a_ol5	42.2644	0.0227	40.2177	0.2163	0.0266	0.257	17.7067	0.1566	100.868	80.9702		Cima4b_ol8	39.5172
Cima1_ol7	41.6888	0.0566	39.7088	0.232	0.021	0.2404	17.7668	0.1716	99.8862	80.7052		Cima2_ol8	43.5487	0.0486	40.1472	0.2268	0.0125	0.2171	16.4409	0.1883	100.83	82.5228		Cima3_ol16	41.3604	0.0351	38.7976	0.2517	0.0125	0.2958	18.6212	0.123	99.4973	79.8362		Cima4a_ol5	41.9243	0.0362	39.9479	0.2246	0.0172	0.2578	18.1625	0.1419	100.712	80.4487		Cima4b_ol8	39.8416
Cima1_ol7	41.6396	0.0609	39.8556	0.235	0.0173	0.2139	17.8634	0.1727	100.059	80.6022		Cima2_ol8	42.1866	0.0343	39.8606	0.2238	0.0138	0.2566	18.0033	0.1706	100.749	80.6841		Cima3_ol16	38.7036	0.0195	38.1569	0.2782	0.0077	0.348	21.8771	0.0933	99.4843	75.9247		Cima4a_ol5	35.4367	0.0356	38.1698	0.3235	0.0065	0.4278	26.0853	0.1003	100.586	70.7742		Cima4b_ol8	40.2752
Cima1_ol7	41.7468	0.0355	39.8641	0.2172	0.0061	0.2753	17.9159	0.1711	100.232	80.5965		Cima2_ol9	41.3969	0.0247	39.7722	0.2403	0.0078	0.2647	18.9013	0.1549	100.763	79.6091		Cima3_ol16	36.5709	0.0108	37.7785	0.3343	0.0133	0.3843	24.445	0.0695	99.6064	72.7284		Cima4a_ol6	30.1616	0.0552	36.9573	0.4443	-0.0024	0.5995	32.368	0.0443	100.628	62.421		Cima4b_ol8	39.7716
Cima1_ol7	41.9502	0.0385	40.0434	0.2236	0.0155	0.2751	18.0311	0.1684	100.746	80.5722		Cima2_ol10	36.5098	0.0211	38.5202	0.3113	0.0041	0.4549	25.0765	0.0871	100.985	72.1862		Cima3_ol17	36.1935	0.0225	37.8186	0.3763	0.0061	0.3936	24.7584	0.0695	99.6385	72.2678		Cima4a_ol6	39.7072	0.0172	39.303	0.2115	0.0166	0.3248	20.6244	0.1259	100.331	77.4364		Cima4b_ol8	39.9352
Cima1_ol7	41.6684	0.0444	39.5953	0.2431	0.0247	0.2388	17.9694	0.1714	99.9555	80.5204		Cima2_ol10	40.8117	0.0327	39.5349	0.2335	-0.0049	0.2798	19.6216	0.1561	100.665	78.7579		Cima3_ol17	42.8509	0.0354	39.6577	0.2379	0.0226	0.2318	16.8429	0.1405	100.02	81.9338		Cima4a_ol6	41.9798	0.0346	39.8549	0.2201	0.018	0.2389	17.896	0.1551	100.397	80.7006		Cima4b_ol8	39.4065
Cima1_ol7	40.5198	0.0968	39.6352	0.2729	0.0092	0.2903	18.6891	0.1478	99.6611	79.4442		Cima2_ol10	41.6979	0.029	39.6804	0.2245	0.0224	0.2535	18.5335	0.1605	100.602	80.0423		Cima3_ol17	43.7369	0.0344	39.4731	0.2418	0.0221	0.1994	15.5823	0.1628	99.4529	83.3428		Cima4a_ol6	42.0316	0.0462	39.8625	0.2165	0.0104	0.2665	17.9317	0.1421	100.507	80.6888		Cima4b_ol8	37.9476
Cima1_ol7	39.2476	0.1343	39.5808	0.3326	0.006	0.2761	19.7396	0.1252	99.4421	77.9943		Cima2_ol10	42.1635	0.0457	39.9662	0.2324	0.0102	0.2281	17.7907	0.1554	100.592	80.8601		Cima3_ol17	43.4827	0.0382	39.341	0.2375	0.0155	0.2261	16.2646	0.1554	99.7609	82.6558		Cima4a_ol6	42.0374	0.0261	39.8212	0.2162	0.0154	0.2365	18.0765	0.1276	100.557	80.5654		Cima4b_ol8	34.7126
Cima1_ol8	40.5814	0.0299	39.5994	0.2323	0.0103	0.2878	18.9274	0.1598	99.8284	79.2614		Cima2_ol10	42.5138	0.0319	40.1168	0.2358	0.0167	0.2223	17.4822	0.1706	100.79	81.2557		Cima3_ol17	42.6134	0.0331	39.2124	0.2333	0.028	0.2361	16.6334	0.1461	99.1358	82.0365		Cima4a_ol6	41.8712	0.0543	39.8559	0.234	0.0215	0.1922	18.0181	0.1076	100.355	80.5539		Cima4b_ol9	37.5133
Cima1_ol8	40.9216	0.0363	39.8372	0.2319	0.0131	0.2918	19.2291	0.1542	100.715	79.1384		Cima2_ol10	42.5138	0.0329	39.8262	0.2417	0.0088	0.2605	17.2458	0.1772	100.307	81.4621		Cima3_ol17	43.1163	0.0387	39.3061	0.2328	0.0231	0.2261	16.3485	0.1629	99.4545	82.4601		Cima4a_ol6	42.0296	0.0253	39.7923	0.2158	0.0202	0.2652	18.0223	0.1469	100.518	80.6093		Cima4b_ol9	41.0407
Cima1_ol8	40.209	0.0315	39.4501	0.237	0.0052	0.2958	19.069	0.1524	99.4499	78.9861		Cima2_ol10	42.6839	0.034	39.8459	0.2311	0.0096	0.2616	17.3544	0.167	100.588	81.4276		Cima3_ol17	43.084	0.0326	39.2091	0.2369	0.008	0.2163	16.5228	0.1575	99.4672	82.295		Cima4a_ol6	42.0239	0.041	39.5974	0.2071	0.0185	0.2299	17.99	0.1403	100.248	80.6352		Cima4b_ol9	42.2999
Cima1_ol8	40.8741	0.0177	39.7247	0.2347	0.0155	0.2663	19.396	0.1579	100.687	78.9763		Cima2_ol10	42.2076	0.025	39.8671	0.2304	0.0167	0.2403	17.7765	0.1677	100.531	80.8886		Cima3_ol17	38.396	0.0225	38.3771	0.2957	0.0131	0.3376	21.6395	0.1005	99.182	75.9785		Cima4a_ol6	41.9717	0.0366	39.8259	0.2205	0.0234	0.239	17.9279	0.1406	100.386	80.6699		Cima4b_ol9	42.8833
Cima1_ol8	40.6452	0.0364	39.7184	0.233	0.0117	0.292	19.3232	0.164	100.424	78.9455		Cima2_ol10	39.7922	0.0266	39.2814	0.2256	0.0082	0.3265	20.8306	0.137	100.628	77.2996		Cima3_ol18	39.6009	0.023	38.8153	0.2832	0.0087	0.326	20.9417	0.1059	100.105	77.1214		Cima4a_ol6	41.0712	0.034	39.669	0.2122	0.0148	0.2866	19.3188	0.1308	100.737	79.1221		Cima4b_ol9	42.7244
Cima1_ol8	39.9158	0.0267	39.4697	0.2318	0.013	0.2638	19.9392	0.1314	99.9914	78.111		Cima2_ol11	43.6669	0.4928	40.2681	0.2963	0.0486	0.2066	14.5525	0.2831	99.8149	84.2493		Cima3_ol18	42.3762	0.0296	39.3028	0.2484	0.0095	0.2238	17.5905	0.1521	99.9329	81.1118		Cima4a_ol7	38.0405	0.0294	38.8578	0.2506	0.0034	0.3679	22.3252	0.1138	99.9886	75.2314		Cima4b_ol9	42.6374
Cima1_ol8	39.8348	0.0343	39.5591	0.2424	0.0164	0.3235	20.1686	0.1279	100.307	77.8799		Cima2_ol11	44.9349	0.035	40.581	0.2481	0.0528	0.2131	14.6388	0.2134	100.917	84.5484		Cima3_ol18	42.654	0.0489	39.2595	0.2691	0.0109	0.2395	16.9606	0.1674	99.6098	81.7617		Cima4a_ol7	41.576	0.0301	39.7866	0.2169	0.016	0.2755	18.5073	0.1372	100.546	80.0181		Cima4b_ol9	42.2119
Cima1_ol8	37.8313	0.0278	38.8871	0.2431	0.0116	0.4209	22.7337	0.0983	100.254	74.7882		Cima2_ol11	43.9344	0.1986	40.2917	0.2611	0.0469	0.258	14.9474	0.3196	100.258	83.9732		Cima3_ol18	42.3606	0.0375	39.2225	0.2633	0.015	0.2436	17.4674	0.1816	99.7915	81.2135		Cima4a_ol7	41.1545	0.0226	39.7554	0.2115	0.0154	0.2791	18.9806	0.15	100.569	79.4452		Cima4b_ol9	42.1894
Cima1_ol8	37.3341	0.0291	39.085	0.3009	0.0059	0.4652	22.9337	0.0902	100.244	74.3715		Cima2_ol12	46.0987	0.04	40.7436	0.2437	0.0481	0.1777	12.9207	0.3401	100.613	86.4128		Cima3_ol18	42.0604	0.0468	39.3764	0.255	0.0111	0.2155	17.5703	0.1961	99.7315	81.0147		Cima4a_ol7	40.4907	0.036	39.5118	0.2173	0.0042	0.3032	19.8828	0.137	100.583	78.4024		Cima4b_ol9	41.8309
Cima1_ol9	42.2839	0.0426	39.8554	0.2034	0.0051	0.2383	17.2345	0.1749	100.038	81.39		Cima2_ol12	45.1252	0.0205	40.5134	0.2386	0.0502	0.2211	14.4084	0.3197	100.897	84.8088		Cima3_ol18	42.1382	0.035	39.1686	0.2687	0.0038	0.2127	17.6662	0.1872	99.6803	80.9592		Cima4a_ol7	40.7328	0.0354	39.5269	0.213	0.0012	0.2763	19.4861	0.1318	100.403	78.8415		Cima4b_ol9	40.3157
Cima1_ol9	41.9053	0.0486	39.9832	0.2024	0.0209	0.2365	17.6712	0.1686	100.237	80.8695		Cima2_ol13	31.3795	0.0449	37.3688	0.4087	0.0052	0.606	31.1276	0.0497	100.99	64.2476		Cima3_ol18	41.6785	0.0377	39.105	0.2742	0.0139	0.2637	18.1562	0.1649	99.694	80.3615		Cima4a_ol7	41.6463	0.0291	39.8817	0.2255	0.0237	0.2181	18.3267	0.131	100.482	80.2011		Cima4b_ol11	37.0944
Cima1_ol9	41.495	0.0447	39.5239	0.2032	0.0104	0.2612	17.9823	0.17	99.6908	80.4436		Cima2_ol13	44.7598	0.0391	40.574	0.2482	0.0162	0.1904	14.8129	0.2391	100.88	84.3418		Cima3_ol18	42.45	0.0385	39.4602	0.261	0.0112	0.2326	17.2256	0.1433	99.8224	81.4574		Cima4a_ol7	41.2043	0.0524	39.8126	0.2146	0.0107	0.2223	17.7162	0.1443	99.3776	80.5672		Cima4b_ol11	41.6174
Cima1_ol9	41.3172	0.0414	39.8914	0.207	0.0123	0.2396	18.3406	0.1681	100.218	80.0627		Cima2_ol13	44.3791	0.0386	40.4452	0.234	0.0165	0.2082	15.4584	0.2164	100.996	83.6536		Cima3_ol18	42.1898	0.0429	39.315	0.2334	0.0181	0.2275	17.6183	0.1346	99.7796	81.02		Cima4a_ol7	41.4799	0.0381	39.5778	0.218	0.0117	0.221	18.7537	0.142	100.442	79.7683		Cima4b_ol11	41.3016
Cima1_ol9	41.188	0.0281	39.5931	0.2103	0.0054	0.2651	18.3185	0.1551	99.7636	80.032		Cima2_ol13	43.3337	0.0251	40.2307	0.2345	0.0201	0.2204	16.4433	0.1976	100.706	82.449		Cima3_ol18	39.0187	0.009	38.6435	0.3219	0.0013	0.3686	21.7629	0.1015	100.227	76.1678		Cima4a_ol7	34.3155	0.0308	37.9345	0.3618	-0.0046	0.4831	26.9986	0.067	100.187	69.3786		Cima4b_ol11	41.1253
Cima1_ol9	40.8539	0.0282	39.6691	0.2075	0.0193	0.2903	18.8874	0.161	100.117	79.406		Cima2_ol14	43.9529	0.582	40.0716	0.2574	0.0228	0.1878	14.7454	0.2349	100.055	84.1609		Cima3_ol21	40.9583	0.0194	38.6538	0.2586	0.0236	0.2722	19.2862	0.1268	99.599	79.1043		Cima4a_ol8	38.8167	0.0266	39.0696	0.2197	0.0032	0.3267	21.8093	0.1234	100.395	76.0347		Cima4b_ol11	40.7003
Cima1_ol9	39.9224	0.028	39.5846	0.2113	0.0101	0.3311	20.2858	0.14	100.513	77.8178		Cima2_ol14	45.0936	0.0493	40.6796	0.2406	0.0291	0.2282	14.3907	0.2504	100.962	84.8158		Cima3_ol21	42.353	0.0241	39.2453	0.2345	0.0121	0.2459	17.3984	0.133	99.6462	81.2711		Cima4a_ol8	40.8998	0.0221	39.5214	0.2111	0.0157	0.269	19.2811	0.1328	100.353	79.0853		Cima4b_ol11	40.8827
Cima1_ol9	39.0558	0.0183	38.9343	0.2212	-0.0011	0.2963	21.2521	0.1109	99.8878	76.6132		Cima2_ol14	45.1047	0.0468	40.6061	0.2414	0.0228	0.1819	14.167	0.2685	100.639	85.0195		Cima3_ol21	42.0764	0.0122	38.997	0.228	0.0062	0.2768	17.9749	0.1301	99.7017	80.6679		Cima4a_ol8	41.389	0.0249	39.6837	0.206	0.0182	0.2397	18.6762	0.1443	100.382	79.7999		Cima4b_ol11	40.9626
Cima1_ol9	38.1403	0.0248	39.0961	0.2684	0.0095	0.3611	22.6879	0.0933	100.681	74.9793		Cima2_ol14	45.4325	0.0287	40.6445	0.2412	0.0233	0.1674	14.0669	0.267	100.871	85.2012		Cima3_ol21	41.4481	0.0284	38.8873	0.2352	0.0106	0.2799	18.7812	0.1198	99.7905	79.7325		Cima4a_ol8	41.4398	0.0317	39.6638	0.2176	0.0014	0.2366	18.5448	0.1391	100.275	79.9332		Cima4b_ol11	41.2133
Cima1_ol9	36.9528	0.0385	39.0207	0.2533	0.0008	0.4402	23.4297	0.0891	100.225	73.7632		Cima2_ol14	44.8535	0.0458	40.4044	0.2468	0.0223	0.2046	14.6096	0.2396	100.627	84.5507		Cima3_ol21	35.0483	0.0221	37.4882	0.2914	0.0123	0.4213	26.6712	0.0675	100.022	70.082		Cima4a_ol8	41.9698	0.0352	39.7597	0.2274	0.0118	0.2625	18.3096	0.135	100.711	80.3385		Cima4b_ol11	41.4286
Cima1_ol10	37.1814	0.0266	38.7882	0.2918	0.0017	0.386	23.2235	0.0602	99.9594	74.0527		Cima2_ol14	44.096	0.0463	40.2869	0.244	0.0156	0.225	15.5613	0.2136	100.689	83.4747		Cima3_ol21	36.0778	0.0169	37.6642	0.2974	0.0192	0.4053	25.2792	0.0796	99.8396	71.7837		Cima4a_ol8	41.4531	0.0302	39.4033	0.219	0.0172	0.2859	18.6705	0.1498	100.229	79.8297		Cima4b_ol11	40.9119
Cima1_ol10	37.2635	0.0193	38.8018	0.2814	-0.0067	0.4236	23.3791	0.0619	100.224	73.9666		Cima2_ol14	40.9582	0.0497	39.1152	0.2503	0.0168	0.2502	19.2934	0.1529	100.087	79.0981		Cima3_ol21	37.0919	0.0269	38.2852	0.2854	0.0242	0.4223	23.7336	0.0963	99.9658	73.5863		Cima4a_ol8	40.3429	0.0215	39.2705	0.2211	0.0144	0.3002	20.3174	0.1275	100.615	77.9714		Cima4b_ol12	38.4636
Cima1_ol10	36.9645	0.0162	38.5101	0.2926	0.0002	0.3827	23.2896	0.071	99.5269	73.8854		Cima2_ol15	36.5669	0.0335	38.5221	0.2771	0.0112	0.4474	24.9839	0.1323	100.974	72.2916		Cima3_ol21	36.6933	0.0385	37.6802	0.386	0.0222	0.4157	24.0687	0.0804	99.3851	73.1009		Cima4a_ol8	36.1926	0.0269	38.2259	0.307	0.0142	0.3875	25.2459	0.0924	100.492	71.8748		Cima4b_ol12	40.6541
Cima1_ol10	36.9638	0.0237	38.6249	0.3059	-0.001	0.4515	23.8229	0.065	100.257	73.4458		Cima2_ol15	42.1654	0.0351	39.9901	0.2278	0.0282	0.2554	17.9742	0.1927	100.869	80.7014		Cima3_ol22	40.9272	0.0297	38.9167	0.2473	0.008	0.2854	19.1471	0.1173	99.6787	79.2113		Cima4a_ol9	38.2715	0.0309	38.8178	0.255	0.0075	0.3487	22.4713	0.1082	100.311	75.2228		Cima4b_ol12	41.2103
Cima1_ol10	36.4277	0.0155	38.5419	0.2815	0.004	0.4437	23.8604	0.0558	99.6304	73.129		Cima2_ol15	45.9245	0.038	40.8105	0.2257	0.0527	0.2095	13.3805	0.336	100.977	85.9516		Cima3_ol22	43.2553	0.0366	39.4394	0.2448	0.0121	0.2159	16.1268	0.1457	99.4766	82.7028		Cima4a_ol9	41.6251	0.0252	39.597	0.2222	0.0092	0.2257	18.4796	0.1512	100.335	80.0607		Cima4b_ol12	41.5321
Cima1_ol10	36.0698	0.0251	38.3908	0.3486	-0.0012	0.4868	24.9142	0.058	100.292	72.0729		Cima2_ol15	40.5282	0.0301	39.3732	0.3035	0.0226	0.3482	19.8557	0.212	100.674	78.4411		Cima3_ol22	44.3857	0.038	39.7338	0.2328	0.0283	0.211	15.0061	0.178	99.8135	84.0576		Cima4a_ol9	41.9304	0.0388	39.8453	0.2082	0.0149	0.2369	17.8955	0.1567	100.327	80.6827		Cima4b_ol12	41.6537
Cima1_ol10	31.5816	2.1655	38.5734	0.7245	-0.0022	0.6713	26.2239	0.0312	99.9691	68.2215		Cima2_ol15	43.4763	0.2916	40.3394	0.2566	0.0413	0.2172	15.2863	0.3136	100.222	83.5253		Cima3_ol22	44.5225	0.042	39.7808	0.2368	0.0314	0.2372	14.6459	0.1721	99.6688	84.4209		Cima4a_ol9	42.1218	0.0266	39.8074	0.2146	0.0135	0.2231	17.9847	0.1471	100.539	80.6763		Cima4b_ol12	42.008
Cima1_ol11	45.2562	0.0522	40.8375	0.2349	0.0301	0.1923	13.4057	0.2921	100.301	85.7507		Cima2_ol16	37.9716	0.3994	40.0262	0.2853	0.008	0.2464	20.2827	0.1401	99.3596	76.9437		Cima3_ol22	44.1305	0.0243	39.5896	0.2377	0.0179	0.2335	14.8661	0.1728	99.2724	84.1059		Cima4a_ol9	42.0847	0.0268	39.9556	0.2181	0.0108	0.2339	17.9195	0.1477	100.597	80.7189		Cima4b_ol12	42.0959
Cima1_ol11	45.2125	0.0451	40.5453	0.2345	0.042	0.1787	13.4368	0.3029	99.9978	85.7105		Cima2_ol16	36.4723	0.0427	38.7514	0.2623	0.0016	0.3754	24.5758	0.0911	100.573	72.5689		Cima3_ol22	43.5322	0.0285	39.6736	0.2351	0.0278	0.1821	15.756	0.17	99.6053	83.1226		Cima4a_ol9	41.9288	0.018	39.7976	0.2131	0.0127	0.2697	18.0975	0.1313	100.469	80.5066		Cima4b_ol12	41.6647
Cima1_ol11	44.9362	0.0392	40.6601	0.2287	0.0404	0.203	13.8342	0.2929	100.235	85.2727		Cima2_ol17	42.5466	0.0475	40.0458	0.232	0.0139	0.2207	17.642	0.1761	100.925	81.1285		Cima3_ol22	43.229	0.0383	39.8975	0.2482	0.0173	0.2236	16.3572	0.1585	100.17	82.4901		Cima4a_ol9	41.968	0.0338	39.5257	0.2079	0.0061	0.1935	18.2351	0.1549	100.325	80.4021		Cima4b_ol12	41.1858
Cima1_ol11	43.9647	0.0489	40.2953	0.2194	0.0297	0.208	14.8411	0.2449	99.8518	84.0782		Cima2_ol17	43.7474	0.0527	40.3239	0.244	0.0175	0.2271	16.1058	0.1991	100.918	82.8825		Cima3_ol22	42.7235	0.0255	39.5658	0.2458	0.0158	0.2252	16.997	0.1458	99.9443	81.7542		Cima4a_ol9	42.0245	0.0271	39.9499	0.2097	0.0165	0.221	17.7521	0.153	100.354	80.8425		Cima4b_ol12	38.9673
Cima1_ol11	43.8652	0.0516	40.3562	0.2293	0.0421	0.2423	15.3824	0.2471	100.416	83.5615		Cima2_ol17	45.0848	0.0342	40.6814	0.2414	0.0212	0.1786	14.4258	0.2424	100.91	84.7819		Cima3_ol22	41.3444	0.0203	39.3293	0.2474	0.0128	0.2255	18.4938	0.1204	99.7938	79.9403		Cima4a_ol9	40.7308	0.0366	39.4939	0.2232	0.0167	0.2471	19.6702	0.1348	100.553	78.6834		Cima4b_ol15	40.3263
Cima1_ol11	40.0142	0.0362	39.3447	0.2524	0.0196	0.3261	20.0479	0.1486	100.19	78.0602		Cima2_ol17	45.0428	0.0395	40.5691	0.2428	0.0218	0.2081	14.33	0.2597	100.714	84.8557		Cima3_ol23	40.7858	0.0318	38.6001	0.2495	0.0089	0.2915	19.1094	0.129	99.206	79.1868		Cima4a_ol10	40.8666	0.0373	39.5234	0.2119	0.0143	0.2336	19.0389	0.1374	100.064	79.2801		Cima4b_ol15	40.0264
Cima1_ol11	39.5961	0.0297	39.2966	0.2372	0.0063	0.3283	20.37	0.1331	99.9974	77.604		Cima2_ol17	44.7577	0.0602	40.5924	0.2307	0.0207	0.2055	14.4621	0.2449	100.574	84.6549		Cima3_ol23	42.6406	0.043	38.9194	0.2287	0.0129	0.2104	16.9119	0.1644	99.1312	81.8001		Cima4a_ol10	42.9972	0.0397	39.9643	0.2237	0.0308	0.2284	16.5507	0.2028	100.238	82.241		Cima4b_ol15	39.6441
Cima1_ol12	42.2769	0.0541	40.4049	0.2205	0.0214	0.2552	16.7303	0.1867	100.15	81.8331		Cima2_ol17	43.5523	0.0455	40.2006	0.229	0.0191	0.2352	16.2368	0.1977	100.716	82.7034		Cima3_ol23	42.6949	0.0415	39.0915	0.2323	0.0188	0.2168	16.67	0.1712	99.137	82.0322		Cima4a_ol10	42.5146	0.0333	39.9528	0.2412	0.0296	0.2365	17.0661	0.2168	100.291	81.6201		Cima4b_ol15	40.4635
Cima1_ol12	41.7012	0.0492	40.3272	0.216	0.0109	0.2151	16.9837	0.1844	99.6877	81.402		Cima2_ol18	36.1793	0.0243	38.5477	0.282	0.0055	0.4511	25.4143	0.0892	100.993	71.7325		Cima3_ol23	41.9268	0.0389	39.043	0.2753	0.013	0.2652	17.8878	0.1587	99.6087	80.688		Cima4a_ol10	44.0568	0.0383	40.329	0.217	0.0211	0.1982	15.0029	0.23	100.093	83.9606		Cima4b_ol15	40.1694
Cima1_ol12	42.1169	0.0344	40.2148	0.2163	0.0056	0.2785	17.299	0.1756	100.341	81.2732		Cima2_ol18	36.7277	0.0235	38.4292	0.2662	0.0158	0.3914	24.5178	0.1233	100.495	72.7543		Cima3_ol23	42.4255	0.0381	39.3441	0.2461	0.0271	0.2188	17.0313	0.149	99.4801	81.6191		Cima4a_ol10	44.035	0.0465	40.013	0.2237	0.0236	0.226	15.1282	0.2064	99.9024	83.8417		Cima4b_ol15	39.7696
Cima1_ol12	41.1859	0.0324	39.7679	0.2233	0.01	0.2454	18.2357	0.1666	99.8673	80.1036		Cima2_ol18	34.9979	0.1688	38.4332	0.3144	0.0068	0.4473	26.1142	0.1247	100.607	70.4927		Cima3_ol23	40.9259	0.0247	38.5779	0.2524	0.009	0.2787	19.0826	0.1166	99.2676	79.2663		Cima4a_ol10	43.5567	0.0467	40.0142	0.2232	0.018	0.2205	16.5186	0.1797	100.778	82.4572		Cima4b_ol15	40.0291
Cima1_ol12	41.3254	0.046	39.6878	0.2419	0.0242	0.2525	18.3951	0.1653	100.138	80.0187		Cima2_ol18	36.0746	0.0339	38.3771	0.2732	0.0182	0.4507	25.2411	0.1163	100.585	71.8125		Cima3_ol25	39.8948	0.0317	38.982	0.2463	0.0248	0.2953	19.9115	0.1128	99.4993	78.126		Cima4a_ol10	41.8822	0.0351	39.9241	0.2215	0.0185	0.2252	18.0377	0.1515	100.496	80.5412		Cima4b_ol15	41.1486
Cima1_ol12	41.0647	0.0385	40.0771	0.2137	0.0208	0.2763	18.8163	0.1465	100.654	79.5515		Cima2_ol18	37.511	0.0207	38.7032	0.2581	0.0126	0.4078	23.7551	0.1412	100.81	73.7864		Cima3_ol25	44.8163	0.0339	40.0002	0.2302	0.0328	0.2121	14.42	0.2042	99.9498	84.7099		Cima4a_ol10	36.3762	0.0164	38.5664	0.2779	0.006	0.3729	24.9514	0.0882	100.655	72.2131		Cima4b_ol15	39.53
Cima1_ol12	40.847	0.037	39.7019	0.2166	0.0194	0.2997	18.9991	0.1582	100.279	79.3067		Cima2_ol18	38.2534	0.0162	38.8967	0.2356	0.0145	0.3647	22.5907	0.1359	100.508	75.1151		Cima3_ol25	42.0371	0.0299	39.0771	0.2534	0.0248	0.2864	17.6697	0.1628	99.5411	80.9192		Cima4a_ol11	40.0969	0.0189	39.3591	0.2519	0.0038	0.3032	20.2607	0.1259	100.42	77.9144		Cima4b_ol16	36.6547
Cima1_ol12	40.4951	0.0402	39.3668	0.2291	-0.0009	0.2811	19.0258	0.162	99.5992	79.1411		Cima2_ol18	38.4362	0.0339	38.8572	0.2375	0.0103	0.3792	22.4053	0.1267	100.486	75.3575		Cima3_ol25	44.0285	0.0407	39.8863	0.2735	0.0229	0.2138	15.2225	0.1827	99.8708	83.7553		Cima4a_ol11	41.7001	0.0308	39.6022	0.2363	-0.0025	0.2772	18.5522	0.1336	100.53	80.0269		Cima4b_ol16	36.2725
Cima1_ol12	38.5744	0.0228	38.7663	0.2631	0.0047	0.3459	21.0709	0.1213	99.1694	76.5444		Cima2_ol18	38.021	0.0245	38.925	0.239	0.0192	0.3941	22.8934	0.1342	100.65	74.7507		Cima3_ol25	44.118	0.0385	39.7763	0.2271	0.033	0.2016	14.8458	0.1922	99.4325	84.1204		Cima4a_ol11	39.5056	0.0211	39.2217	0.2262	0.0068	0.2866	21.3644	0.1215	100.754	76.7239		Cima4b_ol16	39.2192
Cima1_ol12	36.5457	0.0215	38.5274	0.3147	0.0055	0.4726	23.6408	0.0763	99.6046	73.3734		Cima2_ol18	35.7626	0.043	38.453	0.2787	0.012	0.4496	25.5928	0.1148	100.707	71.3544		Cima3_ol25	43.8594	0.0448	40.0444	0.2307	0.0294	0.2234	15.3711	0.1936	99.9967	83.5697		Cima4a_ol11	39.2207	0.0001	39.1188	0.2317	0.0139	0.3456	21.1501	0.1278	100.209	76.7746		Cima4b_ol16	40.5102
Cima1_ol13	37.3351	0.1663	38.8802	1.2241	0.004	0.3745	22.0819	0.0887	100.155	75.0866		Cima2_ol18	33.4162	0.0239	37.7166	0.3275	0.0082	0.5526	28.6	0.074	100.719	67.5615		Cima3_ol25	45.6972	0.0476	40.1767	0.2296	0.0594	0.2086	12.9717	0.2319	99.6227	86.2634		Cima4a_ol11	38.6581	0.0306	39.0368	0.3004	0.0063	0.3772	22.2708	0.1064	100.787	75.5755		Cima4b_ol16	39.9774
Cima1_ol14	45.4247	0.0524	40.7301	0.2165	0.044	0.1871	13.1882	0.3029	100.146	85.9941		Cima2_ol19	43.4621	0.015	40.2653	0.117	0.0124	0.2395	16.363	0.2654	100.74	82.5625		Cima3_ol25	45.0132	0.0359	40.4633	0.2273	0.0353	0.1812	13.5439	0.1992	99.6993	85.5583		Cima4a_ol11	34.3969	0.0199	38.2571	0.3052	-0.0002	0.4529	27.2563	0.0782	100.766	69.2269		Cima4b_ol16	39.7306
Cima1_ol14	44.5482	0.0648	40.5659	0.2852	0.027	0.1782	14.3868	0.1711	100.227	84.6618		Cima2_ol19	46.5523	0.0196	40.993	0.1042	0.0291	0.1843	12.5024	0.3188	100.704	86.9066		Cima3_ol25	39.0469	0.0431	38.4702	0.3134	0.0121	0.3462	20.9295	0.0987	99.2599	76.8822		Cima4a_ol11	39.8048	0.0296	39.4217	0.2201	-0.0029	0.2815	20.6953	0.1243	100.574	77.4194		Cima4b_ol16	39.7454
Cima1_ol14	44.3715	0.0522	40.6877	0.2784	0.0094	0.1768	14.9907	0.1036	100.67	84.0672		Cima2_ol19	46.8762	0.0224	41.0491	0.0861	0.013	0.1978	12.1501	0.336	100.731	87.3054		Cima3_ol26	45.1534	0.0433	40.2144	0.2252	0.0477	0.1678	13.4565	0.2248	99.533	85.6764		Cima4a_ol11	38.4711	0.0256	38.8494	0.2278	0.005	0.3522	22.495	0.0993	100.525	75.3		Cima4b_ol16	39.4513
Cima1_ol14	43.5373	0.0404	40.4227	0.2745	-0.0036	0.1898	15.4758	0.0576	99.9945	83.3744		Cima2_ol19	47.0048	0.0107	41.189	0.0805	0.0099	0.182	11.8733	0.3472	100.697	87.5884		Cima3_ol26	45.9344	0.0262	40.4776	0.2265	0.0468	0.1781	12.8705	0.246	100.006	86.4167		Cima4a_ol11	37.9977	0.0294	38.8391	0.2146	0.0063	0.396	23.071	0.1057	100.66	74.5928		Cima4b_ol16	39.349
Cima1_ol14	43.7692	0.0679	40.3475	0.2564	-0.0054	0.1594	15.7625	0.0429	100.4	83.193		Cima2_ol19	46.9833	0.0274	41.148	0.0825	0.0053	0.19	11.9627	0.356	100.755	87.5018		Cima3_ol26	44.8422	0.0363	40.0813	0.2314	0.0353	0.2034	14.1372	0.2149	99.7821	84.9721		Cima4a_ol12	47.2327	0.0148	41.2118	0.0751	0.0134	0.1431	11.3058	0.3666	100.363	88.1616		Cima4b_ol17	41.5837
Cima1_ol14	43.2582	0.0527	40.2388	0.2655	-0.0004	0.1431	15.9095	0.0544	99.9218	82.8969		Cima2_ol19	47.0568	0.0136	41.2721	0.0813	0.0108	0.1834	11.8706	0.3616	100.85	87.6031		Cima3_ol26	43.8671	0.0371	39.6972	0.2278	0.042	0.203	15.6779	0.2124	99.9645	83.2991		Cima4a_ol12	47.3582	0.0173	41.4026	0.0702	-0.001	0.1637	11.3846	0.3633	100.759	88.1168		Cima4b_ol17	44.9202
Cima1_ol14	42.6955	0.0315	40.2838	0.2463	0.0138	0.231	16.7022	0.1706	100.375	82.0041		Cima2_ol19	47.3035	0.0219	41.2098	0.082	0.0094	0.1663	11.8396	0.355	100.987	87.6879		Cima3_ol26	44.7355	0.0462	39.9669	0.2325	0.0303	0.1851	14.3836	0.2086	99.7888	84.719		Cima4a_ol12	47.225	0.0125	41.3036	0.0727	0.0055	0.146	11.3194	0.3669	100.452	88.1474		Cima4b_ol17	45.2637
Cima1_ol14	42.8805	0.0235	40.319	0.2559	0.0253	0.2103	16.8504	0.2134	100.778	81.9374		Cima2_ol19	45.3042	0.1312	41.1521	0.2661	0.0338	0.1769	13.5326	0.3265	100.923	85.6481		Cima3_ol26	43.3585	0.0324	39.6982	0.2364	0.022	0.2255	15.808	0.1674	99.5484	83.02		Cima4a_ol12	47.1573	0.006	41.3746	0.077	0.0089	0.166	11.4144	0.3803	100.585	88.0447		Cima4b_ol17	45.2841
Cima1_ol14	38.9764	0.0192	39.2168	0.2614	0.0112	0.3568	20.962	0.1138	99.9176	76.8225		Cima2_ol20	45.1593	0.0299	40.7787	0.2489	0.051	0.1861	13.939	0.3432	100.736	85.2404		Cima3_ol26	41.6647	0.0321	39.2718	0.2357	0.0142	0.2742	18.077	0.1249	99.6946	80.4251		Cima4a_ol12	47.2292	0.0087	41.34	0.0798	0.0111	0.1757	11.4338	0.3597	100.638	88.0428		Cima4b_ol17	45.3865
Cima1_ol15	42.9593	0.0481	40.0562	0.2397	0.024	0.1814	16.1017	0.1792	99.7894	82.6266		Cima2_ol20	45.5236	0.0439	40.7972	0.26	0.0341	0.1739	13.6722	0.3184	100.823	85.5812		Cima3_ol26	39.6862	0.0156	38.8	0.2855	0.0732	0.3229	20.5141	0.1109	99.8084	77.5206		Cima4a_ol12	44.5061	0.0022	40.4185	0.0772	0.0036	0.212	14.6475	0.3314	100.198	84.4146		Cima4b_ol17	45.3277
Cima1_ol15	43.0246	0.0395	40.0141	0.2139	0.012	0.2507	16.3792	0.2005	100.135	82.4022		Cima2_ol20	46.1547	0.0338	40.9043	0.2547	0.0562	0.1484	13.0531	0.363	100.968	86.307		Cima3_ol26	35.2141	0.0239	38.1015	0.4168	0.0167	0.4224	25.8585	0.0646	100.119	70.8244		Cima4a_ol12	46.1248	-0.003	40.918	0.0888	0.0085	0.201	12.8542	0.3477	100.54	86.4801		Cima4b_ol17	45.3336
Cima1_ol15	42.7769	0.0448	39.8969	0.2242	0.0203	0.1934	16.3261	0.1715	99.6541	82.3653		Cima2_ol20	45.9339	0.0417	40.9857	0.2453	0.0534	0.1732	13.189	0.3482	100.97	86.127		Cima3_ol27	42.7372	0.0337	39.431	0.2386	0.0264	0.2307	16.8155	0.1373	99.6503	81.9184		Cima4a_ol13	41.3356	0.0405	39.6577	0.216	0.0215	0.2302	18.6092	0.1525	100.263	79.8369		Cima4b_ol17	45.1334
Cima1_ol15	42.7884	0.0433	40.2768	0.2242	0.0208	0.1961	16.5532	0.1785	100.281	82.1678		Cima2_ol20	45.7348	0.0245	40.8879	0.2419	0.04	0.1966	13.2868	0.3488	100.761	85.9864		Cima3_ol27	45.2445	0.0465	39.9704	0.2394	0.0339	0.2279	13.5138	0.2102	99.4866	85.6491		Cima4a_ol13	42.2725	0.0457	39.6966	0.2108	0.0276	0.2607	17.4956	0.1696	100.179	81.157		Cima4b_ol17	42.8637
Cima1_ol15	42.7207	0.0487	40.0363	0.2305	0.019	0.2331	16.5329	0.186	100.007	82.1626		Cima2_ol20	45.0074	0.0341	40.5882	0.2487	0.0586	0.2132	14.2471	0.325	100.722	84.9201		Cima3_ol27	45.8968	0.0348	40.2078	0.2372	0.0387	0.1712	12.7626	0.2324	99.5814	86.5055		Cima4a_ol13	43.1045	0.0322	39.9476	0.2139	0.0138	0.2511	16.6494	0.1721	100.385	82.1905		Cima4b_ol18	36.3498
Cima1_ol15	42.7309	0.0503	40.1087	0.2405	0.0202	0.2175	16.5417	0.1864	100.096	82.1582		Cima2_ol20	43.87	0.0282	40.2508	0.2448	0.049	0.2119	15.7542	0.2991	100.708	83.2324		Cima3_ol27	45.6968	0.0534	39.8964	0.2298	0.0375	0.1835	13.0341	0.2271	99.3584	86.2063		Cima4a_ol13	43.7544	0.0334	40.2291	0.2212	0.0206	0.2199	15.5476	0.185	100.211	83.3792		Cima4b_ol18	35.9421
Cima1_ol15	42.6218	0.0388	40.1957	0.2115	0.0167	0.2689	16.8393	0.1912	100.384	81.8575		Cima2_ol20	41.954	0.0245	39.6734	0.2259	0.0233	0.2675	18.4389	0.2127	100.82	80.2212		Cima3_ol27	39.6596	0.0256	38.711	0.2463	0.0269	0.3648	20.3645	0.1537	99.5524	77.6364		Cima4a_ol13	43.9949	0.0434	40.2793	0.2212	0.0195	0.2104	15.1255	0.2129	100.107	83.8318		Cima4b_ol18	34.3227
Cima1_ol15	41.7654	0.0304	39.9731	0.2221	0.0157	0.2661	17.7943	0.1687	100.236	80.7096		Cima2_ol20	38.9028	0.0308	38.9843	0.2396	0.0074	0.3553	22.1242	0.1316	100.776	75.8131		Cima3_ol27	45.3346	0.0435	39.8795	0.2321	0.0327	0.1866	13.4087	0.2342	99.352	85.7689		Cima4a_ol13	44.4504	0.0454	40.5	0.2097	0.0252	0.2182	14.742	0.213	100.404	84.3134		Cima4b_ol18	38.1403
Cima1_ol15	41.4539	0.0268	39.7525	0.207	0.0185	0.2397	18.2678	0.1643	100.13	80.1788		Cima2_ol21	38.1568	0.0273	38.8929	0.2438	0.0156	0.3661	22.9935	0.1223	100.818	74.7355		Cima3_ol27	45.804	0.047	39.9775	0.2309	0.0379	0.2183	13.2318	0.2265	99.7739	86.0544		Cima4a_ol13	44.418	0.0376	40.4365	0.223	0.0156	0.1648	14.7382	0.2123	100.246	84.3073		Cima4b_ol18	40.9531
Cima1_ol15	40.2069	0.0288	39.4699	0.2227	0.0052	0.3131	19.7025	0.1286	100.078	78.4377		Cima2_ol21	40.2148	0.0342	39.4331	0.2349	0.0117	0.3177	20.523	0.1443	100.914	77.743		Cima3_ol27	44.9279	0.0426	39.6708	0.23	0.0235	0.1719	13.8332	0.1972	99.0971	85.2715		Cima4a_ol13	44.3579	0.04	40.2637	0.2209	0.023	0.1977	15.0347	0.212	100.35	84.0236		Cima4b_ol18	40.9629
Cima1_ol16	42.9215	0.0298	39.9263	0.2155	0.009	0.2289	16.5866	0.1897	100.107	82.1835		Cima2_ol21	41.2278	0.0358	39.5856	0.2352	0.0162	0.2775	18.9391	0.1424	100.46	79.51		Cima3_ol27	42.5124	0.0377	39.2905	0.2317	0.0244	0.2473	17.3218	0.1376	99.8035	81.395		Cima4a_ol13	39.3893	0.0349	39.1047	0.237	0.0173	0.3165	21.0583	0.1586	100.317	76.9284		Cima4b_ol18	40.8015
Cima1_ol16	42.6401	0.0562	39.9674	0.2031	0.0113	0.2458	16.7511	0.1897	100.065	81.9415		Cima2_ol21	41.6815	0.0365	39.6587	0.225	0.0111	0.2336	18.6231	0.1394	100.609	79.9586		Cima3_ol28	43.1807	0.0319	39.6181	0.2452	0.024	0.2237	16.3494	0.121	99.7941	82.4809		Cima4a_ol14	43.6303	0.0415	40.2022	0.2268	0.0335	0.1864	15.5838	0.191	100.096	83.3075		Cima4b_ol18	40.883
Cima1_ol16	42.586	0.0601	39.8546	0.2065	0.0198	0.2406	16.7855	0.1869	99.9401	81.8925		Cima2_ol21	41.9164	0.0458	38.8295	0.2297	0.0126	0.2334	18.1338	0.1424	99.5436	80.4704		Cima3_ol28	42.7856	0.0414	39.4982	0.2258	0.0148	0.2179	17.0931	0.0737	99.9505	81.6915		Cima4a_ol14	44.3073	0.0455	40.3575	0.2326	0.0282	0.2143	14.8085	0.2138	100.208	84.211		Cima4b_ol19	35.1297
Cima1_ol16	42.2707	0.0452	39.8307	0.2148	0.015	0.2806	17.1296	0.188	99.9746	81.4775		Cima2_ol21	41.3869	0.0385	39.7269	0.2236	0.0184	0.2208	18.8584	0.1294	100.603	79.642		Cima3_ol28	42.7195	0.0389	39.3332	0.232	0.017	0.2217	17.3423	0.0842	99.9886	81.4509		Cima4a_ol14	44.4568	0.0465	40.358	0.2197	0.0288	0.1758	14.7986	0.1883	100.273	84.2645		Cima4b_ol19	25.5037
Cima1_ol16	42.1358	0.056	39.8876	0.2075	0.0135	0.2203	17.3218	0.1782	100.021	81.2599		Cima2_ol21	41.3862	0.0266	39.6526	0.2181	0.0117	0.2268	18.8135	0.1421	100.478	79.6804		Cima3_ol28	43.0669	0.0389	39.5089	0.2242	0.0114	0.1971	16.8446	0.066	99.9578	82.0065		Cima4a_ol14	44.3578	0.0529	40.3693	0.2357	0.0315	0.1783	14.7986	0.1964	100.22	84.2351		Cima4b_ol19	34.9457
Cima1_ol16	41.7525	0.0387	39.6571	0.2049	0.0159	0.2333	17.5782	0.1707	99.6513	80.8943		Cima2_ol21	41.6049	0.0355	39.7255	0.2352	0.0205	0.2502	18.8139	0.1507	100.836	79.7652		Cima3_ol28	43.114	0.0356	39.7585	0.2307	0.0138	0.2262	16.6114	0.0594	100.049	82.2274		Cima4a_ol14	44.3741	0.0477	40.3532	0.2234	0.0279	0.1731	14.6467	0.1906	100.037	84.3764		Cima4b_ol19	35.5288
Cima1_ol16	41.1356	0.0482	39.4146	0.2099	0.0171	0.2629	18.3458	0.1737	99.6078	79.9878		Cima2_ol21	39.7011	0.0542	39.5139	0.2244	0.0261	0.3057	20.8049	0.1608	100.791	77.2812		Cima3_ol28	43.1501	0.0342	39.5819	0.2406	0.0196	0.2484	17.0161	0.1106	100.401	81.8851		Cima4a_ol14	44.2953	0.0882	40.3958	0.2338	0.0163	0.1698	14.6093	0.196	100.004	84.3865		Cima4b_ol19	36.6942
Cima1_ol16	41.0306	0.0221	39.6145	0.2209	0.0169	0.2704	18.9224	0.1552	100.253	79.4462		Cima2_ol22	42.234	0.0269	39.8948	0.2209	0.0116	0.2614	18.1059	0.1562	100.912	80.6131		Cima3_ol28	43.3643	0.0448	39.5768	0.2478	0.0126	0.2251	16.3838	0.118	99.9731	82.5117		Cima4a_ol14	44.4533	0.0472	40.3895	0.2239	0.0199	0.2085	14.7255	0.2018	100.269	84.3292		Cima4b_ol19	36.3773
Cima1_ol16	37.4556	0.0276	38.8437	0.2945	0.0074	0.3962	23.1	0.0796	100.204	74.2955		Cima2_ol22	43.4943	0.0408	40.2245	0.2182	0.02	0.2505	16.4439	0.2015	100.894	82.5021		Cima3_ol28	42.3879	0.0264	39.2826	0.2476	0.0365	0.222	17.2209	0.1424	99.5662	81.4393		Cima4a_ol14	44.1799	0.0278	40.1337	0.2394	0.0195	0.1809	14.9673	0.2108	99.9593	84.03		Cima4b_ol19	37.0904
Cima1_ol17	40.3071	0.0336	39.4601	0.1972	0.016	0.2703	19.4065	0.1912	99.882	78.7344		Cima2_ol22	42.5926	0.0455	40.0061	0.233	0.0115	0.2416	17.6638	0.1832	100.977	81.1261		Cima3_ol31	41.5115	0.0361	39.0556	0.2404	0.0132	0.2626	18.4204	0.1122	99.652	80.0686		Cima4a_ol14	43.5392	0.03	40.1517	0.2244	0.0119	0.1702	16.0095	0.1931	100.33	82.9		Cima4b_ol19	37.6801
Cima1_ol17	40.2223	0.0217	39.4837	0.1936	0.0056	0.2684	19.5615	0.1974	99.9542	78.5655		Cima2_ol23	43.9996	0.0409	40.4058	0.2286	0.0196	0.1893	15.7955	0.2017	100.881	83.237		Cima3_ol31	40.6936	0.0239	39.1093	0.2441	0.0167	0.2767	19.017	0.1129	99.4941	79.2292		Cima4a_ol15	38.6179	0.0259	38.9739	0.2312	0.0082	0.3366	21.896	0.1331	100.223	75.8684		Cima4b_ol19	38.6148
Cima1_ol17	40.3332	0.0301	39.4364	0.1974	0.0177	0.261	19.6254	0.1925	100.094	78.5566		Cima2_ol23	43.9956	0.036	40.2636	0.2319	0.0169	0.2084	15.7626	0.1972	100.712	83.2647		Cima3_ol31	40.0193	0.0305	38.7544	0.2639	0.0363	0.3093	20.0504	0.1227	99.5869	78.0601		Cima4a_ol15	41.8069	0.032	39.6383	0.2237	0.0113	0.22	17.8404	0.1605	99.9331	80.6849		Cima4b_ol19	34.5262
Cima1_ol17	40.4191	0.0219	39.5534	0.2037	0.0235	0.3175	19.6726	0.1606	100.372	78.5521		Cima2_ol23	43.9219	0.0421	40.3012	0.2343	0.0117	0.2139	16.0601	0.1965	100.982	82.9789		Cima3_ol31	39.8484	0.0238	38.7085	0.2402	0.01	0.2844	20.3459	0.1048	99.5661	77.7346		Cima4a_ol15	41.7293	0.0429	39.6625	0.2187	0.026	0.2565	18.1822	0.141	100.259	80.3582		Cima4b_ol20	38.282
Cima1_ol17	40.4089	0.0382	39.649	0.1997	0.0155	0.2618	19.6722	0.1915	100.437	78.5482		Cima2_ol24	44.9447	0.1019	40.718	0.2704	0.0221	0.1989	14.2936	0.2593	100.809	84.8602		Cima3_ol31	38.6395	0.0277	38.397	0.2468	0.0104	0.3095	21.6541	0.1025	99.3873	76.0814		Cima4a_ol15	41.8023	0.0426	39.6685	0.2266	0.0271	0.2377	18.1565	0.1408	100.302	80.4078		Cima4b_ol20	44.0133
Cima1_ol17	40.1795	0.0336	39.5545	0.205	0.0115	0.3188	19.6784	0.1795	100.161	78.4469		Cima2_ol24	44.4552	0.0263	40.2477	0.2289	0.0233	0.2298	15.3501	0.2463	100.807	83.7729		Cima3_ol31	39.4727	0.0159	38.6325	0.2329	0.0049	0.3303	20.9218	0.1133	99.7242	77.0807		Cima4a_ol15	41.6423	0.0326	39.5016	0.2212	0.01	0.2394	17.9963	0.1299	99.7734	80.4871		Cima4b_ol20	44.2316
Cima1_ol17	40.0598	0.03	39.5894	0.2103	0.0051	0.2815	19.9095	0.1558	100.241	78.198		Cima2_ol24	44.8596	0.0432	40.5602	0.243	0.0252	0.1949	14.7051	0.2571	100.888	84.4671		Cima3_ol31	39.686	0.0112	38.6185	0.2335	0.0184	0.3208	20.6429	0.1015	99.6328	77.4114		Cima4a_ol15	41.8296	0.0247	39.7085	0.2148	0.0139	0.2163	17.9847	0.1447	100.137	80.5676		Cima4b_ol20	43.9678
Cima1_ol17	40.0715	0.0255	39.5048	0.2273	0.0302	0.3031	19.9749	0.1434	100.281	78.147		Cima2_ol25	42.9666	0.0372	40.2852	0.2368	0.0126	0.2464	17.0149	0.1013	100.901	81.8229		Cima3_ol31	40.4747	0.0233	38.9778	0.2758	0.0137	0.2915	19.675	0.1149	99.8468	78.5732		Cima4a_ol15	41.7312	0.0248	39.5908	0.2202	0.035	0.2462	17.8031	0.1458	99.7971	80.6892		Cima4b_ol20	43.2838
Cima1_ol17	39.9051	0.0282	39.4807	0.2419	0.0175	0.3073	20.3771	0.1287	100.487	77.7327		Cima2_ol25	41.9171	0.0483	39.9949	0.2096	0.0002	0.2657	18.5027	0.0459	100.984	80.1522		Cima3_ol31	35.7949	0.02	37.6804	0.3702	0.0124	0.4231	25.1346	0.0718	99.5074	71.7405		Cima4a_ol15	40.5758	0.02	39.1534	0.2184	0.0271	0.2704	19.4022	0.1318	99.7991	78.8489		Cima4b_ol20	42.7738
Cima1_ol18	38.0817	0.0187	38.8473	0.3012	0.003	0.3664	21.6737	0.1045	99.3966	75.7991		Cima2_ol25	40.9087	0.0397	39.6837	0.2252	0.0097	0.2949	19.649	0.1648	100.976	78.7743		Cima3_ol33	29.693	0.1454	36.571	0.4828	0.0033	0.5999	31.9953	0.0497	99.5405	62.3254		Cima4a_ol15	35.6432	0.1441	39.21	0.3169	0.0149	0.3643	23.4549	0.0948	99.2431	73.0379		Cima4b_ol20	42.1947
Cima1_ol18	38.37	0.0383	38.8959	0.2922	-0.0014	0.3775	21.9146	0.1059	99.993	75.7347		Cima2_ol25	36.5567	0.0773	38.5602	0.2543	-0.0001	0.3896	24.9638	0.102	100.904	72.3022		Cima3_ol33	33.9763	0.0452	37.4464	0.3873	0.0091	0.4735	27.7259	0.0743	100.138	68.5973		Cima4a_ol16	31.4977	0.0239	37.145	0.4026	-0.0048	0.5277	30.6011	0.0643	100.257	64.7244		Cima4b_ol20	41.163
Cima1_ol18	37.9036	0.0278	38.6074	0.3278	0.0193	0.3305	21.9103	0.1144	99.2411	75.5127		Cima2_ol25	39.8637	0.1338	39.2003	0.294	0.0061	0.3774	20.2047	0.1439	100.224	77.8615		Cima3_ol33	38.4292	0.0737	40.1227	0.6279	0.0045	0.2724	21.1261	0.0982	100.755	76.4296		Cima4a_ol16	45.389	-0.0021	40.5467	0.074	0.009	0.1838	13.3754	0.3139	99.8897	85.8138		Cima4b_ol20	38.7391
Cima1_ol18	38.141	0.0219	38.8424	0.3142	0.0026	0.392	22.3017	0.0977	100.114	75.3003		Cima2_ol26	43.0249	0.044	39.965	0.2325	0.013	0.2166	16.9766	0.1874	100.66	81.8766		Cima3_ol33	41.3533	0.0251	39.1149	0.1952	0.0233	0.2727	18.7117	0.1287	99.8248	79.7553		Cima4a_ol16	47.2157	0.0074	41.0066	0.0763	-0.0042	0.1708	11.1483	0.3653	99.9861	88.3036		Cima4b_ol20	37.2993
Cima1_ol18	37.8798	0.0266	38.6975	0.3202	0.01	0.3696	22.7619	0.0953	100.161	74.7891		Cima2_ol26	42.962	0.035	39.9932	0.2194	0.0097	0.2425	17.157	0.1903	100.809	81.6974		Cima3_ol33	40.165	0.035	38.7164	0.208	0.0105	0.2991	19.956	0.1144	99.5045	78.2029		Cima4a_ol16	47.3686	0.0192	41.0496	0.073	0.0069	0.2019	10.9054	0.3662	99.9907	88.5621		Cima4b_ol21	38.9688
Cima1_ol18	37.5333	0.0239	38.7445	0.3136	0.0041	0.4184	23.3345	0.071	100.443	74.142		Cima2_ol26	42.2095	0.0366	39.805	0.2173	0.0096	0.2541	17.9133	0.1698	100.615	80.7704		Cima3_ol33	39.8489	0.0266	38.7302	0.1866	0.0171	0.3177	20.6197	0.1031	99.8499	77.5026		Cima4a_ol16	47.5164	0.0127	41.0257	0.0723	0.0027	0.1803	10.8779	0.3812	100.069	88.6189		Cima4b_ol21	40.6795
Cima1_ol18	37.295	0.0345	38.5618	0.3001	0.0024	0.4122	23.3509	0.09	100.047	74.0063		Cima2_ol26	41.6936	0.0303	39.8214	0.2224	0.0172	0.2737	18.7278	0.1639	100.95	79.8734		Cima3_ol33	37.3195	0.0134	38.0157	0.2543	0.0217	0.3654	23.7015	0.0856	99.777	73.731		Cima4a_ol16	47.4043	0.0043	41.0057	0.0714	0.0062	0.1552	10.8522	0.3608	99.8601	88.619		Cima4b_ol21	41.7186
Cima1_ol18	36.733	0.0292	38.3855	0.3349	0.0085	0.4624	23.701	0.0613	99.7158	73.4236		Cima2_ol26	40.1587	0.036	39.4217	0.2297	0.0216	0.2986	20.3644	0.1463	100.677	77.853		Cima3_ol34	43.6715	0.0367	39.3742	0.2475	0.03	0.2088	15.7178	0.1654	99.4517	83.2013		Cima4a_ol16	47.2361	0.0061	40.9478	0.0751	0.008	0.1447	11.338	0.3696	100.125	88.1328		Cima4b_ol21	39.2517
Cima1_ol18	36.4745	0.0283	38.2945	0.3291	0.0032	0.4522	23.8185	0.0724	99.4726	73.1887		Cima2_ol26	37.036	0.0238	38.6148	0.2708	0.0175	0.4126	24.4036	0.0983	100.877	73.0118		Cima3_ol34	45.565	0.0334	39.8594	0.2272	0.0268	0.1692	13.1757	0.2209	99.2776	86.0427		Cima4a_ol16	46.2554	0.0126	40.8489	0.0752	0.0053	0.1397	12.312	0.325	99.9741	87.0079		Cima4b_ol21	41.3315
Cima1_ol19	41.6783	0.044	39.4617	0.22	0.0118	0.2324	17.6318	0.178	99.4578	80.8196		Cima2_ol27	37.0228	0.024	38.7728	0.2677	0.0071	0.3517	24.3463	0.1155	100.908	73.051		Cima3_ol34	45.9841	0.0266	39.9597	0.2458	0.0344	0.171	12.8997	0.219	99.5402	86.4028		Cima4a_ol16	43.4645	0.0151	40.0933	0.0812	0.0135	0.2559	16.101	0.2634	100.288	82.7944		Cima4b_ol21	41.5877
Cima1_ol19	41.5019	0.0374	39.4367	0.2101	0.0149	0.26	17.8189	0.1739	99.4539	80.5893		Cima2_ol27	43.3202	0.0178	40.3406	0.2494	0.0246	0.2367	16.1791	0.1972	100.566	82.6777		Cima3_ol34	45.906	0.0319	39.9641	0.2499	0.0352	0.1805	12.8313	0.2137	99.4125	86.4451		Cima4a_ol16	38.9309	0.0262	38.968	0.1905	-0.0031	0.3356	21.9442	0.1204	100.513	75.9758		Cima4b_ol21	41.7853
Cima1_ol19	40.898	0.0331	39.4751	0.2109	0.0239	0.2759	18.315	0.1718	99.4038	79.9219		Cima2_ol27	44.5303	0.0402	40.4273	0.2364	0.0136	0.2302	14.9815	0.2332	100.693	84.1233		Cima3_ol34	45.8984	0.0413	39.9018	0.2501	0.0305	0.2146	12.5655	0.2076	99.1097	86.6867		Cima4a_ol17	41.3572	0.0345	39.4632	0.2168	0.022	0.2349	18.5888	0.1501	100.067	79.8631		Cima4b_ol21	39.2829
Cima1_ol19	40.6322	0.0331	39.2065	0.2156	0.0152	0.2439	18.5294	0.1663	99.0421	79.629		Cima2_ol27	43.3942	0.0453	40.3343	0.2425	0.0219	0.2452	16.1775	0.226	100.687	82.7036		Cima3_ol34	45.8572	0.0263	39.8336	0.246	0.0393	0.1632	12.6329	0.2226	99.0212	86.6146		Cima4a_ol17	41.4778	0.0132	39.4841	0.2286	0.0159	0.2475	18.8116	0.1337	100.412	79.7177		Cima4b_ol22	38.0589
Cima1_ol19	36.2491	0.0479	38.2906	0.3307	0.0075	0.5264	23.8559	0.0945	99.4026	73.0359		Cima2_ol27	44.418	0.0304	40.2041	0.2371	0.0249	0.2114	14.9337	0.2374	100.297	84.1323		Cima3_ol34	45.7799	0.0317	40.0143	0.2394	0.0402	0.1788	12.9589	0.2188	99.462	86.2964		Cima4a_ol17	41.1943	0.0356	39.3887	0.2159	0.0189	0.2669	18.7627	0.1169	100	79.6487		Cima4b_ol22	42.2829
Cima1_ol20	38.9726	0.0205	38.9239	0.2337	0.0175	0.3178	20.8433	0.1304	99.4597	76.9214		Cima2_ol27	44.4833	0.0541	40.4298	0.2432	0.0135	0.1613	15.0382	0.2278	100.651	84.0584		Cima3_ol34	44.7792	0.036	40.0458	0.2372	0.0241	0.1876	14.0811	0.1907	99.5816	85.0046		Cima4a_ol17	40.6214	0.0326	39.5115	0.2174	0.0124	0.2328	19.8359	0.1266	100.591	78.4971		Cima4b_ol22	43.4769
Cima1_ol20	36.8783	0.0163	38.7069	0.3737	0.0061	0.4491	23.0547	0.0854	99.5705	74.0355		Cima2_ol27	44.1341	0.039	40.2264	0.2442	0.015	0.2142	15.5322	0.2073	100.612	83.5123		Cima3_ol34	42.7127	0.0576	39.3632	0.2405	0.0249	0.263	16.5913	0.1431	99.3964	82.108		Cima4a_ol17	38.6228	0.0315	38.8996	0.2174	0.0004	0.3315	22.2093	0.1051	100.418	75.6096		Cima4b_ol22	43.6954
Cima1_ol20	34.7617	0.011	38.0323	0.1181	-0.0054	0.353	26.1573	0.1253	99.5534	70.3172		Cima2_ol27	42.0635	0.0302	39.8541	0.2262	0.008	0.2734	18.3507	0.1692	100.975	80.3384		Cima3_ol34	38.1343	0.0208	38.0579	0.31	0.0119	0.347	22.399	0.0945	99.3753	75.216		Cima4a_ol17	41.1777	0.03	39.5632	0.2183	0.007	0.2349	18.8755	0.1456	100.252	79.545		Cima4b_ol22	42.7206
Cima1_ol20	33.5865	0.0121	37.684	0.0896	-0.0031	0.4424	27.7756	0.111	99.6981	68.3095		Cima2_ol27	32.8712	0.5622	38.2518	0.4395	0.0088	0.4493	26.6913	0.0709	99.3449	68.7042		Cima3_ol39	42.4087	0.0383	39.2725	0.2506	0.0058	0.2244	17.3252	0.0667	99.5922	81.3552		Cima4a_ol17	41.519	0.0243	39.7194	0.2141	0.0029	0.2439	18.7033	0.1492	100.576	79.8271		Cima4b_ol22	41.3823
Cima1_ol20	33.2525	0.0153	37.7866	0.0781	0.0057	0.3761	28.0525	0.112	99.6787	67.8768		Cima2_ol28	36.0947	0.0146	38.2515	0.3558	0.0092	0.4556	25.4362	0.0873	100.705	71.6677		Cima3_ol39	40.9074	0.0346	39.4732	0.2525	0.015	0.2656	19.3809	0.0838	100.413	79.0027		Cima4a_ol17	40.8618	0.032	39.6382	0.2151	0.0077	0.2507	19.2809	0.1297	100.416	79.0699		Cima4b_ol22	40.8464
Cima1_ol20	33.1023	0.0074	37.6543	0.0837	-0.0076	0.39	28.1299	0.1078	99.4679	67.7178		Cima2_ol28	45.7584	0.0505	40.5764	0.2499	0.0508	0.1973	13.0522	0.3246	100.26	86.2058		Cima3_ol39	42.6563	0.0477	39.5634	0.2571	-0.0031	0.2315	17.4803	0.0347	100.268	81.3082		Cima4a_ol18	40.564	0.0484	39.4846	0.2246	0.0056	0.2512	19.8678	0.0724	100.519	78.446		Cima4b_ol22	40.8785
Cima1_ol20	33.1965	0.0107	37.899	0.0778	0.0118	0.4276	28.3307	0.1132	100.067	67.6244		Cima2_ol28	46.1639	0.0484	40.6381	0.2394	0.058	0.1701	12.872	0.3546	100.544	86.4737		Cima3_ol39	41.7838	0.0416	39.699	0.2544	0.0178	0.2426	18.0703	0.0932	100.203	80.4759		Cima4a_ol18	39.7194	0.0421	39.2378	0.2266	0.0039	0.2445	20.8406	0.0894	100.404	77.259		Cima4b_ol22	39.0195
Cima1_ol20	32.9908	0.009	37.6542	0.0827	0.0024	0.3763	28.1589	0.1086	99.3828	67.6214		Cima2_ol28	46.0952	0.0351	40.8333	0.2473	0.0394	0.166	12.9664	0.3489	100.732	86.3704		Cima3_ol39	42.5044	0.0485	39.7082	0.243	-0.0035	0.234	17.7227	0.032	100.489	81.0434		Cima4a_ol18	38.5147	0.039	38.9186	0.2228	0.0046	0.3388	22.189	0.0874	100.315	75.5747		Cima4b_ol22	35.8172
Cima1_ol20	33.0116	0.0211	37.6313	0.0841	0.0118	0.3809	28.2204	0.1166	99.4778	67.5874		Cima2_ol28	46.1481	0.0401	40.7732	0.2463	0.0435	0.164	13.1656	0.3328	100.913	86.2038		Cima3_ol39	42.8881	0.0346	39.7529	0.2354	0.0231	0.2094	17.2801	0.1102	100.534	81.5643		Cima4a_ol18	38.2683	0.0486	38.9468	0.2225	0.0044	0.3507	22.6446	0.0925	100.578	75.0779		Cima4b_ol23	37.3742
Cima1_ol20	33.2968	0.0125	37.7552	0.0775	0.0025	0.4256	28.4773	0.1083	100.156	67.5774		Cima2_ol28	44.2269	0.0377	40.3065	0.2409	0.0423	0.2072	15.5441	0.2966	100.902	83.5306		Cima3_ol42	34.3354	0.0232	37.7281	0.4388	0.0111	0.4481	26.4266	0.0608	99.4721	69.8436		Cima4a_ol18	37.5283	0.0267	38.6639	0.2234	0.0055	0.3461	23.4797	0.0779	100.352	74.0202		Cima4b_ol23	41.6581
Cima1_ol22	39.9062	0.0255	39.4674	0.2274	0.0151	0.2769	19.152	0.1454	99.2158	78.788		Cima2_ol29	33.6615	0.0361	38.0278	0.3726	-0.0013	0.4732	28.1792	0.0723	100.821	68.0448		Cima3_ol42	42.0245	0.0305	37.8487	0.2881	0.0113	0.2901	19.1407	0.1207	99.7546	79.6491		Cima4a_ol18	37.4237	0.0348	38.6908	0.2354	0.0006	0.3409	23.5999	0.0898	100.416	73.8681		Cima4b_ol23	41.9727
Cima1_ol22	39.9944	0.0498	39.325	0.2293	-0.0032	0.2583	19.2608	0.0806	99.1949	78.7302		Cima2_ol29	41.3892	0.0343	39.7422	0.2249	0.0214	0.2776	18.9781	0.1819	100.85	79.5401		Cima3_ol42	42.3926	0.0249	39.3097	0.2505	0.0127	0.2476	17.2725	0.117	99.6275	81.3956		Cima4a_ol18	39.0927	0.053	38.9901	0.2381	0.0109	0.2905	21.7381	0.0833	100.497	76.2228		Cima4b_ol23	41.607
Cima1_ol22	40.134	0.0327	39.3515	0.2285	0.0063	0.3068	19.4819	0.1148	99.6566	78.5969		Cima2_ol29	43.5981	0.0308	40.1022	0.2373	0.0381	0.2406	16.0325	0.2521	100.532	82.8987		Cima3_ol42	42.7241	0.0315	39.4391	0.2465	0.0074	0.2214	17.0705	0.1033	99.8438	81.6898		Cima4a_ol18	39.6599	0.0411	39.1738	0.2304	0.0156	0.2317	20.6674	0.0932	100.113	77.3791		Cima4b_ol23	41.8636
Cima1_ol22	40.2228	0.0565	39.3836	0.2488	0.0099	0.2908	19.603	0.0894	99.9047	78.5299		Cima2_ol29	44.8946	0.0342	40.4766	0.241	0.0448	0.2014	14.3485	0.3149	100.556	84.7966		Cima3_ol42	42.5158	0.0221	39.3818	0.262	0.0086	0.2241	17.2886	0.0934	99.7964	81.4255		Cima4a_ol19	36.1774	0.0168	38.5329	0.2535	0.0085	0.3883	24.9806	0.0855	100.443	72.0793		Cima4b_ol23	42.2054
Cima1_ol22	39.9471	0.0328	39.4496	0.2335	0.0249	0.2937	19.5337	0.1476	99.6629	78.4736		Cima2_ol29	45.3691	0.0361	40.4695	0.2426	0.0408	0.2023	14.0244	0.3275	100.712	85.2217		Cima3_ol42	42.5145	0.043	39.6799	0.2604	0.0124	0.207	17.1573	0.0812	99.9558	81.54		Cima4a_ol19	41.2877	0.0177	39.6941	0.2088	0.0255	0.241	19.0445	0.1365	100.656	79.4431		Cima4b_ol23	41.9062
Cima1_ol22	39.8436	0.0304	39.2417	0.2693	0.0259	0.2831	19.7881	0.1036	99.5856	78.2101		Cima2_ol29	45.17	0.0235	40.6184	0.2271	0.0565	0.21	13.7459	0.3252	100.377	85.4178		Cima3_ol42	42.7274	0.039	39.4089	0.2684	0.0133	0.2122	17.1591	0.1029	99.9311	81.6134		Cima4a_ol19	41.5225	0.0253	39.654	0.2124	0.0192	0.2628	18.3357	0.1426	100.174	80.146		Cima4b_ol23	41.5746
Cima1_ol22	38.2995	0.0308	39.162	0.2997	0.0074	0.357	21.4414	0.099	99.6968	76.1003		Cima2_ol29	45.0292	0.0354	40.7913	0.2422	0.0503	0.1876	14.1858	0.3216	100.843	84.9813		Cima3_ol42	42.5589	0.0287	39.1903	0.2443	0.0145	0.2037	16.8458	0.1276	99.2138	81.8298		Cima4a_ol19	41.6766	0.0287	39.8432	0.2187	0.0095	0.2352	18.2961	0.1496	100.458	80.2393		Cima4b_ol23	38.8867
Cima1_ol22	32.599	4.4963	43.4201	1.1789	0.0055	0.2828	18.8957	0.0705	100.949	75.4621		Cima2_ol29	42.9105	0.1399	40.4353	0.2483	0.0405	0.1896	15.7932	0.2794	100.037	82.8865		Cima3_ol42	41.3579	0.0271	39.0535	0.2507	0.0183	0.2751	18.5817	0.1167	99.681	79.8694		Cima4a_ol19	41.7635	0.0295	39.8463	0.2185	0.0117	0.2577	18.1237	0.141	100.392	80.4217		Cima4b_ol24	35.6269
Cima1_ol22	36.0081	0.035	38.5685	0.3443	0.0023	0.4847	23.6021	0.0584	99.1035	73.1152		Cima2_ol29	38.8324	0.05	39.2937	0.2823	0.0147	0.337	21.5007	0.1789	100.49	76.3007		Cima3_ol42	37.379	0.0179	38.4915	0.3416	0.02	0.3707	23.2039	0.0767	99.9014	74.1705		Cima4a_ol19	41.7446	0.0406	39.7261	0.2159	0.0117	0.2521	18.3461	0.1339	100.471	80.2217		Cima4b_ol24	38.8769
Cima1_ol23	41.7488	0.0418	39.6774	0.2346	0.0018	0.2202	18.0201	0.0753	100.02	80.5063		Cima2_ol30	37.5641	0.0281	38.7234	0.2486	0.0058	0.4034	23.4661	0.1113	100.551	74.0498		Cima3_ol43	43.3792	0.038	39.3657	0.2419	0.0408	0.2329	15.7537	0.16	99.2123	83.0752		Cima4a_ol19	40.4741	0.0263	39.4554	0.2243	0.018	0.3026	19.7502	0.1372	100.388	78.5087		Cima4b_ol24	41.051
Cima1_ol23	41.3039	0.022	39.7692	0.2142	0.015	0.2284	18.2567	0.1597	99.9691	80.1308		Cima2_ol30	41.115	0.049	39.5279	0.2323	0.0124	0.2697	18.8118	0.164	100.182	79.5753		Cima3_ol43	44.6572	0.0338	39.9515	0.2358	0.0265	0.1842	14.3442	0.1875	99.6208	84.732		Cima4a_ol19	37.6765	0.0258	38.7578	0.2643	0.0128	0.3645	23.5767	0.1003	100.779	74.0168		Cima4b_ol24	41.7562
Cima1_ol23	40.8364	0.0361	39.6034	0.2067	0.0158	0.2689	18.6686	0.1467	99.7826	79.589		Cima2_ol30	43.3347	0.027	40.3356	0.2363	0.0186	0.2593	16.47	0.1879	100.869	82.4259		Cima3_ol43	45.1375	0.04	39.8543	0.2301	0.0237	0.2269	13.7895	0.1841	99.4862	85.3695		Cima4a_ol19	34.7721	0.0164	38.0487	0.4573	-0.0001	0.4598	26.8044	0.0763	100.635	69.8109		Cima4b_ol24	42.3081
Cima1_ol23	40.5756	0.0147	39.5021	0.2232	0.0149	0.2714	19.184	0.1568	99.9427	79.037		Cima2_ol30	43.9695	0.0595	40.3589	0.2439	0.0138	0.2021	15.896	0.2127	100.956	83.1387		Cima3_ol43	45.343	0.0444	40.025	0.2353	0.0273	0.2078	13.7259	0.1829	99.7916	85.4834		Cima4a_ol20	34.1656	0.0227	38.0735	0.3557	-0.0017	0.4648	27.2755	0.0658	100.422	69.0679		Cima4b_ol24	42.746
Cima1_ol23	39.8751	0.0471	39.1335	0.2494	0.0048	0.3337	20.163	0.0801	99.8867	77.902		Cima2_ol30	43.7382	0.0593	40.3283	0.2342	0.0172	0.2374	15.8264	0.1845	100.626	83.1263		Cima3_ol43	45.1911	0.0437	39.9849	0.2465	0.039	0.2068	13.8271	0.1958	99.7349	85.3501		Cima4a_ol20	40.4793	0.0387	39.2841	0.224	0.0093	0.2671	19.4619	0.1412	99.9057	78.758		Cima4b_ol24	42.2841
Cima1_ol23	39.1768	0.0251	39.2335	0.2647	0.0035	0.3383	21.018	0.1154	100.175	76.8662		Cima2_ol30	43.462	0.0404	40.0878	0.2295	0.0121	0.2272	16.4268	0.1981	100.684	82.5064		Cima3_ol43	44.6815	0.0408	39.8766	0.2537	0.0178	0.2236	14.1643	0.1892	99.4475	84.9014		Cima4a_ol20	41.8217	0.0378	39.8127	0.212	0.0167	0.2661	17.7116	0.1561	100.035	80.8032		Cima4b_ol24	40.28
Cima1_ol23	36.5814	0.6151	38.9782	0.3287	0.0029	0.5126	23.5512	0.0748	100.645	73.4666		Cima2_ol30	42.8928	0.0338	40.0045	0.227	0.0147	0.2333	17.1623	0.1808	100.749	81.6686		Cima3_ol43	43.7971	0.0428	39.7715	0.2593	0.0189	0.1842	15.9856	0.1559	100.215	83.0046		Cima4a_ol20	42.7772	0.0364	40.0573	0.2195	0.0278	0.2108	16.8688	0.1738	100.372	81.8853		Cima4b_ol24	37.4563
Cima1_ol24	45.152	0.0419	41.0486	0.2419	0.0344	0.1564	13.1298	0.3205	100.126	85.9749		Cima2_ol30	42.2656	0.0347	39.9211	0.2258	0.0101	0.2695	18.0703	0.1709	100.968	80.6554		Cima3_ol43	44.7288	0.0263	40.0593	0.2382	0.0333	0.1901	14.5243	0.1849	99.9852	84.5908		Cima4a_ol20	43.4367	0.0333	40.121	0.2249	0.0305	0.2098	15.9038	0.2059	100.166	82.9603		Cima4b_ol25	39.6218
Cima1_ol24	45.3764	0.0508	40.5809	0.2496	0.0438	0.1951	13.2571	0.2909	100.045	85.9184		Cima2_ol31	38.1813	0.0214	39.0707	0.2405	0.0124	0.3471	22.832	0.1365	100.842	74.8805		Cima3_ol43	43.6576	0.0413	39.595	0.2481	0.0319	0.2164	16.2319	0.1579	100.18	82.7421		Cima4a_ol20	44.5138	0.0413	40.2942	0.2211	0.0309	0.181	15.4893	0.2047	100.976	83.6678		Cima4b_ol25	42.0782
Cima1_ol24	45.0603	0.0352	40.4553	0.2417	0.0411	0.1656	13.3833	0.2896	99.6719	85.7181		Cima2_ol31	41.8421	0.0559	39.8114	0.2501	0.0153	0.2793	18.5712	0.1106	100.936	80.065		Cima3_ol44	45.1616	0.0354	40.0539	0.2309	0.0264	0.1886	13.5352	0.2115	99.4435	85.6069		Cima4a_ol20	44.192	0.0375	40.2694	0.22	0.0269	0.2024	15.2839	0.2087	100.441	83.7509		Cima4b_ol25	42.2152
Cima1_ol24	44.6052	0.0332	40.2913	0.2459	0.0378	0.2034	13.5602	0.2952	99.2721	85.4305		Cima2_ol32	34.5012	0.0258	38.1622	0.3403	0.0033	0.4899	27.3532	0.0816	100.957	69.2158		Cima3_ol44	43.2446	0.0295	39.5083	0.2556	0.0321	0.1988	15.6531	0.1533	99.0752	83.1215		Cima4a_ol20	43.6739	0.0306	40.2998	0.2193	0.0152	0.2123	15.993	0.202	100.646	82.9581		Cima4b_ol25	42.3338
Cima1_ol24	44.5159	0.0389	40.3472	0.2741	0.0278	0.1966	14.2664	0.197	99.864	84.7612		Cima2_ol32	41.5089	0.0442	39.5059	0.2446	0.0095	0.2409	19.2501	0.1324	100.936	79.3549		Cima3_ol48	29.1166	0.0289	35.9496	0.4515	0.0151	0.5929	33.7018	0.0381	99.8944	60.631		Cima4a_ol21	32.8369	0.7209	38.3957	0.7086	0.0077	0.4501	26.8445	0.0614	100.026	68.5586		Cima4b_ol25	41.3681
Cima1_ol24	43.7389	0.0621	40.0196	0.2219	0.0401	0.2068	14.9033	0.2524	99.4452	83.9528		Cima2_ol32	42.5523	0.0507	40.0315	0.2283	0.0127	0.2064	17.6508	0.1819	100.915	81.1228		Cima3_ol48	42.7283	0.0346	39.1951	0.2464	0.0222	0.2676	16.5877	0.1423	99.2242	82.1164		Cima4a_ol21	34.6298	0.0183	37.9644	0.2784	-0.0003	0.4771	26.8753	0.0584	100.301	69.6688		Cima4b_ol25	41.5951
Cima1_ol24	41.9265	0.0351	39.5812	0.1958	0.0176	0.2562	17.6673	0.162	99.8416	80.8807		Cima2_ol32	42.579	0.0505	39.8499	0.2284	0.0122	0.2383	17.6752	0.176	100.809	81.1114		Cima3_ol48	44.5266	0.0424	39.5535	0.2459	0.0246	0.2107	14.499	0.1858	99.2885	84.5545		Cima4a_ol21	34.8604	0.0181	38.3087	0.2651	-0.0042	0.5336	26.6851	0.0692	100.736	69.9582		Cima4b_ol25	41.7411
Cima1_ol24	40.3889	0.0356	39.1689	0.2144	0.0158	0.3006	19.4457	0.1597	99.7294	78.7345		Cima2_ol32	41.4656	0.0325	39.6229	0.2307	-0.0067	0.189	18.6417	0.1301	100.306	79.8594		Cima3_ol48	45.1958	0.0464	39.7705	0.2303	0.0333	0.1721	13.466	0.2023	99.1166	85.6791		Cima4a_ol21	34.5478	0.0218	37.8914	0.2771	0.0047	0.4686	26.7267	0.0722	100.01	69.7356		Cima4b_ol25	41.7606
Cima1_ol24	36.6149	0.0249	38.5749	0.3536	0.0118	0.4794	23.4941	0.0747	99.6282	73.5319		Cima2_ol32	40.5875	0.0384	39.6012	0.234	0.0156	0.2798	19.7959	0.1335	100.686	78.5169		Cima3_ol48	45.554	0.0366	39.8727	0.2358	0.0401	0.1935	13.3879	0.2094	99.5299	85.8466		Cima4a_ol21	34.7948	0.0345	38.1316	0.2693	0.0094	0.4932	27.0691	0.0625	100.864	69.6173		Cima4b_ol25	41.0213
Cima1_ol25	42.948	0.0547	39.8863	0.212	0.01	0.1855	16.1197	0.1732	99.5895	82.6069		Cima2_ol33	43.5578	0.0414	40.1232	0.221	0.0471	0.2062	16.0937	0.2762	100.566	82.8314		Cima3_ol48	44.2236	0.0426	39.7177	0.2267	0.0285	0.2236	14.9345	0.1799	99.5771	84.0726		Cima4a_ol21	34.7126	0.0282	38.0063	0.2781	0.0032	0.4737	26.9135	0.0632	100.479	69.6892		Cima4b_ol25	37.3442
Cima1_ol25	42.7936	0.0431	39.8096	0.2153	0.0056	0.2277	16.1584	0.1708	99.4242	82.5205		Cima2_ol33	45.1065	0.0489	40.6004	0.2583	0.0428	0.2148	14.2395	0.3297	100.841	84.955		Cima3_ol48	43.0959	0.0347	39.0479	0.2568	0.0216	0.2126	16.5311	0.1623	99.363	82.2919		Cima4a_ol21	34.8258	0.0306	38.0715	0.2581	-0.0035	0.4531	26.6133	0.0727	100.322	69.994		Cima4b_ol26	41.6344
Cima1_ol25	42.7741	0.0329	39.906	0.2104	0.0107	0.2057	16.4015	0.176	99.7173	82.2971		Cima2_ol33	45.4825	0.0286	40.8277	0.2474	0.0513	0.2054	13.6096	0.3398	100.792	85.6266		Cima3_ol48	44.4908	0.0353	40.1602	0.2361	0.0224	0.1691	14.6526	0.186	99.9525	84.4057		Cima4a_ol21	34.9304	0.0292	37.9649	0.2625	-0.0071	0.4452	26.5457	0.0693	100.24	70.1103		Cima4b_ol26	43.8874
Cima1_ol25	42.7407	0.0539	39.9198	0.2104	0.0074	0.2065	16.6152	0.1644	99.9183	82.0964		Cima2_ol33	45.041	0.0715	40.6804	0.2626	0.048	0.1708	14.2878	0.3121	100.874	84.8931		Cima3_ol48	44.6268	0.0267	39.7892	0.2466	0.0286	0.2333	14.6482	0.1959	99.7954	84.4498		Cima4a_ol21	34.7542	0.0248	38.1262	0.2736	-0.0025	0.4585	26.7177	0.0654	100.418	69.8685		Cima4b_ol26	43.9948
Cima1_ol25	42.4617	0.037	39.7902	0.2084	0.0128	0.2194	16.544	0.1757	99.4493	82.0633		Cima2_ol33	41.3544	0.3158	41.1605	0.2468	0.0323	0.2368	17.1955	0.245	100.787	81.0856		Cima3_ol48	41.6645	0.0398	38.9595	0.2434	0.0112	0.2981	18.218	0.1194	99.5538	80.3025		Cima4a_ol21	34.8285	0.0388	38.1115	0.3068	-0.0037	0.4833	26.5279	0.0596	100.353	70.063		Cima4b_ol26	44.1024
Cima1_ol25	42.0661	0.03	39.6093	0.2182	0.0206	0.2345	16.7515	0.1853	99.1155	81.7398		Cima2_ol34	39.1472	0.0329	39.3701	0.2258	0.0123	0.3954	21.5071	0.142	100.833	76.441		Cima3_ol52	41.4612	0.2518	39.3616	0.3106	0.0252	0.2895	17.8892	0.1404	99.7294	80.5124		Cima4a_ol22	38.4566	0.032	38.8763	0.2262	0.0139	0.3453	22.3527	0.1273	100.43	75.4108		Cima4b_ol26	43.9333
Cima1_ol25	42.1033	0.0391	39.7397	0.2083	0.0056	0.2365	17.0598	0.1778	99.5702	81.4794		Cima2_ol34	42.0661	0.0312	39.8811	0.2259	0.011	0.2691	18.292	0.1501	100.927	80.3898		Cima3_ol52	43.125	0.0301	39.4715	0.2456	0.0335	0.2138	16.4536	0.1503	99.7233	82.37		Cima4a_ol22	43.1986	0.0366	39.981	0.2146	0.0096	0.244	16.4637	0.1737	100.322	82.3859		Cima4b_ol26	43.9545
Cima1_ol25	40.1591	0.0251	39.36	0.2271	-0.0007	0.2963	19.5184	0.1487	99.7339	78.576		Cima2_ol35	45.1833	0.0392	40.4358	0.2625	0.0214	0.1828	14.1888	0.2451	100.559	85.0221		Cima3_ol52	43.6464	0.0389	39.6399	0.2528	0.0211	0.238	15.8051	0.1522	99.7944	83.1157		Cima4a_ol22	44.1651	0.0318	40.1524	0.2374	0.0176	0.2028	15.4166	0.1767	100.4	83.6245		Cima4b_ol26	43.4817
Cima1_ol25	36.9817	0.0164	38.5907	0.3109	0.0052	0.4728	22.6175	0.0865	99.0817	74.4551		Cima2_ol35	45.0101	0.044	40.6878	0.2436	0.017	0.2022	14.4761	0.2501	100.931	84.7156		Cima3_ol52	43.3909	0.0394	39.4851	0.2489	0.0177	0.2737	15.9709	0.1497	99.5763	82.8858		Cima4a_ol22	44.2255	0.0402	40.3106	0.2266	0.0259	0.2055	15.1512	0.2137	100.399	83.8795		Cima4b_ol26	43.9594
Cima1_ol25	36.7382	0.0303	38.6167	0.301	-0.0019	0.4907	23.3899	0.0671	99.6319	73.6834		Cima2_ol35	44.6083	0.0425	40.567	0.2469	0.0165	0.1923	14.8274	0.2316	100.733	84.284		Cima3_ol52	43.3382	0.0421	39.6353	0.2411	0.0301	0.2158	16.0892	0.1482	99.74	82.7634		Cima4a_ol22	44.4911	0.0559	40.5494	0.321	0.0333	0.178	14.5234	0.2269	100.379	84.5219		Cima4b_ol26	43.733
Cima1_ol26	42.8325	0.0404	40.1319	0.1908	0.012	0.233	16.3716	0.1693	99.9814	82.3437		Cima2_ol36	41.8393	0.0298	39.6864	0.2359	0	0.242	18.5699	0.1087	100.712	80.065		Cima3_ol52	43.1641	0.0294	39.365	0.2433	0.0211	0.2412	16.3592	0.1521	99.5754	82.4667		Cima4a_ol22	44.0049	0.0549	40.2761	0.2374	0.0243	0.2115	15.2707	0.2052	100.285	83.7048		Cima4b_ol26	42.2671
Cima1_ol26	42.6286	0.0424	39.8095	0.195	0.0051	0.2133	16.4271	0.1732	99.4942	82.225		Cima2_ol36	41.9848	0.0297	39.8555	0.2338	0.0052	0.2478	18.4891	0.113	100.959	80.1896		Cima3_ol52	42.915	0.0269	39.7083	0.2389	0.0304	0.2396	16.6418	0.1377	99.9386	82.1327		Cima4a_ol22	43.6724	0.044	40.0692	0.3173	0.0129	0.1727	15.5526	0.1835	100.025	83.3487		Cima4b_ol27	35.5101
Cima1_ol26	42.5273	0.0437	39.9296	0.2066	0.009	0.2092	16.5936	0.1656	99.6847	82.0419		Cima2_ol36	41.4829	0.0351	39.4692	0.2366	0.0076	0.2754	18.8493	0.1423	100.498	79.6875		Cima3_ol52	42.5383	0.0402	39.5068	0.2334	0.0146	0.2465	17.2169	0.1438	99.9405	81.4961		Cima4a_ol22	38.2848	0.0406	38.9284	0.2393	0.0177	0.3167	22.6049	0.1173	100.55	75.1185		Cima4b_ol27	34.5946
Cima1_ol26	42.207	0.0531	39.6414	0.2056	0.013	0.2561	16.5276	0.1875	99.0912	81.9892		Cima2_ol38	43.4225	0.0239	40.259	0.2489	0.044	0.2256	16.4428	0.2733	100.94	82.4793		Cima3_ol52	40.1854	0.1361	39.064	0.2692	0.0278	0.2901	19.067	0.1185	99.1582	78.9782		Cima4a_ol23	40.1324	0.0383	39.3404	0.2103	0.0021	0.2418	20.714	0.0645	100.744	77.5467		Cima4b_ol27	36.8226
Cima1_ol26	42.2303	0.0625	39.7589	0.2166	0.008	0.2161	16.7413	0.1558	99.3895	81.8069		Cima2_ol38	44.4633	0.0287	40.4106	0.2385	0.0369	0.2124	14.8716	0.2958	100.558	84.2011		Cima3_ol54	43.9352	0.0226	39.8121	0.2611	0.0296	0.2341	15.2969	0.1841	99.7757	83.6597		Cima4a_ol23	40.0633	0.0279	39.2954	0.199	-0.0016	0.2338	20.4779	0.0569	100.353	77.7157		Cima4b_ol27	35.2856
Cima1_ol26	42.1865	0.042	39.6724	0.2176	0.0272	0.2441	16.7326	0.1831	99.3056	81.7994		Cima2_ol38	41.935	0.0377	39.787	0.2348	0.0312	0.2836	18.3535	0.246	100.909	80.2876		Cima3_ol54	42.2241	0.0225	39.389	0.2611	0.0272	0.246	17.4044	0.1545	99.7288	81.2194		Cima4a_ol23	40.1207	0.0449	39.2421	0.1979	0.0025	0.2378	20.5038	0.06	100.41	77.7187		Cima4b_ol27	37.4836
Cima1_ol26	41.2733	0.1226	40.1284	0.228	0.0136	0.2945	18.0712	0.1749	100.307	80.2811		Cima2_ol38	39.7466	0.0387	39.4402	0.2616	0.0327	0.3566	20.8609	0.2125	100.95	77.2541		Cima3_ol54	45.7335	0.0373	40.1984	0.2556	0.0402	0.1864	13.3759	0.1967	100.024	85.9053		Cima4a_ol23	40.0174	0.0395	39.1229	0.2054	-0.0002	0.2568	20.5541	0.059	100.255	77.6315		Cima4b_ol27	37.2249
Cima1_ol26	40.8678	0.0335	39.5491	0.2089	0.0178	0.2602	18.0855	0.1663	99.1892	80.1117		Cima2_ol39	38.867	0.1612	39.2431	0.2528	0.0124	0.3301	21.5642	0.1664	100.597	76.2634		Cima3_ol54	45.9485	0.0414	40.0955	0.2474	0.0264	0.225	12.9792	0.2029	99.7664	86.3213		Cima4a_ol23	39.9602	0.0346	39.2455	0.202	-0.0026	0.2845	20.267	0.0519	100.043	77.8503		Cima4b_ol27	37.4546
Cima1_ol26	38.5703	0.0493	38.9181	0.2656	0.0148	0.358	21.0642	0.1226	99.3628	76.5481		Cima2_ol39	41.9156	0.031	40.1093	0.2417	0.0442	0.2973	17.974	0.2824	100.896	80.6089		Cima3_ol54	45.7131	0.0509	40.229	0.2475	0.0335	0.1835	13.1548	0.2109	99.8232	86.1005		Cima4a_ol23	40.0433	0.0512	39.2465	0.2012	-0.0022	0.2057	20.6349	0.0436	100.424	77.5744		Cima4b_ol27	37.1767
Cima1_ol26	37.8276	0.0189	38.7925	0.2978	0.0037	0.3815	22.3289	0.1023	99.7533	75.1237		Cima2_ol40	37.8644	0.0304	38.8077	0.2396	0.0032	0.3785	23.4263	0.1252	100.875	74.2351		Cima3_ol54	45.5962	0.0259	40.1039	0.2311	0.0375	0.1937	13.1997	0.2168	99.6047	86.0288		Cima4a_ol23	39.8431	0.0289	39.1374	0.2006	0.0029	0.2629	20.4742	0.0368	99.9868	77.6233		Cima4b_ol27	36.6588
Cima1_ol27	40.6051	0.036	39.587	0.209	0.0109	0.2848	18.7988	0.1518	99.6834	79.3829		Cima2_ol40	39.4426	0.0259	39.197	0.2251	0.0147	0.3357	21.5879	0.1412	100.97	76.5086		Cima3_ol54	43.9777	0.0447	39.8357	0.2347	0.026	0.2278	15.2717	0.1981	99.8164	83.6955		Cima4a_ol23	39.7847	0.0361	39.2121	0.2151	-0.0051	0.2465	20.8762	0.0442	100.41	77.2579		Cima4b_ol28	35.9197
Cima1_ol27	40.3656	0.0266	39.345	0.2295	0.0199	0.3219	19.1533	0.1559	99.6177	78.9776		Cima2_ol40	40.2879	0.0151	39.4522	0.222	0.0058	0.2408	19.6791	0.1476	100.05	78.4919		Cima3_ol54	40.704	0.0272	39.25	0.2385	0.0382	0.2616	19.1763	0.1436	99.8394	79.0959		Cima4a_ol24	33.0202	0.0087	37.8583	0.3719	0.0066	0.5312	28.6117	0.0633	100.472	67.2908		Cima4b_ol28	41.3917
Cima1_ol27	40.3049	0.032	39.4114	0.2154	0.0222	0.2964	19.2607	0.1524	99.6954	78.8593		Cima2_ol40	41.7087	0.0303	39.7586	0.222	0.0122	0.254	18.741	0.1551	100.882	79.8679		Cima3_ol54	40.614	0.0327	39.4561	0.2641	0.0159	0.3432	19.5686	0.1242	100.419	78.722		Cima4a_ol24	41.8009	0.0348	39.6434	0.2177	0.0175	0.2523	18.266	0.1532	100.386	80.3124		Cima4b_ol28	40.9843
Cima1_ol27	39.5799	0.5452	40.4614	0.2939	0.0171	0.2777	18.9164	0.1572	100.249	78.8574		Cima2_ol40	42.0395	0.0297	39.8419	0.224	0.0075	0.2527	18.3964	0.1602	100.952	80.29		Cima3_ol57	40.3985	0.025	38.7586	0.2619	0.0117	0.2793	19.5104	0.107	99.3523	78.6827		Cima4a_ol24	42.8877	0.034	39.9902	0.2206	0.0202	0.2066	16.9896	0.1741	100.523	81.8178		Cima4b_ol28	40.9287
Cima1_ol27	40.1415	0.0384	39.4296	0.2104	0.0169	0.2587	19.3849	0.1459	99.6264	78.6838		Cima2_ol40	41.9674	0.0127	39.8604	0.2338	0.0123	0.2677	18.2665	0.1613	100.782	80.3749		Cima3_ol57	42.7982	0.0148	39.4343	0.2354	0.0189	0.2233	16.9508	0.1478	99.8233	81.8209		Cima4a_ol24	42.7315	0.0592	39.5362	0.2314	0.0325	0.2225	16.0777	0.191	99.082	82.5716		Cima4b_ol28	40.9566
Cima1_ol27	40.1245	0.0428	39.2585	0.2577	0.0114	0.2699	19.5568	0.1561	99.6776	78.5284		Cima2_ol41	40.6144	0.0375	39.4711	0.2537	0	0.2498	20.0135	0.0337	100.674	78.3431		Cima3_ol57	44.2719	0.0314	39.4459	0.2737	0.0198	0.1919	16.2194	0.1694	100.623	82.9519		Cima4a_ol24	43.656	0.0357	40.1758	0.2186	0.0299	0.1999	15.6616	0.2101	100.188	83.2465		Cima4b_ol28	41.1504
Cima1_ol27	40.1644	0.0216	39.281	0.2195	0.0137	0.2479	19.5847	0.1432	99.6759	78.5212		Cima2_ol41	41.2785	0.045	39.6415	0.2444	-0.0018	0.2229	19.3919	0.0286	100.851	79.1429		Cima3_ol57	45.7632	0.0376	39.9128	0.2206	0.0374	0.2006	12.8979	0.2195	99.2895	86.3479		Cima4a_ol24	43.6773	0.036	40.3533	0.2345	0.022	0.2059	15.5824	0.2129	100.324	83.3236		Cima4b_ol28	41.0021
Cima1_ol27	39.0875	0.0238	38.9284	0.2757	0.0121	0.3097	20.8947	0.1158	99.6475	76.9303		Cima2_ol41	41.2445	0.042	39.6292	0.2392	-0.0087	0.2303	19.5006	0.0301	100.907	79.0366		Cima3_ol57	45.8355	0.0415	39.9246	0.2343	0.0322	0.1692	12.7616	0.2208	99.2197	86.4909		Cima4a_ol24	43.581	0.0301	40.0752	0.2273	0.027	0.265	15.9994	0.2008	100.406	82.9224		Cima4b_ol28	40.9563
Cima1_ol27	38.351	0.0194	38.8952	0.2333	0.0035	0.3886	21.3613	0.1036	99.3559	76.1926		Cima2_ol41	41.1515	0.0396	39.7283	0.2385	0.0009	0.2252	19.5576	0.0354	100.977	78.9508		Cima3_ol57	45.519	0.0501	40.3694	0.2287	0.0367	0.1882	13.2533	0.2071	99.8525	85.9596		Cima4a_ol24	42.4429	0.0393	40.0197	0.2163	0.0183	0.2398	17.267	0.1662	100.409	81.4183		Cima4b_ol28	41.1511
Cima1_ol27	36.9943	0.025	38.5984	0.3248	0.0073	0.4931	23.1714	0.0693	99.6836	73.9989		Cima2_ol42	46.1288	0.0404	41.0938	0.2396	0.0529	0.1891	12.845	0.3499	100.939	86.4895		Cima3_ol57	43.7717	0.0324	39.6416	0.2347	0.0306	0.2346	15.3987	0.1898	99.5341	83.5177		Cima4a_ol25	34.7497	0.0251	37.9721	0.3746	0.0075	0.4272	26.9281	0.0725	100.557	69.7003		Cima4b_ol28	40.151
Cima1_ol28	41.7162	0.0406	39.7143	0.2128	0.0203	0.2247	17.6372	0.1772	99.7432	80.829		Cima2_ol42	39.2236	0.0215	39.3067	0.2586	0.0185	0.3778	21.5354	0.1521	100.894	76.4524		Cima3_ol59	43.5844	0.038	39.733	0.2428	0.028	0.192	15.5662	0.1822	99.5666	83.3086		Cima4a_ol25	39.9348	0.0348	39.1595	0.2132	0.0084	0.2517	20.6115	0.1129	100.327	77.547		Cima4b_ol29	42.5443
Cima1_ol28	41.433	0.0339	39.5729	0.2113	0.0219	0.2341	17.5532	0.1682	99.2285	80.7976		Cima2_ol43	43.9783	0.0425	40.4455	0.2424	0.0123	0.2481	15.7837	0.1958	100.948	83.2407		Cima3_ol59	45.5158	0.0491	39.7466	0.2321	0.0472	0.1773	13.0879	0.2377	99.0937	86.1096		Cima4a_ol25	40.3107	0.0505	39.2979	0.2118	0.0062	0.2325	19.7128	0.0862	99.9085	78.4724		Cima4b_ol29	44.7517
Cima1_ol28	41.2775	0.0342	39.5769	0.2077	0.0233	0.2518	17.9308	0.1755	99.4777	80.4059		Cima2_ol43	43.7776	0.0287	40.4749	0.2294	0.0134	0.2169	15.8197	0.2012	100.762	83.1449		Cima3_ol59	43.8138	0.0461	39.3177	0.2399	0.03	0.1994	15.363	0.1889	99.1989	83.5628		Cima4a_ol25	39.4959	0.0477	39.1946	0.2167	-0.0001	0.2589	21.0441	0.0896	100.347	76.9883		Cima4b_ol29	44.7358
Cima1_ol28	41.2689	0.0439	39.6011	0.2262	0.0194	0.2486	18.1121	0.1606	99.6808	80.2435		Cima2_ol43	43.8148	0.05	40.3701	0.234	0.0228	0.1915	15.9155	0.2104	100.809	83.0721		Cima3_ol60	36.248	0.0156	37.8505	0.3224	0.0027	0.3712	24.452	0.0771	99.3394	72.5466		Cima4a_ol25	40.3353	0.0428	39.2628	0.232	0.0093	0.2794	20.0563	0.0955	100.313	78.1896		Cima4b_ol29	44.6931
Cima1_ol28	40.194	0.0363	39.3159	0.2093	0.0111	0.2871	19.0739	0.1542	99.2819	78.9757		Cima2_ol43	43.597	0.0436	40.2605	0.2497	0.0171	0.2292	16.2526	0.2075	100.857	82.7042		Cima3_ol60	38.7783	0.0233	38.2597	0.2521	0.0163	0.3158	21.5342	0.112	99.2917	76.2472		Cima4a_ol25	39.3657	0.0341	39.1023	0.2362	0.0047	0.3027	21.0118	0.0974	100.155	76.9569		Cima4b_ol29	44.2266
Cima1_ol28	40.2717	0.0298	39.3009	0.2187	0.0072	0.2955	19.6308	0.1495	99.9039	78.5263		Cima2_ol44	30.4592	0.899	37.8575	0.4504	-0.0018	0.5647	29.2607	0.0614	99.5512	64.9811		Cima3_ol60	45.6203	0.0436	39.9916	0.2419	0.0306	0.1985	13.1378	0.2114	99.4757	86.0916		Cima4a_ol25	38.2505	0.0353	38.7919	0.2537	-0.0006	0.3054	22.651	0.1092	100.396	75.0638		Cima4b_ol29	43.1078
Cima1_ol28	39.4566	0.022	39.1539	0.2305	0.0238	0.3269	20.295	0.1314	99.64	77.6068		Cima2_ol44	40.6127	0.1185	39.6114	0.226	0.018	0.3055	19.7318	0.1652	100.789	78.5821		Cima3_ol60	45.1887	0.042	39.9105	0.2478	0.0428	0.1918	13.6843	0.2032	99.5112	85.4789		Cima4a_ol25	38.5893	0.1642	38.9971	0.4371	-0.0017	0.2923	21.7822	0.1222	100.383	75.9503		Cima4b_ol29	36.4488
Cima1_ol28	38.4618	0.0254	38.9273	0.2681	0.0095	0.3278	21.4713	0.0937	99.5848	76.1516		Cima2_ol44	43.7248	0.0331	40.1583	0.2476	0.0038	0.1998	16.1521	0.1508	100.67	82.8342		Cima3_ol60	40.2256	0.0211	38.9574	0.2536	0	0.3236	19.8218	0.1216	99.7248	78.3432		Cima4a_ol25	32.5148	0.03	37.4522	0.412	-0.0008	0.5015	28.7908	0.0652	99.7657	66.8122		Cima4b_ol29	40.4236
Cima1_ol28	38.3623	0.0321	38.8927	0.2785	0.0127	0.3531	21.7252	0.0909	99.7474	75.8901		Cima2_ol44	43.9813	0.0468	40.3177	0.2429	0.0007	0.1601	15.5793	0.0473	100.376	83.4225		Cima3_ol61	40.0869	0.0146	38.6306	0.2429	0.0255	0.2879	19.8138	0.1209	99.2232	78.2913		Cima4a_ol26	36.1919	0.0415	38.4573	0.3602	0.0064	0.3954	24.7717	0.0732	100.298	72.2562		Cima4b_ol29	35.4101
Cima1_ol28	36.7102	0.0193	38.4609	0.3497	0.0099	0.5337	23.5705	0.0534	99.7075	73.5192		Cima2_ol44	43.7305	0.0245	40.1948	0.2406	-0.0045	0.1612	15.9168	0.0376	100.302	83.0439		Cima3_ol61	31.8901	0.794	38.3434	0.3477	0.0026	0.4743	27.9579	0.0738	99.8837	67.0326		Cima4a_ol26	40.2355	0.026	39.3396	0.2044	0.0072	0.2998	19.9213	0.1297	100.164	78.2625		Cima4b_ol31	36.9065
Cima1_ol29	42.4309	0.0646	39.7744	0.2134	0.0222	0.233	16.6426	0.173	99.5541	81.965		Cima2_ol44	43.826	0.0399	40.2024	0.2431	0.0001	0.1983	16.0755	0.0468	100.632	82.9346		Cima3_ol61	44.2171	0.042	39.5384	0.232	0.029	0.1966	14.6039	0.1793	99.0383	84.3684		Cima4a_ol26	41.2578	0.0322	39.5709	0.2114	0.012	0.2096	18.6055	0.1433	100.043	79.8098		Cima4b_ol31	40.584
Cima1_ol29	42.3901	0.0413	39.8595	0.2167	0.0068	0.1915	17.0021	0.1528	99.8608	81.6325		Cima2_ol44	42.7786	0.3596	39.9202	0.2596	-0.0115	0.1725	15.6385	0.0424	99.1599	82.9822		Cima3_ol61	42.6352	0.029	38.8769	0.2372	0.0353	0.2245	16.9794	0.1666	99.1841	81.7388		Cima4a_ol26	41.7642	0.0299	39.7169	0.2145	0.0096	0.237	18.1154	0.1545	100.242	80.4291		Cima4b_ol31	41.8914
Cima1_ol29	42.2713	0.0416	40.0837	0.22	0.0035	0.2535	17.0737	0.1476	100.095	81.5271		Cima2_ol44	43.6423	0.0352	40.1701	0.2449	-0.001	0.1892	16.0797	0.0538	100.414	82.8712		Cima3_ol62	34.4572	0.1219	38.036	0.4163	0.0054	0.4594	26.2306	0.0688	99.7956	70.0747		Cima4a_ol26	41.3947	0.0303	39.5007	0.2249	0.0125	0.2247	17.9219	0.1456	99.4551	80.4585		Cima4b_ol31	39.1578
Cima1_ol29	42.1067	0.0351	39.9117	0.2135	0.0107	0.235	17.0725	0.1392	99.7243	81.4693		Cima2_ol44	39.9693	0.0345	39.1778	0.2327	0.0052	0.2783	20.4405	0.1394	100.278	77.7067		Cima3_ol62	43.0621	0.0267	39.1791	0.2411	0.0324	0.2254	16.1601	0.15	99.0769	82.6091		Cima4a_ol26	41.9885	0.0251	39.7378	0.2058	0.0169	0.2446	17.8783	0.1547	100.252	80.7193		Cima4b_ol31	44.4842
Cima1_ol29	41.3146	0.0506	40.0338	0.21	0.0178	0.2882	18.4763	0.1524	100.544	79.9439		Cima2_ol45	40.2828	0.0274	39.3973	0.2338	0.0023	0.2702	20.4123	0.1019	100.728	77.8655		Cima3_ol62	45.0284	0.0402	39.7691	0.23	0.0307	0.2057	13.8159	0.2127	99.3327	85.3152		Cima4a_ol26	41.8416	0.0333	39.7406	0.207	0.0114	0.251	18.0962	0.1521	100.333	80.475		Cima4b_ol31	44.6627
Cima1_ol29	41.0594	0.0303	39.5667	0.2476	0.0089	0.2867	18.3754	0.1462	99.721	79.9322		Cima2_ol45	40.3679	0.0388	39.5159	0.2328	0.0116	0.2725	20.2964	0.1343	100.87	77.9999		Cima3_ol62	45.1395	0.0463	40.0656	0.239	0.0364	0.1971	13.3688	0.2161	99.3088	85.7528		Cima4a_ol26	42.0169	0.0393	39.5462	0.2164	0.0138	0.2361	17.9825	0.1457	100.197	80.6393		Cima4b_ol31	44.87
Cima1_ol29	40.9829	0.0318	39.433	0.2266	0.0144	0.2823	18.6209	0.1652	99.7571	79.6884		Cima2_ol45	40.963	0.2032	39.6996	0.2485	0.016	0.2191	18.9901	0.1515	100.491	79.361		Cima3_ol62	45.0814	0.0245	40.1629	0.2497	0.033	0.1683	13.2876	0.2301	99.2373	85.8111		Cima4a_ol26	41.646	0.0451	39.6309	0.2302	0.0141	0.2947	18.405	0.1483	100.414	80.1332		Cima4b_ol31	44.0572
Cima1_ol29	39.2889	0.0136	39.595	0.2405	0.0083	0.3692	21.0033	0.1123	100.631	76.9295		Cima2_ol45	43.3458	0.0344	40.1066	0.2408	0.0092	0.2417	16.7205	0.1775	100.876	82.2101		Cima3_ol62	45.4338	0.0572	39.873	0.2385	0.034	0.2051	13.5828	0.2221	99.6466	85.6375		Cima4a_ol26	34.7197	0.027	37.8498	0.4056	0.0105	0.4512	27.341	0.0685	100.873	69.3595		Cima4b_ol31	42.1783
Cima1_ol29	37.5092	0.0275	38.9135	0.2627	0.0038	0.4822	21.8194	0.128	99.1463	75.3961		Cima2_ol45	39.562	0.0297	39.2847	0.2449	0.0169	0.3267	21.3765	0.1349	100.976	76.7391		Cima3_ol62	45.2193	0.0311	39.9592	0.2319	0.0299	0.1518	13.4136	0.209	99.2458	85.7334		Cima4a_ol27	38.0696	0.0259	38.8054	0.2194	0.0119	0.3764	22.2618	0.1457	99.916	75.2988		Cima4b_ol31	38.7632
Cima1_ol30	42.0108	0.0293	39.8081	0.2005	0.019	0.242	17.5756	0.1732	100.059	80.9917		Cima2_ol45	37.7135	0.0266	38.9247	0.2467	0.0131	0.3648	23.4024	0.1079	100.8	74.1781		Cima3_ol62	44.9379	0.0445	39.8412	0.2374	0.0359	0.2067	14.1234	0.2148	99.6418	85.0116		Cima4a_ol27	42.6217	0.0241	39.9651	0.2097	0.0112	0.2217	16.918	0.2875	100.259	81.7879		Cima4b_ol32	39.2717
Cima1_ol30	41.995	0.0426	39.7739	0.2044	0.0148	0.2608	17.6507	0.1748	100.117	80.9203		Cima2_ol45	40.6859	0.0308	39.5799	0.2219	0.0175	0.3367	19.9553	0.163	100.991	78.4224		Cima3_ol62	43.9802	0.035	39.6485	0.2374	0.0263	0.2197	15.3189	0.1667	99.6326	83.654		Cima4a_ol27	43.4624	0.0371	40.054	0.2251	0.0255	0.2072	15.5838	0.3205	99.9157	83.2539		Cima4b_ol32	41.4907
Cima1_ol30	41.5041	0.0302	39.8072	0.2126	0.0158	0.2537	17.4732	0.1848	99.4815	80.8947		Cima2_ol46	44.3681	0.0364	40.4776	0.2404	0.0187	0.1719	15.0694	0.2255	100.608	83.9959		Cima3_ol63	42.3205	0.0419	39.3011	0.2422	0.0248	0.2214	17.0092	0.132	99.2931	81.6015		Cima4a_ol27	41.9951	0.0549	39.5615	0.2049	0.0173	0.2166	17.4148	0.2809	99.7459	81.1272		Cima4b_ol32	41.4389
Cima1_ol30	41.4599	0.0345	39.6793	0.2061	0.0133	0.2512	17.8918	0.1747	99.7107	80.5095		Cima2_ol46	44.6523	0.0339	40.4344	0.2476	0.0111	0.1676	14.3674	0.255	100.169	84.7096		Cima3_ol63	44.0156	0.0391	39.6797	0.2418	0.0298	0.1965	15.0132	0.1742	99.3898	83.9386		Cima4a_ol27	42.899	0.0426	39.9707	0.2021	0.0218	0.1889	16.4591	0.3035	100.088	82.2887		Cima4b_ol32	41.3256
Cima1_ol30	41.088	0.046	39.7279	0.2102	0.0163	0.2233	18.427	0.1601	99.8987	79.8985		Cima2_ol46	44.5831	0.0236	40.4269	0.2493	0.0095	0.2004	14.3581	0.2373	100.088	84.698		Cima3_ol63	44.1775	0.039	39.794	0.2261	0.0297	0.2251	14.644	0.1951	99.3304	84.3201		Cima4a_ol27	43.5255	0.0382	40.1306	0.2092	0.0268	0.1805	15.5846	0.3186	100.014	83.2735		Cima4b_ol32	41.3619
Cima1_ol30	40.8313	0.0291	39.6678	0.2185	0.0153	0.2663	18.5013	0.1607	99.6902	79.7326		Cima2_ol46	44.7628	0.0626	40.5878	0.268	0.025	0.1961	14.4516	0.2369	100.591	84.6658		Cima3_ol63	43.9458	0.0316	39.6695	0.2505	0.0316	0.2157	15.1713	0.1853	99.5013	83.7754		Cima4a_ol27	43.1539	0.0286	40.0781	0.2081	0.015	0.1852	16.1464	0.3061	100.121	82.6518		Cima4b_ol32	41.3449
Cima1_ol30	40.2659	0.0312	39.6511	0.2022	0.0204	0.3192	19.2352	0.1506	99.8759	78.8654		Cima2_ol46	44.6254	0.0437	40.4056	0.2532	0.0157	0.216	14.6766	0.2274	100.463	84.424		Cima3_ol63	45.4262	0.0451	40.3395	0.2255	0.0345	0.1981	13.4555	0.2311	99.9555	85.7509		Cima4a_ol27	42.2646	0.0298	39.8936	0.2056	0.0141	0.226	17.1874	0.2413	100.062	81.4244		Cima4b_ol32	40.6528
Cima1_ol30	37.5358	0.0177	39.0295	0.2573	0.0015	0.4105	22.6051	0.0852	99.9424	74.7473		Cima2_ol46	44.3307	0.045	40.2786	0.2567	0.0162	0.1882	14.9914	0.222	100.329	84.0542		Cima3_ol63	45.5325	0.0523	40.4539	0.2264	0.0378	0.1949	13.2534	0.2135	99.9648	85.9632		Cima4a_ol27	38.0762	0.0206	38.9174	0.2187	0.014	0.3048	22.5596	0.1084	100.22	75.054		Cima4b_ol32	38.9034
Cima1_ol33	43.3553	0.0313	40.3732	0.2021	0.0121	0.2041	16.0353	0.2092	100.423	82.8167		Cima2_ol46	44.0672	0.04	40.2922	0.2354	0.0197	0.2258	15.3008	0.227	100.408	83.6973		Cima3_ol63	45.2647	0.0335	40.1255	0.2293	0.0229	0.2105	13.6098	0.2028	99.699	85.5673		Cima4a_ol28	36.6865	0.0176	38.5768	0.2364	0.0083	0.3663	24.5836	0.0919	100.567	72.679		Cima4b_ol32	37.6842
Cima1_ol33	42.743	0.0631	40.3303	0.1958	0.0082	0.2004	16.4748	0.1895	100.205	82.2217		Cima2_ol46	43.7392	0.0475	40.1818	0.2448	0.0191	0.2047	15.9932	0.2093	100.64	82.979		Cima3_ol63	44.7709	0.0443	39.9109	0.2441	0.0349	0.193	14.2256	0.1842	99.6078	84.8718		Cima4a_ol28	34.2835	0.0224	38.0219	0.2137	-0.0002	0.4467	27.9642	0.0377	100.99	68.6068		Cima4b_ol32	40.9744
Cima1_ol33	42.4921	0.0275	40.2445	0.2407	0.0118	0.2332	17.2455	0.1735	100.669	81.4548		Cima2_ol46	41.6189	0.0394	39.7717	0.2375	0.0047	0.2559	18.1185	0.1691	100.216	80.3717		Cima3_ol63	43.7087	0.0274	39.5568	0.2601	0.0315	0.2431	15.3885	0.1601	99.3761	83.5068		Cima4a_ol28	33.5237	0.02	37.7781	0.1346	-0.0029	0.3888	28.8493	0.0297	100.721	67.4418		Cima4b_ol33	36.5448
Cima1_ol33	41.4919	0.033	40.1136	0.2085	0.0157	0.2991	18.318	0.1544	100.634	80.1496		Cima2_ol47	34.3565	0.0205	37.9441	0.3945	0.0026	0.4936	27.4609	0.0723	100.745	69.0422		Cima3_ol63	37.6883	0.0213	38.1222	0.2816	0.0102	0.3548	22.4429	0.087	99.0082	74.9593		Cima4a_ol28	32.8484	0.0193	37.7032	0.1253	0.0016	0.3585	29.7801	0.0144	100.851	66.2873		Cima4b_ol33	41.7412
Cima1_ol33	40.688	0.0187	39.9638	0.2222	0.0099	0.2801	19.1611	0.1466	100.49	79.1026		Cima2_ol47	37.0004	0.0282	38.6063	0.2586	0.0184	0.409	24.1459	0.1075	100.574	73.2016		Cima3_ol65	41.3376	0.0258	38.905	0.244	0.018	0.2797	18.4054	0.1146	99.3301	80.0143		Cima4a_ol28	33.0649	-0.002	37.5633	0.1192	0.0026	0.3422	29.5038	0.0281	100.622	66.6414		Cima4b_ol33	41.7766
Cima1_ol33	39.3783	0.0237	39.5222	0.2381	0.0012	0.3308	20.8239	0.134	100.452	77.1214		Cima2_ol47	38.104	0.0685	38.8612	0.2584	0.0097	0.3614	22.8319	0.1479	100.643	74.8424		Cima3_ol65	41.9268	0.043	39.328	0.2575	0.013	0.2362	17.7657	0.0763	99.6466	80.7945		Cima4a_ol28	32.8809	0.0197	37.6122	0.1263	0.0047	0.317	29.8944	0.0162	100.871	66.2239		Cima4b_ol33	41.6487
Cima1_ol33	38.9207	0.0234	39.5881	0.238	0.0064	0.3609	21.1936	0.1019	100.433	76.6005		Cima2_ol47	42.2425	0.0524	39.6673	0.2313	0.0164	0.2702	17.7731	0.2128	100.466	80.9042		Cima3_ol65	42.0145	0.0362	39.8353	0.259	0.0147	0.2572	17.7666	0.0608	100.244	80.8262		Cima4a_ol28	32.6703	0.0184	37.5261	0.1243	0.0083	0.344	29.6429	0.016	100.35	66.2691		Cima4b_ol33	41.7823
Cima1_ol33	38.4527	0.0061	39.2889	0.2864	0.016	0.406	21.8881	0.0855	100.43	75.7965		Cima2_ol47	43.2106	0.039	40.0049	0.2377	0.0062	0.2161	16.7579	0.1938	100.666	82.1316		Cima3_ol65	41.5578	0.0172	39.2445	0.242	0.0189	0.2617	18.1716	0.1114	99.625	80.3021		Cima4a_ol28	32.9797	0.0241	37.653	0.1188	0.0066	0.3327	29.6101	0.0292	100.754	66.504		Cima4b_ol33	41.7146
Cima1_ol34	42.863	0.0334	40.3225	0.2128	0.0108	0.2564	16.2877	0.1925	100.179	82.4288		Cima2_ol47	41.1593	0.0344	39.477	0.2184	0.0061	0.2702	19.5371	0.1463	100.849	78.9714		Cima3_ol65	35.3133	0.0409	37.5979	0.3289	0.0126	0.4463	25.5777	0.0715	99.389	71.1073		Cima4a_ol28	33.343	0.0125	37.8071	0.1262	-0.0019	0.3282	29.1632	0.0301	100.808	67.0845		Cima4b_ol33	41.8741
Cima1_ol34	42.7976	0.0474	40.3175	0.2146	0.0122	0.2259	16.4002	0.1977	100.213	82.3064		Cima2_ol47	33.4076	0.0459	37.4518	0.4696	-0.0042	0.5414	28.8735	0.0546	100.84	67.3471		Cima3_ol65	35.1104	0.0085	37.1829	0.388	0.0045	0.4702	25.7792	0.0583	99.002	70.8268		Cima4a_ol28	35.7468	0.0366	38.9818	0.2213	0.0064	0.4066	25.3767	0.0923	100.868	71.5183		Cima4b_ol33	41.0334
Cima1_ol34	42.7275	0.0367	40.3073	0.214	0.0188	0.2234	16.3735	0.1905	100.092	82.3064		Cima2_ol48	28.0824	0.1525	36.6492	0.8526	0.0113	0.7239	33.9453	0.0479	100.465	59.5911		Cima3_ol69	40.2642	0.0254	38.7778	0.2472	0.017	0.2996	19.8894	0.1254	99.6459	78.3017		Cima4a_ol29	39.0386	0.0285	39.2329	0.2084	0.0057	0.3258	21.615	0.1436	100.599	76.3005		Cima4b_ol34	37.0633
Cima1_ol34	42.8421	0.0507	40.2939	0.2155	0.0224	0.2081	16.4806	0.1905	100.304	82.2503		Cima2_ol48	36.2424	0.0263	38.3052	0.2863	0.0105	0.4115	25.3345	0.0918	100.709	71.8317		Cima3_ol69	44.2385	0.032	39.7665	0.2423	0.0396	0.1955	14.6858	0.1762	99.3764	84.3009		Cima4a_ol29	41.5466	0.0209	39.7801	0.213	0.0166	0.246	18.6678	0.1509	100.642	79.8683		Cima4b_ol34	41.6611
Cima1_ol34	42.6104	0.0372	40.2471	0.2093	0.0061	0.2349	16.5984	0.1768	100.12	82.0664		Cima2_ol48	42.3322	0.0377	39.4477	0.2301	0.0155	0.2421	17.7623	0.167	100.235	80.9463		Cima3_ol69	45.3004	0.0354	39.9613	0.2377	0.0354	0.1751	13.258	0.212	99.2153	85.8971		Cima4a_ol29	41.9434	0.0244	39.8973	0.2152	0.0148	0.2203	18.0617	0.1415	100.518	80.5432		Cima4b_ol34	40.7838
Cima1_ol34	42.6207	0.0416	40.2815	0.2082	0.0049	0.2248	16.8148	0.16	100.357	81.8787		Cima2_ol48	43.1232	0.0386	40.0848	0.2366	0.0224	0.2112	16.5649	0.1849	100.466	82.2713		Cima3_ol69	45.9499	0.0352	40.1363	0.2352	0.0434	0.181	12.6236	0.2441	99.4487	86.6464		Cima4a_ol29	42.028	0.0414	39.9274	0.2133	0.0135	0.2169	17.9134	0.1524	100.506	80.7035		Cima4b_ol34	43.9581
Cima1_ol34	42.4474	0.0494	40.1937	0.2026	-0.0021	0.2222	16.7494	0.1553	100.018	81.876		Cima2_ol48	43.3213	0.0308	40.1128	0.2245	0.0167	0.214	16.7095	0.196	100.826	82.2114		Cima3_ol69	45.951	0.0486	40.5222	0.2323	0.0374	0.1846	12.317	0.2532	99.5464	86.9287		Cima4a_ol29	42.0206	0.0367	39.8105	0.2113	0.0215	0.2357	17.8116	0.1428	100.291	80.7892		Cima4b_ol34	44.2506
Cima1_ol34	41.9537	0.0448	40.073	0.1985	0.0144	0.2645	17.1119	0.1763	99.837	81.3796		Cima2_ol48	42.8513	0.0308	40.0099	0.2323	0.0235	0.2545	17.169	0.18	100.751	81.6482		Cima3_ol69	45.2043	0.0286	39.8673	0.2342	0.0302	0.2168	13.2976	0.2344	99.1134	85.8352		Cima4a_ol29	42.0174	0.0275	39.9527	0.207	0.0196	0.2259	17.9414	0.1447	100.536	80.6752		Cima4b_ol34	44.0627
Cima1_ol34	40.5015	0.038	39.7105	0.2135	0.0068	0.2969	19.2092	0.1492	100.126	78.9848		Cima2_ol48	42.2237	0.0988	40.1599	0.2296	0.0119	0.2368	17.5715	0.1795	100.712	81.0732		Cima3_ol69	45.7183	0.0335	40.2327	0.2334	0.0318	0.2222	12.7791	0.2581	99.509	86.4449		Cima4a_ol29	41.9198	0.0349	39.8107	0.2173	0.0098	0.2223	18.1352	0.14	100.49	80.4704		Cima4b_ol34	43.8593
Cima1_ol34	36.9476	0.0387	39.1141	0.2487	0.0092	0.4756	22.4906	0.0947	99.4192	74.5445		Cima2_ol48	42.229	0.0412	39.8306	0.2245	0.0095	0.2484	17.8963	0.1708	100.65	80.7923		Cima3_ol69	37.0794	0.0222	37.8981	0.3552	0.0149	0.3889	23.3631	0.0992	99.221	73.8844		Cima4a_ol29	41.4219	0.027	39.771	0.2077	0.0142	0.2529	18.6037	0.1534	100.452	79.8751		Cima4b_ol34	42.4594
Cima1_ol35	42.8154	0.0274	40.4639	0.2052	0.0215	0.1983	16.2435	0.1885	100.164	82.4519		Cima2_ol48	40.9855	0.0379	39.7034	0.2116	0.0073	0.2576	19.5003	0.1427	100.846	78.9323		Cima3_ol70	35.6738	0.0251	37.5574	0.2856	0.0094	0.4212	25.0789	0.0697	99.1212	71.7168		Cima4a_ol29	40.1704	0.0413	39.317	0.2022	0.0161	0.2603	20.3757	0.124	100.507	77.8483		Cima4b_ol34	38.8644
Cima1_ol35	42.6795	0.0424	40.3483	0.2145	0.0162	0.2373	16.3345	0.179	100.052	82.3246		Cima2_ol49	44.6114	0.0507	40.5271	0.2297	0.0382	0.209	14.4601	0.1588	100.285	84.6142		Cima3_ol70	34.3008	0.0273	37.1569	0.3217	0.0038	0.4519	27.0998	0.0637	99.426	69.2899		Cima4a_ol30	46.5354	0.0105	41.0162	0.0927	0.0077	0.1376	11.9264	0.3697	100.096	87.4299		Cima4b_ol34	35.7496
Cima1_ol35	42.7387	0.0443	40.5001	0.2139	0.0118	0.2251	16.4518	0.1899	100.376	82.2406		Cima2_ol49	47.8308	0.0369	41.4715	0.2373	0.0367	0.1364	11.1043	0.1262	100.98	88.4769		Cima3_ol70	41.8117	0.0353	38.872	0.2412	0.0229	0.2631	17.7153	0.1287	99.0902	80.7961		Cima4a_ol30	46.8218	0.0009	41.0002	0.0785	0.0105	0.1533	11.8049	0.3581	100.228	87.6088		Cima4b_ol35	37.9592
Cima1_ol35	42.5779	0.0463	40.2023	0.2061	0.0083	0.2339	16.5481	0.168	99.9909	82.0999		Cima2_ol49	48.2857	0.0467	41.3254	0.2363	0.0405	0.143	10.4939	0.1328	100.704	89.1332		Cima3_ol70	42.3315	0.043	39.0694	0.2386	0.0086	0.224	16.9885	0.1303	99.0339	81.6236		Cima4a_ol30	47.0418	-0.0019	41.1372	0.063	0.012	0.1647	11.3525	0.3842	100.154	88.0763		Cima4b_ol35	44.9627
Cima1_ol35	42.1996	0.0547	40.3033	0.206	0.0153	0.2418	16.8169	0.1852	100.023	81.7289		Cima2_ol49	48.6418	0.0363	41.4904	0.229	0.0349	0.1522	9.6622	0.126	100.373	89.9738		Cima3_ol70	42.3188	0.053	38.8443	0.2435	0.0263	0.2667	17.1441	0.1241	99.0206	81.482		Cima4a_ol30	47.4203	0.0073	41.2035	0.0757	0.0119	0.1594	11.2381	0.3645	100.481	88.2655		Cima4b_ol35	45.188
Cima1_ol35	41.7208	0.0324	39.99	0.2019	0.0224	0.2443	17.5058	0.1696	99.8871	80.9463		Cima2_ol49	48.8756	0.0508	41.5547	0.2313	0.0375	0.1465	9.6398	0.1312	100.667	90.038		Cima3_ol70	40.1224	0.0291	38.507	0.2379	0.0132	0.2888	20.0924	0.1072	99.3982	78.0683		Cima4a_ol30	47.3278	0.0144	41.1746	0.0715	0.0034	0.1625	11.0871	0.3824	100.224	88.3848		Cima4b_ol35	45.2034
Cima1_ol35	40.9911	0.0326	39.7904	0.2115	0.0184	0.2788	18.4092	0.1585	99.8904	79.8762		Cima2_ol49	48.7445	0.0438	41.531	0.2357	0.0323	0.1183	9.6626	0.1407	100.509	89.9926		Cima3_ol72	42.3526	0.0289	39.2901	0.2401	0.0174	0.2241	17.1249	0.1336	99.4118	81.5109		Cima4a_ol30	47.2304	0.0012	41.1835	0.0733	0.0011	0.1653	11.1197	0.3798	100.154	88.3333		Cima4b_ol35	45.3428
Cima1_ol35	39.002	0.024	39.3903	0.2808	0.0042	0.3459	20.6555	0.1065	99.8092	77.0954		Cima2_ol49	48.8529	0.0412	41.4467	0.2369	0.033	0.1423	9.631	0.1372	100.521	90.0417		Cima3_ol72	44.5786	0.0348	39.8893	0.2312	0.0367	0.19	14.8249	0.1838	99.9694	84.2773		Cima4a_ol30	47.2602	0.0187	41.2558	0.0736	0.0084	0.1456	11.0445	0.3731	100.18	88.4096		Cima4b_ol35	45.1377
Cima1_ol35	33.3169	1.4316	40.3453	0.6374	0.0023	0.5786	23.8976	0.0421	100.252	71.3071		Cima2_ol49	48.2757	0.053	41.4061	0.2431	0.0467	0.1562	10.3671	0.1325	100.68	89.2484		Cima3_ol72	44.4288	0.0338	39.774	0.2345	0.033	0.2038	14.6778	0.2027	99.5885	84.3647		Cima4a_ol30	46.4556	0.008	41.1	0.1026	0.009	0.1802	12.2804	0.3548	100.491	87.0856		Cima4b_ol35	45.1627
Cima1_ol36	42.1853	0.0427	40.0867	0.2114	0.0134	0.2405	16.7868	0.1879	99.7548	81.7507		Cima2_ol49	41.0124	0.0031	39.7041	0.2314	0.0284	0.3345	19.4348	0.1844	100.933	78.9992		Cima3_ol72	45.2783	0.0444	39.9893	0.2292	0.0394	0.1674	13.3858	0.2066	99.3404	85.7746		Cima4a_ol30	37.9537	-0.0085	38.9712	0.2971	0.0048	0.4154	23.0189	0.1985	100.851	74.6136		Cima4b_ol35	45.111
Cima1_ol36	42.1089	0.041	40.117	0.2131	0.0115	0.2199	16.9	0.1792	99.7906	81.6231		Cima2_ol50	40.9157	0.0268	39.5314	0.2215	0.0177	0.2917	19.7978	0.1659	100.969	78.6509		Cima3_ol72	43.2041	0.0328	39.9755	0.244	0.025	0.255	16.2731	0.163	100.173	82.5562		Cima4a_ol31	41.4309	0.044	39.6541	0.225	0.0137	0.2285	18.7555	0.1444	100.496	79.7476		Cima4b_ol35	44.9837
Cima1_ol36	42.0229	0.0404	40.1669	0.2211	0.0146	0.2521	17.0991	0.1721	99.9893	81.4157		Cima2_ol50	40.25	0.028	39.5059	0.2194	0.0026	0.2886	20.4787	0.1497	100.923	77.7955		Cima3_ol72	39.4106	0.0249	38.6418	0.2889	0.008	0.3532	21.1829	0.1054	100.016	76.8331		Cima4a_ol31	40.6061	0.0358	39.534	0.2209	0.0054	0.2462	19.9374	0.1262	100.712	78.4043		Cima4b_ol35	40.1707
Cima1_ol36	41.5435	0.0324	39.916	0.2234	0.0119	0.2657	17.3005	0.1764	99.4696	81.0625		Cima2_ol50	38.4251	0.0227	39.0311	0.214	0.0095	0.3783	22.5468	0.1374	100.765	75.2349		Cima3_ol74	33.5503	0.0172	37.286	0.3357	0.0045	0.4596	27.338	0.0622	99.0536	68.629		Cima4a_ol31	41.8225	0.0276	40.0043	0.2142	0.0027	0.223	18.066	0.135	100.495	80.4941		Cima4b_ol37	35.3753
Cima1_ol36	41.7064	0.038	40.1086	0.2237	0.0087	0.2526	17.5553	0.1825	100.076	80.8974		Cima2_ol50	35.7615	0.0066	38.3765	0.2674	0.0017	0.4461	25.8091	0.0925	100.761	71.1812		Cima3_ol74	40.6718	0.0204	38.9127	0.2377	0.0168	0.2628	19.2077	0.1375	99.4674	79.0558		Cima4a_ol31	41.9146	0.0358	39.7933	0.2223	0.0037	0.26	18.1601	0.1312	100.521	80.4471		Cima4b_ol37	37.495
Cima1_ol36	41.6474	0.0392	40.091	0.2163	0.0171	0.2451	17.6097	0.1672	100.033	80.8277		Cima2_ol50	31.0229	0.0076	37.2528	0.353	0.0078	0.6019	31.4923	0.0529	100.791	63.7157		Cima3_ol74	42.1038	0.0264	39.1332	0.2328	0.0154	0.2728	17.5153	0.1403	99.4401	81.0786		Cima4a_ol31	41.7826	0.0371	39.8588	0.224	0.0178	0.2191	17.9143	0.141	100.195	80.6112		Cima4b_ol37	38.0562
Cima1_ol36	41.5853	0.0236	40.1113	0.2187	0.0172	0.2483	17.8826	0.1615	100.249	80.5648		Cima2_ol50	30.9313	0.017	37.1683	0.3617	0.0098	0.6445	31.6199	0.0543	100.807	63.5536		Cima3_ol74	42.9626	0.028	39.4616	0.2278	0.0346	0.2347	16.1271	0.1563	99.2327	82.605		Cima4a_ol31	41.8944	0.0315	39.8667	0.2238	0.0156	0.2291	18.1236	0.1578	100.543	80.4711		Cima4b_ol37	39.0616
Cima1_ol36	41.4031	0.0335	40.1349	0.2136	0.0141	0.2952	18.1229	0.164	100.381	80.2857		Cima2_ol50	30.9742	0.0111	37.1937	0.352	0.0006	0.6233	31.6979	0.0606	100.913	63.5287		Cima3_ol74	43.3773	0.0384	39.4412	0.2393	0.0289	0.225	15.685	0.1746	99.2096	83.1359		Cima4a_ol31	41.9108	0.0483	39.8394	0.2178	0.0161	0.2666	17.9983	0.1387	100.436	80.5861		Cima4b_ol37	37.4699
Cima1_ol36	40.4917	0.0369	39.6138	0.2175	0.0224	0.2977	18.9297	0.1525	99.7619	79.2231		Cima2_ol50	29.6575	0.6276	38.8196	0.3838	-0.0025	0.5729	30.0403	0.0505	100.15	63.7663		Cima3_ol74	43.7239	0.0378	39.8265	0.2331	0.038	0.2007	15.4618	0.1793	99.7011	83.4461		Cima4a_ol31	42.045	0.0369	39.8207	0.223	0.0075	0.2057	18.0497	0.1416	100.53	80.5912		Cima4b_ol37	37.4345
Cima1_ol36	36.2419	0.2787	39.5402	0.3634	0.0122	0.4996	23.4762	0.0621	100.474	73.3471		Cima2_ol50	36.7637	0.02	38.5295	0.2468	0.0104	0.4014	24.538	0.1015	100.611	72.7576		Cima3_ol74	43.6479	0.04	39.6903	0.2322	0.0338	0.2148	15.3956	0.1778	99.4323	83.4815		Cima4a_ol31	41.827	0.0391	39.8641	0.2117	0.0192	0.2159	17.9706	0.1565	100.304	80.5786		Cima4b_ol37	37.2104
Cima1_ol37	42.8327	0.0317	40.5906	0.2146	0.0061	0.2382	16.5186	0.1794	100.612	82.2135		Cima2_ol50	40.1943	0.0325	39.1744	0.2319	0.0228	0.2826	20.3448	0.1486	100.432	77.8848		Cima3_ol74	43.1152	0.0238	39.5649	0.2356	0.0248	0.2158	16.0935	0.1546	99.4282	82.686		Cima4a_ol31	41.8351	0.0464	39.9108	0.2129	0.011	0.2264	18.3304	0.1587	100.732	80.2698		Cima4b_ol37	36.6163
Cima1_ol37	42.5845	0.0383	40.5867	0.2132	0.0135	0.233	16.4275	0.1801	100.277	82.2094		Cima2_ol51	29.1681	0.0137	36.8861	0.377	-0.006	0.7032	33.7577	0.0482	100.948	60.6336		Cima3_ol74	40.7573	0.0302	38.7616	0.2622	0.0039	0.2857	19.1529	0.1259	99.3797	79.1377		Cima4a_ol32	42.3815	0.0322	39.8893	0.2195	0.0233	0.206	17.1467	0.1664	100.065	81.5022		Cima4b_ol38	36.3557
Cima1_ol37	42.7624	0.0465	40.5328	0.2173	0.0221	0.2407	16.5232	0.1637	100.509	82.1854		Cima2_ol51	34.355	0.0107	38.1823	0.2721	0.0047	0.48	27.3737	0.08	100.759	69.1093		Cima3_ol76	43.5885	0.0368	39.4453	0.2377	0.0233	0.2259	15.8961	0.1673	99.621	83.0164		Cima4a_ol32	42.6771	0.0414	40.0018	0.2239	0.0044	0.2024	17.2039	0.1548	100.51	81.5567		Cima4b_ol38	39.9566
Cima1_ol37	42.6628	0.0317	40.594	0.2181	0.0218	0.2104	16.5323	0.1869	100.458	82.1432		Cima2_ol51	36.7522	0.2963	38.9241	0.2725	0.0113	0.3725	23.6196	0.1037	100.352	73.501		Cima3_ol76	45.6799	0.0302	39.8667	0.231	0.0383	0.1517	12.8562	0.2294	99.0834	86.3643		Cima4a_ol32	41.5537	0.0361	39.8214	0.1865	-0.0085	0.2342	18.705	0.1305	100.659	79.8389		Cima4b_ol38	42.6874
Cima1_ol37	42.551	0.0405	40.6282	0.2117	0.0114	0.2662	16.7042	0.1828	100.596	81.9521		Cima2_ol51	39.8225	0.0232	39.5072	0.2235	0.0217	0.303	20.8813	0.1424	100.925	77.2704		Cima3_ol76	46.1096	0.0385	39.9897	0.2406	0.0444	0.1821	12.5341	0.2393	99.3784	86.7682		Cima4a_ol32	41.5341	0.0433	39.6119	0.185	0.003	0.2336	18.5283	0.1168	100.256	79.9838		Cima4b_ol38	43.3579
Cima1_ol37	42.4743	0.0285	40.58	0.2142	0.0183	0.2133	16.7364	0.1815	100.447	81.8969		Cima2_ol51	40.9652	0.0224	39.6484	0.2165	0.0065	0.2951	19.3641	0.1494	100.668	79.0405		Cima3_ol76	45.9641	0.0582	39.9614	0.2547	0.0362	0.1419	12.4678	0.2467	99.1309	86.793		Cima4a_ol32	41.0902	0.0417	39.6104	0.1912	0.0023	0.1937	18.8268	0.1249	100.081	79.5524		Cima4b_ol38	43.6735
Cima1_ol37	42.046	0.0347	40.3717	0.2336	0.0164	0.2024	17.009	0.1563	100.07	81.5039		Cima2_ol51	41.5095	0.016	39.7655	0.2224	0.0174	0.2862	18.8176	0.1657	100.8	79.725		Cima3_ol76	45.9078	0.0597	40.0413	0.2338	0.0467	0.1718	12.487	0.2444	99.1924	86.7613		Cima4a_ol32	41.3294	0.0458	39.5473	0.1828	0.0026	0.1951	18.7434	0.1325	100.179	79.7186		Cima4b_ol38	43.6823
Cima1_ol37	42.0326	0.0295	40.2594	0.2192	0.0156	0.2433	17.0647	0.1759	100.04	81.4497		Cima2_ol51	40.7346	0.0275	39.5391	0.2245	0.0176	0.318	19.9458	0.1397	100.947	78.4506		Cima3_ol76	46.0855	0.0367	40.0393	0.2368	0.0416	0.1863	12.6842	0.2385	99.549	86.6252		Cima4a_ol32	41.9613	0.0522	39.7718	0.1959	-0.0062	0.2348	17.8807	0.1384	100.229	80.7072		Cima4b_ol38	43.3576
Cima1_ol37	42.3408	0.0343	40.5662	0.2159	0.0128	0.2337	17.3	0.1774	100.881	81.3529		Cima2_ol51	39.0768	0.028	39.3071	0.2264	0.0083	0.3351	21.8138	0.1339	100.929	76.1524		Cima3_ol76	45.5282	0.0453	39.8957	0.2305	0.0308	0.173	13.2894	0.2187	99.4115	85.9292		Cima4a_ol32	42.3016	0.0407	39.7957	0.2025	0.0046	0.2137	17.4987	0.1459	100.203	81.1649		Cima4b_ol38	42.8327
Cima1_ol39	40.9592	0.0297	39.9274	0.2103	0.0112	0.2551	18.1944	0.1605	99.7478	80.0518		Cima2_ol51	36.8448	0.0243	38.6399	0.2615	0.007	0.3859	24.4598	0.0982	100.721	72.8642		Cima3_ol76	43.5426	0.0302	39.2272	0.2407	0.0345	0.226	15.6079	0.1732	99.0823	83.2581		Cima4a_ol32	40.8857	0.0289	39.5647	0.2143	0.0068	0.2992	19.6301	0.1446	100.774	78.7811		Cima4b_ol38	40.8641
Cima1_ol39	40.957	0.0431	40.2583	0.2059	0.0096	0.2645	18.207	0.1577	100.103	80.0398		Cima2_ol52	42.2197	0.0458	39.796	0.2232	0.0075	0.2579	17.8269	0.1514	100.528	80.8492		Cima3_ol76	40.4807	0.1256	38.6204	0.2714	0.0253	0.2982	19.2126	0.1079	99.142	78.9735		Cima4a_ol33	34.6639	0.0217	37.9678	0.4172	-0.0057	0.4609	26.5113	0.0673	100.105	69.9767		Cima4b_ol38	36.7375
Cima1_ol39	41.0292	0.0244	39.9232	0.2077	0.0188	0.2781	18.3765	0.1565	100.014	79.9196		Cima2_ol52	43.2912	0.0488	40.0102	0.2247	0.0138	0.2506	16.6923	0.1913	100.723	82.2162		Cima3_ol77	43.5031	0.0433	39.7401	0.2436	0.018	0.2538	16.2219	0.1631	100.187	82.7002		Cima4a_ol33	33.3446	0.0354	37.6622	0.3613	-0.0031	0.4927	28.3943	0.0594	100.347	67.6727		Cima4b_ol39	40.1929
Cima1_ol39	40.9738	0.033	39.8112	0.2054	0.0226	0.2979	18.3794	0.1591	99.8824	79.8954		Cima2_ol52	43.7674	0.0426	40.0775	0.2468	0.0055	0.2269	15.6413	0.219	100.227	83.3		Cima3_ol77	45.3174	0.0229	40.3222	0.2371	0.026	0.215	13.6825	0.1957	100.019	85.5156		Cima4a_ol33	38.5988	0.0222	38.9157	0.2106	0.0154	0.3591	22.1049	0.1128	100.34	75.685		Cima4b_ol39	40.6448
Cima1_ol39	40.6602	0.0238	39.8921	0.209	0.0139	0.2668	18.3267	0.155	99.5475	79.818		Cima2_ol52	44.4426	0.0367	40.4179	0.2411	0.0186	0.1937	14.9965	0.2225	100.57	84.0836		Cima3_ol77	44.8006	0.0311	40.2206	0.2536	0.0236	0.1964	14.1382	0.1886	99.8527	84.9593		Cima4a_ol33	41.165	0.0185	39.4736	0.2134	0.0254	0.2443	19.0582	0.1458	100.344	79.3827		Cima4b_ol39	41.0071
Cima1_ol39	40.7733	0.0388	39.8987	0.2199	0.0213	0.2931	18.4148	0.1632	99.8232	79.7855		Cima2_ol52	44.7176	0.0414	40.3683	0.2362	0.03	0.2132	14.708	0.2405	100.555	84.423		Cima3_ol77	46.2741	0.0381	40.5279	0.2538	0.0431	0.1808	12.3752	0.2086	99.9015	86.9545		Cima4a_ol33	41.9905	0.0448	39.6982	0.2186	0.0234	0.2351	17.8475	0.1438	100.202	80.7469		Cima4b_ol39	41.1559
Cima1_ol39	40.8909	0.0391	39.7765	0.2112	0.012	0.2939	18.5056	0.1668	99.896	79.7525		Cima2_ol52	44.466	0.0338	40.3355	0.2407	0.018	0.2047	14.6809	0.2349	100.215	84.3728		Cima3_ol77	46.5272	0.045	40.9621	0.252	0.0418	0.1863	12.569	0.216	100.799	86.84		Cima4a_ol33	41.8417	0.0327	39.6355	0.2103	0.0193	0.2225	17.9945	0.1429	100.099	80.5635		Cima4b_ol39	41.2677
Cima1_ol39	40.696	0.0343	39.7447	0.2214	0.0155	0.2708	18.6487	0.1667	99.7982	79.5502		Cima2_ol52	42.9596	0.0345	40.0658	0.2293	0.0152	0.245	16.9164	0.1922	100.658	81.9067		Cima3_ol77	45.608	0.259	40.6587	0.387	0.0408	0.1839	12.6502	0.1948	99.9824	86.5353		Cima4a_ol33	41.5345	0.0352	39.5535	0.2127	0.0183	0.2328	18.6102	0.151	100.348	79.9134		Cima4b_ol39	33.1449
Cima1_ol39	40.0791	0.0314	39.7232	0.2176	0.0196	0.3014	18.8354	0.1406	99.3483	79.1367		Cima2_ol52	34.4208	0.0176	38.006	0.3194	-0.0008	0.5038	27.4094	0.0861	100.762	69.1222		Cima3_ol77	46.2524	0.04	40.6446	0.2536	0.0387	0.1894	12.5478	0.2089	100.175	86.7913		Cima4a_ol33	40.7889	0.0261	39.3856	0.2158	0.0079	0.2584	19.349	0.1307	100.162	78.9819		Cima4b_ol39	40.6973
Cima1_ol39	39.3277	0.0246	39.5151	0.2558	0.0144	0.3329	20.0288	0.1255	99.6247	77.7787		Cima2_ol53	28.0535	0.0852	36.4106	0.464	0.0049	0.7386	34.7113	0.0481	100.516	59.0276		Cima3_ol77	46.0402	0.0275	40.5536	0.2314	0.0302	0.1815	13.0168	0.2017	100.283	86.3108		Cima4a_ol33	34.2587	0.0137	37.8076	0.4034	0.0061	0.4337	26.8772	0.0741	99.8745	69.439		Cima4b_ol39	40.2567
Cima1_ol40	45.1869	0.0387	40.887	0.2358	0.037	0.1637	12.9672	0.306	99.8222	86.1338		Cima2_ol53	40.73	0.0216	39.4273	0.2288	0.0159	0.2643	19.9488	0.1541	100.791	78.4461		Cima3_ol77	43.1558	0.0269	40.03	0.2404	0.0097	0.2449	16.6449	0.1568	100.509	82.2119		Cima4a_ol34	41.5719	0.0295	39.6658	0.2369	0.0113	0.2176	18.1142	0.1605	100.008	80.3575		Cima4b_ol39	39.0384
Cima1_ol40	44.7724	0.0444	40.6945	0.2335	0.0398	0.1597	13.5701	0.2699	99.7843	85.4681		Cima2_ol53	42.5349	0.0372	39.8789	0.2371	0.0217	0.2341	17.417	0.1745	100.535	81.3201		Cima3_ol83	42.3579	0.0383	39.2625	0.2269	0.0225	0.2655	17.443	0.1382	99.7548	81.2338		Cima4a_ol34	44.7588	0.0376	40.3034	0.2176	0.0269	0.186	14.217	0.2225	99.9699	84.876		Cima4b_ol40	40.8405
Cima1_ol40	44.5708	0.0385	40.7174	0.2328	0.0346	0.1821	13.8427	0.2579	99.8766	85.1624		Cima2_ol53	42.087	0.0449	39.8965	0.2423	0.0109	0.2292	18.1239	0.1495	100.784	80.5428		Cima3_ol83	45.877	0.0463	40.2454	0.223	0.0273	0.1501	12.7105	0.2172	99.4968	86.5484		Cima4a_ol34	44.8967	0.0557	41.1508	0.2289	0.0361	0.1684	13.702	0.2542	100.493	85.382		Cima4b_ol40	42.4779
Cima1_ol40	44.3864	0.039	40.6638	0.2342	0.0417	0.1761	14.1549	0.262	99.9582	84.8251		Cima2_ol53	41.2348	0.0296	39.4515	0.2237	0.0099	0.3067	19.485	0.1318	100.873	79.0461		Cima3_ol83	46.268	0.0434	40.2609	0.2332	0.047	0.1778	12.3767	0.2419	99.6488	86.9518		Cima4a_ol34	45.2794	0.0448	40.6639	0.222	0.0385	0.1683	13.4337	0.2752	100.126	85.7315		Cima4b_ol40	43.5546
Cima1_ol40	43.7996	0.0484	40.165	0.2264	0.0426	0.2268	14.4215	0.2697	99.1999	84.4088		Cima2_ol53	40.7672	0.037	39.3717	0.1838	0.0183	0.3069	20.0082	0.1245	100.817	78.4114		Cima3_ol83	46.2429	0.0392	40.3281	0.2286	0.041	0.1693	12.3876	0.2436	99.6803	86.9355		Cima4a_ol34	45.1436	0.0385	40.5837	0.2273	0.0307	0.1743	13.6571	0.271	100.126	85.4911		Cima4b_ol40	44.414
Cima1_ol40	43.1391	0.0335	40.4209	0.2147	0.0077	0.2132	15.7054	0.2162	99.9508	83.0404		Cima2_ol53	41.6145	1.5244	38.7077	0.3096	0.0227	0.2736	18.0653	0.1383	100.656	80.4165		Cima3_ol83	45.719	0.0383	40.2914	0.2293	0.038	0.1828	13.1923	0.2175	99.9086	86.0681		Cima4a_ol34	45.0551	0.0276	40.6154	0.2209	0.0371	0.1619	13.652	0.2683	100.038	85.4714		Cima4b_ol40	44.5896
Cima1_ol41	42.4617	0.0441	40.2426	0.2328	0.0102	0.2371	16.7778	0.169	100.175	81.8557		Cima2_ol54	34.6434	0.0226	37.9156	0.3631	0.0004	0.4882	27.1895	0.0868	100.71	69.431		Cima3_ol83	42.8909	0.052	39.7834	0.2626	0.0279	0.2371	16.5421	0.1674	99.9633	82.2124		Cima4a_ol34	45.1298	0.0488	40.6623	0.2153	0.0346	0.1503	13.5946	0.253	100.089	85.5441		Cima4b_ol40	42.3356
Cima1_ol41	42.7189	0.0415	40.4608	0.2179	0.0145	0.2327	16.9147	0.1978	100.799	81.8247		Cima2_ol54	40.2434	0.0271	39.2848	0.2321	0.009	0.303	20.384	0.1429	100.626	77.8726		Cima3_ol83	45.4429	0.0323	40.2382	0.2298	0.0261	0.1925	13.4856	0.212	99.8593	85.7282		Cima4a_ol34	45.1286	0.0392	40.9463	0.2496	0.0404	0.1913	13.5474	0.248	100.391	85.5867		Cima4b_ol40	42.3694
Cima1_ol41	42.6187	0.0372	40.6222	0.2188	0.0172	0.2311	17.0446	0.1122	100.902	81.6756		Cima2_ol54	41.6943	0.0184	39.4829	0.2186	0.0193	0.2721	18.9326	0.1666	100.805	79.6982		Cima3_ol83	45.9976	0.0434	40.1166	0.2281	0.0354	0.1762	13.1377	0.2173	99.9524	86.1902		Cima4a_ol34	44.9548	0.0368	41.0123	0.2182	0.0278	0.1678	13.8641	0.2483	100.53	85.2511		Cima4b_ol40	42.1352
Cima1_ol41	42.2372	0.0427	40.3628	0.2161	0.0111	0.258	17.1734	0.1697	100.471	81.4272		Cima2_ol54	42.6203	0.0233	39.7709	0.2329	0.0077	0.2315	17.685	0.1645	100.736	81.1179		Cima3_ol83	40.5182	0.0141	39.0305	0.2682	0.0151	0.3196	19.5873	0.1088	99.8619	78.6663		Cima4a_ol34	41.8871	0.0351	40.3558	0.2138	0.0136	0.2438	17.7318	0.1675	100.648	80.8095		Cima4b_ol40	39.7423
Cima1_ol41	41.577	0.041	40.0537	0.2197	0.018	0.257	17.7213	0.1624	100.05	80.7034		Cima2_ol54	37.9511	0.0224	38.6461	0.3865	-0.0007	0.3779	23.2521	0.1003	100.736	74.4211		Cima3_ol84	40.9887	0.0261	38.9894	0.2406	0.0218	0.2963	18.6912	0.1123	99.3664	79.6298		Cima4a_ol35	41.5571	0.0398	39.7057	0.2205	0.0158	0.2538	18.4821	0.1413	100.416	80.0326		Cima4b_ol42	35.5904
Cima1_ol41	40.4151	0.0158	39.7307	0.2321	0.0162	0.3306	19.426	0.1467	100.313	78.7623		Cima2_ol54	40.6769	0.2751	40.8244	0.2671	0.02	0.2801	18.1565	0.1664	100.666	79.9745		Cima3_ol84	43.9025	0.0361	39.7123	0.2784	0.0179	0.197	14.9847	0.1159	99.2448	83.9297		Cima4a_ol35	40.1481	0.0289	39.4749	0.2092	0.0154	0.2713	20.4875	0.1349	100.77	77.7442		Cima4b_ol42	40.8172
Cima1_ol42	44.1235	0.055	40.8208	0.1957	0.0202	0.1772	14.4582	0.2604	100.111	84.4723		Cima2_ol54	44.1338	0.0285	40.1572	0.2351	0.0165	0.2232	15.602	0.2113	100.608	83.4505		Cima3_ol84	41.6931	0.037	38.9767	0.2096	-0.0052	0.2362	18.01	0.0823	99.2397	80.4941		Cima4a_ol35	39.5839	0.0252	39.29	0.2099	0.0171	0.2998	21.147	0.1196	100.692	76.9411		Cima4b_ol42	40.6731
Cima1_ol42	44.1767	0.0517	40.8226	0.1891	0.0211	0.2269	14.5965	0.2507	100.335	84.3629		Cima2_ol54	44.2955	0.0323	40.0789	0.2397	0.0239	0.2029	15.3209	0.2176	100.412	83.7498		Cima3_ol84	40.985	0.0219	38.841	0.1678	-0.0014	0.2611	18.9183	0.0772	99.2708	79.4318		Cima4a_ol35	40.7378	0.0484	40.1285	0.2178	0.0057	0.259	19.0147	0.15	100.562	79.249		Cima4b_ol42	39.4269
Cima1_ol42	44.1306	0.039	40.785	0.1995	0.0099	0.1881	14.5858	0.2442	100.182	84.3587		Cima2_ol54	43.4254	0.0455	40.0176	0.242	0.0148	0.2118	16.5365	0.1782	100.672	82.3977		Cima3_ol84	43.0593	0.0478	39.7032	0.2136	0.0089	0.2457	17.4835	0.1	100.862	81.4478		Cima4a_ol35	38.4395	0.0312	39.0821	0.2145	0.0159	0.3196	22.4802	0.1203	100.703	75.2971		Cima4b_ol42	41.2149
Cima1_ol42	44.067	0.0424	40.858	0.207	0.0084	0.2104	14.8913	0.2285	100.513	84.0639		Cima2_ol54	38.0328	0.0352	38.4005	0.2855	0.0187	0.3946	23.641	0.1138	100.922	74.1453		Cima3_ol84	42.9728	0.0307	39.3071	0.2203	0.0207	0.235	16.1413	0.1028	99.0307	82.5959		Cima4a_ol35	39.6915	0.033	39.4401	0.2126	0.0204	0.3465	21.0174	0.1303	100.892	77.0981		Cima4b_ol42	41.1455
Cima1_ol42	43.478	0.0526	40.6679	0.2089	0.0099	0.254	15.5182	0.1912	100.381	83.3175		Cima2_ol55	36.5351	0.0159	38.5047	0.2904	0.01	0.4357	24.9581	0.1029	100.853	72.2951		Cima3_ol84	44.1878	0.0375	39.6286	0.2653	0.0299	0.2057	14.9674	0.1699	99.4921	84.0323		Cima4a_ol35	40.7485	0.0248	39.5013	0.2215	0.0057	0.2771	19.2346	0.1323	100.146	79.0638		Cima4b_ol42	39.7134
Cima1_ol42	42.8153	0.0499	40.4059	0.2085	-0.0017	0.2453	16.229	0.1599	100.112	82.4647		Cima2_ol55	35.5626	0.0109	38.2645	0.3215	0.0074	0.4794	26.0805	0.1017	100.829	70.8511		Cima3_ol84	40.7521	0.0158	38.7532	0.2519	0.0201	0.3214	18.9299	0.1163	99.1607	79.3283		Cima4a_ol35	39.3961	0.0385	39.2959	0.2062	0.0235	0.2957	20.7765	0.128	100.16	77.1696		Cima4b_ol42	36.8822
Cima1_ol42	42.3114	0.0463	40.4771	0.2123	0.0176	0.2576	17.1052	0.1702	100.598	81.5137		Cima2_ol55	35.4538	0.0358	38.3087	0.3283	0.013	0.4537	26.0799	0.1055	100.779	70.7885		Cima3_ol88	37.5193	0.0294	38.2455	0.3585	0.0291	0.3613	22.6093	0.0635	99.2159	74.7356		Cima4a_ol35	36.3275	0.0256	38.5447	0.2845	0.0103	0.3732	25.2562	0.0916	100.913	71.9416		Cima4b_ol43	38.2016
Cima1_ol42	39.4118	0.0362	39.5291	0.2619	0.0057	0.3328	20.4043	0.1225	100.104	77.4935		Cima2_ol55	35.4984	0.0203	38.3097	0.2992	0.0069	0.3991	26.1966	0.0966	100.827	70.722		Cima3_ol88	42.3636	0.0342	39.326	0.2415	0.0203	0.244	17.1709	0.1294	99.53	81.4744		Cima4a_ol36	39.2228	0.035	39.3414	0.2155	0.011	0.2982	21.1561	0.1338	100.414	76.7704		Cima4b_ol43	41.5952
Cima1_ol42	38.635	0.0237	39.5114	0.2607	-0.007	0.364	21.2287	0.1162	100.133	76.4383		Cima2_ol55	36.8171	0.0269	38.7277	0.2429	-0.0036	0.4282	24.5518	0.108	100.899	72.7752		Cima3_ol88	42.369	0.0276	39.1313	0.2425	0.0276	0.2742	17.0826	0.1307	99.2855	81.5541		Cima4a_ol36	41.2114	0.0371	39.6476	0.2203	0.012	0.264	18.7631	0.1196	100.275	79.6552		Cima4b_ol43	42.2759
Cima1_ol43	42.5693	0.0398	40.2587	0.2	0.0059	0.2259	16.0997	0.157	99.5564	82.4971		Cima2_ol55	36.6876	0.0191	38.5907	0.2495	-0.0012	0.4305	24.7088	0.091	100.776	72.5784		Cima3_ol88	39.9837	0.0308	38.6967	0.2493	0.0153	0.3113	20.4103	0.1122	99.8095	77.7386		Cima4a_ol36	40.7088	0.0389	39.5284	0.225	0.0158	0.2519	19.4262	0.1075	100.302	78.8828		Cima4b_ol43	43.6014
Cima1_ol43	42.5554	0.0489	40.2575	0.2028	0.0279	0.2096	16.0962	0.1926	99.591	82.4954		Cima2_ol56	44.7441	0.0398	40.4083	0.2475	0.0193	0.2043	14.4211	0.2471	100.332	84.6879		Cima3_ol88	41.2307	0.0249	38.9053	0.2357	0.0106	0.2571	18.4049	0.1264	99.1957	79.9733		Cima4a_ol36	41.2876	0.0255	39.6418	0.2234	0.0169	0.2233	18.5798	0.1182	100.117	79.8435		Cima4b_ol43	43.8351
Cima1_ol43	42.6611	0.0395	40.1718	0.2045	-0.0022	0.261	16.3787	0.1583	99.8727	82.2791		Cima2_ol56	44.6733	0.0451	40.3164	0.2411	0.0176	0.2019	14.3978	0.2443	100.138	84.6885		Cima3_ol88	39.2672	0.029	38.5722	0.244	0.0034	0.2891	20.5761	0.1025	99.0833	77.2823		Cima4a_ol36	40.5852	0.0247	39.5608	0.2194	0.0088	0.2551	19.7029	0.1182	100.475	78.5953		Cima4b_ol43	42.9514
Cima1_ol43	42.4043	0.0324	40.2144	0.2087	0.0193	0.2252	16.2809	0.1768	99.5621	82.2782		Cima2_ol56	44.7713	0.0364	40.3752	0.2359	0.0153	0.2089	14.675	0.2319	100.55	84.4683		Cima3_ol89	42.4729	0.0281	39.2887	0.2423	0.0271	0.2425	16.79	0.1356	99.2273	81.8489		Cima4a_ol36	40.2023	0.029	39.4583	0.2128	0.0139	0.2667	20.0133	0.1146	100.311	78.1699		Cima4b_ol43	42.9057
Cima1_ol43	42.4563	0.0449	40.1181	0.2104	0.0121	0.2043	16.3083	0.1628	99.5172	82.2717		Cima2_ol56	44.2499	0.0471	40.2628	0.2328	0.0185	0.1891	14.9055	0.2357	100.141	84.1066		Cima3_ol89	36.7488	0.0278	37.9519	0.322	0.0136	0.3932	23.9075	0.1237	99.4885	73.2624		Cima4a_ol36	39.0936	0.0268	39.0982	0.2042	0.0179	0.3286	21.6979	0.1193	100.587	76.2567		Cima4b_ol43	41.2513
Cima1_ol43	42.4698	0.0426	40.3555	0.2058	0.0232	0.2238	16.3926	0.1866	99.9	82.2011		Cima2_ol56	44.1969	0.0424	40.3226	0.2356	0.0229	0.1734	15.3404	0.2231	100.557	83.7021		Cima3_ol89	45.5501	0.0441	39.8992	0.2329	0.0333	0.2056	13.0356	0.227	99.2279	86.1664		Cima4a_ol36	37.6544	0.028	38.7986	0.2082	0.0092	0.3383	23.095	0.0997	100.231	74.4005		Cima4b_ol43	36.0985
Cima1_ol43	42.0361	0.0485	40.0564	0.2058	0.0124	0.2173	16.939	0.1755	99.691	81.5626		Cima2_ol56	43.3853	0.0687	40.5775	0.2422	0.0125	0.2301	15.9404	0.2195	100.676	82.911		Cima3_ol89	44.5858	0.0382	40.0987	0.2429	0.0301	0.1702	14.1893	0.1902	99.5454	84.8513		Cima4a_ol36	36.1445	0.0332	38.5746	0.2467	0.0056	0.4435	24.8824	0.0942	100.425	72.1404		Cima4b_ol44	40.9421
Cima1_ol43	40.7582	0.041	39.7433	0.2133	0.0187	0.2809	18.2717	0.1642	99.4913	79.905		Cima2_ol56	42.8343	0.0507	39.9029	0.2248	0.0135	0.2408	16.6022	0.1863	100.056	82.14		Cima3_ol89	42.8666	0.0221	39.2681	0.2437	0.0315	0.2111	16.3983	0.1499	99.1912	82.3316		Cima4a_ol36	35.0392	0.0345	38.3412	0.3444	0.0033	0.4119	26.4257	0.0787	100.679	70.2701		Cima4b_ol44	40.6502
Cima1_ol43	40.5742	0.0244	39.8174	0.2126	0.0212	0.292	18.6273	0.1566	99.7257	79.52		Cima2_ol56	41.4442	0.0504	39.5633	0.2119	0.0129	0.2618	18.0822	0.1693	99.7961	80.3369		Cima3_ol90	41.8511	0.0276	39.2544	0.2354	0.0074	0.256	17.7161	0.1334	99.4813	80.8101		Cima4a_ol37	41.1315	0.0475	39.4842	0.2358	0.0111	0.2347	18.9217	0.0319	100.098	79.4868		Cima4b_ol44	40.6378
Cima1_ol43	38.0777	0.0273	39.5181	0.2959	0.0144	0.3843	21.9641	0.096	100.378	75.5521		Cima2_ol56	39.9003	0.0279	39.2888	0.2297	0.0159	0.3251	20.3208	0.1487	100.257	77.7786		Cima3_ol90	42.0404	0.0255	39.3735	0.2333	0.0221	0.2945	18.0052	0.1269	100.121	80.6282		Cima4a_ol37	41.024	0.0471	39.4749	0.2401	0.0025	0.204	19.1352	0.0324	100.16	79.2603		Cima4b_ol44	40.5032
Cima1_ol44	41.6966	0.0423	39.8676	0.2172	0.0158	0.2585	17.5683	0.1825	99.8488	80.8823		Cima2_ol57	28.9561	0.1141	36.7025	0.5593	-0.0026	0.7459	33.2891	0.0391	100.403	60.7928		Cima3_ol90	41.9529	0.0361	39.4036	0.2411	0.0128	0.2552	17.5931	0.1289	99.6237	80.9551		Cima4a_ol37	41.1372	0.0491	39.5112	0.233	0.0089	0.205	18.7789	0.0147	99.9381	79.6125		Cima4b_ol44	40.8064
Cima1_ol44	41.813	0.0269	40.4642	0.2167	0.0255	0.258	17.6232	0.1638	100.591	80.8773		Cima2_ol57	43.8063	0.035	40.1347	0.2578	0.0369	0.2215	15.5319	0.2876	100.312	83.4098		Cima3_ol90	41.9032	0.0424	39.8377	0.2421	0.0297	0.2476	17.803	0.1246	100.23	80.7534		Cima4a_ol37	41.3594	0.0422	39.478	0.2398	-0.0032	0.2059	18.892	0.0168	100.231	79.6024		Cima4b_ol44	40.8319
Cima1_ol44	41.6294	0.0421	39.9052	0.2095	0.0131	0.2635	17.7281	0.1771	99.9679	80.717		Cima2_ol57	45.4067	0.0367	40.5065	0.2355	0.043	0.1892	13.389	0.3261	100.133	85.8064		Cima3_ol90	41.9938	0.0217	39.4594	0.2383	0.0137	0.2328	17.9547	0.1242	100.038	80.6549		Cima4a_ol37	40.9313	0.0358	39.5621	0.2304	0.0082	0.2162	19.4707	0.0169	100.472	78.9356		Cima4b_ol44	40.8062
Cima1_ol44	41.5337	0.0375	39.8503	0.2168	0.0077	0.2413	17.6889	0.1793	99.7556	80.7155		Cima2_ol57	45.8661	0.0301	40.6114	0.2477	0.0345	0.1801	12.8619	0.3584	100.19	86.4071		Cima3_ol90	41.4013	0.0354	39.3455	0.2371	0.0118	0.2717	18.1954	0.1253	99.6236	80.2216		Cima4a_ol37	41.4029	0.0332	39.5298	0.2313	0.0108	0.2405	18.8417	0.0147	100.305	79.6626		Cima4b_ol44	40.8341
Cima1_ol44	41.4666	0.0443	39.9621	0.2243	0.0189	0.2364	17.6646	0.1704	99.7876	80.7118		Cima2_ol57	46.0586	0.039	40.7382	0.2428	0.0471	0.2067	12.8988	0.3448	100.576	86.4227		Cima3_ol90	38.5224	0.0203	38.93	0.2474	0.0152	0.3045	21.5015	0.1016	99.643	76.1547		Cima4a_ol37	41.2393	0.0559	39.5211	0.2342	-0.0072	0.2197	18.7289	0.0118	100.004	79.6958		Cima4b_ol44	40.987
Cima1_ol44	41.4338	0.033	40.0031	0.215	0.014	0.2286	17.653	0.1618	99.7423	80.7097		Cima2_ol57	45.6147	0.0319	40.5913	0.2596	0.053	0.1729	13.2217	0.3383	100.283	86.0138		Cima3_ol90	41.109	0.023	39.3891	0.2537	0.0044	0.2665	18.7687	0.1223	99.9367	79.6101		Cima4a_ol37	41.4803	0.0387	39.6076	0.2345	0.0012	0.2186	18.8769	0.0163	100.474	79.6627		Cima4b_ol44	38.1747
Cima1_ol44	41.1173	0.0716	39.8919	0.2239	0.0335	0.2986	17.7189	0.1738	99.5295	80.5316		Cima2_ol57	45.2614	0.0482	40.543	0.2809	0.052	0.1694	13.5811	0.2874	100.223	85.5925		Cima3_ol90	39.4207	0.0148	38.8417	0.2664	0.0109	0.3136	21.246	0.0981	100.212	76.7845		Cima4a_ol37	41.2281	0.0371	39.6398	0.2329	-0.0038	0.2281	18.758	0.0219	100.142	79.6662		Cima4b_ol45	44.6119
Cima1_ol44	41.2665	0.0372	39.9611	0.2118	0.0207	0.254	17.8754	0.1561	99.7827	80.4505		Cima2_ol57	45.7191	0.0347	40.7198	0.2445	0.0296	0.1994	12.9377	0.2975	100.182	86.2999		Cima3_ol91	43.5917	0.0295	40.1596	0.2343	0.0292	0.2418	15.8775	0.1554	100.319	83.0339		Cima4a_ol37	40.6403	0.0397	39.5444	0.225	0.0067	0.2836	19.2373	0.1459	100.123	79.0175		Cima4b_ol45	45.2476
Cima1_ol44	36.2541	0.0812	38.4963	0.326	0.0156	0.5059	23.5603	0.0839	99.3233	73.2834		Cima2_ol57	45.3931	0.0401	40.6612	0.2417	0.051	0.1385	13.2852	0.3476	100.158	85.8971		Cima3_ol91	44.8326	0.0362	40.6602	0.2428	0.0349	0.2165	14.4244	0.1858	100.633	84.7106		Cima4a_ol38	36.7934	0.0153	38.4292	0.258	0.0021	0.3951	24.2335	0.096	100.222	73.0202		Cima4b_ol45	45.2445
Cima1_ol45	42.0201	0.0418	40.0986	0.2125	0.0265	0.2513	16.469	0.1849	99.3048	81.9762		Cima2_ol58	30.2702	0.0724	37.119	0.3641	0.0142	0.6676	31.9657	0.0588	100.532	62.7981		Cima3_ol91	45.5408	0.0391	40.7668	0.2342	0.0208	0.2264	13.9029	0.191	100.922	85.3783		Cima4a_ol38	40.3912	0.0472	39.2824	0.2043	0.0245	0.3058	19.6831	0.1333	100.072	78.5316		Cima4b_ol45	45.5085
Cima1_ol45	42.0719	0.0306	40.1281	0.214	0.0154	0.2374	16.4988	0.1873	99.3835	81.9676		Cima2_ol58	38.4915	0.0251	38.8716	0.2379	0.0133	0.3482	22.3459	0.132	100.466	75.4335		Cima3_ol91	45.5085	0.0453	40.7124	0.2343	0.0364	0.1771	13.3009	0.2061	100.221	85.9136		Cima4a_ol38	41.1194	0.0364	39.6307	0.2144	0.004	0.2392	19.0052	0.1444	100.394	79.4104		Cima4b_ol45	45.4652
Cima1_ol45	41.9694	0.0376	40.0775	0.2113	0.0131	0.2387	16.7936	0.1821	99.5233	81.6678		Cima2_ol58	41.5606	0.0297	39.599	0.2284	0.0104	0.274	18.7354	0.151	100.588	79.8155		Cima3_ol91	45.4669	0.0412	40.6486	0.236	0.0306	0.1991	13.7824	0.2026	100.607	85.4664		Cima4a_ol38	38.0253	0.0583	38.5417	0.2287	0.0193	0.3136	21.7882	0.1338	99.1089	75.6753		Cima4b_ol45	45.4658
Cima1_ol45	41.8193	0.05	40.0672	0.2136	0.0191	0.2755	16.8306	0.1784	99.4536	81.5811		Cima2_ol58	43.09	0.0413	40.0501	0.2358	0.0039	0.2332	16.7326	0.2014	100.588	82.1127		Cima3_ol91	44.8714	0.0424	40.5718	0.2366	0.0251	0.2073	14.3313	0.1938	100.48	84.8054		Cima4a_ol38	40.6826	0.0332	39.3182	0.2119	0.0122	0.2704	19.2696	0.1491	99.9473	79.0067		Cima4b_ol45	45.405
Cima1_ol45	41.7074	0.0331	39.9551	0.2032	0.0153	0.223	17.1579	0.1774	99.4724	81.2492		Cima2_ol58	44.0591	0.027	40.296	0.2443	0.0055	0.1952	15.5967	0.2166	100.64	83.4317		Cima3_ol91	44.1002	0.0463	40.4448	0.2363	0.0368	0.2321	15.2524	0.1616	100.511	83.7508		Cima4a_ol38	41.6645	0.0313	39.8022	0.2186	0.0138	0.2182	18.1488	0.1542	100.252	80.3627		Cima4b_ol45	45.0278
Cima1_ol45	41.2585	0.0396	39.9733	0.2139	0.0221	0.2311	17.318	0.169	99.2255	80.9409		Cima2_ol58	44.3701	0.0491	40.3635	0.2515	0.0162	0.1803	14.8755	0.2252	100.332	84.1698		Cima3_ol91	42.9159	0.0275	40.1954	0.2321	0.0207	0.2414	16.7159	0.1423	100.491	82.0677		Cima4a_ol38	41.6954	0.0416	39.6619	0.2031	0.0075	0.2342	18.4145	0.1456	100.404	80.1439		Cima4b_ol45	38.0633
Cima1_ol45	41.0983	0.0414	39.8683	0.2187	0.0186	0.2584	17.6467	0.1666	99.317	80.5885		Cima2_ol58	44.7177	0.0521	40.5685	0.2339	0.0215	0.2153	14.6141	0.2516	100.675	84.5071		Cima3_ol91	39.7652	0.0156	39.3238	0.2507	0.0009	0.3049	20.7295	0.1024	100.493	77.3731		Cima4a_ol38	37.7962	0.05	38.5725	0.2657	0.0139	0.3837	22.4047	0.137	99.6238	75.0446		Cima4b_ol46	35.1709
Cima1_ol45	40.1089	0.0273	39.8197	0.2244	0.0119	0.2909	18.7795	0.1345	99.3971	79.1979		Cima2_ol58	44.1466	0.0365	40.3081	0.2419	0.0124	0.2149	15.1963	0.2526	100.409	83.8149		Cima3_ol96	38.4625	0.0256	38.9737	0.2962	0.0149	0.3607	22.2477	0.0946	100.476	75.501		Cima4a_ol38	41.6787	0.048	39.7593	0.2148	0.0088	0.2335	18.5407	0.1532	100.637	80.0286		Cima4b_ol46	38.6876
Cima1_ol45	37.315	0.0262	39.0957	0.2678	0.023	0.4007	21.8062	0.0991	99.0338	75.3111		Cima2_ol58	44.1961	0.0352	40.2944	0.2464	0.0187	0.2163	15.108	0.2449	100.36	83.9092		Cima3_ol96	36.427	0.0146	38.6079	0.3928	0.0177	0.3999	24.5301	0.0705	100.46	72.5811		Cima4a_ol38	41.7461	0.0262	39.7323	0.221	0.0108	0.2238	18.2293	0.1553	100.345	80.3236		Cima4b_ol46	40.8992
Cima1_ol46	42.0089	0.038	40.067	0.2182	0.0231	0.2504	16.671	0.1809	99.4576	81.7912														Cima3_ol96	40.6506	0.0273	39.4522	0.2562	0.0194	0.2813	19.437	0.1163	100.24	78.85		Cima4a_ol39	39.8709	0.037	39.1272	0.2105	0.0098	0.2707	20.1943	0.1254	99.8458	77.8735		Cima4b_ol46	41.0726
Cima1_ol46	41.5312	0.0363	39.9	0.2043	0.0177	0.2393	17.1109	0.1769	99.2166	81.2265														Cima3_ol96	38.9422	0.0343	39.1483	0.2622	0.0148	0.3028	21.5079	0.0958	100.308	76.3455		Cima4a_ol39	42.3521	0.0333	39.9038	0.2061	0.0192	0.2068	17.1582	0.1713	100.051	81.4817		Cima4b_ol46	40.9796
Cima1_ol46	41.5317	0.038	39.7396	0.218	0.0132	0.2152	17.4127	0.1714	99.3397	80.9586														Cima3_ol96	39.4169	0.0273	39.3829	0.2572	0.0164	0.3351	21.0974	0.1103	100.644	76.9077		Cima4a_ol39	43.8393	0.0394	40.1583	0.2148	0.0272	0.1993	15.4071	0.2065	100.092	83.5315		Cima4b_ol46	40.9185
Cima1_ol46	41.4505	0.0388	39.7973	0.2075	0.0261	0.232	17.669	0.1564	99.5776	80.7019														Cima3_ol96	38.6305	0.0192	39.284	0.2672	0.0059	0.3128	21.9941	0.0842	100.598	75.7924		Cima4a_ol39	44.5287	0.0466	40.4206	0.2183	0.0408	0.1889	14.3796	0.2434	100.067	84.6628		Cima4b_ol46	41.02
Cima1_ol46	41.3066	0.0537	39.8885	0.2058	0.0162	0.2514	17.6855	0.1552	99.563	80.6329														Cima3_ol96	36.243	0.0205	38.6774	0.3294	0.0078	0.4026	24.9883	0.0801	100.749	72.1096		Cima4a_ol39	45.0521	0.0325	40.5596	0.2231	0.038	0.1838	13.8726	0.2581	100.22	85.2705		Cima4b_ol46	41.009
Cima1_ol46	41.0474	0.0387	40.0064	0.2181	0.0161	0.2639	17.7414	0.1597	99.4915	80.485														Cima3_ol96	36.3314	0.5266	38.9961	0.5616	0.014	0.3798	23.3139	0.0666	100.19	73.5302		Cima4a_ol39	45.0643	0.0399	40.506	0.222	0.0377	0.172	13.7537	0.272	100.068	85.3816		Cima4b_ol46	39.328
Cima1_ol46	40.5398	0.0277	39.5826	0.2151	0.0243	0.271	18.4576	0.1712	99.2892	79.6549														Cima3_ol99	41.096	0.0173	39.6876	0.2559	0.0061	0.2879	18.5279	0.1231	100.002	79.8139		Cima4a_ol39	44.6774	0.0346	40.2425	0.2208	0.0344	0.2122	13.9173	0.2443	99.5834	85.1247		Cima4b_ol46	36.9909
Cima1_ol46	38.7736	0.0315	39.1513	0.2451	0.0135	0.3491	20.6568	0.1154	99.3363	76.9901														Cima3_ol99	42.7128	0.0388	40.1583	0.2371	0.0275	0.2496	17.142	0.1558	100.722	81.6233		Cima4a_ol39	43.4936	0.0392	40.0801	0.2182	0.0283	0.2019	15.7669	0.2289	100.057	83.1004		Cima4b_ol47	40.9002
Cima1_ol46	35.8609	0.0457	38.6086	0.782	-0.0023	0.4518	23.6184	0.0669	99.432	73.0209														Cima3_ol99	33.638	0.0144	37.9687	0.3829	0.016	0.4933	28.0726	0.0596	100.645	68.1121		Cima4a_ol39	38.03	0.0296	38.7509	0.2299	0.009	0.3917	22.8841	0.1148	100.44	74.7627		Cima4b_ol47	44.7111
Cima1_ol47	42.3277	0.0404	39.982	0.2153	0.0231	0.2375	16.6101	0.1932	99.6293	81.958														Cima3_ol99	43.2219	0.0448	40.2517	0.249	0.0321	0.2282	16.5046	0.1563	100.689	82.3577		Cima4a_ol40	40.9296	0.0249	39.6789	0.2208	0.0033	0.2657	19.4066	0.1275	100.657	78.9898		Cima4b_ol47	45.0719
Cima1_ol47	42.0423	0.0256	40.0709	0.2156	0.0203	0.2506	16.8495	0.175	99.6497	81.6442														Cima3_ol99	40.7226	0.0393	39.6762	0.2453	0.0109	0.2842	19.8502	0.124	100.953	78.5269		Cima4a_ol40	42.0182	0.0313	39.9833	0.2164	0.0222	0.2389	18.1966	0.1389	100.846	80.4543		Cima4b_ol47	45.0068
Cima1_ol47	42.0531	0.0355	40.1516	0.2018	0.0114	0.2704	16.8733	0.1868	99.7841	81.6267														Cima3_ol99	42.133	0.0327	40.0184	0.2717	0.0081	0.2403	17.6917	0.1203	100.516	80.9351		Cima4a_ol40	42.018	0.029	39.9486	0.215	0.0135	0.2281	17.9503	0.1445	100.547	80.6675		Cima4b_ol47	45.3091
Cima1_ol47	41.7973	0.0337	39.9155	0.2175	0.0104	0.2552	16.874	0.1722	99.2758	81.5345														Cima3_ol100	43.048	0.0492	40.2266	0.2923	0.0192	0.2205	16.5622	0.1614	100.579	82.2483		Cima4a_ol40	42.618	0.0465	40.0095	0.2098	0.0201	0.234	17.3821	0.1576	100.678	81.3802		Cima4b_ol47	45.0738
Cima1_ol47	41.0266	0.0349	39.8701	0.2094	0.0007	0.251	17.9611	0.1692	99.5229	80.283														Cima3_ol100	44.4821	0.046	40.4305	0.2549	0.0323	0.2307	14.8058	0.1806	100.463	84.2656		Cima4a_ol40	43.7097	0.0521	40.3272	0.2122	0.026	0.2025	15.801	0.2188	100.549	83.1399		Cima4b_ol47	44.725
Cima1_ol47	40.3375	0.0504	39.7539	0.21	0.0078	0.2756	18.7649	0.1455	99.5457	79.3042														Cima3_ol100	44.7073	0.0407	40.2779	0.2511	0.0319	0.2216	14.2872	0.1739	99.9915	84.7978		Cima4a_ol40	44.0231	0.0468	40.3799	0.2116	0.0208	0.2129	15.4278	0.212	100.535	83.5705		Cima4b_ol47	43.3235
Cima1_ol47	39.5952	0.0314	39.4177	0.2499	0.0075	0.3073	19.5808	0.1304	99.3203	78.2826														Cima3_ol100	42.796	0.032	40.1896	0.2447	0.0187	0.2371	16.8596	0.1372	100.515	81.9001		Cima4a_ol40	42.7591	0.055	40.0379	0.2065	0.0293	0.195	16.8225	0.1481	100.253	81.9198		Cima4b_ol47	41.2648
Cima1_ol47	39.4198	0.0223	39.5664	0.256	0.0182	0.3058	20.0802	0.1202	99.7889	77.7749														Cima3_ol100	36.7337	0.0353	38.6009	0.3323	0.0052	0.381	23.6061	0.0856	99.7802	73.5023		Cima4a_ol40	42.0856	0.0314	39.7955	0.2155	0.0108	0.2549	18.07	0.1419	100.606	80.5888		Cima4b_ol47	37.4145
Cima1_ol47	35.155	0.0372	38.6053	0.4127	-0.0028	0.5465	24.9543	0.0519	99.7602	71.5202														Cima3_ol102	43.2604	0.0307	40.2354	0.2386	0.0323	0.2352	16.6044	0.1488	100.786	82.283		Cima4a_ol40	41.9532	0.0327	39.823	0.2099	0.0124	0.2492	17.9946	0.1476	100.423	80.605		Cima4b_ol49	41.5925
Cima1_ol48	42.8512	0.0546	40.3167	0.2084	0.0037	0.2052	15.7311	0.1845	99.5553	82.9228														Cima3_ol102	43.9458	0.0466	40.3065	0.2423	0.0138	0.207	15.8582	0.1515	100.772	83.1647		Cima4a_ol40	41.3266	0.0265	39.7447	0.218	0.0096	0.2607	18.8834	0.1381	100.608	79.5969		Cima4b_ol49	42.164
Cima1_ol48	42.3168	0.0388	40.1053	0.2072	0.0052	0.1856	16.0711	0.1633	99.0933	82.4369														Cima3_ol102	44.5121	0.0481	40.3033	0.2384	0.0306	0.1954	14.7485	0.2048	100.281	84.326		Cima4a_ol41	39.0624	0.0311	39.272	0.2312	0.0206	0.3475	21.5945	0.1278	100.687	76.3288		Cima4b_ol49	42.4497
Cima1_ol48	42.4062	0.045	40.0928	0.2184	0.0103	0.2346	16.3056	0.1972	99.5102	82.2571														Cima3_ol102	46.0909	0.0415	40.782	0.2357	0.0384	0.1542	12.9328	0.236	100.512	86.3998		Cima4a_ol41	41.4816	0.0358	39.7554	0.2187	0.0149	0.2605	18.6689	0.1472	100.583	79.8422		Cima4b_ol49	42.2091
Cima1_ol48	41.0504	0.0565	41.2857	0.3089	0.0087	0.2082	16.6408	0.1655	99.7248	81.4726														Cima3_ol102	45.9408	0.0424	40.6771	0.2337	0.0402	0.1843	12.7909	0.2476	100.157	86.4912		Cima4a_ol41	41.8978	0.0246	39.9083	0.2102	0.0112	0.2488	18.2328	0.1509	100.685	80.3779		Cima4b_ol49	40.518
Cima1_ol48	41.4903	0.033	39.9668	0.2209	0.01	0.2658	17.1251	0.1897	99.3016	81.1989														Cima3_ol102	45.8392	0.0336	40.659	0.2523	0.0282	0.1507	12.9222	0.251	100.136	86.3452		Cima4a_ol41	42.2493	0.0439	40.0328	0.2152	0.0126	0.2482	17.8569	0.1367	100.796	80.8342		Cima4b_ol49	41.7273
Cima1_ol49	42.3966	0.0418	40.2248	0.2058	0.0161	0.2453	16.2264	0.1918	99.5485	82.3245														Cima3_ol102	44.7723	0.0841	40.397	0.3424	0.0406	0.1878	13.7795	0.2191	99.8227	85.2766		Cima4a_ol41	42.0987	0.0353	39.9075	0.2328	0.02	0.2415	18.1496	0.122	100.807	80.525		Cima4b_ol49	41.1451
Cima1_ol49	41.9969	0.049	39.9957	0.2062	0.0184	0.2397	16.4254	0.1613	99.0926	82.0071														Cima3_ol102	44.6003	0.0325	40.5619	0.239	0.0289	0.2187	14.489	0.2167	100.387	84.5849		Cima4a_ol41	41.7524	0.0503	39.8246	0.2307	0.0033	0.2603	18.3622	0.0811	100.565	80.2109		Cima4b_ol49	41.9186
Cima1_ol49	41.8046	0.0482	39.9972	0.216	0.0144	0.2508	16.6802	0.1932	99.2045	81.7105														Cima3_ol102	42.5936	0.0301	39.7789	0.2391	0.0326	0.2297	17.1853	0.1402	100.23	81.5435		Cima4a_ol41	40.6801	0.0339	39.57	0.2096	0.0123	0.2751	19.8767	0.1369	100.795	78.4866		Cima4b_ol49	40.0336
Cima1_ol49	41.8501	0.0381	40.0916	0.1989	0.013	0.2587	16.7429	0.1729	99.3663	81.6704														Cima3_ol103	34.6167	0.0124	38.1443	0.3974	0.0087	0.4383	26.5178	0.0568	100.192	69.943		Cima4a_ol42	35.8985	0.0194	38.2464	0.3045	0.0028	0.396	25.2989	0.0797	100.246	71.6668		Cima4b_ol50	37.4744
Cima1_ol49	40.8478	0.0325	39.7778	0.2018	0.0102	0.2537	17.9805	0.1669	99.2712	80.1967														Cima3_ol103	41.8869	0.0357	39.8824	0.3159	0.0178	0.2586	18.1506	0.1322	100.68	80.4448		Cima4a_ol42	39.8749	0.0363	39.1985	0.2084	0.0029	0.2964	20.8403	0.0513	100.509	77.3279		Cima4b_ol50	38.4504
Cima1_ol49	40.8704	0.0312	39.8211	0.2042	0.0041	0.2633	18.0378	0.1812	99.4134	80.1548														Cima3_ol103	44.0467	0.0204	40.3748	0.2515	0.027	0.2152	15.3006	0.1748	100.411	83.6912		Cima4a_ol42	39.712	0.0365	39.1507	0.2007	0.0059	0.2378	21.1989	0.0495	100.592	76.955		Cima4b_ol50	39.3548
Cima1_ol49	39.8181	0.034	39.6134	0.2252	0.0167	0.3129	19.3053	0.1425	99.4682	78.6173														Cima3_ol103	45.2137	0.053	40.6888	0.2397	0.0427	0.1934	13.9891	0.2016	100.622	85.2104		Cima4a_ol42	39.4129	0.0189	39.177	0.1863	0.0075	0.2761	21.2591	0.0463	100.384	76.7701		Cima4b_ol50	38.9513
Cima1_ol49	39.4687	0.0282	39.4049	0.2397	0.0114	0.3088	19.5141	0.1338	99.1096	78.2863														Cima3_ol103	45.4985	0.0388	40.7314	0.2392	0.0289	0.1787	13.53	0.2268	100.472	85.7028		Cima4a_ol42	37.969	0.0407	38.8963	0.2159	-0.0023	0.3206	22.8823	0.0607	100.383	74.7339		Cima4b_ol50	38.9018
Cima1_ol49	36.6032	0.0107	38.9345	0.3322	-0.0027	0.4825	23.2344	0.088	99.6827	73.7414														Cima3_ol103	44.0114	0.6959	40.3926	1.0715	0.0148	0.1964	14.1027	0.1837	100.669	84.7632		Cima4a_ol42	38.3408	0.0203	38.8668	0.2392	0.0037	0.3418	22.4582	0.0655	100.336	75.2675		Cima4b_ol50	37.9296
Cima1_ol50	43.4175	0.0563	40.3334	0.2504	0.0206	0.1983	14.8636	0.1764	99.3165	83.8892														Cima3_ol103	45.3794	0.0313	40.3697	0.2279	0.0368	0.1915	13.7681	0.2192	100.224	85.4552		Cima4a_ol42	39.6319	0.0318	39.4487	0.1934	0.0126	0.2814	21.0324	0.0473	100.68	77.0588		Cima4b_ol50	37.5369
Cima1_ol50	42.3922	0.04	40.221	0.2066	0.0216	0.2016	16.1282	0.2052	99.4164	82.4113														Cima3_ol103	45.0315	0.0313	40.6324	0.2672	0.0214	0.2107	14.0914	0.2008	100.487	85.0669		Cima4a_ol42	39.822	0.0444	39.3274	0.1918	0.0073	0.2744	21.064	0.0544	100.786	77.1169		Cima4b_ol50	36.7521
Cima1_ol50	42.1743	0.054	40.1342	0.2073	0.0207	0.2115	16.3227	0.1903	99.315	82.1616														Cima3_ol107	42.1137	0.097	40.7623	0.2623	0.0187	0.2191	17.0195	0.1249	100.618	81.5187		Cima4a_ol42	39.7855	0.0442	39.4072	0.2043	0.0083	0.2535	20.7965	0.0607	100.56	77.3256		Cima4b_ol50	35.907
Cima1_ol50	40.5461	0.0386	39.7054	0.217	0.0177	0.2459	18.3538	0.1697	99.294	79.7489														Cima3_ol107	43.5687	0.0284	40.3006	0.237	0.0189	0.2249	15.9518	0.142	100.472	82.9605		Cima4a_ol42	39.3014	0.0459	39.2324	0.246	0.0054	0.3133	21.1078	0.0682	100.32	76.8469		Cima4b_ol50	33.2417
Cima1_ol50	39.9	0.0363	39.5996	0.2284	0.0126	0.2918	18.9766	0.1528	99.198	78.9386														Cima3_ol107	44.2398	0.028	40.4645	0.2437	0.0353	0.2095	15.2147	0.1763	100.612	83.8271		Cima4a_ol43	43.9999	0.0369	40.2833	0.2174	0.0329	0.2161	15.1372	0.2064	100.13	83.8226		Cima4b_ol51	37.5109
Cima1_ol51	41.459	0.0405	40.014	0.2255	0.0231	0.2392	17.1687	0.1654	99.3354	81.1485														Cima3_ol107	44.4337	0.0433	40.4544	0.2351	0.0308	0.2445	14.9152	0.1877	100.545	84.1533		Cima4a_ol43	44.2889	0.0322	40.1888	0.2203	0.0181	0.2055	14.8726	0.218	100.044	84.1478		Cima4b_ol51	37.1245
Cima1_ol51	41.3696	0.0317	40.0113	0.2224	0.013	0.2564	17.3052	0.1581	99.3676	80.9938														Cima3_ol107	44.0529	0.0353	40.3053	0.2347	0.0213	0.2204	15.3596	0.1774	100.407	83.6406		Cima4a_ol43	44.2595	0.0462	40.313	0.22	0.0169	0.1915	14.9247	0.2037	100.175	84.0922		Cima4b_ol51	39.3895
Cima1_ol51	41.2273	0.0337	39.9554	0.2193	0.0176	0.2132	17.303	0.1618	99.1313	80.9427														Cima3_ol107	42.5752	0.0307	39.2036	0.2468	0.0186	0.2888	18.4546	0.1239	100.942	80.4399		Cima4a_ol43	44.2094	0.0439	40.3913	0.2133	0.0148	0.1727	15.0578	0.2072	100.31	83.9579		Cima4b_ol51	40.7306
Cima1_ol51	39.1496	0.023	39.399	0.2782	0.0075	0.3546	20.0418	0.1044	99.3583	77.6891														Cima3_ol107	38.9173	0.0172	39.099	0.2453	0.0057	0.3477	21.8627	0.0893	100.584	76.0373		Cima4a_ol43	44.1352	0.0371	40.3627	0.2264	0.0166	0.2163	15.0105	0.206	100.211	83.9777		Cima4b_ol51	41.1184
Cima1_ol51	38.8948	0.0259	39.3206	0.2662	0.0167	0.3433	20.1449	0.1258	99.1383	77.4861														Cima3_ol108	42.1435	0.0265	39.9523	0.2393	0.0162	0.2589	17.9328	0.1242	100.694	80.7293		Cima4a_ol43	44.2209	0.0383	40.382	0.2288	0.0194	0.1838	15.2025	0.2019	100.478	83.8325		Cima4b_ol51	41.1414
Cima1_ol53	44.022	0.0276	40.616	0.2422	0.0177	0.1619	14.1642	0.2194	99.4709	84.7101														Cima3_ol108	44.6965	0.0374	40.6242	0.2476	0.0335	0.2016	14.86	0.1586	100.859	84.281		Cima4a_ol43	44.1176	0.0478	40.6394	0.216	0.0234	0.202	15.4584	0.2041	100.909	83.5726		Cima4b_ol51	41.3175
Cima1_ol53	43.9501	0.0354	40.7	0.2418	0.0336	0.1689	14.1879	0.2415	99.5593	84.6672														Cima3_ol108	44.9092	0.0351	40.6893	0.2618	0.0109	0.2047	14.528	0.1245	100.764	84.6398		Cima4a_ol43	43.9056	0.038	40.3897	0.2229	0.0178	0.2186	15.8233	0.1912	100.807	83.1826		Cima4b_ol51	41.415
Cima1_ol53	43.594	0.0482	40.5262	0.2576	0.0336	0.1913	14.8717	0.2144	99.7369	83.9365														Cima3_ol108	44.9617	0.0378	40.6531	0.2514	0.03	0.2062	14.5993	0.1121	100.852	84.5913		Cima4a_ol43	42.7387	0.0395	40.1123	0.2281	0.0184	0.2256	16.7396	0.1777	100.28	81.9858		Cima4b_ol51	40.9296
Cima1_ol53	43.2657	0.0288	40.2176	0.248	0.0391	0.2018	14.8754	0.2528	99.1291	83.831														Cima3_ol108	44.7482	0.0261	40.7268	0.246	0.0255	0.203	14.4506	0.1427	100.569	84.6625		Cima4a_ol43	38.8107	0.0274	39.2541	0.207	0.0187	0.316	22.0431	0.1248	100.802	75.8369		Cima4b_ol51	38.5477
Cima1_ol53	43.1681	0.0493	40.3274	0.2286	0.025	0.199	14.9569	0.2216	99.1759	83.7263														Cima3_ol108	44.7446	0.0506	40.5528	0.2579	0.0155	0.1778	14.7356	0.144	100.679	84.4061														Cima4b_ol52	38.4688
Cima1_ol53	41.6618	0.3616	39.9532	1.1429	0.0199	0.1979	16.0307	0.183	99.5511	82.2466														Cima3_ol108	44.416	0.0309	40.5547	0.2484	0.021	0.2329	14.8131	0.1666	100.484	84.2393														Cima4b_ol52	43.1774
Cima1_ol53	39.5914	0.024	39.4673	0.2393	0.0124	0.3811	19.3435	0.1325	99.1916	78.4876														Cima3_ol108	29.2737	0.1182	35.6128	0.4015	0.0001	0.5836	33.1641	0.0425	99.1965	61.1421		Cima4_xeno49	49.0578	0.008	42.1191	0.0813	0.0227	0.1101	8.3787	0.3836	100.161	91.2565		Cima4b_ol52	43.1362
Cima1_ol54	43.58	0.0483	40.5081	0.226	0.0392	0.2086	14.4984	0.2467	99.3552	84.2721														Cima3_ol109	33.6005	0.0142	38.0761	0.3312	0.0019	0.4674	27.5626	0.06	100.114	68.4849		Cima4_xeno35	49.2625	0.0173	41.7201	0.0832	0.0161	0.0801	8.4838	0.3781	100.041	91.1901		Cima4b_ol52	40.9714
Cima1_ol54	43.2434	0.0605	40.4543	0.2113	0.0338	0.2087	14.8806	0.2327	99.3252	83.8193														Cima3_ol109	30.609	0.0332	37.3927	0.5783	-0.0006	0.5551	31.4325	0.0494	100.65	63.4486		Cima4_xeno9	49.2139	0.0144	41.7739	0.0806	0.0356	0.1548	8.4919	0.3993	100.164	91.1745		Cima4b_ol52	39.088
Cima1_ol54	42.9941	0.0594	40.2229	0.2141	0.0283	0.2128	15.481	0.2443	99.457	83.1952														Cima3_ol109	34.8736	0.063	38.457	0.3441	0.0122	0.438	26.2765	0.063	100.528	70.2894		Cima4_xeno43	49.4875	0.0157	41.9345	0.0798	0.0304	0.117	8.5481	0.3893	100.602	91.1658		Cima4b_ol52	43.3108
Cima1_ol54	42.8273	0.0296	40.3247	0.211	0.0213	0.2289	15.7188	0.2067	99.5683	82.9257														Cima3_ol109	29.0845	0.0124	37.1437	0.3941	0.0032	0.5956	32.9956	0.0346	100.263	61.1091		Cima4_xeno33	49.2669	0.014	42.0457	0.0848	0.0185	0.1318	8.5149	0.3865	100.463	91.1615		Cima4b_ol52	43.4143
Cima1_ol54	42.2301	0.0283	40.2011	0.2119	0.0172	0.2385	16.5933	0.1805	99.7011	81.9386														Cima3_ol109	37.6171	0.0194	38.9584	0.3243	0.0047	0.3808	23.2407	0.0812	100.626	74.2618		Cima4_xeno25	49.4257	0.0159	41.9658	0.0786	0.0175	0.1409	8.5511	0.3792	100.575	91.153		Cima4b_ol52	41.9476
Cima1_ol54	42.1061	0.0364	40.1013	0.2117	0.0255	0.2445	16.6429	0.1995	99.5677	81.8509														Cima3_ol109	39.1667	0.0207	39.2576	0.2841	0.0149	0.3471	21.6009	0.0867	100.779	76.3714		Cima4_xeno46	49.0602	0.0096	41.7857	0.0805	0.0187	0.1073	8.489	0.3888	99.9397	91.1521		Cima4b_ol52	38.7819
Cima1_ol54	41.9759	0.0353	40.2238	0.2124	0.0206	0.2025	16.7069	0.1892	99.5667	81.7476														Cima3_ol110	42.8424	0.0372	39.8084	0.2265	0.015	0.244	17.1944	0.1342	100.502	81.6231		Cima4_xeno31	49.3371	0.0164	41.8906	0.081	0.0155	0.1413	8.5389	0.3818	100.403	91.15		Cima4b_ol52	34.0549
Cima1_ol54	39.8882	0.0175	39.7928	0.2247	0.0162	0.3164	19.3979	0.1401	99.7937	78.5664														Cima3_ol110	44.7937	0.0424	40.5669	0.249	0.0261	0.1792	14.6411	0.1705	100.669	84.5051		Cima4_xeno45	49.3665	0.0198	41.9251	0.0766	0.0198	0.0735	8.5473	0.3907	100.419	91.1471		Cima4b_ol53	36.4646
Cima1_ol54	37.4554	0.0374	39.1763	0.3076	0.0195	0.5433	21.9753	0.0566	99.5714	75.237														Cima3_ol110	45.0378	0.0406	40.5216	0.245	0.0267	0.2017	13.9312	0.1797	100.184	85.2133		Cima4_xeno30	49.0873	0.0177	42.13	0.0815	0.017	0.1194	8.5016	0.3852	100.34	91.1445		Cima4b_ol53	39.2826
Cima1_ol56	42.3139	0.0389	40.2701	0.2081	0.0141	0.2099	16.099	0.1873	99.3413	82.4106														Cima3_ol110	45.904	0.0399	40.7168	0.2332	0.0363	0.1865	13.0313	0.1938	100.342	86.2625		Cima4_xeno37	49.4337	0.0071	41.9119	0.0791	0.0301	0.1293	8.5642	0.38	100.535	91.1421		Cima4b_ol53	41.0549
Cima1_ol56	42.3794	0.0522	40.1991	0.2057	0.0065	0.2219	16.1685	0.153	99.3863	82.3707														Cima3_ol110	45.3919	0.0366	40.6412	0.2266	0.0432	0.1667	13.4573	0.2096	100.173	85.7402		Cima4_xeno5	49.3401	0.0115	41.8674	0.0794	0.0154	0.1097	8.5496	0.3883	100.361	91.1407		Cima4b_ol53	41.6628
Cima1_ol56	42.4087	0.0473	40.2605	0.211	0.0189	0.2164	16.2041	0.1725	99.5394	82.3486														Cima3_ol110	44.9077	0.0339	40.3566	0.2404	0.0222	0.1774	14.5377	0.1896	100.466	84.6306		Cima4_xeno41	49.2605	0.0042	41.9564	0.0803	0.0188	0.145	8.5544	0.3773	100.397	91.1229		Cima4b_ol53	41.6173
Cima1_ol56	42.2572	0.038	40.3828	0.2103	-0.0009	0.2656	16.2116	0.1658	99.5304	82.2897														Cima3_ol110	44.8447	0.0432	40.4509	0.2441	0.0371	0.2058	14.4058	0.1711	100.403	84.7307		Cima4_xeno26	49.0496	0.0149	41.833	0.0777	0.0143	0.1166	8.5195	0.3921	100.018	91.1213		Cima4b_ol53	41.6127
Cima1_ol56	42.2894	0.0436	40.3871	0.2268	0.0018	0.226	16.312	0.1526	99.6393	82.2109														Cima3_ol110	44.4724	0.0294	40.3931	0.2424	0.0213	0.227	14.9299	0.1691	100.485	84.1518		Cima4_xeno40	49.1093	0.007	41.694	0.0849	0.0291	0.1138	8.5342	0.3773	99.9496	91.1173		Cima4b_ol53	41.5141
Cima1_ol56	41.9644	0.0269	40.0522	0.2143	0.0135	0.2678	16.6964	0.1738	99.4094	81.7528														Cima3_ol111	43.1174	0.0229	40.1119	0.228	0.0276	0.2383	16.6213	0.1748	100.542	82.2198		Cima4_xeno21	49.3286	0.0121	41.8955	0.0839	0.0243	0.1347	8.5737	0.3968	100.45	91.1157		Cima4b_ol53	41.8984
Cima1_ol56	41.6997	0.0356	40.2063	0.2141	0.0146	0.2097	17.1525	0.1763	99.7086	81.2512														Cima3_ol111	45.5592	0.0338	40.7389	0.2281	0.0365	0.1966	13.3823	0.2263	100.401	85.8533		Cima4_xeno19	49.4286	0.0119	41.9879	0.0808	0.0258	0.1238	8.5935	0.3817	100.634	91.1137		Cima4b_ol53	41.729
Cima1_ol56	40.817	0.0337	39.7384	0.2185	0.028	0.2707	17.8122	0.1656	99.084	80.3337														Cima3_ol111	46.3354	0.0338	40.9355	0.2253	0.0472	0.1774	12.561	0.243	100.559	86.7996		Cima4_xeno47	49.4453	0.0121	42.1041	0.0834	0.0226	0.1321	8.5965	0.3799	100.776	91.1136		Cima4b_ol53	38.7746
Cima1_ol56	38.3349	0.0376	39.8276	0.2658	0.0057	0.3773	20.9858	0.0889	99.9236	76.5052														Cima3_ol111	46.0322	0.0379	40.9044	0.2313	0.0394	0.1868	13.0715	0.2526	100.756	86.259		Cima4_xeno36	49.2683	0.0078	41.8015	0.0769	0.0239	0.1238	8.57	0.3924	100.265	91.1094		Cima4b_ol54	35.1561
Cima1_ol57	42.2428	0.0428	40.0546	0.2165	0.0236	0.2333	16.2451	0.1869	99.2455	82.2547														Cima3_ol111	44.1057	0.0369	40.2493	0.2233	0.0379	0.1851	15.1303	0.2047	100.173	83.8614		Cima4_xeno11	49.2087	0.0182	41.684	0.0827	0.029	0.1101	8.5603	0.3922	100.085	91.109		Cima4b_ol54	39.2752
Cima1_ol57	42.1924	0.0401	40.1172	0.2382	0.0074	0.2179	16.2302	0.1862	99.2295	82.2507														Cima3_ol111	45.2431	0.0489	40.5406	0.2331	0.0369	0.2092	13.8829	0.2304	100.425	85.314		Cima4_xeno34	49.1642	0.0017	41.8726	0.0781	0.0181	0.1158	8.5528	0.3954	100.199	91.1085		Cima4b_ol54	40.9999
Cima1_ol57	42.1684	0.0271	40.0794	0.217	0.0213	0.2526	16.2447	0.1809	99.1914	82.2294														Cima3_ol111	44.7614	0.0283	40.4652	0.233	0.0318	0.1753	14.777	0.2061	100.678	84.3742		Cima4_xeno32	49.2744	0.005	42.1137	0.0787	0.0263	0.1336	8.5742	0.3887	100.595	91.1065		Cima4b_ol54	41.4223
Cima1_ol57	42.2613	0.0394	40.0283	0.2151	0.0165	0.2014	16.2888	0.1867	99.2375	82.2221														Cima3_ol111	41.3394	0.0265	39.4437	0.2575	0.0206	0.2696	18.7817	0.139	100.278	79.6894		Cima4_xeno39	49.047	0.0092	41.907	0.0798	0.029	0.1149	8.5368	0.3835	100.107	91.1046		Cima4b_ol54	40.9199
Cima1_ol57	42.0461	0.027	40.0082	0.2062	0.016	0.2332	16.3228	0.1902	99.0497	82.1165														Cima3_ol114	42.0028	0.0224	39.9604	0.2355	0.0127	0.3125	17.9762	0.127	100.65	80.6396		Cima4_xeno1	49.4677	0.0104	42.09	0.0823	0.0329	0.1418	8.6155	0.3801	100.821	91.0992		Cima4b_ol54	39.5222
Cima1_ol57	41.5773	0.0373	39.8766	0.2012	0.0155	0.255	16.9436	0.1743	99.0808	81.3926														Cima3_ol114	43.4115	0.0479	40.3753	0.2551	0.0201	0.2284	16.3675	0.1356	100.841	82.5418		Cima4_xeno29	49.2196	0.0049	41.9967	0.0818	0.0176	0.1183	8.5738	0.3861	100.399	91.0978		Cima4b_ol54	40.7667
Cima1_ol57	41.3676	0.0394	40.4749	0.2087	0.0167	0.2394	17.1146	0.1768	99.638	81.163														Cima3_ol114	43.2589	0.0376	40.1602	0.2602	0.0243	0.2117	16.3365	0.1472	100.437	82.5182		Cima4_xeno7	49.3807	0.0119	41.9263	0.0833	0.0258	0.1411	8.6023	0.3807	100.552	91.0975		Cima4b_ol54	40.3946
Cima1_ol57	37.6068	0.0202	39.1057	0.2617	0.0058	0.3605	21.5881	0.0866	99.0354	75.6412														Cima3_ol114	43.1649	0.301	40.169	0.2692	0.0718	0.2108	16.4872	0.1319	100.806	82.3538		Cima4_xeno13	49.2538	0.0242	42.2177	0.0773	0.0312	0.1461	8.5854	0.3942	100.73	91.0926		Cima4b_ol54	37.9413
Cima1_ol58	44.6708	0.0601	40.7072	0.2337	0.0317	0.1709	13.099	0.3067	99.2801	85.8739														Cima3_ol114	42.3228	0.027	39.9907	0.3218	0.0384	0.2442	17.7417	0.1189	100.806	80.9608		Cima4_xeno38	48.9572	0.0089	41.9753	0.0811	0.0196	0.1216	8.5379	0.3973	100.099	91.0884		Cima4b_ol54	34.2216
Cima1_ol58	44.2998	0.049	40.562	0.2293	0.0327	0.2026	13.6451	0.2803	99.3008	85.2665														Cima3_ol114	43.6168	0.0364	40.3724	0.2568	0.0253	0.2245	16.1062	0.1462	100.785	82.8395		Cima4_xeno23	49.381	0.0071	41.8737	0.0808	0.0234	0.1163	8.6189	0.394	100.495	91.0819		Cima4b_ol55	34.4769
Cima1_ol58	44.253	0.0473	40.5619	0.2289	0.0407	0.1878	13.6368	0.285	99.2414	85.261														Cima3_ol114	43.6061	0.0395	40.4282	0.2485	0.0206	0.2228	16.2226	0.1501	100.938	82.7336		Cima4_xeno12	48.7935	0.0158	41.9584	0.0796	0.0273	0.1185	8.5244	0.3772	99.8949	91.0743		Cima4b_ol55	35.2375
Cima1_ol58	42.9452	0.0459	40.2011	0.2035	0.0142	0.202	15.5753	0.2183	99.4055	83.0939														Cima3_ol116	42.9233	0.0251	39.9403	0.2387	0.0165	0.2348	16.9347	0.1437	100.457	81.8781		Cima4_xeno2	48.7541	0.0067	42.007	0.0805	0.0172	0.1113	8.5187	0.3825	99.8779	91.0731		Cima4b_ol55	36.0238
Cima1_ol58	41.6187	0.0418	39.8727	0.1969	0.0112	0.2519	16.9311	0.1789	99.1033	81.4188														Cima3_ol116	44.0953	0.0446	40.2362	0.24	0.0255	0.1949	15.1628	0.1781	100.177	83.8292		Cima4_xeno18	49.1924	0.0147	41.9253	0.0811	0.021	0.1226	8.6001	0.3893	100.347	91.0685		Cima4b_ol55	37.19
Cima1_ol58	41.4549	0.0305	39.9072	0.2102	0.0173	0.2459	17.3854	0.1725	99.4239	80.9542														Cima3_ol116	44.8241	0.0316	40.546	0.2366	0.0287	0.1941	14.6255	0.1991	100.686	84.5278		Cima4_xeno44	49.1189	0.0079	42.107	0.0821	0.0217	0.1118	8.5899	0.3867	100.426	91.0659		Cima4b_ol55	38.1419
Cima1_ol58	40.2665	0.0375	39.5238	0.2242	0.0228	0.2753	18.7181	0.1543	99.2226	79.3161														Cima3_ol116	43.3449	0.0291	40.0455	0.2569	0.0264	0.2436	16.2047	0.1767	100.328	82.6635		Cima4_xeno50	48.8805	0.0141	41.7754	0.0823	0.0212	0.1443	8.5493	0.3821	99.8492	91.065		Cima4b_ol55	39.8402
Cima1_ol59	44.6695	0.035	40.6835	0.2798	0.0561	0.1519	13.1466	0.2659	99.2883	85.8294														Cima3_ol116	43.0207	0.041	39.7721	0.2411	0.0161	0.2112	16.6196	0.1475	100.069	82.1883		Cima4_xeno16	49.1195	0.0036	41.8254	0.0833	0.0236	0.1558	8.5916	0.3898	100.192	91.0646		Cima4b_ol55	40.783
Cima1_ol59	44.4121	0.0375	40.6589	0.2417	0.0332	0.1925	13.4275	0.2905	99.2941	85.4988														Cima3_ol116	42.6686	0.0387	39.8333	0.2357	0.0246	0.2563	17.0519	0.1379	100.247	81.6868		Cima4_xeno24	49.029	0.0184	41.9789	0.0771	0.0259	0.1073	8.5851	0.3912	100.213	91.0555		Cima4b_ol55	40.1932
Cima1_ol59	43.8573	0.0373	40.5469	0.2731	0.0357	0.1934	14.209	0.1828	99.3355	84.6203														Cima3_ol116	42.2993	0.0371	39.5857	0.2467	0.0165	0.2729	17.667	0.1342	100.259	81.0174		Cima4_xeno15	49.5147	0.0153	41.9232	0.0787	0.0194	0.1572	8.6799	0.3846	100.773	91.0464		Cima4b_ol55	38.5033
Cima1_ol59	43.6469	0.0314	40.459	0.2757	0.0381	0.2103	14.2623	0.1985	99.1222	84.5086														Cima3_ol116	39.1275	0.0228	38.9004	0.2932	0.0163	0.3453	21.5926	0.0985	100.397	76.3603		Cima4_xeno17	49.333	0.0148	41.9808	0.0796	0.0218	0.0949	8.6495	0.3796	100.554	91.045		Cima4b_ol55	32.8208
Cima1_ol59	42.7705	0.0552	40.3437	0.2176	0.0242	0.2172	15.6479	0.1634	99.4398	82.9711														Cima3_ol121	42.4627	0.0376	39.8724	0.2572	0.0077	0.2466	17.4844	0.1095	100.478	81.2354		Cima4_xeno42	49.2039	0.0162	41.7373	0.0825	0.0224	0.1176	8.6327	0.3815	100.194	91.0396		Cima4b_ol56	35.4088
Cima1_ol59	41.1685	0.0461	39.8787	0.2014	0.0214	0.2588	17.2847	0.1719	99.0314	80.9368														Cima3_ol121	42.3052	0.0468	39.8581	0.2441	0.0252	0.2289	17.5741	0.0926	100.375	81.1004		Cima4_xeno8	49.1811	0.0106	41.9549	0.0802	0.0114	0.1048	8.6645	0.3904	100.398	91.0058		Cima4b_ol56	39.3443
Cima1_ol60	44.3138	0.0493	40.7335	0.2226	0.0367	0.1589	13.2843	0.297	99.096	85.6039														Cima3_ol121	42.6568	0.0441	40.0049	0.2451	0.0087	0.2488	17.6525	0.0835	100.944	81.1589		Cima4_xeno28	49.0981	0.0151	42.0313	0.0835	0.0206	0.1153	8.6523	0.3877	100.404	91.0036		Cima4b_ol56	40.827
Cima1_ol60	44.1877	0.0395	40.6686	0.2307	0.0376	0.1809	13.5637	0.2847	99.1932	85.31														Cima3_ol121	42.3278	0.0295	39.8392	0.2464	0.0201	0.2253	17.6347	0.0965	100.42	81.0557		Cima4_xeno14	48.9338	0.0108	42.032	0.084	0.0243	0.1498	8.6248	0.3937	100.253	91.0023		Cima4b_ol56	41.0336
Cima1_ol60	44.0014	0.0391	40.6779	0.222	0.0381	0.1864	13.8464	0.2636	99.2747	84.9956														Cima3_ol121	41.8126	0.038	39.7184	0.2627	0.0106	0.2685	18.3203	0.088	100.519	80.2699		Cima4_xeno20	49.1788	0.0107	42.0101	0.0793	0.0183	0.1233	8.6703	0.3847	100.475	91		Cima4b_ol56	41.3205
Cima1_ol60	42.5079	0.0435	40.2986	0.2024	0.009	0.1982	15.609	0.2052	99.0737	82.9192														Cima3_ol121	42.0384	0.0518	39.7048	0.247	0.0149	0.2355	18.3119	0.0832	100.687	80.3623		Cima4_xeno10	49.0407	0.0224	42.0837	0.0806	0.014	0.1206	8.6503	0.3966	100.409	90.9958		Cima4b_ol56	41.2056
Cima1_ol60	41.8134	0.0289	40.1198	0.2157	0.025	0.2319	16.5333	0.2312	99.1993	81.8452														Cima3_ol121	42.2421	0.0351	39.8809	0.2501	0.0053	0.2876	17.9493	0.0937	100.744	80.7513		Cima4_xeno48	49.0984	0.02	41.6203	0.0786	0.0247	0.1425	8.6657	0.3921	100.042	90.9908		Cima4b_ol56	38.3533
Cima1_ol60	41.4923	0.0264	39.8715	0.2051	0.0165	0.2066	17.0588	0.1673	99.0445	81.2587														Cima3_ol121	41.8967	0.0304	39.7628	0.2578	0.0102	0.2089	17.9716	0.0953	100.234	80.604		Cima4_xeno4	49.083	0.0096	41.9292	0.0782	0.0262	0.1372	8.6725	0.3861	100.322	90.9819		Cima4b_ol56	40.7577
Cima1_ol61	42.2584	0.0546	40.1477	0.2157	0.0247	0.2208	16.2649	0.1825	99.3693	82.2424														Cima3_ol121	41.444	0.0261	39.7842	0.2443	0.0205	0.2702	18.8728	0.1139	100.776	79.652		Cima4_xeno22	49.1388	0.0052	42.094	0.0786	0.0281	0.117	8.684	0.394	100.54	90.9802		Cima4b_ol56	41.5483
Cima1_ol61	42.1223	0.0391	40.2061	0.2268	0.0183	0.1935	16.2979	0.1636	99.2676	82.1656														Cima3_ol124	41.0426	0.0221	39.6259	0.2559	0.0112	0.3159	19.5018	0.1152	100.891	78.9541		Cima4_xeno3	49.4151	0.0087	41.9075	0.079	0.0161	0.1369	8.7468	0.3917	100.702	90.9672		Cima4b_ol56	38.8443
Cima1_ol61	42.1383	0.0356	40.1571	0.2253	0.0079	0.2225	16.3096	0.1647	99.2611	82.1606														Cima3_ol124	41.5001	0.0292	39.7195	0.2429	0.0178	0.2522	18.4284	0.1229	100.313	80.0571		Cima4_xeno6	49.0684	0.0156	41.8493	0.0804	0.0196	0.1216	8.707	0.392	100.254	90.9468		Cima4b_ol57	37.0647
Cima1_ol61	42.0269	0.0472	40.1272	0.2275	0.0189	0.1965	16.2915	0.1794	99.1151	82.1379														Cima3_ol124	41.8972	0.0224	39.9526	0.2396	0.0149	0.2187	17.9822	0.1151	100.443	80.5949														Cima4b_ol57	38.5324
Cima1_ol61	42.1018	0.0456	40.1679	0.2128	0.0181	0.206	16.3262	0.1832	99.2617	82.133														Cima3_ol124	42.4509	0.0266	40.0806	0.2443	0.0041	0.2284	17.6038	0.1085	100.747	81.1273														Cima4b_ol57	38.8172
Cima1_ol61	42.0701	0.0433	40.113	0.2148	0.0211	0.2101	16.3647	0.1722	99.2092	82.0873														Cima3_ol124	42.8311	0.0294	40.2097	0.2527	0.0176	0.2105	17.0052	0.1037	100.66	81.7845														Cima4b_ol57	43.4823
Cima1_ol62	42.6271	0.0313	40.1903	0.2188	0.0006	0.2122	15.7657	0.1668	99.2128	82.8172														Cima3_ol124	42.7397	0.0386	40.0799	0.2664	0.0136	0.2284	17.2945	0.1119	100.773	81.4995														Cima4b_ol57	43.437
Cima1_ol62	42.4889	0.0477	40.2353	0.2175	0.005	0.2276	15.7453	0.1663	99.1335	82.7892														Cima3_ol124	42.6486	0.0369	40.0017	0.2749	0.0208	0.2542	17.5545	0.1172	100.909	81.2409														Cima4b_ol57	43.5909
Cima1_ol62	42.4432	0.0328	40.2452	0.212	0.0116	0.2284	15.7455	0.1606	99.0794	82.7737														Cima3_ol124	35.6351	0.0304	38.3115	0.466	0.0079	0.4361	25.5772	0.0771	100.541	71.2937														Cima4b_ol57	43.2144
Cima1_ol62	42.5551	0.0394	40.094	0.2094	0.0013	0.1929	15.7952	0.1752	99.0626	82.7664														Cima3_ol125	43.9099	0.0468	40.3839	0.2384	0.0288	0.211	15.8571	0.1589	100.835	83.1542														Cima4b_ol57	40.4522
Cima1_ol62	42.6226	0.0458	40.0997	0.2164	0.007	0.235	15.8213	0.1649	99.2126	82.7655														Cima3_ol125	45.9817	0.0364	40.7943	0.2251	0.0408	0.1843	13.1129	0.2133	100.589	86.2084														Cima4b_ol57	35.9494
Cima1_ol62	42.4972	0.0472	40.3069	0.2121	0.0167	0.2381	15.8083	0.1575	99.2841	82.735														Cima3_ol125	46.4225	0.0421	40.9145	0.2435	0.0444	0.1996	12.5393	0.2426	100.648	86.8411														Cima4b_ol58	37.2364
Cima1_ol62	42.5052	0.0527	40.1578	0.2156	0.0014	0.1903	15.8974	0.1695	99.1899	82.6572														Cima3_ol125	45.6871	0.0426	40.7664	0.24	0.0464	0.1863	13.4042	0.241	100.614	85.8673														Cima4b_ol58	40.4193
Cima1_ol62	42.0701	0.0448	39.9002	0.2067	0.0226	0.2297	16.4482	0.1839	99.1062	82.0124														Cima3_ol125	44.4419	0.0433	40.5074	0.2273	0.0381	0.2084	15.134	0.2045	100.805	83.9607														Cima4b_ol58	41.389
Cima1_ol62	39.2255	0.0351	39.5848	0.2397	0.0138	0.346	19.8194	0.1502	99.4145	77.9151														Cima3_ol125	45.4322	0.0473	40.8355	0.2407	0.0374	0.1832	13.8792	0.2096	100.865	85.3697														Cima4b_ol58	40.5439
Cima1_ol63	42.6589	0.0421	40.2166	0.2117	0.0068	0.2197	16.1386	0.1883	99.6827	82.4928														Cima3_ol125	46.0745	0.0374	40.8361	0.2388	0.0404	0.1756	12.9575	0.2355	100.596	86.3733														Cima4b_ol58	41.1621
Cima1_ol63	42.4573	0.0473	39.708	0.2299	0.0247	0.204	16.1957	0.1908	99.0578	82.3729														Cima3_ol125	45.6274	0.0413	40.8255	0.2262	0.0249	0.2062	13.5985	0.2114	100.761	85.6757														Cima4b_ol58	41.1774
Cima1_ol63	42.4995	0.0449	40.2507	0.2181	0.0215	0.2141	16.2686	0.1802	99.6976	82.322														Cima3_ol125	42.3918	0.0356	40.0825	0.2406	0.0184	0.255	17.7556	0.1395	100.919	80.9738														Cima4b_ol58	41.1056
Cima1_ol63	42.4072	0.0413	40.0661	0.2081	0.0111	0.2309	16.3701	0.1722	99.5071	82.1996														Cima3_ol127	42.6427	0.0277	40.1017	0.2285	0.0124	0.2599	17.468	0.1256	100.867	81.3141														Cima4b_ol58	39.3121
Cima1_ol63	42.5118	0.0508	40.2602	0.2182	0.0089	0.2429	16.5452	0.1786	100.017	82.0797														Cima3_ol127	44.1144	0.0328	40.525	0.2293	0.0274	0.1999	15.5983	0.1671	100.894	83.4476														Cima4b_ol58	35.7365
Cima1_ol63	42.2254	0.0516	40.1555	0.2206	0.0207	0.2342	16.6588	0.1831	99.75	81.8788														Cima3_ol127	44.3155	0.0353	40.4829	0.2376	0.0278	0.2177	15.2406	0.1552	100.713	83.8272														Cima4b_ol58	36.0944
Cima1_ol63	41.8662	0.0375	40.0776	0.2212	0.0177	0.2286	16.9574	0.1816	99.5877	81.4851														Cima3_ol127	43.7826	0.0685	40.069	0.2538	0.0339	0.1997	15.0316	0.1551	99.5943	83.8505														Cima4b_ol59	37.1252
Cima1_ol63	41.4962	0.0318	39.9171	0.2212	0.0222	0.2637	17.9495	0.1527	100.055	80.4726														Cima3_ol127	44.0634	0.0336	40.3719	0.2467	0.0291	0.1796	15.4701	0.1573	100.552	83.5454														Cima4b_ol59	40.2188
Cima1_ol63	40.2134	0.0299	39.766	0.2187	0.0162	0.3084	18.7612	0.1496	99.4633	79.2568														Cima3_ol127	43.7968	0.0311	40.3731	0.2375	0.0266	0.2063	16.1634	0.1528	100.988	82.8478														Cima4b_ol59	41.4484
Cima1_ol64	42.2314	0.032	40.3191	0.2115	0.0086	0.2318	16.1921	0.1602	99.3866	82.2986														Cima3_ol127	40.1324	0.0131	39.4095	0.2561	0.0078	0.3345	20.1194	0.1097	100.382	78.0498														Cima4b_ol59	41.8765
Cima1_ol64	42.4165	0.0403	40.1165	0.1972	0.0041	0.2285	16.264	0.1591	99.4262	82.2978														Cima3_ol129	42.3179	0.0248	39.8805	0.2641	0.0206	0.2357	17.6969	0.1255	100.566	80.9981														Cima4b_ol59	42.4547
Cima1_ol64	42.3042	0.0507	40.2819	0.21	0.0128	0.1978	16.2574	0.1734	99.4881	82.2649														Cima3_ol129	41.7128	0.0352	39.8621	0.2572	0.0133	0.251	18.2956	0.1241	100.551	80.2533														Cima4b_ol59	42.9408
Cima1_ol64	42.6312	0.0344	40.3639	0.2154	-0.0048	0.2293	16.4116	0.1459	100.027	82.2396														Cima3_ol129	39.7828	0.0279	39.3672	0.2555	0.0178	0.3139	20.682	0.1036	100.551	77.4209														Cima4b_ol59	42.3852
Cima1_ol64	42.224	0.0348	40.1797	0.2127	0.0178	0.2347	16.2553	0.1855	99.3445	82.2391														Cima3_ol129	42.4692	0.0154	40.1235	0.3027	0.0086	0.2519	17.3	0.116	100.587	81.3988														Cima4b_ol59	40.4846
Cima1_ol64	42.1688	0.0382	40.0885	0.2083	0.0058	0.2098	16.3532	0.1568	99.2294	82.132														Cima3_ol129	42.8369	0.0302	40.0824	0.2417	0.0135	0.2174	16.9821	0.1253	100.529	81.8066														Cima4b_ol59	36.9573
Cima1_ol64	42.1164	0.0494	40.2135	0.2028	0.0014	0.2457	16.5953	0.1452	99.5697	81.8972														Cima3_ol129	41.4111	0.0269	39.7197	0.2557	0.0211	0.2958	18.1295	0.1181	99.978	80.2828														Cima4b_ol60	34.9364
Cima1_ol64	40.8235	0.0316	39.7924	0.2189	0.0241	0.2719	17.9696	0.1717	99.3036	80.1969														Cima3_ol130	45.6291	0.0476	40.8824	0.2294	0.0354	0.1757	13.2752	0.214	100.489	85.969														Cima4b_ol60	37.9605
Cima1_ol64	35.7828	0.0372	38.7511	0.3229	0.0003	0.5279	23.6193	0.0604	99.1021	72.9772														Cima3_ol130	46.4927	0.041	40.9959	0.2289	0.0503	0.1791	12.4727	0.234	100.695	86.9189														Cima4b_ol60	38.911
Cima1_ol65	42.435	0.0525	40.4383	0.2077	0.0116	0.2095	16.1052	0.1629	99.6226	82.4466														Cima3_ol130	46.3536	0.0412	40.9428	0.2266	0.0443	0.1626	12.6435	0.2434	100.658	86.729														Cima4b_ol60	41.3843
Cima1_ol65	42.3566	0.0405	40.1649	0.2174	0.0056	0.2013	16.0997	0.164	99.2499	82.4247														Cima3_ol130	46.3752	0.1446	41.0061	0.2361	0.0561	0.1885	12.2101	0.2484	100.465	87.1308														Cima4b_ol60	42.1812
Cima1_ol65	42.4348	0.0413	40.4641	0.2147	0.0146	0.257	16.242	0.1774	99.8459	82.3237														Cima3_ol130	46.1806	0.0855	41.0372	0.2365	0.0415	0.1592	12.4424	0.2407	100.424	86.8701														Cima4b_ol61	37.1476
Cima1_ol65	42.4415	0.0465	40.4284	0.2107	0.0077	0.2303	16.2758	0.1592	99.8003	82.2958														Cima3_ol130	45.7732	0.0547	41.1644	0.2279	0.0379	0.1855	12.9322	0.2133	100.589	86.319														Cima4b_ol61	40.8555
Cima1_ol65	41.9042	0.0342	40.3939	0.2086	0.0188	0.2391	16.7809	0.1871	99.7667	81.656														Cima3_ol132	42.9138	0.0332	40.1909	0.2437	0.0229	0.2338	16.7809	0.128	100.547	82.0097														Cima4b_ol61	44.9092
Cima1_ol65	41.6665	0.052	39.9233	0.2068	0.0084	0.2152	16.9507	0.1528	99.1758	81.4187														Cima3_ol132	43.0394	0.041	40.0981	0.2521	0.0285	0.2437	16.7083	0.1359	100.547	82.1166														Cima4b_ol61	40.8086
Cima1_ol65	41.5233	0.0418	40.0302	0.2068	0.0149	0.2239	16.9842	0.1657	99.1908	81.3368														Cima3_ol132	43.1404	0.025	40.1825	0.2494	0.0196	0.2292	16.5463	0.1297	100.522	82.2936														Cima4b_ol62	40.5067
Cima1_ol65	40.3882	0.034	39.7408	0.2212	0.016	0.2655	18.4445	0.1604	99.2707	79.6056														Cima3_ol132	43.0253	0.0501	40.1786	0.2465	0.018	0.2081	16.6855	0.1269	100.539	82.1318														Cima4b_ol62	41.3356
Cima1_ol65	40.1326	0.0353	39.9251	0.2216	0.0102	0.2407	18.8471	0.1468	99.5594	79.1485														Cima3_ol132	42.9733	0.0449	40.2467	0.2578	0.0137	0.2374	16.5893	0.1249	100.488	82.1989														Cima4b_ol62	41.679
Cima1_ol66	37.9762	0.0746	39.0254	0.2575	0.0114	0.4175	21.2377	0.1412	99.1415	76.1195														Cima3_ol132	41.3942	0.053	39.8154	0.3145	0.0234	0.2664	18.973	0.1191	100.959	79.5465														Cima4b_ol62	41.7856
Cima1_ol66	36.4215	0.0337	38.9343	0.3397	0.0063	0.455	22.8044	0.0804	99.0753	74.0058														Cima3_ol132	42.5399	0.0481	39.7711	0.2617	0.0171	0.2548	17.6793	0.1301	100.702	81.0936														Cima4b_ol62	41.8373
Cima1_ol67	43.6586	0.0414	40.5383	0.2211	0.0312	0.2031	14.723	0.241	99.6577	84.0914														Cima3_ol137	38.6083	0.0215	38.998	0.2802	0.0047	0.3516	21.7267	0.0869	100.078	76.0055														Cima4b_ol62	41.8713
Cima1_ol67	43.547	0.0532	40.5146	0.2201	0.0286	0.1948	14.7814	0.2275	99.5671	84.0041														Cima3_ol137	41.3396	0.0268	39.7975	0.2375	0.0116	0.2722	18.6409	0.1271	100.453	79.8111														Cima4b_ol62	41.1831
Cima1_ol67	43.4509	0.0342	40.6226	0.2175	0.0323	0.2034	14.9937	0.225	99.7796	83.7816														Cima3_ol137	42.2339	0.0306	39.9587	0.2503	0.0154	0.2481	17.3175	0.1331	100.188	81.2991														Cima4b_ol62	38.0108
Cima1_ol67	43.1186	0.0531	40.6748	0.2196	0.0274	0.2057	15.0656	0.2227	99.5875	83.6115														Cima3_ol137	43.5439	0.0358	40.3572	0.2564	0.0261	0.2379	16.1022	0.158	100.717	82.8194														Cima4b_ol63	36.4586
Cima1_ol67	43.3699	0.0503	40.531	0.2169	0.0263	0.1893	15.2823	0.2248	99.8907	83.4953														Cima3_ol137	43.9639	0.0261	40.4234	0.2484	0.0298	0.222	15.3806	0.161	100.455	83.5942														Cima4b_ol64	40.2032
Cima1_ol67	42.7313	0.0397	40.5134	0.2247	0.0119	0.2092	15.7763	0.1906	99.697	82.8422														Cima3_ol137	43.9817	0.0457	40.3502	0.243	0.0232	0.1975	15.719	0.1648	100.725	83.2989														Cima4b_ol64	41.9423
Cima1_ol67	42.7335	0.0397	40.3722	0.2215	0.0223	0.2291	16.0627	0.1892	99.8701	82.5857														Cima3_ol137	41.2081	0.0363	39.7129	0.2534	0.0266	0.3171	18.6962	0.1214	100.372	79.7118														Cima4b_ol64	41.7988
Cima1_ol67	41.6825	0.0408	40.1805	0.2179	0.0157	0.2459	17.3296	0.161	99.8738	81.0878														Cima3_ol140	42.9054	0.0409	39.8315	0.2423	0.0205	0.2566	16.7959	0.1317	100.225	81.9939														Cima4b_ol64	41.3234
Cima1_ol67	40.3354	0.0459	39.9593	0.2209	0.021	0.2869	18.5743	0.1469	99.5906	79.4703														Cima3_ol140	43.9278	0.0393	40.3178	0.2422	0.0346	0.2194	15.5852	0.1688	100.535	83.4005														Cima4b_ol64	41.953
Cima1_ol67	37.4323	0.0278	39.245	0.2984	0.0173	0.4749	22.1101	0.0869	99.6928	75.1115														Cima3_ol140	44.5786	0.0337	40.4093	0.2338	0.0275	0.1821	14.8605	0.1878	100.513	84.2457														Cima4b_ol64	42.1643
Cima1_ol68	44.5637	0.0399	40.7596	0.2353	0.038	0.1952	12.9233	0.2887	99.0438	86.008														Cima3_ol140	44.4737	0.0374	40.5074	0.2455	0.0336	0.1942	14.6795	0.1995	100.371	84.3764														Cima4b_ol65	47.9141
Cima1_ol68	44.8137	0.0507	40.4154	0.2381	0.0358	0.1836	13.0646	0.3037	99.1057	85.9442														Cima3_ol140	43.9766	0.0412	40.2191	0.2481	0.0301	0.2257	15.5218	0.1766	100.439	83.4723														Cima4b_ol65	47.9153
Cima1_ol68	44.4273	0.0365	40.3795	0.2367	0.0333	0.2151	13.5357	0.2874	99.1514	85.4033														Cima3_ol140	43.1463	0.0291	40.1251	0.2409	0.0355	0.2254	16.4848	0.1523	100.439	82.3496														Cima4b_ol65	48.0605
Cima1_ol68	44.07	0.0473	40.4162	0.2393	0.0262	0.1837	13.7937	0.2611	99.0374	85.0641														Cima3_ol140	42.4072	0.0342	39.9378	0.2476	0.024	0.2594	17.5634	0.1329	100.606	81.1465														Cima4b_ol66	40.5066
Cima1_ol69	42.2741	0.0388	40.1347	0.2165	0.013	0.2048	15.9764	0.1852	99.0435	82.5076														Cima3_ol140	40.8541	0.0326	39.4501	0.2698	0.0281	0.2902	19.1628	0.1003	100.188	79.1684														Cima4b_ol66	40.5632
Cima1_ol69	42.1081	0.0428	40.1468	0.2191	0.011	0.2134	16.0818	0.1857	99.0087	82.3555														Cima3_ol142	44.3846	0.0274	40.5381	0.2299	0.0283	0.2399	14.8481	0.1846	100.481	84.1988														Cima4b_ol66	37.4561
Cima1_ol69	41.1514	0.0366	40.0082	0.21	0.0123	0.2905	17.2086	0.1737	99.0914	80.9985														Cima3_ol142	46.3118	0.044	40.9943	0.2221	0.0443	0.1729	12.8295	0.2448	100.864	86.5497														Cima4b_ol68	42.1305
Cima1_ol69	40.5184	0.0318	39.9837	0.2162	0.0156	0.2787	18.2395	0.1615	99.4452	79.8386														Cima3_ol142	46.3814	0.0649	40.9168	0.221	0.0453	0.1912	12.363	0.2553	100.439	86.9922														Cima4b_ol68	42.3456
Cima1_ol69	39.8778	0.0302	39.9511	0.2202	0.0066	0.2857	19.0566	0.14	99.568	78.8594														Cima3_ol142	46.6529	0.041	41.0585	0.2194	0.0424	0.1716	12.1631	0.2513	100.6	87.2403														Cima4b_ol70	43.5385
Cima1_ol69	38.1287	0.5633	40.3193	0.2862	0.0091	0.4517	20.117	0.1436	100.019	77.1617														Cima3_ol142	46.8245	0.0418	40.9841	0.2283	0.0501	0.1613	12.1788	0.2546	100.724	87.267														Cima4b_ol70	42.4273
Cima1_ol70	42.1707	0.0411	40.1497	0.2164	0.0214	0.2355	16.3345	0.1801	99.3493	82.1496														Cima3_ol142	46.7321	0.039	41.1022	0.2299	0.0397	0.1716	12.3788	0.2541	100.948	87.0628														Cima4b_ol70	40.975
Cima1_ol70	41.9442	0.1853	40.2326	0.2379	0.0251	0.2406	16.4236	0.1651	99.4543	81.9901														Cima3_ol142	45.6534	0.0369	40.7064	0.3011	0.0223	0.1907	13.2682	0.2158	100.395	85.9815														Cima4b_ol70	41.2419
Cima1_ol70	41.8969	0.0271	40.0453	0.2125	0.0228	0.2442	16.7227	0.1807	99.3522	81.7054														Cima3_ol142	44.8658	0.0355	40.7737	0.2295	0.0167	0.1846	14.293	0.191	100.59	84.8382														Cima4b_ol70	39
Cima1_ol70	41.3246	1.7764	39.2719	0.2541	0.1283	0.2201	16.5512	0.152	99.6786	81.6537														Cima3_ol142	38.5006	0.0153	41.2851	0.2376	0.0037	0.3011	19.4074	0.0997	99.8504	77.9557														Cima4b_ol72	38.7484
Cima1_ol70	41.2112	0.0251	39.9745	0.2157	0.0137	0.2577	17.4948	0.1709	99.3634	80.7658														Cima3_ol143	45.838	0.04	40.7126	0.2286	0.0356	0.1786	12.9913	0.2259	100.251	86.2817														Cima4b_ol72	42.4595
Cima1_ol70	40.9582	0.0322	40.0028	0.2783	0.0166	0.2956	17.8894	0.1616	99.6345	80.3198														Cima3_ol143	46.5626	0.0388	40.8789	0.2375	0.0438	0.1628	12.2363	0.2563	100.417	87.1518														Cima4b_ol72	42.5456
Cima1_ol70	39.9956	0.0109	39.6176	0.2452	0.0111	0.2857	18.8163	0.1302	99.1125	79.1191														Cima3_ol143	46.5731	0.0353	40.9181	0.2561	0.0444	0.1756	12.1944	0.258	100.455	87.1927														Cima4b_ol72	42.4969
Cima1_ol70	39.4428	0.0292	39.6629	0.2172	0.0211	0.3174	19.4794	0.141	99.311	78.3054														Cima3_ol143	46.4309	0.0371	40.8263	0.2493	0.0464	0.1723	12.309	0.2423	100.314	87.0535														Cima4b_ol72	40.9059
Cima1_ol71	41.5619	0.0305	40.0491	0.2036	0.0162	0.2148	16.9671	0.1799	99.2233	81.3659														Cima3_ol143	46.5218	0.0521	40.8769	0.2431	0.0553	0.1887	12.0446	0.254	100.237	87.3179														Cima4b_ol72	41.896
Cima1_ol71	41.4644	0.03	40.0305	0.2014	0.0162	0.238	17.1885	0.1764	99.3454	81.1329														Cima3_ol143	46.2051	0.0454	40.9689	0.2341	0.0417	0.174	12.4515	0.2448	100.366	86.8678														Cima4b_ol72	42.4586
Cima1_ol71	41.1896	0.0405	40.1634	0.2136	0.0145	0.2563	17.1961	0.1644	99.2384	81.0241														Cima3_ol143	44.5757	0.0372	40.4855	0.2365	0.0323	0.1789	14.638	0.1847	100.369	84.4439														Cima4b_ol73	36.5693
Cima1_ol71	41.1203	0.0193	40.1768	0.2084	0.0139	0.2647	17.387	0.1732	99.3636	80.8275														Cima3_ol144	42.6827	0.0427	39.9461	0.2425	0.0222	0.2446	16.2401	0.1452	99.5661	82.41														Cima4b_ol73	41.4299
Cima1_ol71	40.9063	0.0354	39.9661	0.2061	0.0151	0.2462	17.7552	0.1743	99.3048	80.4187														Cima3_ol144	44.4722	0.0378	40.3771	0.2256	0.0299	0.192	14.8794	0.1931	100.407	84.1968														Cima4b_ol73	39.7048
Cima1_ol71	40.6382	0.03	39.9133	0.2186	0.0132	0.2522	18.0642	0.1637	99.2934	80.0406														Cima3_ol144	45.3838	0.0578	40.6117	0.2351	0.0414	0.2005	13.6023	0.2057	100.338	85.6066														Cima4b_ol73	41.6278
Cima1_ol71	40.4891	0.031	40.0833	0.2198	0.0181	0.2363	18.4006	0.1501	99.6283	79.685														Cima3_ol144	45.4802	0.0395	40.6054	0.2315	0.0475	0.1614	13.4096	0.2142	100.189	85.8072														Cima4b_ol73	42.3986
Cima1_ol71	40.0863	0.0221	39.9948	0.2266	0.0086	0.3013	18.7668	0.1419	99.5483	79.1997														Cima3_ol144	45.1919	0.0344	40.589	0.2329	0.0388	0.1938	13.8415	0.2165	100.339	85.3375														Cima4b_ol73	41.0033
Cima1_ol73	41.1199	0.0301	39.656	0.2121	0.0159	0.258	17.753	0.1704	99.2153	80.5025														Cima3_ol144	43.8752	0.0399	40.2179	0.2417	0.0242	0.2437	15.7067	0.167	100.516	83.2761														Cima4b_ol75	41.1433
Cima1_ol73	40.5668	0.0349	39.6163	0.22	0.0136	0.2826	18.1282	0.1551	99.0177	79.956														Cima3_ol144	38.0186	0.0203	38.9948	0.2789	0.0061	0.3674	22.5438	0.0856	100.316	75.0388														Cima4b_ol75	41.9126
Cima1_ol73	33.948	1.8051	41.354	0.3966	-0.0023	0.4958	22.8509	0.084	100.932	72.5897														Cima3_ol148	44.1161	0.0316	40.4845	0.2488	0.0224	0.1803	15.5577	0.172	100.813	83.4841														Cima4b_ol75	42.2644
Cima1_ol74	42.2325	0.044	40.1699	0.2169	0.0179	0.1984	16.5191	0.1776	99.5764	82.0059														Cima3_ol148	45.35	0.0432	40.7428	0.235	0.0465	0.1923	14.0985	0.2038	100.912	85.15														Cima4b_ol75	38.1649
Cima1_ol74	42.0475	0.0445	40.299	0.2179	0.0153	0.246	16.5697	0.1738	99.6137	81.8954														Cima3_ol148	45.6232	0.0464	40.8436	0.2314	0.0494	0.1837	13.759	0.2186	100.955	85.5298														Cima4b_ol78	40.0332
Cima1_ol74	41.8538	0.0462	40.2093	0.2124	0.0119	0.2615	16.8919	0.1593	99.6463	81.5388														Cima3_ol148	44.5412	0.0419	40.5541	0.2366	0.0252	0.1813	14.861	0.1892	100.63	84.2338														Cima4b_ol78	43.1656
Cima1_ol74	41.9053	0.0283	40.0717	0.2009	0.017	0.2491	17.0977	0.1726	99.7426	81.3745														Cima3_ol148	42.7539	0.0306	40.6357	0.273	0.0134	0.2417	16.5235	0.1691	100.641	82.1821														Cima4b_ol78	43.1587
Cima1_ol74	41.6062	0.0423	40.049	0.2173	0.0101	0.2331	17.2992	0.1601	99.6172	81.0868														Cima3_ol148	44.0494	0.0355	40.5294	0.2361	0.0248	0.2139	15.7346	0.1763	101	83.3066														Cima4b_ol78	42.8644
Cima1_ol74	41.3916	0.0291	39.8992	0.2028	0.0178	0.2543	17.6062	0.1624	99.5634	80.735														Cima3_ol148	43.9105	0.0378	40.4292	0.2343	0.023	0.2267	15.6005	0.1827	100.645	83.3817														Cima4b_ol78	43.1901
Cima1_ol74	40.5199	0.0323	39.8384	0.2066	0.0078	0.2629	18.4772	0.1466	99.4916	79.6299														Cima3_ol150	44.1075	0.0412	40.5139	0.2587	0.0196	0.2043	15.3367	0.146	100.628	83.6777														Cima4b_ol78	43.1952
Cima1_ol74	40.1731	0.0226	39.7633	0.2119	0.0146	0.296	18.8334	0.1431	99.4579	79.177														Cima3_ol150	44.1021	0.0302	40.4215	0.2624	0.0384	0.2294	15.5812	0.1506	100.816	83.459														Cima4b_ol81	42.1727
Cima1_ol74	39.6293	0.0225	39.5329	0.2456	0.0102	0.3045	19.3783	0.1196	99.2429	78.4735														Cima3_ol150	43.8468	0.0332	40.3026	0.2435	0.0263	0.2283	15.7193	0.1589	100.559	83.256														Cima4b_ol81	42.1021
Cima1_ol75	42.3202	0.0352	40.2718	0.1964	0.0282	0.2296	16.179	0.1926	99.453	82.3408														Cima3_ol150	43.5702	0.0397	40.359	0.2468	0.0215	0.2246	15.9364	0.1421	100.54	82.9747
Cima1_ol75	42.2687	0.0171	40.3121	0.2105	0.0193	0.2364	16.4109	0.1877	99.6627	82.115														Cima3_ol150	43.3361	0.0241	40.366	0.2481	0.0164	0.1912	16.3289	0.1423	100.653	82.5506
Cima1_ol75	42.5568	0.0256	40.3418	0.2123	0.0178	0.2002	16.5234	0.1942	100.072	82.1144														Cima3_ol150	41.939	0.0258	40.0073	0.2452	0.0082	0.2184	17.9991	0.1286	100.572	80.5957
Cima1_ol75	42.2204	0.0402	40.3093	0.2104	0.0377	0.2014	16.3978	0.1952	99.6124	82.1101														Cima3_ol150	43.082	0.0289	40.262	0.243	0.032	0.2024	16.5265	0.1392	100.516	82.2911
Cima1_ol75	42.409	0.0307	40.3953	0.2077	0.0318	0.2449	16.4754	0.1948	99.9896	82.1061														Cima3_ol150	42.6546	0.0287	40.2831	0.2386	0.0181	0.2471	17.2946	0.1336	100.898	81.4694
Cima1_ol75	42.349	0.034	40.2722	0.2035	0.0242	0.246	16.487	0.1844	99.8003	82.0749														Cima3_ol150	40.5711	0.0203	39.6778	0.2339	0.0121	0.2988	19.7567	0.1201	100.691	78.5436
Cima1_ol75	41.5805	0.0487	40.0208	0.2104	0.0186	0.2376	16.8693	0.1792	99.1653	81.4604														Cima3_ol151	40.6325	0.0318	39.6989	0.2699	0.0176	0.3276	19.5437	0.1112	100.633	78.7509
Cima1_ol75	41.701	0.0344	40.2568	0.215	0.016	0.2633	17.0327	0.1787	99.6977	81.3582														Cima3_ol151	42.377	0.0232	40.2217	0.2369	0.0139	0.2341	17.5974	0.1338	100.838	81.1061
Cima1_ol75	41.5093	0.0302	40.0445	0.209	0.0238	0.2456	17.095	0.1799	99.3375	81.2327														Cima3_ol151	43.5552	0.0278	40.3232	0.2348	0.0289	0.2359	16.0644	0.1533	100.623	82.8563
Cima1_ol75	40.77	0.036	39.9064	0.2144	0.0119	0.2735	18.4623	0.148	99.8224	79.7426														Cima3_ol151	44.3847	0.0304	40.5091	0.237	0.0286	0.202	14.8565	0.1746	100.423	84.1911
Cima1_ol76	45.0014	0.0551	40.8018	0.2553	0.0552	0.1874	12.4925	0.2771	99.1258	86.5253														Cima3_ol151	44.9924	0.0387	40.8378	0.2371	0.0428	0.2196	14.3666	0.1907	100.926	84.8084
Cima1_ol76	45.3363	0.0329	41.0213	0.2399	0.0314	0.146	12.7044	0.2912	99.8035	86.4154														Cima3_ol151	45.4234	0.0485	40.7141	0.2354	0.0395	0.2129	13.7775	0.2079	100.659	85.4588
Cima1_ol76	45.1327	0.1381	40.6827	0.2535	0.0704	0.187	12.7439	0.2682	99.4766	86.3258														Cima3_ol151	45.9894	0.0276	40.9824	0.23	0.0225	0.1606	13.16	0.2269	100.799	86.1679
Cima1_ol76	45.5861	0.0276	41.1278	0.2424	0.0349	0.1704	12.8831	0.2939	100.366	86.3156														Cima3_ol151	46.0479	0.0475	40.9792	0.2351	0.0262	0.1695	12.9607	0.2291	100.695	86.3636
Cima1_ol76	44.948	0.0496	40.9924	0.2506	0.0281	0.1743	12.8035	0.2724	99.5189	86.2219														Cima3_ol151	45.938	0.0464	41.0287	0.2294	0.0496	0.193	13.0912	0.2168	100.793	86.2169
Cima1_ol76	44.7872	0.04	40.786	0.2548	0.0442	0.1657	12.8866	0.2846	99.2491	86.1022														Cima3_ol151	44.7805	0.0273	40.6988	0.2337	0.0283	0.2313	14.5361	0.1865	100.722	84.5951
Cima1_ol76	44.4566	0.104	40.7172	0.3511	0.0336	0.1855	13.2115	0.2809	99.3403	85.7111														Cima3_ol152	44.1834	0.037	40.4798	0.25	0.0425	0.2178	15.5454	0.1696	100.925	83.5161
Cima1_ol76	44.6643	0.0447	40.8054	0.2476	0.0261	0.1872	13.3784	0.2731	99.6268	85.6142														Cima3_ol152	44.3318	0.047	40.6043	0.2647	0.0138	0.2125	15.0209	0.195	100.69	84.0281
Cima1_ol76	37.2291	0.0353	39.5349	0.3641	0.0129	0.4352	21.9344	0.103	99.6488	75.1588														Cima3_ol152	43.4131	0.0622	40.3466	0.2925	-0.0013	0.2023	16.0926	0.1668	100.575	82.7849
Cima1_ol77	44.7976	0.0618	40.5214	0.2336	0.045	0.1741	13.4372	0.2887	99.5594	85.5968														Cima3_ol152	43.2401	0.0466	40.2848	0.2974	0.0037	0.23	16.34	0.1483	100.591	82.5089
Cima1_ol77	43.941	0.0596	40.3961	0.2308	0.042	0.2087	14.2218	0.2604	99.3604	84.6334														Cima3_ol152	43.6572	0.0496	40.3567	0.2861	0.0013	0.2303	16.0515	0.1597	100.792	82.9011
Cima1_ol77	43.3865	0.0465	40.2892	0.2086	0.0268	0.1962	15.1847	0.2174	99.5558	83.5885														Cima3_ol152	43.8317	0.0419	40.6433	0.2636	0.0052	0.218	15.7952	0.1616	100.961	83.1838
Cima1_ol77	41.9432	0.0415	39.9655	0.2078	0.02	0.2339	16.6339	0.175	99.2207	81.8012														Cima3_ol152	44.4114	0.0315	40.4197	0.2763	0.0217	0.1929	15.1359	0.1724	100.662	83.9496
Cima1_ol77	41.7181	0.0256	39.8305	0.2099	0.0212	0.2423	16.9403	0.1761	99.1639	81.4467														Cima3_ol152	43.8154	0.0258	40.3602	0.262	0.0318	0.2146	15.7205	0.1487	100.579	83.2448
Cima1_ol77	40.858	0.0237	39.7094	0.208	0.0281	0.2846	18.2026	0.1678	99.4823	80.0049														Cima3_ol153	44.9809	0.0346	40.6427	0.2348	0.0333	0.2049	14.0034	0.1985	100.333	85.1321
Cima1_ol77	38.8629	0.0205	39.4387	0.2488	0.0051	0.3275	20.303	0.1216	99.328	77.3353														Cima3_ol153	46.0808	0.0406	41.016	0.2302	0.0296	0.1667	12.8648	0.2325	100.661	86.4591
Cima1_ol77	38.5799	0.031	39.1552	0.2515	0.0123	0.3537	20.8585	0.1026	99.3447	76.7285														Cima3_ol153	46.4572	0.0421	40.9371	0.2314	0.0414	0.1724	12.5574	0.2462	100.685	86.8333
Cima1_ol78	44.8706	0.0426	40.6218	0.2335	0.0344	0.2079	12.7776	0.3054	99.0939	86.2257														Cima3_ol153	46.5204	0.0374	41.056	0.2339	0.0457	0.1748	12.3445	0.2513	100.664	87.0429
Cima1_ol78	44.8747	0.0468	40.6492	0.2292	0.0381	0.2009	12.8301	0.3082	99.1772	86.178														Cima3_ol153	46.5555	0.0431	41.0428	0.2273	0.0331	0.1838	12.2496	0.2534	100.589	87.138
Cima1_ol78	44.9923	0.0455	40.4966	0.2328	0.042	0.1761	12.8812	0.3037	99.1702	86.1617														Cima3_ol153	46.3501	0.0468	40.9893	0.2204	0.0338	0.1784	12.3884	0.245	100.452	86.9611
Cima1_ol78	44.1713	0.032	40.2871	0.2311	0.0281	0.1558	13.9205	0.2655	99.0915	84.9766														Cima3_ol153	46.0287	0.0413	40.9383	0.2316	0.0399	0.1662	13.1247	0.214	100.785	86.21
Cima1_ol78	41.6138	0.0429	39.8395	0.2078	0.0154	0.2528	17.1433	0.1744	99.2899	81.2281														Cima3_ol153	43.9066	0.0287	40.126	0.2559	0.0374	0.1889	14.9124	0.1749	99.6308	83.9961
Cima1_ol79	41.0203	0.0369	39.81	0.2165	0.0209	0.2944	17.7319	0.1507	99.2815	80.4832														Cima3_ol155	42.7408	0.0422	40.2142	0.2283	-0.0033	0.211	17.3838	0.117	100.934	81.4221
Cima1_ol79	40.8552	0.0288	39.9104	0.2171	0.013	0.259	17.693	0.1494	99.1259	80.4543														Cima3_ol155	42.1312	0.1137	39.8825	0.2523	0.0084	0.2	17.1561	0.1315	99.8758	81.4044
Cima1_ol79	40.9323	0.0339	39.8794	0.2282	0.009	0.258	17.7825	0.1508	99.2741	80.4046														Cima3_ol155	42.1636	0.0526	40.0288	0.2284	0.0028	0.2155	17.7506	0.1166	100.559	80.895
Cima1_ol79	40.8789	0.0604	39.8786	0.2199	0.0155	0.2702	17.9473	0.1428	99.4135	80.2382														Cima3_ol155	42.1418	0.0405	40.092	0.2298	0.0108	0.208	18.0937	0.1195	100.936	80.5894
Cima1_ol79	40.9843	0.032	39.8008	0.2151	0.0136	0.2655	18.0056	0.1516	99.4685	80.2273														Cima3_ol155	42.5558	0.0538	40.2036	0.2429	-0.0018	0.1677	17.0986	0.139	100.46	81.606
Cima1_ol79	40.8291	0.0349	39.9058	0.2307	0.0145	0.2367	17.9973	0.139	99.3881	80.1745														Cima3_ol156	39.8429	0.0178	39.1209	0.2889	0.0176	0.3291	20.8931	0.0954	100.606	77.2695
Cima1_ol79	40.821	0.0364	39.9352	0.216	0.0112	0.2384	18.2299	0.1569	99.6451	79.9663														Cima3_ol156	42.2674	0.0314	39.9152	0.2322	0.0121	0.2665	17.5526	0.1264	100.404	81.1056
Cima1_ol79	40.5477	0.0314	39.8122	0.2153	0.0154	0.2985	18.1925	0.1557	99.2687	79.8918														Cima3_ol156	43.602	0.0272	40.2511	0.2517	0.0258	0.238	15.8605	0.1397	100.396	83.0523
Cima1_ol79	39.7417	0.0766	39.7217	0.2845	0.0239	0.3101	19.2663	0.1482	99.573	78.6188														Cima3_ol156	44.2404	0.039	40.378	0.2524	0.0272	0.2257	14.9841	0.1495	100.296	84.0334
Cima1_ol80	43.9308	0.0715	40.5695	0.2192	0.0131	0.1695	14.3985	0.2122	99.5842	84.469														Cima3_ol156	44.5595	0.0343	40.3094	0.2412	0.0249	0.2116	14.5844	0.1774	100.143	84.4873
Cima1_ol80	44.0223	0.0515	40.4787	0.2134	0.0187	0.1803	14.472	0.2005	99.6374	84.4295														Cima3_ol156	44.7641	0.0388	40.5163	0.242	0.0199	0.2074	14.5975	0.181	100.567	84.5354
Cima1_ol80	44.0925	0.0453	40.5449	0.2193	0.0103	0.1711	14.6253	0.2115	99.9201	84.3117														Cima3_ol156	44.2883	0.0328	40.3669	0.2417	0.0293	0.2132	14.9371	0.1601	100.269	84.0899
Cima1_ol80	43.9412	0.0434	40.3702	0.2113	0.0174	0.2002	14.5838	0.2095	99.5771	84.3039														Cima3_ol156	43.4259	0.0308	40.1023	0.2298	0.026	0.2418	15.99	0.1432	100.19	82.8802
Cima1_ol80	43.9559	0.0421	40.478	0.2164	0.0089	0.2166	14.8209	0.2145	99.9533	84.0936														Cima3_ol156	41.7384	0.0259	39.6858	0.2488	0.0223	0.2623	18.0153	0.115	100.114	80.5067
Cima1_ol80	43.5242	0.0414	40.3564	0.2127	0.0148	0.195	14.958	0.1911	99.4935	83.8369														Cima3_ol157	42.5598	0.0264	40.0689	0.2395	0.0183	0.2512	17.5702	0.1288	100.863	81.1955
Cima1_ol80	42.7706	0.0508	40.0925	0.2017	0.0076	0.1905	15.948	0.1612	99.4229	82.701														Cima3_ol157	42.66	0.032	39.9666	0.2445	0.0131	0.2166	17.0982	0.1208	100.352	81.6431
Cima1_ol80	42.4285	0.0405	40.1021	0.2101	0.0124	0.2221	16.2746	0.171	99.4613	82.2923														Cima3_ol157	42.8726	0.0367	39.9217	0.2436	0.0192	0.2456	17.1301	0.1342	100.604	81.6895
Cima1_ol80	41.2828	0.0337	39.6165	0.2127	0.0203	0.2382	17.7871	0.1719	99.3632	80.5344														Cima3_ol157	42.8123	0.0126	40.0812	0.2511	0.0148	0.2122	17.0912	0.1394	100.615	81.7025
Cima1_ol80	40.0135	0.022	39.3269	0.2344	0.0152	0.29	19.3212	0.1296	99.3528	78.6855														Cima3_ol157	42.731	0.0463	39.9917	0.2506	0.0187	0.2584	17.0254	0.1389	100.461	81.7317
Cima1_ol81	42.5775	0.0421	40.0243	0.2161	0.0132	0.2293	16.3273	0.1826	99.6124	82.2964														Cima3_ol157	42.7196	0.0494	39.9657	0.2595	0.0167	0.2364	16.8994	0.1155	100.262	81.8386
Cima1_ol81	42.4373	0.0332	39.9605	0.2111	0.012	0.2057	16.2811	0.1906	99.3315	82.2893														Cima3_ol157	42.7718	0.0353	39.9497	0.2614	0.0164	0.245	16.9089	0.1166	100.305	81.8484
Cima1_ol81	42.1866	0.0468	39.9648	0.2164	0.0235	0.2543	16.475	0.1847	99.3521	82.029														Cima3_ol157	42.4243	0.025	39.9409	0.256	0.0121	0.2135	17.4352	0.1251	100.432	81.2646
Cima1_ol81	41.762	0.0235	39.77	0.2145	0.0191	0.2584	16.9604	0.1804	99.1885	81.4448														Cima3_ol157	40.367	0.0211	39.4462	0.2381	0.01	0.2442	19.76	0.1161	100.203	78.4556
Cima1_ol81	41.5381	0.0222	39.8515	0.207	0.0029	0.229	17.2132	0.1657	99.2298	81.138														Cima3_ol157	34.7032	0.0062	38.0357	0.3899	-0.0022	0.441	26.9712	0.0632	100.608	69.6383
Cima1_ol81	41.5731	0.0354	39.8304	0.2084	0.01	0.2605	17.3944	0.1748	99.4869	80.9901														Cima3_ol158	39.2414	0.0263	39.2094	0.2861	0.018	0.3404	21.2144	0.0973	100.433	76.7299
Cima1_ol81	40.5478	0.537	41.1629	0.2732	0.01	0.2522	17.138	0.1614	100.082	80.8337														Cima3_ol158	42.9236	0.0568	40.0338	0.2796	0.0186	0.2296	16.429	0.1482	100.119	82.3238
Cima1_ol81	41.2683	0.0422	39.864	0.2031	0.0161	0.2505	17.5607	0.1606	99.3655	80.7291														Cima3_ol158	42.2891	0.0187	39.8078	0.2125	0.012	0.2384	17.8319	0.1711	100.582	80.8702
Cima1_ol81	40.9797	0.0337	39.7058	0.2083	0.0187	0.2574	17.8279	0.1607	99.1921	80.3826														Cima3_ol158	41.1981	0.0355	39.529	0.2039	0.0125	0.2876	18.956	0.1927	100.415	79.4837
Cima1_ol81	40.0885	0.0239	39.5257	0.225	0.0224	0.2571	18.9178	0.1378	99.1982	79.0684														Cima3_ol158	40.6746	0.0274	39.4168	0.1973	0.0034	0.2884	19.7788	0.1819	100.569	78.5677
Cima1_ol82	42.4713	0.0381	40.2674	0.2224	0.0143	0.2198	16.0514	0.1582	99.4429	82.5072														Cima3_ol158	40.4448	0.0334	39.3539	0.2088	-0.0009	0.302	19.8723	0.1783	100.392	78.3922
Cima1_ol82	42.4834	0.0431	40.2627	0.2175	0.0274	0.2379	16.1602	0.182	99.6142	82.4136														Cima3_ol158	40.3946	0.0203	39.4142	0.188	0.0132	0.2721	19.6736	0.1855	100.162	78.541
Cima1_ol82	42.5518	0.0528	40.27	0.2203	0.0061	0.2046	16.2482	0.172	99.7259	82.3581														Cima3_ol158	41.2936	0.0199	39.604	0.2184	0.0144	0.2529	18.7484	0.1803	100.332	79.7003
Cima1_ol82	42.2973	0.0334	40.2503	0.2181	0.0057	0.2549	16.4682	0.1299	99.6579	82.0737														Cima3_ol158	42.2296	0.0335	39.9455	0.2403	0.0284	0.2227	17.6395	0.1596	100.499	81.0159
Cima1_ol82	42.35	0.0422	40.2012	0.2217	0.0085	0.2178	16.6645	0.1416	99.8475	81.9173														Cima3_ol158	42.8738	0.0401	40.1998	0.249	0.0117	0.2215	16.3436	0.1637	100.103	82.3827
Cima1_ol82	41.6227	0.0301	40.0608	0.2171	0.0094	0.2511	17.25	0.1796	99.6209	81.1365
Cima1_ol82	40.5221	0.0268	39.6816	0.2195	0.0058	0.2835	18.5987	0.1446	99.4827	79.5241
Cima1_ol82	39.6944	0.024	39.6355	0.2245	0.0029	0.3089	19.3028	0.1129	99.3057	78.567
Cima1_ol83	43.6455	0.0435	40.4643	0.2339	0.0295	0.1847	14.4725	0.2258	99.2997	84.3156
Cima1_ol83	43.4688	0.0597	40.2176	0.2195	0.0359	0.2127	14.8322	0.2296	99.2759	83.9338
Cima1_ol83	43.0549	0.0528	40.3582	0.2112	0.016	0.215	15.3088	0.2095	99.4264	83.3704
Cima1_ol83	42.5236	0.0418	40.2077	0.2087	0.017	0.2331	15.9391	0.191	99.3621	82.626
Cima1_ol83	41.6313	0.0374	39.9028	0.2016	0.0116	0.206	17.4534	0.1618	99.6059	80.9595
Cima1_ol83	41.0207	0.0243	39.78	0.2052	0.0155	0.2825	17.9962	0.1668	99.4911	80.2498
Cima1_ol83	40.4426	0.0255	39.6652	0.2085	0.0155	0.2989	18.4491	0.1513	99.2566	79.6235
Cima1_ol83	39.9101	0.0233	39.6394	0.2219	0.0062	0.2543	19.1337	0.1338	99.3226	78.8054
Cima1_ol84	43.2297	0.049	40.2389	0.2156	0.0277	0.1948	15.3986	0.2182	99.5724	83.3454
Cima1_ol84	43.1849	0.0461	40.2583	0.2044	0.0243	0.2153	15.635	0.1995	99.7678	83.1183
Cima1_ol84	42.7111	0.042	40.0756	0.2133	0.0162	0.2338	16.0669	0.1978	99.5566	82.5744
Cima1_ol84	42.3704	0.0479	40.0857	0.2093	0.0114	0.2531	16.5638	0.1773	99.7189	82.014
Cima1_ol84	42.0154	0.0414	40.1455	0.2057	0.0134	0.2407	17.2716	0.1833	100.117	81.2605
Cima1_ol84	41.6453	0.0319	39.816	0.2024	0.016	0.2003	17.4503	0.1682	99.5304	80.9674
Cima1_ol84	41.4103	0.0302	40.0897	0.2089	0.0103	0.2611	17.7685	0.1582	99.9372	80.599
Cima1_ol84	41.0693	0.0248	40.0701	0.2114	0.0074	0.2524	18.1668	0.162	99.9641	80.1187
Cima1_ol84	39.3017	0.0288	39.2461	0.2654	0.0131	0.3132	19.9039	0.113	99.1853	77.8752
Cima1_ol85	45.0252	0.0412	40.7448	0.2249	0.0467	0.1556	12.5721	0.3012	99.1116	86.4574
Cima1_ol85	45.0984	0.031	40.6703	0.2212	0.032	0.171	12.7119	0.3008	99.2367	86.3465
Cima1_ol85	45.0055	0.044	40.8139	0.2319	0.0281	0.1869	12.7027	0.3054	99.3184	86.3309
Cima1_ol85	45.2563	0.0479	40.8089	0.2361	0.0303	0.1648	12.8662	0.2717	99.6822	86.2451
Cima1_ol85	44.6558	0.0406	40.7049	0.2249	0.037	0.1606	13.1994	0.2843	99.3075	85.7768
Cima1_ol85	43.8455	0.041	40.5653	0.2263	0.0303	0.2142	14.4743	0.2325	99.6292	84.3745
Cima1_ol85	42.9806	0.0345	40.3909	0.2022	0.0205	0.2144	15.3591	0.2046	99.4068	83.3009
Cima1_ol85	42.1101	0.0486	40.0654	0.2068	0.0121	0.2133	16.3012	0.1925	99.1499	82.1583
Cima1_ol85	40.2851	0.0317	39.928	0.2149	0.0147	0.2814	18.4799	0.1395	99.3752	79.5331
Cima1_ol86	42.2591	0.0437	40.1326	0.2073	0.0223	0.2138	16.0689	0.1966	99.1442	82.419
Cima1_ol86	42.2086	0.0444	40.1223	0.212	0.019	0.2115	16.2533	0.1984	99.2694	82.2355
Cima1_ol86	42.1644	0.0329	40.089	0.2313	0.0158	0.251	16.3859	0.1526	99.323	82.1013
Cima1_ol86	42.122	0.0402	40.0264	0.1955	0.0079	0.2241	16.4787	0.1629	99.2576	82.0033
Cima1_ol86	41.4669	0.0427	39.8487	0.2062	0.0156	0.2511	17.0741	0.1724	99.0778	81.2357
Cima1_ol86	41.2338	0.0351	39.8298	0.2117	0.0211	0.2475	17.3136	0.1581	99.0508	80.9355
Cima1_ol86	41.2921	0.0205	39.8371	0.2131	0.0229	0.235	17.4351	0.1758	99.2316	80.8494
Cima1_ol86	41.1101	0.0319	40.0323	0.2281	0.0183	0.2454	17.5255	0.1755	99.367	80.7005
Cima1_ol86	40.1855	0.0271	39.8266	0.237	0.0088	0.258	18.6263	0.1515	99.3209	79.3637
Cima1_ol86	39.8313	0.031	39.6507	0.2388	0.0123	0.2967	18.9126	0.1326	99.1059	78.9662
Cima1_ol87	42.6218	0.0374	40.1342	0.2242	0.002	0.2224	16.0243	0.1195	99.3859	82.5825
Cima1_ol87	42.8106	0.0485	40.2057	0.2252	0.0107	0.203	16.1264	0.0987	99.7287	82.5546
Cima1_ol87	42.0921	0.046	40.0607	0.391	0.0192	0.2218	15.9806	0.2014	99.0128	82.4415
Cima1_ol87	42.6005	0.049	40.3138	0.2187	0.0029	0.1998	16.1958	0.0882	99.6686	82.4215
Cima1_ol87	42.4338	0.0401	39.9709	0.2104	0.0055	0.2215	16.1549	0.1599	99.197	82.4016
Cima1_ol87	42.2868	0.0365	40.0235	0.2081	0.0075	0.2261	16.1695	0.1582	99.1163	82.3379
Cima1_ol87	42.4758	0.0397	40.2782	0.2087	0.0013	0.1855	16.2673	0.1343	99.5909	82.3149
Cima1_ol87	41.7487	0.0439	40.1299	0.2222	0.0065	0.2212	16.9701	0.137	99.4795	81.4314
Cima1_ol87	41.6723	0.0307	39.7897	0.21	0.0091	0.2333	17.0732	0.1843	99.2026	81.3118
Cima1_ol87	40.3556	0.0193	39.6679	0.2167	0.0173	0.2919	18.9687	0.1366	99.6741	79.1336
Cima1_ol88	43.6393	0.0413	40.2065	0.2046	0.0182	0.2012	15.9759	0.1904	100.477	82.9619
Cima1_ol88	43.1281	0.2447	40.1699	0.2297	0.0168	0.2172	15.8453	0.1785	100.03	82.9116
Cima1_ol88	42.886	0.0451	40.3723	0.2103	0.0177	0.2251	15.7704	0.2065	99.7334	82.8987
Cima1_ol88	42.807	0.0417	40.2134	0.208	0.0245	0.1997	15.7722	0.1934	99.4599	82.8711
Cima1_ol88	42.6083	0.0502	40.4247	0.2137	0.0262	0.2329	15.7758	0.19	99.5218	82.8016
Cima1_ol88	42.7761	0.0444	40.316	0.2056	0.0212	0.2391	15.8884	0.1973	99.6881	82.7562
Cima1_ol88	42.8398	0.0508	40.4184	0.2037	0.0121	0.2076	15.9475	0.1889	99.8689	82.7245
Cima1_ol88	42.0592	0.0389	40.0996	0.2065	0.0201	0.2132	16.6916	0.1791	99.5081	81.7907
Cima1_ol88	40.3088	0.0304	40.1979	0.2196	0.0112	0.2918	19.084	0.1377	100.281	79.0143
Cima1_ol89	45.0057	0.0412	40.7191	0.235	0.0339	0.1934	12.7417	0.3061	99.2761	86.2946
Cima1_ol89	45.0421	0.0564	40.5556	0.2345	0.0387	0.1669	12.7917	0.3055	99.1914	86.2577
Cima1_ol89	44.9433	0.0382	40.6166	0.2293	0.0404	0.1839	12.8964	0.3062	99.2543	86.1348
Cima1_ol89	45.051	0.047	40.8627	0.224	0.0373	0.1832	12.9282	0.3138	99.6472	86.1338
Cima1_ol89	44.8501	0.0549	40.6936	0.2298	0.0343	0.1587	13.0755	0.2827	99.3796	85.944
Cima1_ol89	44.4822	0.0355	40.6261	0.242	0.0302	0.1688	13.3656	0.2422	99.1926	85.5754
Cima1_ol89	44.6169	0.0345	40.6358	0.2267	0.0304	0.2148	13.407	0.2948	99.4608	85.5745
Cima1_ol89	44.053	0.0517	40.6502	0.2465	0.0151	0.184	14.1374	0.244	99.582	84.7434
Cima1_ol89	42.161	0.0402	40.1683	0.2456	0.0419	0.2279	16.0829	0.2737	99.2414	82.3728
Cima1_ol90	44.4749	0.0435	40.4553	0.2338	0.0508	0.1852	13.4609	0.3019	99.2063	85.4855
Cima1_ol90	44.3248	0.0462	40.2978	0.2364	0.0385	0.2113	13.6056	0.2937	99.0544	85.3101
Cima1_ol90	44.1434	0.0472	40.2849	0.2263	0.0326	0.1805	13.9472	0.2802	99.1422	84.9443
Cima1_ol90	43.408	0.0509	40.2893	0.215	0.0333	0.1659	14.8784	0.2039	99.2446	83.8729
Cima1_ol90	42.392	0.0513	40.0669	0.2147	0.0166	0.2364	15.9633	0.1875	99.1289	82.5597
Cima1_ol90	42.0835	0.0489	40.0141	0.2071	0.017	0.1835	16.5443	0.1917	99.2901	81.9311
Cima1_ol90	41.4005	0.0312	39.6952	0.2055	0.0144	0.2396	17.3539	0.1554	99.0957	80.9619
Cima1_ol90	25.574	4.812	44.7228	0.83	-0.0076	0.6043	23.6445	0.0441	100.224	65.8475
Cima1_ol91	42.3042	0.0429	40.2912	0.2219	0.0151	0.2006	16.3034	0.1972	99.5764	82.2236
Cima1_ol91	43.1986	0.0522	40.1675	0.2225	0.017	0.2055	16.8572	0.1795	100.9	82.0405
Cima1_ol91	42.0586	0.037	40.2255	0.2652	0.0235	0.236	16.4191	0.1823	99.4472	82.0344
Cima1_ol91	42.1368	0.0434	40.2661	0.2196	0.0181	0.2298	16.7345	0.1811	99.8296	81.78
Cima1_ol91	42.0764	0.0537	40.1613	0.217	0.0065	0.2198	16.8601	0.1745	99.7693	81.6468
Cima1_ol91	41.8122	0.01	40.0409	0.2123	0.0223	0.2321	17.0519	0.1722	99.5538	81.3816
Cima1_ol91	41.0085	0.0371	39.893	0.2077	0.0113	0.2472	17.9964	0.1649	99.566	80.245
Cima1_ol91	38.9715	0.033	39.3639	0.2551	0.0095	0.322	20.163	0.1171	99.2352	77.505
Cima1_ol91	37.787	0.0253	39.376	0.2919	0.0234	0.4539	22.0913	0.1102	100.159	75.3033
Cima1_ol92	45.215	0.044	40.905	0.2304	0.0524	0.1675	12.8472	0.3042	99.7657	86.252
Cima1_ol92	45.1874	0.0463	40.8246	0.2395	0.0332	0.1574	12.876	0.2967	99.6609	86.2179
Cima1_ol92	45.1651	0.0544	40.8493	0.2334	0.0404	0.1778	12.8852	0.3016	99.7072	86.2036
Cima1_ol92	44.9773	0.0444	40.9626	0.238	0.0383	0.1904	12.9955	0.2796	99.7261	86.052
Cima1_ol92	44.8325	0.0435	40.811	0.2326	0.0397	0.1796	13.4681	0.29	99.897	85.578
Cima1_ol92	43.6573	0.0354	40.6481	0.2057	0.0313	0.1844	14.9146	0.2348	99.9116	83.9175
Cima1_ol92	40.5136	0.044	39.8364	0.2114	0.0119	0.2758	18.6175	0.1536	99.664	79.5044
Cima1_ol92	39.8722	0.0359	39.4942	0.2405	0.0194	0.3023	19.6379	0.1293	99.7316	78.3518
Cima1_ol92	37.9377	0.0433	39.1041	0.223	0.0033	0.418	21.952	0.1044	99.7857	75.4942
Cima1_ol93	43.4274	0.0386	40.4505	0.2141	0.0121	0.2065	14.8675	0.1829	99.3997	83.8887
Cima1_ol93	43.47	0.0495	40.4302	0.2181	0.0078	0.1983	15.1529	0.1868	99.7135	83.6435
Cima1_ol93	43.2948	0.0484	40.4923	0.2174	0.005	0.228	15.3443	0.1776	99.8078	83.4153
Cima1_ol93	42.9822	0.0477	40.4957	0.2004	0.0101	0.2159	15.5165	0.1882	99.6567	83.1592
Cima1_ol93	42.9481	0.0271	40.361	0.2051	0.0057	0.2114	15.7112	0.1829	99.6525	82.9727
Cima1_ol93	42.4902	0.0347	40.3628	0.2026	0.0235	0.1873	16.1189	0.1766	99.5968	82.4529
Cima1_ol93	42.4391	0.0446	40.2722	0.2153	0.006	0.2086	16.2169	0.1676	99.5702	82.3477
Cima1_ol93	41.9051	0.0415	40.1362	0.2033	0.0219	0.2451	16.9195	0.1757	99.6483	81.5328
Cima1_ol93	39.9351	0.0194	39.607	0.2148	0.0098	0.3044	19.3287	0.143	99.5621	78.6461
Cima1_ol93	38.2877	0.0229	39.5218	0.2425	0.0103	0.3874	21.1669	0.1067	99.7462	76.3282
Cima1_ol94	42.0958	0.0447	40.1466	0.2338	0.0115	0.233	16.4463	0.1703	99.382	82.0231
Cima1_ol94	42.1417	0.0398	40.4235	0.2183	0.0088	0.2137	16.7275	0.1178	99.8911	81.788
Cima1_ol94	42.0352	0.0253	40.1025	0.2074	-0.0029	0.2435	16.7224	0.1379	99.4713	81.7547
Cima1_ol94	41.8524	0.0423	40.2552	0.2121	0.0024	0.2072	16.7657	0.1486	99.4858	81.651
Cima1_ol94	41.9113	0.034	39.9679	0.218	0.0103	0.24	16.8678	0.1529	99.4021	81.581
Cima1_ol94	41.8201	0.0527	40.1448	0.2469	0.0063	0.2398	17.0029	0.1338	99.6473	81.4278
Cima1_ol94	41.7879	0.0445	39.9531	0.2111	0.0029	0.2361	17.0382	0.1454	99.4191	81.3848
Cima1_ol94	41.3682	0.0448	40.0215	0.2193	-0.0041	0.2359	17.4129	0.1486	99.4472	80.8976
Cima1_ol94	41.0548	0.0345	40.0357	0.2161	0.0145	0.2387	17.97	0.1648	99.7291	80.2861
Cima1_ol95	42.1228	0.0288	40.0184	0.2215	0.0175	0.2049	16.7421	0.1637	99.5198	81.7684
Cima1_ol95	41.8474	0.063	40.1131	0.2485	-0.0002	0.2157	16.7322	0.0679	99.2876	81.6792
Cima1_ol95	41.8346	0.0443	40.3131	0.2403	0.0169	0.2413	16.8533	0.1229	99.6666	81.5664
Cima1_ol95	41.7074	0.0449	40.0196	0.2511	0.0078	0.1974	16.8128	0.0741	99.115	81.5569
Cima1_ol95	41.6419	0.0471	39.9857	0.2146	0.0128	0.2253	17.0021	0.1772	99.3067	81.364
Cima1_ol95	41.4655	0.0348	39.8667	0.2068	0.0156	0.2564	17.2237	0.168	99.2376	81.1017
Cima1_ol95	41.3862	0.0334	39.7281	0.2176	0.0216	0.2703	17.5888	0.1571	99.4032	80.7483
Cima1_ol95	40.9758	0.0353	39.8693	0.209	0.0168	0.2481	17.8904	0.1613	99.406	80.3259
Cima1_ol95	39.3593	0.0286	39.3966	0.27	0.0125	0.3287	19.8514	0.1237	99.3708	77.946
Cima1_ol96	44.1086	0.0546	40.5541	0.2224	0.0327	0.1774	13.966	0.2635	99.3794	84.9167
Cima1_ol96	43.7245	0.0533	40.5726	0.2198	0.0352	0.1762	14.5777	0.2227	99.582	84.2437
Cima1_ol96	43.2841	0.0383	40.3802	0.2101	0.0281	0.2078	15.1303	0.2006	99.4795	83.6054
Cima1_ol96	42.9277	0.0364	40.3781	0.2037	0.0211	0.2393	15.7326	0.195	99.7338	82.9465
Cima1_ol96	42.6105	0.0446	40.1809	0.2011	0.0243	0.2185	16.1764	0.1841	99.6403	82.4423
Cima1_ol96	42.2129	0.0439	40.3003	0.1979	0.0176	0.2495	16.6727	0.1848	99.8796	81.8617
Cima1_ol96	41.6934	0.0452	40.0272	0.2051	0.0168	0.2148	16.9095	0.1746	99.2867	81.4653
Cima1_ol96	41.4498	0.0366	40.1059	0.211	0.0139	0.2651	17.5936	0.1748	99.8506	80.7682
Cima1_ol96	40.9022	0.0396	39.7609	0.1998	0.0186	0.2913	18.0467	0.1527	99.4118	80.1595
Cima1_ol96	40.4393	0.0391	39.9547	0.2226	0.0205	0.2865	18.385	0.1562	99.5038	79.6786
Cima1_ol97	42.1898	0.0398	40.2553	0.2128	0.0179	0.275	16.8044	0.1771	99.9719	81.7367
Cima1_ol97	42.1106	0.0337	40.2533	0.2076	0.0159	0.2335	17.0729	0.1735	100.101	81.4706
Cima1_ol97	42.0802	0.0233	40.3471	0.2195	0.0285	0.2554	17.0654	0.1753	100.195	81.4662
Cima1_ol97	41.8841	0.0389	40.244	0.2096	0.0103	0.24	17.5787	0.1779	100.383	80.9425
Cima1_ol97	41.4593	0.0361	40.2257	0.2151	0.0148	0.2527	17.8274	0.1729	100.204	80.5657
Cima1_ol97	41.0555	0.0167	39.9219	0.2173	0.0124	0.2754	18.3181	0.1534	99.9706	79.9808
Cima1_ol97	40.8379	0.0217	40.084	0.2118	0.0104	0.2819	18.2964	0.1673	99.9113	79.9148
Cima1_ol97	40.6923	0.0378	39.8963	0.226	0.0144	0.2797	18.2465	0.1644	99.5575	79.9012
Cima1_ol97	40.6938	0.0298	39.9059	0.2227	0.0148	0.3156	18.7204	0.1531	100.056	79.487
Cima1_ol97	38.9934	0.062	39.2997	1.4832	0.0066	0.3047	19.2411	0.1483	99.539	78.3198
Cima1_ol98	41.9203	0.0428	40.0685	0.2103	0.0208	0.2315	16.5076	0.186	99.1878	81.9065
Cima1_ol99	45.1803	0.047	40.9152	0.2347	0.0356	0.1895	12.7632	0.298	99.6634	86.3205
Cima1_ol99	45.0144	0.0426	40.9795	0.2372	0.049	0.1581	12.8125	0.3117	99.6049	86.2312
Cima1_ol99	44.8544	0.0463	41.1211	0.2306	0.0305	0.1656	12.9285	0.3107	99.6877	86.0812
Cima1_ol99	44.7517	0.0425	41.0758	0.2341	0.0439	0.1852	13.332	0.2897	99.9549	85.6808
Cima1_ol99	42.8811	0.0414	40.6023	0.2145	0.0162	0.1957	15.5194	0.2043	99.6749	83.1234
Cima1_ol99	42.47	0.032	40.2446	0.2264	0.0326	0.2439	15.9212	0.2507	99.4214	82.6242
Cima1_ol99	41.4332	0.0303	40.0368	0.2146	0.0131	0.2957	17.6185	0.1771	99.8194	80.7399
Cima1_ol99	40.8258	0.029	40.042	0.2205	0.0196	0.2866	18.3539	0.1593	99.9367	79.8594
Cima1_ol99	39.2259	-0.0002	39.5067	0.2519	0.0082	0.3473	20.1268	0.126	99.5925	77.6494
Cima1_ol100	41.8614	0.0308	40.1476	0.2182	0.0237	0.1904	16.652	0.181	99.305	81.7558
Cima1_ol100	41.9199	0.0415	40.1364	0.2318	0.014	0.2432	16.7171	0.1896	99.4934	81.7185
Cima1_ol100	41.6301	0.0545	39.7755	0.2096	0.0115	0.2338	17.1515	0.1694	99.236	81.2267
Cima1_ol100	41.2883	0.0344	39.8921	0.2129	0.0164	0.2342	17.5156	0.1712	99.3651	80.7766
Cima1_ol100	41.1944	0.0469	39.8738	0.204	0.0108	0.2454	17.5066	0.1786	99.2604	80.7492
Cima1_ol100	39.8075	0.0185	39.8025	0.2283	0.0221	0.3293	18.9787	0.1391	99.326	78.8982
[truncated: 64 more columns]

## Sheet: Table S4
Table S.4a. CLINOPYROXENE ANALYSES FOR FIVE CIMA HAWAIITES.																	Table S.4b. COMPOSITION OF THE MOST Mg-RICH CLINOPYROXENE PHENOCRYST.
oxide wt %	pheno vs micro	texture	SiO2	TiO2	Al2O3	Cr2O3	FeO	MnO	MgO	CaO	Na2O	NiO	sum	Mg#	Al VI		Oxide wt%	Cima-3	Cima-8	Cima-1	Cima-2	Cima-5
Cima1_cpx1	PHENO	SZ/OZ	45.972	2.8336	7.4425	0.0122	8.2817	0.1472	12.6199	21.6361	0.6199	0.0053	99.5705	73.092	0.0448148		Crystal	cpx 62	cpx 16	cpx 3	cpx 25	cpx 37
Cima1_cpx1	PHENO	SZ/OZ	44.9908	3.1813	7.5288	0.0363	8.1105	0.1436	12.5165	21.8415	0.6159	0.017	98.9822	73.3403	0.0247638		SiO2	49.0934	47.3205	50.6822	50.5274	52.383
Cima1_cpx1	PHENO	SZ/OZ	44.5994	3.3205	7.71	0.0348	8.138	0.15	12.5044	21.8636	0.6399	0.0066	98.9672	73.2551	0.0181582		TiO2	1.2334	1.624	0.7084	1.2353	0.5951
Cima1_cpx1	PHENO	SZ/OZ	45.0176	3.3533	7.6661	0.0265	8.1202	0.1521	12.3518	22.001	0.6041	0.0082	99.3008	73.057	0.027629		Al2O3	5.2989	7.5456	4.757	4.0472	1.2556
Cima1_cpx1	PHENO	SZ/OZ	42.5446	4.0634	9.3082	0.0567	8.6986	0.1493	11.5832	21.6857	0.6347	-0.0013	98.7231	70.3592	0.0251769		Cr2O3	0.5214	0.8363	0.3459	0.3689	0.4838
Cima1_cpx1	PHENO	SZ/OZ	43.2309	4	8.6858	0.0065	8.4644	0.1481	11.8569	21.8711	0.6718	-0.0033	98.9322	71.4045	0.0168534		FeO	6.0521	6.2759	7.1208	7.831	7.9154
Cima1_cpx2	PHENO	SZ/OZ	48.6589	1.8961	4.2816	0.0039	7.8453	0.2029	14.428	21.4456	0.4936	0.0138	99.2695	76.6262	0.00237148		MnO	0.1356	0.1215	0.1567	0.2124	0.2385
Cima1_cpx2	PHENO	SZ/OZ	48.0871	2.0581	4.7381	0.0026	8.0658	0.1831	14.0268	21.5054	0.5098	0.0144	99.1912	75.6098	0.00576196		MgO	16.168	14.7598	14.7679	16.7403	17.4996
Cima1_cpx2	PHENO	SZ/OZ	49.0592	1.6859	4.236	0.0204	7.3528	0.1833	14.8473	21.5127	0.5177	0.01	99.4252	78.2587	0.00572648		CaO	19.8595	20.495	20.8422	18.6002	19.0319
Cima1_cpx2	PHENO	SZ/OZ	48.9102	1.7313	4.1918	0.0167	7.6025	0.1658	14.6562	21.5921	0.4915	-0.0057	99.3524	77.4598	0.00267394		Na2O	0.6058	0.6327	0.9696	0.5056	0.4512
Cima1_cpx2	PHENO	SZ/OZ	48.3084	1.782	4.6192	0.0908	7.4416	0.1487	14.4907	21.5037	0.4779	0.0084	98.8714	77.6345	0.00846612		NiO	0.0294	0.0311	0.0289	0.0126	0.0469
Cima1_cpx2	PHENO	SZ/OZ	37.0862	0.0768	0.0512	0.0095	22.1522	0.3579	38.7624	0.4377	0.0028	0.0666	99.0032	75.7236	-0.700655		Total	98.9976	99.6423	100.38	100.081	99.901
Cima1_cpx2	PHENO	SZ/OZ	37.7104	0.7026	1.0187	0.014	19.816	0.3368	35.3463	4.5659	0.0475	0.0773	99.6355	76.0746	-0.635232		Mg#	82.6454	80.7409	78.7095	79.2128	79.7612
Cima1_cpx2	PHENO	SZ/OZ	45.3934	2.7796	7.1749	0.0078	8.2172	0.1599	12.5955	21.9832	0.6243	-0.0124	98.9233	73.2076	0.0237463
Cima1_cpx2	PHENO	SZ/OZ	44.8786	3.0989	7.4471	0.0099	8.0676	0.1507	12.5817	21.9802	0.6066	0.0165	98.8378	73.5451	0.0186929			Clinopyroxene 1thermobarometry (Putirka et al., 2008)
Cima1_cpx2	PHENO	SZ/OZ	43.5524	3.5692	8.3434	0.046	8.4736	0.1415	12.1188	21.8409	0.6129	0.0137	98.7124	71.8265	0.015854		1 Fe-Mg KD (cxp-liq)	0.27603	0.292001	0.301385	0.290455	0.266438
Cima1_cpx3	PHENO	verm	50.9997	0.4942	4.3591	0.269	7.3613	0.1703	14.7721	20.5228	0.9303	0.0163	99.8952	78.1525	0.0643173		1 Fe-Mg KD (cpx-liquid) calculated using the most Mg-rich cpx and the whole-rock composition. The accepted range of equilibrium values is 0.27 ± 0.03 (Putirka, 2008)
Cima1_cpx3	PHENO	verm	50.6198	0.5899	4.5972	0.4004	7.4971	0.182	14.6383	20.4694	0.9872	0.0192	100.001	77.6814	0.0596892
Cima1_cpx3	PHENO	verm	50.6189	0.6144	4.3742	0.4734	7.4006	0.1581	14.835	20.4906	0.9714	0.0384	99.975	78.1341	0.0497351
Cima1_cpx3	PHENO	verm	50.6822	0.7084	4.757	0.3459	7.1208	0.1567	14.7679	20.8422	0.9696	0.0289	100.38	78.7095	0.0589054
Cima1_cpx3	PHENO	verm	52.8945	0.4387	4.0855	0.1644	12.9703	0.2363	24.1692	5.0541	0.3396	0.0403	100.393	76.8611	0.0735182
Cima1_cpx4	PHENO	SZ/OZ	48.5629	1.8588	4.6442	0.1	7.2628	0.152	14.5047	21.9687	0.4701	0.0209	99.5451	78.0705	0.00564036
Cima1_cpx4	PHENO	SZ/OZ	45.371	3.1184	7.4412	0.0135	8.2926	0.1743	12.5266	21.7467	0.6509	-0.0054	99.3298	72.9199	0.028502
Cima1_cpx4	PHENO	SZ/OZ	45.0024	3.12	7.8528	0.115	7.9039	0.1398	12.4938	21.8877	0.6128	-0.0147	99.1134	73.8067	0.0353964
Cima1_cpx4	PHENO	SZ/OZ	43.8738	3.5425	8.3286	0.1135	8.2993	0.1247	12.0526	21.9507	0.6371	0.0134	98.936	72.1352	0.0227303
Cima1_cpx4	PHENO	SZ/OZ	46.9571	2.3884	6.2838	0.1337	7.6201	0.1481	13.5585	21.92	0.539	0.014	99.5628	76.0294	0.0232662
Cima1_cpx4	PHENO	SZ/OZ	44.8682	2.9204	7.5168	0.0067	8.7051	0.1407	12.199	21.6588	0.6504	0.0175	98.6835	71.4127	0.0285085
Cima1_cpx4	PHENO	SZ/OZ	45.5857	2.6667	7.1754	0.0628	8.0345	0.1354	12.8546	22.019	0.5839	0.0101	99.128	74.0396	0.0244159
Cima1_cpx4	PHENO	SZ/OZ	45.2924	2.771	7.2304	0.0233	8.5054	0.1608	12.5556	21.6734	0.5939	0.0053	98.8114	72.4628	0.0266244
Cima1_cpx5	PHENO	SZ/OZ	48.7877	1.8269	4.424	0.0511	7.4868	0.1536	14.6514	21.8372	0.474	0.0013	99.6939	77.7207	0.00137637
Cima1_cpx5	PHENO	SZ/OZ	48.9324	1.8604	4.3759	0.0515	7.593	0.1605	14.5619	21.7547	0.4905	0.0152	99.7959	77.3688	0.00410886
Cima1_cpx5	PHENO	SZ/OZ	48.5036	2.016	4.6116	0.0234	8.2268	0.1819	14.4369	21.2045	0.4783	0.0279	99.711	75.7764	0.00401029
Cima1_cpx5	PHENO	SZ/OZ	48.0173	2.0353	4.6354	0.0805	7.5206	0.1534	14.2587	21.7922	0.4723	0.0101	98.9758	77.1675	-0.000477188
Cima1_cpx5	PHENO	SZ/OZ	43.9692	3.4291	8.5182	0.1351	8.2296	0.1393	12.1541	21.6509	0.588	0.0268	98.8402	72.472	0.035615
Cima1_cpx5	PHENO	SZ/OZ	44.7375	3.2826	7.7649	0.0526	8.1484	0.1537	11.7227	22.1174	0.6623	0.0253	98.6674	71.9458	0.0379653
Cima1_cpx5	PHENO	SZ/OZ	44.1833	3.6441	8.3526	0.0176	8.535	0.1453	12.0457	21.702	0.6636	0.01	99.2993	71.5572	0.0292888
Cima1_cpx5	PHENO	SZ/OZ	45.2374	3.0565	7.7295	0.0962	8.0429	0.1385	12.5724	21.9087	0.6215	0.0124	99.416	73.5903	0.0326534
Cima1_cpx5	PHENO	SZ/OZ	48.4734	1.8299	4.7141	0.073	7.2251	0.153	14.0858	22.0849	0.7528	0.0111	99.4031	77.655	0.00655167
Cima1_cpx6	MICRO	verm	37.8354	0.0881	0.2685	0.0084	23.3453	0.3231	37.8897	0.5309	0.0182	0.1054	100.413	74.314	-0.67523
Cima1_cpx7	MICRO	verm	48.6015	1.0114	5.4678	0.367	8.3287	0.1994	13.5762	20.5769	0.8325	0.0169	98.9782	74.3965	0.0562694
Cima1_cpx7	MICRO	verm	49.1033	0.7797	5.1028	0.5161	8.1783	0.2121	13.7432	20.7089	0.8502	0.022	99.2166	74.9722	0.0526628
Cima1_cpx7	MICRO	verm	48.246	0.9795	5.7611	0.4463	8.2471	0.2061	13.2577	20.7969	0.8642	0.0319	98.8367	74.131	0.0597777
Cima1_cpx7	MICRO	verm	48.1483	1.4534	5.7981	0.3133	7.4742	0.1649	14.4668	20.4951	0.6574	0.0117	98.9834	77.5297	0.0463838
Cima1_cpx7	MICRO	verm	48.2564	2.0493	7.5574	0.2031	7.1521	0.1464	14.6551	18.0906	0.6953	0.0125	98.8182	78.5069	0.126923
Cima1_cpx7	MICRO	verm	48.8997	0.9343	5.3761	0.4091	8.1091	0.2054	13.6289	20.546	0.8747	0.0089	98.9923	74.9749	0.0613656
Cima1_cpx7	MICRO	verm	49.2707	0.9853	4.8104	0.3191	8.2433	0.2199	14.0453	20.6749	0.7686	0.0026	99.3401	75.2307	0.0436119
Cima1_cpx7	MICRO	verm	49.0439	1.1272	5.3345	0.0942	8.385	0.2063	13.7595	21.2203	0.7945	0.0178	99.9831	74.5234	0.0458655
Cima1_cpx7	MICRO	verm	48.1184	1.6982	5.6785	0.2766	7.4511	0.1788	14.0836	21.3842	0.6516	0.0177	99.5388	77.1133	0.0333602
Cima1_cpx8	PHENO	SZ/OZ	44.3277	3.48	8.1269	0.0449	8.2101	0.1551	12.1536	21.9811	0.6236	0.024	99.1269	72.5185	0.0264307
Cima1_cpx8	PHENO	SZ/OZ	44.1781	3.7301	8.6006	0.0415	8.4292	0.1476	11.9039	21.8219	0.6496	0.0129	99.5155	71.5701	0.036676
Cima1_cpx8	PHENO	SZ/OZ	45.7649	2.8658	7.2667	0.0057	8.515	0.1644	12.5895	21.5756	0.6608	0.0131	99.4215	72.4941	0.0333878
Cima1_cpx8	PHENO	SZ/OZ	45.5798	2.7869	7.2481	-0.0178	8.6094	0.1689	12.5937	21.6545	0.7023	-0.0017	99.3242	72.2804	0.0265194
Cima1_cpx8	PHENO	SZ/OZ	48.8827	1.8875	4.2113	0.0074	8.2823	0.2119	14.549	21.2012	0.5031	0.0027	99.7392	75.795	-0.000524793
Cima1_cpx8	PHENO	SZ/OZ	49.0251	2.0407	4.4517	0.0002	8.0269	0.1856	14.3103	21.5951	0.5351	0.0128	100.184	76.0651	0.00720725
Cima1_cpx8	PHENO	SZ/OZ	49.144	1.832	4.2973	0.0074	8.0085	0.1904	14.6691	21.4968	0.5334	-0.0005	100.178	76.5542	0.00136316
Cima1_cpx8	PHENO	SZ/OZ	49.0925	1.9257	4.511	0.0076	8.1891	0.2009	14.5261	21.2631	0.5191	-0.0195	100.216	75.9732	0.01015
Cima1_cpx8	PHENO	SZ/OZ	49.035	1.9073	4.423	0.0047	8.3287	0.2002	14.5926	21.0269	0.5018	-0.0101	100.01	75.7473	0.0086385
Cima1_cpx9	MICRO	SZ/OZ	43.2166	4.1463	9.9307	0.0793	8.767	0.1335	11.4926	21.7375	0.6454	0.0158	100.165	70.0311	0.0495931
Cima1_cpx9	MICRO	SZ/OZ	43.3602	4.1161	9.9135	0.0708	8.6771	0.1446	11.5643	21.5853	0.6432	0.0076	100.083	70.3768	0.0549418
Cima1_cpx9	MICRO	SZ/OZ	43.8112	3.7415	8.7781	0.056	8.4139	0.1354	11.9786	21.8021	0.6355	0.0048	99.357	71.734	0.0327356
Cima1_cpx9	MICRO	SZ/OZ	44.6263	3.3838	8.3361	0.14	7.9633	0.1559	12.4893	21.7831	0.6195	0.0059	99.5033	73.6547	0.035294
Cima1_cpx9	MICRO	SZ/OZ	47.8904	1.9768	4.9638	0.1123	7.5262	0.1592	14.2826	21.6698	0.521	0.0158	99.1179	77.1838	0.00455298
Cima1_cpx9	MICRO	SZ/OZ	48.8326	1.7636	4.2032	0.031	7.4779	0.1649	14.6777	21.7374	0.4862	0.0099	99.3845	77.7723	-0.000775508
Cima1_cpx9	MICRO	SZ/OZ	48.7277	1.6452	4.3151	0.0905	7.1809	0.1488	14.5069	21.92	0.4532	0.0178	99.0061	78.2666	0.00751937
Cima1_cpx9	MICRO	SZ/OZ	48.3232	1.8307	4.533	0.0504	7.7987	0.177	14.4231	21.528	0.5176	0.0074	99.1891	76.7267	0.000760383
Cima1_cpx9	MICRO	SZ/OZ	48.3538	1.8453	4.2697	0.0921	7.8374	0.1609	14.3894	21.3386	0.4268	0.0337	98.7478	76.5963	0.001852
Cima1_cpx10	PHENO	NS	51.6065	0.182	3.8091	0.0952	8.7774	0.2374	14.9508	19.27	0.9949	0.0225	99.9458	75.2251	0.0651337
Cima1_cpx10	PHENO	NS	50.8131	0.4471	4.76	0.1091	8.8516	0.2444	14.4774	19.2283	1.0428	0.0186	99.9924	74.4608	0.0783087
Cima1_cpx10	PHENO	NS	50.81	0.3684	4.5843	0.1131	8.7942	0.2425	14.6839	19.2329	1.0239	0.0287	99.8817	74.8519	0.071137
Cima1_cpx10	PHENO	NS	51.3272	0.2741	4.1535	0.1194	8.673	0.2262	14.9425	19.3105	0.9906	0.0262	100.043	75.4371	0.0670494
Cima1_cpx10	PHENO	NS	51.3073	0.3274	4.3309	0.1128	8.6081	0.2358	14.8456	19.2248	1.0093	0.0196	100.022	75.4558	0.0745581
Cima1_cpx10	PHENO	NS	50.7317	0.409	4.8561	0.1098	8.7492	0.2316	14.6205	19.286	1.043	0.0301	100.067	74.867	0.0758069
Cima1_cpx10	PHENO	NS	50.8724	0.2849	4.1168	0.1162	8.7056	0.2492	14.8925	19.3411	1.0209	0.02	99.6195	75.3053	0.0569856
Cima1_cpx10	PHENO	NS	50.8752	0.2633	4.1409	0.1086	8.7077	0.2252	14.9387	19.2519	1.0302	0.0191	99.5606	75.3584	0.058513
Cima1_cpx10	PHENO	NS	50.2103	0.4787	4.9521	0.1121	8.6717	0.2469	14.633	19.3135	1.0212	0.0089	99.6485	75.0501	0.0687021
Cima1_cpx10	PHENO	NS	50.484	0.4419	4.8213	0.102	8.7938	0.2247	14.5244	19.2167	0.9966	0.017	99.6225	74.6466	0.0757483
Cima1_cpx10	PHENO	NS	50.8066	0.4011	4.7592	0.1039	8.6826	0.234	14.6537	19.299	1.0204	0.0168	99.9773	75.053	0.0761394
Cima1_cpx10	PHENO	NS	50.9543	0.2625	4.0349	0.1057	8.637	0.2162	14.9374	19.3222	1.0382	0.0242	99.5326	75.5078	0.0572578
Cima1_cpx10	PHENO	NS	50.2506	0.4517	4.8409	0.1081	8.6851	0.2417	14.3684	19.325	1.0671	0.0294	99.368	74.6776	0.0727599
Cima1_cpx10	PHENO	NS	50.3774	0.419	4.6215	0.1405	8.9039	0.2314	14.4994	19.2669	1.0625	0.0108	99.5333	74.3776	0.0649593
Cima1_cpx10	PHENO	NS	50.6425	0.3116	4.3575	0.14	8.6854	0.2173	14.7951	19.2454	1.0227	0.0149	99.4323	75.2264	0.0627747
Cima1_cpx10	PHENO	NS	51.0416	0.2798	4.1475	0.1438	8.7329	0.2222	14.8625	19.2695	1.0121	0.0322	99.7442	75.2094	0.0627477
Cima1_cpx10	PHENO	NS	51.0568	0.2781	4.2133	0.1499	8.7464	0.226	14.8349	19.3994	1.0042	0.0213	99.9303	75.1459	0.0626469
Cima1_cpx10	PHENO	NS	50.5478	0.2982	4.3895	0.255	8.6582	0.215	14.575	19.3619	1.0457	0.0171	99.3635	75.0048	0.0637112
Cima1_cpx10	PHENO	NS	50.9635	0.2339	4.0411	0.2176	8.6492	0.2302	14.6737	19.5285	1.0283	0.0258	99.5916	75.1506	0.0594577
Cima1_cpx10	PHENO	NS	51.0458	0.1935	3.6825	0.2767	8.751	0.2351	14.7871	19.5026	1.0449	0.0231	99.5423	75.0758	0.0481055
Cima1_cpx10	PHENO	NS	50.5777	0.3485	4.3417	0.3691	8.6088	0.2155	14.278	19.5335	1.1144	0.012	99.3993	74.7251	0.0641579
Cima1_cpx11	PHENO	SZ/OZ	48.8583	1.8488	4.3079	0.0103	7.6571	0.1817	14.5463	21.7008	0.493	-0.0129	99.5912	77.2024	0.00253943
Cima1_cpx11	PHENO	SZ/OZ	47.7408	1.884	4.4571	0.0274	7.7045	0.1806	15.3791	21.5745	0.5915	0.0079	99.5474	78.0619	-0.0404905
Cima1_cpx11	PHENO	SZ/OZ	44.3675	3.3925	8.2374	0.0923	8.1381	0.1325	12.1785	21.9544	0.6132	0.014	99.1203	72.7343	0.0319963
Cima1_cpx11	PHENO	SZ/OZ	44.7133	3.2103	7.6274	0.019	8.1146	0.1582	12.3722	22.0817	0.5868	-0.0184	98.8651	73.103	0.0220909
Cima1_cpx11	PHENO	SZ/OZ	45.3129	3.237	7.7295	0.0206	8.206	0.1629	12.5186	21.9988	0.626	0.0213	99.8337	73.1141	0.0290153
Cima1_cpx11	PHENO	SZ/OZ	44.2649	3.4597	8.0392	0.0069	8.451	0.154	12.1212	21.9001	0.6492	0.0319	99.078	71.8845	0.0219309
Cima1_cpx11	PHENO	SZ/OZ	44.3386	3.2601	7.592	0.0177	8.8312	0.1721	13.2294	20.8869	0.6006	0.0118	98.9404	72.7549	0.00114953
Cima1_cpx11	PHENO	SZ/OZ	48.8193	1.8346	4.3562	0.0262	7.5741	0.1724	14.4918	21.7424	0.5118	0.0114	99.5402	77.3279	0.00393341
Cima1_cpx11	PHENO	SZ/OZ	48.6441	1.8036	4.4689	0.0711	7.4129	0.1872	14.4538	21.6305	0.4673	0.0073	99.1468	77.6573	0.0101083
Cima1_cpx12	PHENO	SZ/OZ	45.2492	3.0814	7.4914	0.1042	7.9308	0.1309	12.7001	21.8724	0.5393	0.0096	99.1094	74.0569	0.0291957
Cima1_cpx12	PHENO	SZ/OZ	48.1742	1.9697	4.7552	0.0013	7.8264	0.1776	14.3321	21.5415	0.5133	0.0114	99.3026	76.5499	0.00354221
Cima1_cpx12	PHENO	SZ/OZ	48.469	1.8389	4.3931	0.0037	7.6999	0.1836	14.5626	21.6291	0.5032	-0.0083	99.2748	77.1239	-0.00273768
Cima1_cpx12	PHENO	SZ/OZ	48.7274	1.7649	4.4066	0.0077	7.485	0.1643	14.6052	21.6742	0.5111	0.0164	99.3629	77.6701	0.00425481
Cima1_cpx12	PHENO	SZ/OZ	48.7871	1.8379	4.213	0.0236	7.5295	0.1627	14.4629	21.856	0.4746	0.0111	99.3585	77.3963	0.000869604
Cima1_cpx12	PHENO	SZ/OZ	48.3721	1.8084	4.3159	0.0026	7.7573	0.1806	14.3082	21.3956	0.534	0.0105	98.6854	76.6789	0.00374921
Cima1_cpx12	PHENO	SZ/OZ	48.9956	1.7921	4.0561	0.0095	7.7989	0.187	14.6149	21.7973	0.4895	-0.003	99.7377	76.9613	-0.00574385
Cima1_cpx12	PHENO	SZ/OZ	48.3068	1.9479	4.3886	0.017	7.6434	0.1553	14.2179	21.9341	0.4861	0.0197	99.1167	76.8299	-0.00261529
Cima1_cpx12	PHENO	SZ/OZ	48.7324	1.8133	4.3297	0.0061	7.4908	0.1676	14.6599	21.6258	0.5115	0.0014	99.3385	77.7215	0.0015326
Cima1_cpx12	PHENO	SZ/OZ	48.0903	2.0429	4.5464	0.0185	7.9445	0.1939	14.3251	21.6585	0.4519	0.0019	99.274	76.2712	-0.00585679
Cima1_cpx13	PHENO	SZ/OZ	49.1385	1.9661	4.3349	0.033	8.0261	0.1726	14.5003	21.6688	0.4584	0.005	100.304	76.3062	0.0035867
Cima1_cpx13	PHENO	SZ/OZ	45.7733	2.8041	7.3968	0.0538	8.2418	0.1405	12.6081	21.937	0.5923	-0.0001	99.5475	73.1685	0.0359871
Cima1_cpx13	PHENO	SZ/OZ	46.0561	2.7788	7.3436	0.1592	7.7953	0.147	12.9904	22.1025	0.5883	0.0175	99.9787	74.8148	0.0314817
Cima1_cpx13	PHENO	SZ/OZ	49.6017	1.766	4.2314	0.0221	7.7347	0.1698	14.7251	21.7249	0.4853	0.0071	100.468	77.2399	0.00908403
Cima1_cpx13	PHENO	SZ/OZ	45.634	2.9207	7.4797	0.0369	8.1153	0.1576	12.5464	21.7954	0.6093	0.0089	99.3042	73.3754	0.0394473
Cima1_cpx13	PHENO	SZ/OZ	48.4914	2.1046	4.6198	0.0125	8.1864	0.195	14.1385	21.4849	0.4927	0.0131	99.739	75.4822	0.00572349
Cima1_cpx13	PHENO	SZ/OZ	49.433	1.7643	4.2146	0.0238	7.5187	0.1729	14.519	21.7696	0.4666	0.0313	99.9139	77.489	0.0140182
Cima1_cpx13	PHENO	SZ/OZ	48.9087	2.028	4.4445	0.0365	7.8131	0.1866	14.4132	21.5382	0.453	0.0113	99.8332	76.6815	0.00900048
Cima1_cpx14a	PHENO	verm	47.2535	2.2292	5.6776	0.0143	7.7025	0.1493	13.647	21.9567	0.5713	0.0158	99.217	75.9519	0.0138808
Cima1_cpx14a	PHENO	verm	48.1141	1.7232	4.5775	0.0574	8.2696	0.1673	14.1792	21.4531	0.5598	0.0014	99.1026	75.348	-0.00104276
Cima1_cpx14a	PHENO	verm	47.4507	2.2724	5.9556	0.0096	7.8533	0.1436	13.5458	21.714	0.6574	0.0119	99.6142	75.4584	0.025517
Cima1_cpx14a	PHENO	verm	47.1637	2.3312	5.8516	0.0122	7.8511	0.1597	13.4573	21.7253	0.5822	0.0118	99.146	75.342	0.0217756
Cima1_cpx14a	PHENO	verm	48.8127	1.5551	4.2862	0.0296	8.5847	0.1964	14.2739	21.2663	0.4956	0.0118	99.5124	74.7726	0.00613654
Cima1_cpx14a	PHENO	verm	54.8826	1.5228	15.8452	0.003	4.3665	0.1038	5.502	13.5659	2.7498	0.0003	98.5419	69.1943	0.768003
Cima1_cpx14a	PHENO	verm	47.8125	2.0685	5.0427	0.0202	7.8104	0.1584	13.9204	21.8776	0.5465	0.003	99.2602	76.06	0.00571768
Cima1_cpx14a	PHENO	verm	50.4461	0.9912	2.7323	0.0192	9.4373	0.2651	14.9811	20.478	0.4176	0.0382	99.8061	73.8887	-0.00545569
Cima1_cpx14a	PHENO	verm	50.092	1.0619	2.9004	0.017	9.5182	0.2463	14.6026	20.6278	0.4347	0.0119	99.5129	73.2249	-0.00296946
Cima1_cpx14a	PHENO	verm	48.6237	1.6623	4.1545	0.0046	8.4212	0.1847	13.9937	21.4933	0.506	0.0045	99.0484	74.7614	0.00434886
Cima1_cpx14a	PHENO	verm	46.5417	2.4257	6.0729	0.0242	7.8816	0.1609	13.3016	22.0047	0.5874	0.0101	99.0107	75.0527	0.0116264
Cima1_cpx14a	PHENO	verm	47.7991	2.1422	4.9224	0.0066	8.0487	0.163	13.7847	21.7339	0.5685	0.0018	99.171	75.3268	0.0041085
Cima1_cpx14a	PHENO	verm	48.9644	1.6231	3.8935	0.0052	8.3882	0.1806	14.2387	21.2577	0.5394	0.0133	99.1041	75.1608	0.00267847
Cima1_cpx14a	PHENO	verm	47.1573	2.7107	6.0044	0.0038	8.1656	0.1703	13.0859	21.3748	0.7843	0.0247	99.4818	74.0712	0.0248295
Cima1_cpx14a	PHENO	verm	49.6623	3.2642	13.4149	0.0056	9.681	0.1703	7.926	14.5564	0.7025	0.0051	99.3882	59.3403	0.49668
Cima1_cpx14a	PHENO	verm	47.4533	2.3059	5.5436	0.0127	7.9873	0.1638	13.6587	21.8789	0.5763	0.009	99.5895	75.2985	0.0100685
Cima1_cpx14a	PHENO	verm	49.33	1.7037	4.1816	0.019	8.6341	0.1832	14.2102	21.3102	0.5456	0.0197	100.137	74.5795	0.00997322
Cima1_cpx14a	PHENO	verm	48.0979	2.2225	5.3289	-0.0006	7.8942	0.16	13.7408	21.7753	0.5941	0.0076	99.8205	75.6265	0.0193734
Cima1_cpx14a	PHENO	verm	47.0935	2.6492	6.4336	0.0101	8.1084	0.162	13.3596	21.8131	0.6857	0.0029	100.318	74.6003	0.0220412
Cima1_cpx14a	PHENO	verm	49.9249	1.9247	3.6589	0.0478	8.5276	0.213	14.7503	20.7369	0.5858	0.0064	100.376	75.5105	0.00253688
Cima1_cpx14a	PHENO	verm	46.2861	2.8311	7.0212	0.0126	7.9886	0.1476	12.8213	22.0169	0.5874	-0.0075	99.7052	74.0998	0.0340406
Cima1_cpx14a	PHENO	verm	46.2861	3.0674	7.488	0.0221	8.0584	0.1628	12.7333	22.0072	0.5805	0.013	100.419	73.7995	0.041817
Cima1_cpx14a	PHENO	verm	45.381	3.1284	7.7341	0.0174	8.1169	0.1432	12.6932	21.6638	0.6346	0.0096	99.522	73.5982	0.0354404
Cima1_cpx14a	PHENO	verm	49.2055	1.8604	4.3991	-0.0035	7.6954	0.1668	14.4364	21.7444	0.5006	-0.0028	100.002	76.9803	0.0123746
Cima1_cpx14a	PHENO	verm	48.4117	2.0768	5.2394	0.0248	7.6776	0.168	13.9804	21.8591	0.497	0.0278	99.9625	76.4483	0.0228378
Cima1_cpx14a	PHENO	verm	47.0735	2.5929	6.577	0.0143	7.8303	0.1649	13.321	21.8697	0.5777	0.0164	100.038	75.2019	0.0333191
Cima1_cpx14a	PHENO	verm	48.4769	2.1677	5.6206	0.022	7.6885	0.1684	13.888	21.8656	0.5315	0.0027	100.432	76.3031	0.0324355
Cima1_cpx14b	PHENO	verm	43.7235	3.7126	8.2996	0.0094	8.4806	0.1579	11.8091	21.8037	0.6571	-0.0047	98.6489	71.2828	0.0245002
Cima1_cpx14b	PHENO	verm	44.6547	3.3892	7.9499	0.0229	8.1979	0.1432	12.3416	21.891	0.6274	0.0224	99.2403	72.8528	0.0270353
Cima1_cpx14b	PHENO	verm	44.7272	3.4531	8.0003	0.0035	8.2092	0.1526	12.1503	21.8664	0.6021	0.0206	99.1851	72.5153	0.0353835
Cima1_cpx14b	PHENO	verm	44.5616	3.3547	7.8424	0.0219	8.1074	0.1464	12.2201	21.7951	0.6114	0.0164	98.6775	72.8767	0.0309444
Cima1_cpx14b	PHENO	verm	43.6828	3.6805	8.5518	0.0068	8.3429	0.1453	11.9399	21.8064	0.6303	0.0106	98.7974	71.8401	0.0291175
Cima1_cpx14b	PHENO	verm	44.2892	3.3984	7.7978	0.0177	8.2438	0.1434	12.31	21.8786	0.6058	0.0192	98.7037	72.6914	0.0180784
Cima1_cpx14b	PHENO	verm	44.4946	3.3333	7.681	0.0164	8.1632	0.1645	12.3507	21.8634	0.6084	-0.0009	98.6745	72.9512	0.0206179
Cima1_cpx14b	PHENO	verm	44.1634	3.5862	7.8661	0.016	8.3355	0.1513	12.1086	21.7077	0.6154	0.0019	98.5523	72.1409	0.0221252
Cima1_cpx14b	PHENO	verm	45.344	2.8945	7.0093	0.0181	7.9902	0.1451	12.6708	21.8668	0.6432	0.0057	98.5876	73.8687	0.0205304
Cima1_cpx14b	PHENO	verm	45.1639	3.0126	7.2087	0.0086	8.0543	0.1442	12.648	21.9697	0.609	0.0054	98.8245	73.6792	0.0187672
Cima1_cpx14b	PHENO	verm	44.8315	3.1101	7.3762	0.0104	8.1592	0.1479	12.4146	21.9404	0.587	0.0038	98.581	73.0625	0.0211202
Cima1_cpx14b	PHENO	verm	43.8737	3.6567	7.9801	0.0019	8.4394	0.1452	11.9001	21.9258	0.6482	-0.0028	98.5683	71.5389	0.017234
Cima1_cpx14b	PHENO	verm	48.2139	1.8676	4.3279	0.0256	7.583	0.1786	14.3124	21.5656	0.5207	0.0053	98.6006	77.088	-0.000349686
Cima1_cpx14b	PHENO	verm	48.0858	1.8337	4.2754	0.0345	7.5588	0.1869	14.3306	21.8237	0.4806	0.0145	98.6244	77.1668	-0.00775564
Cima1_cpx15	PHENO	NS	49.4504	1.3539	5.845	0.2203	7.923	0.1635	14.4374	19.5528	1.3313	0.0108	100.288	76.461	0.0626958
Cima1_cpx15	PHENO	NS	50.6398	0.828	4.1682	0.1525	7.6953	0.1783	14.7528	20.8385	0.83	0.0218	100.105	77.3625	0.0430414
Cima1_cpx15	PHENO	NS	50.6896	0.7907	4.2525	0.125	7.5169	0.1869	14.7064	21.0506	0.8005	0.0311	100.15	77.7161	0.0472408
Cima1_cpx15	PHENO	NS	50.5657	0.681	4.1746	0.1471	7.5281	0.1828	14.6757	20.8672	0.824	0.0149	99.661	77.6541	0.0484747
Cima1_cpx15	PHENO	NS	50.1489	0.8003	4.8082	0.1408	7.6583	0.1892	14.4082	20.8421	0.8156	0.0362	99.8478	77.0313	0.0586558
Cima1_cpx15	PHENO	NS	50.4761	0.7723	4.846	0.1646	7.739	0.1925	14.4914	20.5987	0.8763	0.0277	100.185	76.9476	0.0645824
Cima1_cpx15	PHENO	NS	49.8405	0.7942	4.5796	0.2776	7.6323	0.1938	14.4061	20.9081	0.8452	0.013	99.4903	77.0888	0.0446699
Cima1_cpx16	PHENO	SZ/OZ	43.4204	4.0128	8.8759	0.0703	8.5371	0.1366	11.7985	21.9225	0.6129	0.011	99.3979	71.1282	0.0249116
Cima1_cpx16	PHENO	SZ/OZ	44.6848	3.5534	7.6171	0.0035	8.4699	0.1889	12.3244	21.6325	0.7106	0.0109	99.196	72.1745	0.0161925
Cima1_cpx16	PHENO	SZ/OZ	43.0061	4.5003	8.9185	-0.0046	8.8097	0.1683	11.5193	21.8437	0.7207	0.0103	99.4922	69.9778	0.0131678
Cima1_cpx16	PHENO	SZ/OZ	49.5791	1.7352	4.1786	-0.0045	7.5834	0.1835	14.9491	21.4482	0.5044	0.0122	100.169	77.8468	0.00904473
Cima1_cpx16	PHENO	SZ/OZ	49.1451	1.7929	4.1381	0.0051	7.6001	0.175	14.6516	21.6137	0.5142	0.0025	99.6382	77.4598	0.00384287
Cima1_cpx16	PHENO	SZ/OZ	49.0447	1.6841	3.9107	0.0003	7.5722	0.2045	14.7259	21.4541	0.5272	0.0191	99.1428	77.6119	-0.00102159
Cima1_cpx16	PHENO	SZ/OZ	48.7606	1.9525	4.1996	0.0055	8.011	0.2175	14.3883	21.609	0.5007	-0.0057	99.639	76.1999	-0.00326021
Cima1_cpx16	PHENO	SZ/OZ	47.6915	2.1145	4.7705	0.0114	8.2134	0.1786	14.0532	21.7151	0.4821	0.0032	99.2335	75.3089	-0.00787205
Cima1_cpx17	MICRO	SZ/OZ	43.5932	3.6712	8.8331	0.1355	8.3103	0.1372	11.9546	21.7329	0.6343	0.0095	99.0117	71.9441	0.0334086
Cima1_cpx17	MICRO	SZ/OZ	44.2486	3.5461	8.1271	0.049	8.4284	0.1483	12.0862	21.8397	0.6313	0.0057	99.1103	71.8802	0.0254045
Cima1_cpx17	MICRO	SZ/OZ	44.3739	3.549	8.1454	0.06	8.3824	0.1396	12.0938	21.7175	0.5985	0.0121	99.0722	72.0034	0.0321433
Cima1_cpx17	MICRO	SZ/OZ	45.344	2.838	7.4151	0.0268	8.0613	0.1486	12.7909	21.8962	0.6196	0.011	99.1515	73.8798	0.0256525
Cima1_cpx17	MICRO	SZ/OZ	43.8967	3.9482	8.5375	0.0208	8.6929	0.1529	11.7973	21.6891	0.6513	0.0046	99.3914	70.7533	0.0288118
Cima1_cpx17	MICRO	SZ/OZ	48.1731	1.9737	4.7658	0.0924	8.4074	0.1902	14.5128	20.9425	0.4526	-0.0046	99.506	75.4728	0.002391
Cima1_cpx17	MICRO	SZ/OZ	48.3341	1.9719	4.86	0.021	8.3914	0.1938	14.4063	21.0415	0.5002	0.0184	99.7387	75.3716	0.00768412
Cima1_cpx17	MICRO	SZ/OZ	48.3829	1.8265	4.8615	0.1194	7.3841	0.1532	14.3348	21.7352	0.4663	-0.0053	99.2587	77.5813	0.0152439
Cima1_cpx17	MICRO	SZ/OZ	48.0217	2.16	5.0092	0.0536	8.0552	0.1777	14.2368	21.4707	0.4744	0.0113	99.6706	75.9069	0.00467396
Cima1_cpx18	PHENO	SZ/OZ	49.6033	1.7979	4.3295	0.0456	7.9189	0.2021	14.9044	21.0442	0.4864	0.0065	100.339	77.0383	0.0156105
Cima1_cpx18	PHENO	SZ/OZ	42.8952	4.0621	9.6463	0.1401	8.6852	0.1458	11.387	21.5284	0.6436	0.0303	99.1638	70.0341	0.0461406
Cima1_cpx18	PHENO	SZ/OZ	43.5808	3.7797	8.7039	0.1535	8.5121	0.1375	11.8352	21.6268	0.6269	-0.0011	98.9553	71.2521	0.0312999
Cima1_cpx18	PHENO	SZ/OZ	43.9501	3.6294	8.5543	0.1742	8.3435	0.1314	11.8729	21.6836	0.5991	0.0157	98.9542	71.7247	0.0380173
Cima1_cpx18	PHENO	SZ/OZ	44.1896	3.5905	8.3254	0.1239	8.3609	0.1293	12.1109	21.831	0.5639	0.0053	99.2305	72.0835	0.0301337
Cima1_cpx18	PHENO	SZ/OZ	43.732	3.8671	8.7206	0.0406	8.7591	0.1471	11.6782	21.6639	0.6508	0.0101	99.2696	70.385	0.0334999
Cima1_cpx18	PHENO	SZ/OZ	43.9294	3.8283	8.528	0.0332	8.7833	0.1451	11.9221	21.4935	0.6962	0.0022	99.3614	70.757	0.0283216
Cima1_cpx18	PHENO	SZ/OZ	43.575	3.9063	8.5703	0.0291	8.7	0.1419	11.668	21.6425	0.6684	0.0088	98.9104	70.5078	0.0280596
Cima1_cpx18	PHENO	SZ/OZ	49.1662	1.7906	4.1871	0.0221	7.4875	0.1821	14.5492	21.8953	0.4988	0.0102	99.7889	77.5976	0.00436667
Cima1_cpx19	PHENO	SZ/OZ	45.6264	2.9162	7.1627	0.2142	7.7523	0.1372	12.8639	21.9064	0.5264	0.0162	99.1219	74.7346	0.0274697
Cima1_cpx19	PHENO	SZ/OZ	48.7772	1.8788	4.4241	0.0145	7.5988	0.1773	14.3376	21.669	0.4931	0.0155	99.3859	77.0823	0.0100677
Cima1_cpx19	PHENO	SZ/OZ	47.821	2.3296	5.3153	0.0182	8.1138	0.1769	13.7973	21.5319	0.511	0.0096	99.6245	75.1938	0.0146492
Cima1_cpx19	PHENO	SZ/OZ	47.7694	2.255	5.235	0.0124	7.9153	0.1851	14.086	21.7448	0.5052	0.0121	99.7202	76.0323	0.00390646
Cima1_cpx19	PHENO	SZ/OZ	47.9622	2.2328	5.2018	0.0629	7.9532	0.1611	14.0269	21.7151	0.4906	0.0317	99.8383	75.8683	0.00854599
Cima1_cpx19	PHENO	SZ/OZ	45.4854	2.9633	7.6362	0.021	8.7058	0.1549	12.3881	21.6517	0.6766	0.001	99.6839	71.7241	0.0355375
Cima1_cpx19	PHENO	SZ/OZ	45.3711	3.1369	7.4486	0.0199	8.4542	0.1692	12.5631	21.6006	0.6464	0.0039	99.4139	72.595	0.0277729
Cima1_cpx19	PHENO	SZ/OZ	44.6669	3.5585	7.9082	-0.0001	8.6424	0.1682	12.1618	21.5932	0.6662	0.0085	99.3738	71.4979	0.0268141
Cima1_cpx19	PHENO	SZ/OZ	45.3691	3.1987	7.4618	0.0078	8.2139	0.1504	12.5921	21.9511	0.6476	0.0218	99.6141	73.2102	0.023179
oxide wt %	pheno vs micro	Texture	SiO2	TiO2	Al2O3	Cr2O3	FeO	MnO	MgO	CaO	Na2O	NiO	sum	Mg#	Al VI
Cima2_cpx1	PHENO	verm	52.4341	0.9213	1.1662	-0.0114	8.9345	0.2235	14.3678	20.1875	0.7169	-0.0056	98.9348	74.1377	0.0203901
Cima2_cpx1	PHENO	verm	53.638	0.515	0.6834	0.004	8.5671	0.2438	14.5099	21.8006	0.474	0.0208	100.457	75.1191	0.0146968
Cima2_cpx2	PHENO	verm	50.2276	1.9078	2.9716	0.0223	8.0214	0.1976	14.662	21.8776	0.4554	-0.0125	100.331	76.5166	-0.0135523
Cima2_cpx2	PHENO	verm	46.9498	2.8099	6.6278	0.0272	7.7885	0.1499	13.0143	21.6568	0.5062	0.0282	99.5587	74.8658	0.0451099
Cima2_cpx2	PHENO	verm	48.294	2.5722	4.5951	0.017	8.2048	0.1869	13.6169	22.0466	0.5358	0.0249	100.094	74.7375	-0.00365436
Cima2_cpx2	PHENO	verm	49.1586	2.1613	4.7308	0.0966	7.9854	0.1738	13.6701	21.4741	0.6	0.0074	100.058	75.3184	0.0315062
Cima2_cpx2	PHENO	verm	49.9202	1.8906	3.553	0.0293	8.0398	0.1894	14.35	21.5685	0.4822	0.0156	100.039	76.0863	0.006805
Cima2_cpx3	MICRO	SZ/OZ	48.5081	1.9306	4.104	0.1409	8.2161	0.1848	14.1876	21.2179	0.4746	0.0197	98.9842	75.4793	-0.000545565
Cima2_cpx3	MICRO	SZ/OZ	49.2501	1.8537	4.3241	0.1624	7.8039	0.1682	14.6339	21.3556	0.4388	0.0063	99.997	76.973	0.0117842
Cima2_cpx3	MICRO	SZ/OZ	48.6284	1.9986	4.1846	0.124	7.8876	0.2069	14.6354	21.536	0.39	0.0142	99.6056	76.7852	-0.00822055
Cima2_cpx3	MICRO	SZ/OZ	48.7647	1.9888	4.3541	0.1525	7.9757	0.1903	14.7352	21.4389	0.3808	0.0198	100.001	76.7082	-0.00394542
Cima2_cpx3	MICRO	SZ/OZ	48.6992	1.9393	4.1349	0.1593	7.7714	0.2048	14.6862	21.5856	0.4156	0.0064	99.6028	77.1099	-0.00899939
Cima2_cpx3	MICRO	SZ/OZ	48.6751	2.0714	4.3395	0.1613	8.0793	0.1563	14.3064	21.4705	0.4005	0.0166	99.6768	75.9414	0.00231861
Cima2_cpx3	MICRO	SZ/OZ	45.8978	2.814	6.8611	0.2379	8.1486	0.1632	13.0342	21.8817	0.528	0.0145	99.581	74.0352	0.0159977
Cima2_cpx3	MICRO	SZ/OZ	47.5924	2.552	4.8337	0.0466	8.2247	0.1772	13.3784	21.9885	0.5493	0.0014	99.3442	74.3563	-0.0041501
Cima2_cpx3	MICRO	SZ/OZ	47.8063	2.6457	4.7943	0.0407	8.3617	0.1611	13.489	22.0204	0.5419	0.0102	99.8713	74.198	-0.00770437
Cima2_cpx4	PHENO	verm	49.5317	2.031	3.4792	0.0474	8.1165	0.195	14.3026	21.979	0.4676	0.0005	100.151	75.8525	-0.011621
Cima2_cpx4	PHENO	verm	48.3599	2.4984	4.5028	0.0935	8.1406	0.1791	13.6612	21.9881	0.5338	0.0264	99.9838	74.9466	-0.00344254
Cima2_cpx4	PHENO	verm	47.4028	2.2621	6.5822	0.3048	7.6128	0.1588	13.9835	21.1025	0.6332	0.0091	100.052	76.6046	0.0383499
Cima2_cpx4	PHENO	verm	47.9955	2.7013	5.0265	0.2104	8.09	0.1696	13.4259	22.042	0.5196	0.0068	100.188	74.7369	0.00387711
Cima2_cpx4	PHENO	verm	49.0971	2.2368	4.221	0.132	7.8479	0.1611	14.1832	22.0456	0.4811	0.0071	100.413	76.3124	-0.00146909
Cima2_cpx4	PHENO	verm	50.0152	1.9255	3.0484	0.0379	8.1063	0.1956	14.5349	21.7427	0.4445	0.0154	100.066	76.1692	-0.0114744
Cima2_cpx5	MICRO	NS	50.0299	1.9506	3.199	0.047	7.7758	0.1737	14.4583	22.0317	0.4827	0.0055	100.154	76.8226	-0.00770181
Cima2_cpx5	MICRO	NS	49.7746	2.0041	3.3575	0.0572	7.8025	0.1735	14.3791	22.0605	0.4985	0.0157	100.123	76.6634	-0.00936386
Cima2_cpx5	MICRO	NS	49.6747	1.9603	3.356	0.0326	7.8812	0.1719	14.4053	22.2219	0.5115	0.0001	100.216	76.5161	-0.015588
Cima2_cpx5	MICRO	NS	49.7307	1.9402	3.2719	0.033	7.8374	0.1839	14.3206	22.1024	0.4357	0.0031	99.8589	76.5103	-0.00839184
Cima2_cpx5	MICRO	NS	50.2079	1.7846	2.8524	0.0219	7.9886	0.2057	14.6203	22.047	0.4176	-0.0124	100.134	76.5391	-0.0153541
Cima2_cpx5	MICRO	NS	49.6976	1.9192	3.3148	0.0323	8.0453	0.164	14.5022	21.7061	0.4707	0.0069	99.8591	76.2653	-0.00908318
Cima2_cpx5	MICRO	NS	48.6562	1.9402	3.7354	0.0209	8.3853	0.2221	13.8227	21.3046	0.4704	0.015	98.5727	74.6097	0.00116723
Cima2_cpx5	MICRO	NS	51.9168	0.4922	2.8826	0.0383	9.9377	0.3798	14.3724	19.6611	0.7088	0.0071	100.397	72.052	0.0455899
Cima2_cpx5	MICRO	NS	51.6004	0.5375	2.8305	0.041	10.0259	0.3867	14.4456	19.6525	0.7149	-0.0013	100.234	71.9763	0.0345838
Cima2_cpx5	MICRO	NS	47.4609	2.8928	5.2867	0.0305	8.8717	0.198	13.1672	21.363	0.6414	-0.0051	99.9071	72.5704	0.00368633
Cima2_cpx6	PHENO	verm	47.1621	2.7287	5.6115	0.3317	8.2347	0.1708	13.1075	21.8373	0.4939	0.0091	99.6873	73.9409	0.010582
Cima2_cpx6	PHENO	verm	47.6544	2.5244	5.6361	0.0917	7.7605	0.164	13.7427	22.0797	0.5199	0.0012	100.174	75.9425	0.0108251
Cima2_cpx6	PHENO	verm	47.7846	2.4326	5.437	0.056	7.8393	0.1564	13.7842	21.7936	0.5342	0.0216	99.8395	75.8128	0.0133606
Cima2_cpx6	PHENO	verm	53.6608	0.2298	27.839	0.0008	0.7543	-0.0037	0.1408	11.2943	5.2417	0.0013	99.159	24.9669	1.16357
Cima2_cpx6	PHENO	verm	46.1406	2.7888	8.8293	0.0207	7.8623	0.156	13.7206	19.8977	0.7866	0.0157	100.218	75.674	0.0824174
Cima2_cpx6	PHENO	verm	49.0798	2.1282	4.0366	0.0532	8.0686	0.1766	13.681	21.8713	0.4927	0.0089	99.597	75.1401	0.0101656
Cima2_cpx6	PHENO	verm	47.7071	2.533	5.2218	0.1235	8.3071	0.1832	13.5078	21.4384	0.5536	0.0178	99.5933	74.3497	0.0112956
Cima2_cpx6	PHENO	verm	48.7162	2.3546	5.0094	0.1115	7.7302	0.1733	13.2368	21.4792	0.6556	0.0293	99.4961	75.3234	0.0403314
Cima2_cpx7	MICRO	SZ/OZ	47.7958	2.8397	5.1867	0.027	8.3415	0.1849	13.3497	22.0533	0.532	0.0072	100.318	74.0452	0.00173527
Cima2_cpx7	MICRO	SZ/OZ	48.9781	2.2504	3.8802	0.0252	8.5984	0.206	13.8432	21.6109	0.5148	-0.0057	99.9013	74.1597	-0.00505009
Cima2_cpx7	MICRO	SZ/OZ	47.0073	2.91	5.7739	0.1327	8.1508	0.163	13.1919	22.0253	0.5157	0.0173	99.8878	74.2606	0.00607349
Cima2_cpx7	MICRO	SZ/OZ	46.4159	3.4729	5.9667	0.0266	8.977	0.1822	12.6213	21.6478	0.578	0.022	99.9106	71.4795	0.000941487
Cima2_cpx7	MICRO	SZ/OZ	48.3331	2.4046	4.4852	0.0399	8.1408	0.1734	13.5372	22.1085	0.5269	-0.0003	99.7493	74.7745	-0.000453789
Cima2_cpx7	MICRO	SZ/OZ	47.6083	2.8137	5.1352	0.0221	8.3611	0.1672	13.2854	22.0914	0.5579	0.0059	100.048	73.9071	-0.00232242
Cima2_cpx7	MICRO	SZ/OZ	48.091	2.5971	4.7454	0.0276	8.2566	0.1636	13.3767	22.1469	0.539	0.0122	99.9561	74.28	-0.00033647
Cima2_cpx7	MICRO	SZ/OZ	47.8215	2.7414	4.8841	0.0259	8.3032	0.1757	13.333	21.9505	0.5541	0.0094	99.7987	74.1096	-0.000573108
Cima2_cpx7	MICRO	SZ/OZ	49.6178	2.0654	3.5089	0.0437	7.8883	0.1812	14.314	21.9984	0.4845	0.0116	100.114	76.3854	-0.00749832
Cima2_cpx7	MICRO	SZ/OZ	49.7696	2.1111	3.2334	0.0214	7.9615	0.1965	14.3197	21.9911	0.4804	0.0146	100.099	76.2256	-0.0123147
Cima2_cpx8	PHENO	verm	48.9405	2.1652	3.7099	0.048	7.9172	0.1715	14.088	21.9612	0.5068	0.0172	99.5255	76.0306	-0.0113532
Cima2_cpx8	PHENO	verm	47.6797	2.5689	4.9369	0.0344	8.2323	0.1623	13.5681	21.9108	0.5578	0.0152	99.6665	74.6063	-0.00440559
Cima2_cpx8	PHENO	verm	47.3134	2.763	5.4142	0.0486	8.2997	0.1785	13.3119	21.7677	0.5349	0.008	99.64	74.0873	0.00591161
Cima2_cpx8	PHENO	verm	47.9284	2.393	4.4974	0.1392	8.0672	0.1835	13.6576	21.789	0.5279	0.0184	99.2015	75.1113	-0.00535623
Cima2_cpx8	PHENO	verm	47.3835	2.7091	4.9041	0.162	8.1325	0.1646	13.3288	21.8836	0.5514	0.0155	99.2351	74.5002	-0.00559643
Cima2_cpx8	PHENO	verm	47.8562	2.6174	4.9683	0.0685	8.323	0.1674	13.5441	21.9574	0.5247	-0.0122	100.015	74.3645	-0.0017919
Cima2_cpx8	PHENO	verm	48.7829	2.4409	4.3906	0.0551	8.1635	0.1759	13.9779	21.9614	0.5224	-0.0138	100.457	75.3223	-0.00418577
Cima2_cpx9	MICRO	verm	52.8597	0.5404	0.8006	0.0228	8.1718	0.2111	15.5322	21.4491	0.5305	0.0162	100.134	77.2116	-0.014214
Cima2_cpx9	MICRO	verm	52.9676	0.4847	0.6468	0.0234	8.239	0.2015	15.9838	21.1674	0.5415	0.0118	100.267	77.5697	-0.0227874
Cima2_cpx9	MICRO	verm	48.1166	2.1585	4.3304	0.3567	7.7577	0.1847	13.8466	21.8824	0.5544	0.0177	99.2056	76.0864	-0.00865811
Cima2_cpx9	MICRO	verm	48.7194	1.427	4.7941	0.378	7.3097	0.1731	15.4304	20.5176	0.534	0.0476	99.331	79.0047	0.0133113
Cima2_cpx9	MICRO	verm	46.7235	1.9597	6.8711	0.3678	7.4447	0.1311	13.8409	21.0938	0.592	0.0134	99.0379	76.8204	0.0442523
Cima2_cpx9	MICRO	verm	46.6455	2.0686	7.1672	0.5033	7.5646	0.1617	13.4305	21.447	0.6035	0.0124	99.604	75.9898	0.0472304
Cima2_cpx10	MICRO	NS	47.1204	2.1533	7.2865	0.2314	7.5015	0.1472	13.6287	21.251	0.6168	0.021	99.9577	76.4074	0.0602174
Cima2_cpx10	MICRO	NS	47.9938	2.56	5.4881	0.1281	8.0735	0.1656	13.3855	21.8865	0.6613	-0.0016	100.341	74.7185	0.0168445
Cima2_cpx10	MICRO	NS	48.5543	2.3499	5.0073	0.1593	7.9789	0.1944	13.7846	21.7818	0.5149	0.0071	100.333	75.4882	0.0161795
Cima2_cpx10	MICRO	NS	51.6573	1.4264	13.8976	0.0436	6.3686	0.14	7.6968	13.1576	4.7519	0.0149	99.1548	68.2979	0.496513
Cima2_cpx10	MICRO	NS	48.4313	2.0763	4.9792	0.0914	8.3615	0.1898	14.0066	21.3727	0.5754	0.0179	100.102	74.9127	0.0119915
Cima2_cpx10	MICRO	NS	48.2523	1.8711	6.3276	0.1288	8.8071	0.2004	14.3408	19.4583	0.6488	0.0033	100.038	74.3763	0.0596923
Cima2_cpx10	MICRO	NS	49.8602	1.4262	4.4227	0.3184	7.1349	0.1677	15.4178	21.0897	0.551	0.011	100.399	79.39	0.0187837
Cima2_cpx10	MICRO	NS	48.245	1.8356	5.8772	0.2949	7.2432	0.1533	14.3279	21.4308	0.5305	0.0171	99.9555	77.9063	0.0378326
Cima2_cpx11	PHENO	verm	51.4555	1.0562	1.3626	0.0145	8.6785	0.222	14.6343	21.7518	0.5082	-0.0013	99.6822	75.037	-0.0234004
Cima2_cpx11	PHENO	verm	52.8067	0.3884	0.2766	-0.0099	8.9867	0.2182	14.5729	22.3478	0.4087	0.0196	100.016	74.2975	-0.0241201
Cima2_cpx11	PHENO	verm	50.3827	1.6222	2.8296	0.0358	7.9745	0.172	14.6136	22.0991	0.4574	0.0201	100.207	76.5626	-0.0125071
Cima2_cpx11	PHENO	verm	52.5361	0.8801	1.1695	0.0204	8.5237	0.202	14.6027	21.2848	0.5889	0.0119	99.82	75.3325	0.00478486
Cima2_cpx12	PHENO	verm	48.2658	2.4209	4.2753	0.0239	8.133	0.1967	13.6037	21.9078	0.5702	0.0268	99.4241	74.8849	-0.00633574
Cima2_cpx12	PHENO	verm	52.6828	0.7341	0.73	0.0179	9.275	0.2889	17.0967	18.8624	0.4262	0.0254	100.139	76.6675	-0.0282635
Cima2_cpx12	PHENO	verm	47.0129	2.7769	5.1203	0.033	8.4347	0.1808	13.2707	21.9121	0.6024	0.0101	99.354	73.7163	-0.012438
Cima2_cpx13	PHENO	verm	49.0969	2.3534	3.6088	0.0164	8.1035	0.1671	13.9383	22.1369	0.4812	-0.0036	99.8989	75.4066	-0.0137838
Cima2_cpx13	PHENO	verm	49.2795	1.976	3.4141	0.0315	8.1835	0.1948	14.7284	21.3615	0.4661	-0.0027	99.6327	76.2372	-0.0172128
Cima2_cpx13	PHENO	verm	49.0006	2.5747	3.8199	0.0123	8.6272	0.2289	13.3554	21.7217	0.6357	0.0141	99.9904	73.4011	-0.00428236
Cima2_cpx13	PHENO	verm	48.8112	2.2133	4.0152	0.0609	8.0063	0.1733	14.1831	21.9415	0.5358	0.0306	99.9712	75.9491	-0.0127354
Cima2_cpx13	PHENO	verm	48.9634	2.3729	5.1408	0.0572	7.9407	0.1796	13.4846	21.601	0.7204	0.0204	100.481	75.1685	0.0331851
Cima2_cpx13	PHENO	verm	49.1375	1.6487	5.0317	0.0481	8.1128	0.1934	15.0658	20.2964	0.5323	0.0113	100.078	76.8	0.0301555
Cima2_cpx13	PHENO	verm	48.8033	2.0634	5.0992	0.1553	8.6496	0.1884	14.7812	19.9612	0.7488	0.0123	100.463	75.2858	0.0169232
Cima2_cpx13	PHENO	verm	50.8593	1.7823	3.4949	0.0097	8.2038	0.2042	13.9701	21.2283	0.4698	0.0091	100.232	75.2202	0.0397749
Cima2_cpx14	PHENO	NS	49.7722	2.0198	3.0549	0.0296	8.1581	0.1887	14.4246	21.8727	0.4482	0.0129	99.9817	75.9144	-0.0173761
Cima2_cpx14	PHENO	NS	52.04	0.1767	1.0329	0.013	11.1676	0.4153	13.5551	20.8618	0.5615	0.0065	99.8303	68.3914	-0.00348944
Cima2_cpx14	PHENO	NS	52.1819	0.2278	1.1605	0.0346	11.2017	0.4361	13.6308	20.6217	0.5516	0.0033	100.05	68.4458	0.00317829
Cima2_cpx14	PHENO	NS	52.0492	0.2775	1.332	0.0113	11.1261	0.4015	13.3384	21.0848	0.5992	0.0278	100.248	68.1229	0.00268759
Cima2_cpx14	PHENO	NS	52.1961	0.2954	1.4707	0.0245	11.1572	0.4061	13.4279	20.7938	0.6016	0.0078	100.381	68.2074	0.0110164
Cima2_cpx14	PHENO	NS	52.1228	0.1942	1.249	0.0141	11.1374	0.4079	13.6396	20.8423	0.537	0.0101	100.154	68.5839	0.00198617
Cima2_cpx14	PHENO	NS	52.0965	0.2028	1.1509	0.0117	11.0143	0.4149	13.6188	20.716	0.5558	0.0244	99.8061	68.7901	0.00330661
Cima2_cpx14	PHENO	NS	51.719	0.3725	1.7725	0.029	11.186	0.409	13.3864	20.269	0.647	0.0203	99.8106	68.0842	0.0170709
Cima2_cpx14	PHENO	NS	48.1838	2.0202	4.6514	0.1467	7.9266	0.1816	14.0309	21.6168	0.4766	0.0065	99.2411	75.9348	0.00519228
Cima2_cpx14	PHENO	NS	46.6691	2.9026	5.4686	0.0607	8.3374	0.1744	13.1011	21.8235	0.5147	0.0188	99.0709	73.6919	-0.00231667
Cima2_cpx15	PHENO	verm	45.7903	2.864	7.0797	0.3047	7.9869	0.1393	13.2779	21.8412	0.5248	0.0127	99.8214	74.7697	0.0141287
Cima2_cpx15	PHENO	verm	46.7782	3.0672	5.9836	0.0454	8.2887	0.1645	12.9455	22.146	0.4998	0.0074	99.9263	73.5736	0.00846579
Cima2_cpx15	PHENO	verm	46.7661	2.9452	6.2767	0.068	8.1564	0.1506	12.851	21.7562	0.5366	0.0048	99.5117	73.7437	0.0276209
Cima2_cpx15	PHENO	verm	47.0878	2.8881	5.7445	0.022	8.2882	0.1692	13.179	22.0026	0.5459	0.003	99.9303	73.9209	0.00660742
Cima2_cpx15	PHENO	verm	47.3069	2.34	6.7563	0.3571	7.5322	0.1682	13.6372	21.2802	0.5538	0.0037	99.9357	76.3449	0.0485996
Cima2_cpx15	PHENO	verm	48.2531	1.9491	5.4988	0.4722	7.5045	0.1571	14.0854	21.4802	0.6125	0.0251	100.038	76.9893	0.0242773
Cima2_cpx15	PHENO	verm	46.3494	3.1046	5.8994	0.1078	8.4067	0.1786	12.9597	21.7497	0.5378	0.0098	99.3035	73.3193	0.0012852
Cima2_cpx16	MICRO	verm	46.671	2.4471	6.2096	0.2269	7.8811	0.1574	13.3808	21.6872	0.5063	0.0294	99.1968	75.1648	0.0204935
Cima2_cpx16	MICRO	verm	46.0749	3.3161	6.5537	0.0199	8.3935	0.1553	12.8451	21.8022	0.5816	-0.0069	99.7354	73.1761	0.0103352
Cima2_cpx16	MICRO	verm	47.077	2.8292	5.7379	0.011	8.2324	0.171	13.2202	21.8455	0.5172	0.0199	99.6611	74.1109	0.0108427
Cima2_cpx16	MICRO	verm	48.4402	2.4804	4.2758	0.0625	8.1403	0.1578	13.7534	21.9333	0.5477	0.014	99.8054	75.0734	-0.00764338
Cima2_cpx17	MICRO	verm	52.0207	0.8485	0.9099	0.0015	8.1559	0.2122	14.9314	21.7379	0.6686	0.0004	99.4868	76.545	-0.0249349
Cima2_cpx17	MICRO	verm	54.1703	0.673	4.8614	0.0013	7.4219	0.1803	12.6968	18.6328	1.0269	0.002	99.6667	75.3057	0.22738
Cima2_cpx18	PHENO	verm	47.2259	2.8205	5.1344	0.0406	8.4384	0.1871	13.3009	22.1172	0.5438	-0.0114	99.7973	73.7518	-0.011563
Cima2_cpx18	PHENO	verm	50.269	0.6673	3.5178	0.0335	12.5764	0.4331	13.2614	18.3439	0.8738	0.0125	99.9887	65.274	0.0363531
Cima2_cpx18	PHENO	NS	50.2658	0.7467	3.5852	0.0456	12.4304	0.4268	13.1053	18.695	0.9189	0.0086	100.228	65.2703	0.034595
Cima2_cpx18	PHENO	NS	50.2736	0.6622	3.3499	0.0245	12.45	0.429	13.1083	18.4768	0.8823	0.0022	99.6589	65.2398	0.0365876
Cima2_cpx18	PHENO	NS	49.3555	0.7247	3.8746	0.0228	12.5399	0.4359	12.6758	18.3795	0.9195	0.0004	98.9285	64.3101	0.0417092
Cima2_cpx18	PHENO	NS	49.5132	1.5839	3.8988	0.0357	10.8801	0.3387	12.798	20.2454	0.6988	-0.0119	99.9807	67.7088	0.0270191
Cima2_cpx18	PHENO	NS	49.868	0.8083	4.011	0.0187	12.4717	0.4189	12.9289	18.5145	0.9199	-0.0033	99.9566	64.8869	0.0443447
Cima2_cpx18	PHENO	verm	50.6595	0.6024	3.0131	0.024	12.1246	0.3932	13.4486	18.9221	0.7957	0.0047	99.988	66.412	0.0272915
Cima2_cpx18	PHENO	verm	49.0911	1.3084	3.8748	0.0434	10.3515	0.2959	13.3792	20.0248	0.8336	0.0228	99.2254	69.7335	0.0143057
Cima2_cpx19	PHENO	NS	49.2	1.7577	4.9912	0.1383	7.9018	0.1573	14.1177	20.9152	0.5571	0.0241	99.7604	76.1043	0.0445058
Cima2_cpx19	PHENO	NS	48.4402	1.8743	4.4347	-0.0031	7.7654	0.2162	14.1854	21.7102	0.5154	-0.0127	99.126	76.5057	0.00421765
Cima2_cpx19	PHENO	NS	47.5011	2.2916	5.5332	0.0023	8.327	0.1899	13.5238	21.7462	0.5031	-0.0033	99.6149	74.3267	0.0145197
Cima2_cpx19	PHENO	NS	49.9838	1.4069	3.6483	0.0088	8.7057	0.2868	13.5181	22.0672	0.6371	-0.0107	100.252	73.4607	0.0134069
Cima2_cpx19	PHENO	NS	48.9541	1.7288	4.3353	0.1278	7.51	0.1577	14.8707	21.4887	0.423	0.0186	99.6148	77.9237	0.00469977
Cima2_cpx19	PHENO	NS	48.4133	2.0301	5.076	0.1187	7.4347	0.164	14.4067	21.8592	0.4338	0.0158	99.9522	77.5495	0.0129671
Cima2_cpx19	PHENO	NS	42.0952	5.6377	5.1787	0.043	15.7009	0.2713	11.9501	18.4465	0.5822	0.016	99.9215	57.5687	-0.155226
Cima2_cpx19	PHENO	NS	47.8499	2.1077	5.6783	0.0069	8.1611	0.2219	13.2168	22.0508	0.6083	0.0013	99.903	74.2725	0.0274464
Cima2_cpx19	PHENO	NS	47.3831	2.4567	5.8497	0.0096	7.3142	0.1749	13.5836	22.2575	0.5056	0.0011	99.536	76.8011	0.0208167
Cima2_cpx20	PHENO	verm	47.6213	2.5167	5.1445	0.1831	8.3688	0.1686	13.686	21.4011	0.5543	0.0119	99.6564	74.4584	0.0024591
Cima2_cpx20	PHENO	verm	51.2156	0.4158	2.9456	0.1895	10.4386	0.2686	14.2794	19.7318	0.7298	0.0244	100.239	70.9174	0.027085
Cima2_cpx20	PHENO	verm	51.3562	0.4359	2.7828	0.1398	10.2909	0.2501	14.3224	19.881	0.6832	0.0261	100.168	71.2721	0.0266107
Cima2_cpx20	PHENO	verm	52.0222	0.7018	2.0215	0.1362	10.0917	0.2804	15.6172	18.6906	0.5987	0.0337	100.194	73.3945	0.0118975
Cima2_cpx20	PHENO	verm	52.326	1.0824	12.8935	0.0198	5.2199	0.1299	7.3507	11.9001	8.1069	0.0066	99.0358	71.5121	0.419728
Cima2_cpx21	PHENO	verm	48.2319	2.0393	4.8313	0.062	8.0019	0.1715	14.0149	21.5964	0.4722	0.0108	99.4322	75.7406	0.0109371
Cima2_cpx21	PHENO	verm	48.3231	2.0094	5.4815	0.1984	8.1211	0.1937	14.4093	20.6861	0.5477	0.0001	99.9704	75.9781	0.027686
Cima2_cpx21	PHENO	verm	46.3999	3.0166	6.1259	0.1906	8.2972	0.1558	12.8075	21.8882	0.5023	0.0128	99.3966	73.3447	0.0119995
Cima2_cpx21	PHENO	verm	47.4506	2.5935	4.6898	0.0594	8.3476	0.1685	13.4289	21.8589	0.5263	0.0011	99.1245	74.1447	-0.0105738
Cima2_cpx21	PHENO	verm	46.028	3.1456	6.4913	0.0991	8.4066	0.1557	12.79	21.885	0.6113	0.0146	99.6272	73.0609	0.007621
Cima2_cpx21	PHENO	verm	46.9299	2.5868	5.905	0.1145	8.0355	0.1733	13.1445	21.7673	0.5104	0.0147	99.182	74.4636	0.0207598
Cima2_cpx21	PHENO	verm	50.0309	1.7997	2.3133	0.0131	8.7743	0.2424	14.1399	21.5499	0.495	-0.0107	99.3476	74.1781	-0.0230527
Cima2_cpx22	PHENO	verm	48.766	2.3293	5.5099	0.1141	7.8278	0.1743	12.9159	21.4028	0.8959	0.0137	99.9498	74.6276	0.0531246
Cima2_cpx22	PHENO	verm	48.8063	1.7408	5.9014	0.0968	8.0416	0.1827	14.4827	19.8563	0.6002	0.0191	99.7279	76.2493	0.064775
Cima2_cpx22	PHENO	verm	47.4359	2.5199	5.7588	0.3262	7.9503	0.1516	13.4454	21.9649	0.5346	0.0004	100.088	75.0915	0.0133671
Cima2_cpx22	PHENO	verm	48.3959	2.3233	4.7486	0.138	8.026	0.1694	13.8232	21.92	0.5693	0.0004	100.114	75.431	0.0023746
Cima2_cpx23	PHENO		50.1074	1.8283	3.0206	0.0219	7.9446	0.1978	14.4952	21.8638	0.4202	0.0112	99.9111	76.4839	-0.00672297
Cima2_cpx23	PHENO		47.5287	2.4494	4.8392	0.0671	8.2005	0.1738	13.4742	21.9414	0.5182	0.0107	99.2031	74.548	-0.00444075
Cima2_cpx23	PHENO		47.9565	2.5067	5.06	0.1231	7.865	0.1612	13.7734	21.8163	0.5042	0.0191	99.7856	75.7383	0.00673821
Cima2_cpx23	PHENO		47.1412	2.8481	5.1066	0.0365	8.4729	0.1704	13.1656	21.8214	0.5606	0.0272	99.3505	73.474	-0.00588424
Cima2_cpx23	PHENO		46.7833	2.9434	5.3655	0.0304	8.3481	0.1901	12.9917	21.8166	0.563	0.0117	99.0439	73.504	-0.00137334
Cima2_cpx23	PHENO		47.6441	2.702	4.958	0.0219	8.4705	0.1765	13.3241	21.7029	0.5508	0.017	99.5679	73.712	0.000928261
Cima2_cpx23	PHENO		47.1117	2.6955	4.8344	0.0518	8.1467	0.1773	13.3518	21.9891	0.5231	0.012	98.8933	74.4998	-0.0125957
Cima2_cpx23	PHENO		49.4838	1.9382	3.2237	0.0349	7.8512	0.1908	14.315	21.9079	0.4674	0.0181	99.4309	76.4716	-0.0117031
Cima2_cpx23	PHENO		49.2474	2.0807	3.1773	0.024	8.067	0.1937	13.9514	22.0675	0.4792	0.0117	99.3002	75.5076	-0.0158284
Cima2_cpx25	PHENO	verm	48.2833	2.5987	4.5301	0.0325	8.1515	0.1792	13.554	21.9814	0.5379	0.0297	99.8785	74.7731	-0.00203563
Cima2_cpx25	PHENO	verm	49.0667	2.1945	3.8005	0.175	8.0218	0.1762	13.9551	21.9466	0.5503	0.0272	99.9141	75.6162	-0.00864721
Cima2_cpx25	PHENO	verm	50.5274	1.2353	4.0472	0.3689	7.831	0.2124	16.7403	18.6002	0.5056	0.0126	100.081	79.2128	0.0277244
Cima2_cpx25	PHENO	verm	48.0711	2.7018	4.913	0.187	8.3945	0.1918	13.3868	21.8185	0.6588	-0.0019	100.321	73.9768	-0.00109152
Cima2_cpx25	PHENO	verm	48.3731	2.4852	4.2859	0.0534	8.0198	0.17	13.8468	22.0099	0.5604	0.006	99.8105	75.4769	-0.0113503
Cima2_cpx26	PHENO	verm	47.5905	2.9275	4.8884	0.0533	8.1674	0.164	13.247	21.897	0.5483	-0.0045	99.4787	74.3013	-0.00163029
Cima2_cpx26	PHENO	verm	46.2405	2.8104	6.1201	0.2101	7.9804	0.172	13.3645	21.7124	0.4975	0.0178	99.1255	74.9075	0.0042567
Cima2_cpx26	PHENO	verm	48.4818	2.1419	4.4355	0.0603	8.4179	0.2005	13.8541	21.6095	0.484	0.0285	99.7139	74.5791	0.00206635
Cima2_cpx26	PHENO	verm	49.2926	1.6488	3.7094	0.0716	7.9472	0.1865	14.4503	21.6808	0.4318	0.0398	99.4588	76.4222	-0.000820099
Cima2_cpx26	PHENO	verm	47.8841	2.4229	5.1429	0.0671	8.267	0.1851	13.5911	21.8676	0.5122	0.0036	99.9435	74.5587	0.0065647
Cima2_cpx26	PHENO	verm	48.0516	1.8819	5.0307	0.0783	8.0321	0.1747	13.6931	21.8292	0.5092	0.0203	99.301	75.2412	0.0162945
Cima2_cpx26	PHENO	verm	48.6057	2.3146	3.8816	0.0304	8.0397	0.1861	13.9482	22.0306	0.4788	0.0149	99.5306	75.566	-0.0143085
Cima2_cpx26	PHENO	verm	49.0201	2.1492	3.6392	0.0442	7.9891	0.1803	14.089	22.0297	0.5009	-0.0047	99.637	75.8667	-0.0132464
Cima2_cpx27	PHENO	verm	46.7976	1.9744	7.7076	0.6112	7.0097	0.144	13.9618	20.6017	0.7633	0.0306	99.602	78.0246	0.0665099
Cima2_cpx27	PHENO	verm	46.9306	2.8036	6.5691	0.2936	7.8962	0.1867	12.8559	21.4294	0.6284	0.0222	99.6158	74.3738	0.0421658
Cima2_cpx27	PHENO	verm	47.9796	2.0874	5.3258	0.2859	7.6649	0.1642	13.8059	21.6876	0.4971	0.0087	99.5071	76.2514	0.0216329
Cima2_cpx27	PHENO	verm	47.4393	2.3507	5.5251	0.2127	8.1118	0.1731	13.889	21.3254	0.5552	0.0012	99.5835	75.3218	0.00924752
Cima2_cpx27	PHENO	verm	48.7268	2.2182	4.3217	0.2931	8.0279	0.1864	13.9324	21.9886	0.5032	0.005	100.203	75.5721	-0.00409551
Cima2_cpx27	PHENO	verm	47.3476	2.6791	5.2862	0.2368	8.1366	0.1596	13.3929	22.1931	0.5825	0.0174	100.032	74.5816	-0.00755424
Cima2_cpx27	PHENO	verm	48.6179	2.0629	4.5644	0.1979	7.9162	0.1789	14.0191	21.8869	0.5284	0.0014	99.974	75.9434	0.00341204
Cima2_cpx27	PHENO	verm	47.1427	2.434	5.5565	0.3404	8.2498	0.1882	13.3731	21.8075	0.5102	0.0157	99.618	74.2906	0.00503192
Cima2_cpx27	PHENO	verm	45.6621	3.2041	6.5702	0.3738	8.4366	0.1624	12.5635	21.9296	0.5688	0.0115	99.4825	72.6371	0.00401768
Cima2_cpx27	PHENO	verm	47.4714	2.1686	6.0249	0.5173	7.6331	0.1588	13.6896	20.9751	0.6678	0.0132	99.3199	76.1734	0.0350465
Cima2_cpx28	MICRO	NS	47.8355	2.4355	4.6269	0.0425	8.1942	0.1756	13.6138	21.9	0.5342	0.0132	99.3713	74.7576	-0.00640196
Cima2_cpx28	MICRO	NS	48.6003	1.6005	7.9939	0.7639	7.2509	0.1362	13.5701	17.8628	2.0483	0.0286	99.8554	76.938	0.12513
Cima2_cpx28	MICRO	NS	49.5579	1.0096	5.3843	0.9926	6.1261	0.1397	16.2985	19.2098	0.6135	0.0327	99.3646	82.5863	0.0564799
Cima2_cpx28	MICRO	NS	49.4313	1.043	5.4986	0.9377	6.2049	0.1488	16.2657	19.3123	0.6492	0.0487	99.5403	82.3725	0.0529279
Cima2_cpx28	MICRO	NS	48.9359	1.3376	6.3251	0.7223	6.4928	0.1441	15.3966	19.9472	0.6908	0.0222	100.015	80.869	0.0665781
Cima2_cpx28	MICRO	NS	47.8688	1.4801	6.8342	0.602	6.5577	0.1336	14.6891	20.4402	0.7446	0.0377	99.3881	79.9718	0.0650367
Cima2_cpx28	MICRO	NS	48.0523	1.6161	6.6699	0.475	6.9312	0.1483	14.6438	20.1067	0.7267	0.0268	99.3969	79.0187	0.0675363
Cima2_cpx28	MICRO	NS	47.4761	1.6329	7.3564	0.685	6.7629	0.1608	14.369	20.3529	0.7442	0.0017	99.5418	79.112	0.0733228
Cima2_cpx28	MICRO	NS	47.902	2.1826	4.7537	0.1516	7.6569	0.1585	14.1803	21.8136	0.4731	0.0191	99.2912	76.7512	-0.00376219
Cima2_cpx28	MICRO	NS	47.5829	2.5248	4.6749	0.0321	8.3556	0.1796	13.6334	21.7662	0.5093	-0.0003	99.2584	74.4152	-0.0105671
Cima2_cpx29	PHENO	SZ/OZ	49.8899	1.9054	2.9412	0.0038	8.0713	0.189	14.2263	22.0601	0.4806	0.0229	99.7904	75.8569	-0.0138978
Cima2_cpx29	PHENO	SZ/OZ	48.5824	2.0158	4.5345	0.0257	8.0892	0.1896	14.3926	21.6232	0.4319	0.0032	99.888	76.0287	0.000644895
Cima2_cpx29	PHENO	SZ/OZ	43.0281	3.8017	9.2458	0.1062	8.7792	0.1441	11.6388	21.6957	0.5913	0.0087	99.0396	70.2667	0.0342176
Cima2_cpx29	PHENO	SZ/OZ	48.67	2.3701	5.5927	0.1142	7.9093	0.1635	12.972	21.151	0.5403	0.0181	99.5013	74.5134	0.0676366
Cima2_cpx29	PHENO	SZ/OZ	44.4442	2.8251	8.7282	0.1117	8.6134	0.1532	12.3286	21.5407	0.5794	0.001	99.3256	71.8427	0.0495744
Cima2_cpx29	PHENO	SZ/OZ	45.0173	3.0006	8.3399	0.0528	8.3874	0.1445	12.3084	21.7954	0.5908	0.0073	99.6444	72.3446	0.0486486
Cima2_cpx29	PHENO	SZ/OZ	45.2455	2.6186	7.8482	0.1575	8.0638	0.1352	12.6185	21.8911	0.5568	0.0029	99.138	73.611	0.041941
Cima2_cpx29	PHENO	SZ/OZ	45.9393	2.7552	7.0452	0.073	8.1845	0.1513	12.9674	21.74	0.528	0.016	99.3998	73.8515	0.0284219
Cima2_cpx29	PHENO	SZ/OZ	48.4047	2.6096	4.1848	0.0192	8.4695	0.2075	13.256	21.8952	0.6157	-0.0062	99.6559	73.6149	-0.0048804
Cima2_cpx30	MICRO	verm	49.4829	2.092	3.4203	0.0409	7.9777	0.18	14.2322	21.9451	0.4855	0.025	99.8815	76.0774	-0.0105818
Cima2_cpx30	MICRO	verm	48.1388	2.369	4.771	0.0364	8.0742	0.1738	13.7479	21.8958	0.5004	0.0037	99.711	75.2182	0.00303441
Cima2_cpx30	MICRO	verm	48.0927	2.1617	5.2333	0.0255	8.2	0.1822	14.0867	21.5132	0.4255	-0.0025	99.9184	75.3834	0.0141642
Cima2_cpx30	MICRO	verm	45.4184	2.7915	8.0977	0.0276	8.4806	0.1457	12.3961	21.7378	0.5761	0.0139	99.6855	72.2655	0.0517322
Cima2_cpx30	MICRO	verm	48.5505	2.5152	5.0426	0.0248	8.4614	0.1916	12.8594	21.9385	0.7465	-0.0088	100.322	73.0396	0.0238877
Cima2_cpx30	MICRO	verm	44.2729	3.6263	8.7383	0.0078	8.64	0.1549	11.6914	22.0745	0.6439	0.0104	99.8606	70.693	0.0410346
Cima2_cpx30	MICRO	verm	46.6708	2.6663	6.47	0.0911	7.6584	0.173	13.3969	21.9885	0.5976	-0.0005	99.7121	75.7182	0.0190657
Cima2_cpx30	MICRO	verm	47.0226	3.1811	5.1511	0.0255	8.4408	0.1861	12.908	21.944	0.5999	0.0026	99.4616	73.1617	-0.00766049
Cima2_cpx31	PHENO	verm	46.253	3.1166	6.608	0.4581	8.457	0.1661	12.691	21.6384	0.6108	0.0259	100.025	72.7895	0.0160511
Cima2_cpx31	PHENO	verm	47.4914	2.3268	6.7958	0.2977	7.605	0.1698	13.2283	20.9072	0.7182	-0.0033	99.5368	75.6138	0.0662164
Cima2_cpx31	PHENO	verm	47.6102	2.7243	4.9038	0.0313	8.6735	0.1982	13.1854	21.3233	0.6022	0.0128	99.265	73.045	0.00489768
Cima2_cpx31	PHENO	verm	47.5252	2.5244	5.2761	0.3531	8.0177	0.1698	13.3521	21.8365	0.5437	0.0175	99.6161	74.8022	0.00727587
Cima2_cpx31	PHENO	verm	49.7609	1.9661	6.3982	0.1851	7.7962	0.1674	11.3982	20.0741	0.8446	-0.0086	98.5822	72.2699	0.169438
Cima2_cpx31	PHENO	verm	48.4162	2.394	4.8041	0.0774	8.0239	0.1812	13.6904	21.783	0.5163	0.006	99.8926	75.2565	0.0118862
Cima2_cpx32	PHENO	SZ/OZ	47.1706	2.9515	5.3641	0.0368	8.4142	0.1894	13.1496	21.6812	0.5368	0.0275	99.5218	73.5856	0.00359996
Cima2_cpx32	PHENO	SZ/OZ	49.0878	1.8217	4.3118	0.0687	7.7785	0.1768	14.5391	21.5951	0.4124	0.0076	99.7994	76.9155	0.00936123
Cima2_cpx32	PHENO	SZ/OZ	48.832	1.7468	4.0611	0.1199	7.6681	0.1792	14.7829	21.437	0.4177	0.0209	99.2658	77.46	-0.00289126
Cima2_cpx32	PHENO	SZ/OZ	48.7687	1.9046	4.2798	0.076	8.189	0.1819	14.7201	21.1979	0.4212	0.0055	99.7446	76.2148	-0.00235187
Cima2_cpx32	PHENO	SZ/OZ	46.9179	2.4936	6.091	0.098	8.2354	0.1737	13.5264	21.4079	0.4755	0.0136	99.4331	74.5408	0.020763
Cima2_cpx32	PHENO	SZ/OZ	47.2024	2.5647	5.8845	0.0792	7.7241	0.146	13.5918	21.8021	0.4808	0.0196	99.4953	75.8265	0.019219
Cima2_cpx32	PHENO	SZ/OZ	46.7024	2.873	5.8347	0.0909	7.9501	0.1593	13.2619	21.9397	0.5235	0.0085	99.3441	74.834	0.00570044
Cima2_cpx32	PHENO	SZ/OZ	40.3921	0.9371	2.7004	0.0422	21.8738	0.4369	23.6135	8.1856	0.291	0.0338	98.5065	65.8046	-0.378873
Cima2_cpx32	PHENO	SZ/OZ	46.6603	3.2594	5.7628	0.0234	8.5945	0.1793	12.6841	21.6204	0.5914	0.0223	99.398	72.458	0.0084621
Cima2_cpx33	MICRO	verm	47.7233	2.249	5.5678	0.3244	7.606	0.1519	14.0579	21.7851	0.475	0.0271	99.9676	76.7155	0.011926
Cima2_cpx33	MICRO	verm	47.6657	2.4626	5.1407	0.3897	8.152	0.1731	13.2061	21.6039	0.5254	0.0161	99.3352	74.2783	0.0145309
Cima2_cpx33	MICRO	verm	47.8728	2.2223	5.9115	0.4773	7.5929	0.1452	13.5258	21.3393	0.6192	0.0073	99.7138	76.0506	0.0396658
Cima2_cpx33	MICRO	verm	47.3401	2.3137	5.5597	0.4217	8.3113	0.1809	13.1671	21.9644	0.5219	0.0131	99.7941	73.8498	0.0106514
Cima2_cpx33	MICRO	verm	48.5354	2.0398	4.3982	0.3474	7.731	0.1709	13.9386	22.1154	0.5677	0.0044	99.849	76.2692	-0.00434663
Cima2_cpx33	MICRO	verm	49.1137	1.779	4.9922	0.4937	7.4438	0.1453	15.2437	20.2654	0.5905	0.0229	100.09	78.4968	0.0251439
Cima2_cpx33	MICRO	verm	48.7775	2.3447	3.9247	0.0327	8.0464	0.1737	13.8687	21.9065	0.4647	0.018	99.5577	75.4448	-0.00538269
Cima2_cpx34	MICRO	NS	49.6081	2.0126	3.1376	0.0356	8.2948	0.2085	14.3909	21.3711	0.4236	-0.0007	99.482	75.5661	-0.00911207
Cima2_cpx34	MICRO	NS	49.8231	1.8797	3.2366	0.0339	7.8772	0.1984	14.4294	21.7202	0.4623	0.0063	99.6671	76.5552	-0.00383986
Cima2_cpx34	MICRO	NS	49.7289	1.8963	3.3103	0.0376	7.8792	0.1834	14.4427	21.9917	0.4276	0.0207	99.9183	76.5672	-0.00883866
Cima2_cpx34	MICRO	NS	49.9859	1.9144	3.4101	0.0534	7.8809	0.1955	14.4979	21.9126	0.4562	0.0006	100.307	76.6317	-0.00320665
Cima2_cpx34	MICRO	NS	47.371	2.472	5.2251	0.1653	7.7731	0.1528	13.5665	22.1098	0.5019	0.0113	99.3488	75.6761	0.000982435
Cima2_cpx34	MICRO	NS	47.3974	2.3722	6.1657	0.264	7.6217	0.1536	13.7643	21.5641	0.4907	0.0048	99.7985	76.2991	0.0302037
Cima2_cpx34	MICRO	NS	48.7454	1.901	4.2598	0.1407	8.0593	0.1655	14.7545	21.2158	0.465	0.0206	99.7275	76.5449	-0.0048988
Cima2_cpx34	MICRO	NS	46.5954	2.4357	7.4268	0.1066	8.2904	0.1846	11.652	20.4433	1.6849	-0.0027	98.8169	71.4726	0.0737516
Cima2_cpx34	MICRO	NS	47.785	2.6774	4.7799	0.0364	8.2245	0.1894	13.4258	21.9499	0.5216	-0.0036	99.5863	74.4241	-0.00303766
Cima2_cpx35	PHENO	verm	48.2507	2.2478	3.9352	0.0563	8.1875	0.1935	13.7414	21.794	0.4887	0.0137	98.9087	74.9486	-0.0115419
Cima2_cpx35	PHENO	verm	47.6368	2.5543	5.0577	0.1351	8.0499	0.1619	13.3914	22.0667	0.5383	-0.0016	99.5904	74.7821	0.00175512
Cima2_cpx35	PHENO	verm	47.4959	2.5318	5.0755	0.2011	8.2815	0.1597	13.3297	21.6888	0.5219	0.0113	99.2973	74.155	0.00494404
Cima2_cpx35	PHENO	verm	48.2463	2.3208	4.8044	0.2547	8.0667	0.1761	14.0305	21.9178	0.5468	0.0191	100.383	75.6126	-0.00676828
Cima2_cpx35	PHENO	verm	46.4418	2.6343	6.119	0.1292	7.978	0.157	13.1016	21.967	0.5323	0.0068	99.067	74.5379	0.0131636
Cima2_cpx35	PHENO	verm	47.2816	2.5205	5.7856	0.1514	8.0132	0.1767	13.2789	22.0111	0.5304	0.0104	99.7599	74.7091	0.0160135
Cima2_cpx35	PHENO	verm	48.2309	2.126	4.8551	0.1303	7.8149	0.1603	13.8867	21.6938	0.5055	0.0179	99.4215	76.0053	0.0126696
Cima2_cpx35	PHENO	verm	46.5402	2.5722	6.3561	0.1761	7.9426	0.1673	13.1484	21.6247	0.5578	0.0031	99.0885	74.6897	0.025541
Cima2_cpx36	PHENO	verm	50.0017	1.9154	3.5141	0.0447	7.8808	0.1821	14.4775	21.8228	0.5377	0.0143	100.391	76.6067	-0.0009925
Cima2_cpx36	PHENO	verm	49.692	2.1531	2.8153	-0.0124	8.8879	0.2405	14.1158	21.6578	0.4553	-0.0019	100.003	73.898	-0.0247748
Cima2_cpx36	PHENO	verm	49.5274	2.0116	3.2902	0.0211	7.9508	0.1946	14.1989	22.0316	0.4865	0.0015	99.7142	76.0962	-0.0114942
Cima2_cpx36	PHENO	verm	49.3666	2.0748	3.5409	0.0458	7.8223	0.1787	13.9611	22.0473	0.4987	0.0073	99.5434	76.0854	-0.00221377
Cima2_cpx36	PHENO	verm	48.0271	2.4889	4.5618	0.0457	8.2196	0.1796	13.5205	21.8918	0.5539	-0.0088	99.48	74.569	-0.0030913
Cima2_cpx36	PHENO	verm	49.5579	2.0275	3.3989	0.0462	7.8555	0.159	14.2529	22.0328	0.5001	0.0012	99.8319	76.3834	-0.00906144
Cima2_cpx36	PHENO	verm	49.6102	1.9471	3.3478	0.031	7.9847	0.1951	14.0986	21.7457	0.4654	0.0231	99.4487	75.8893	0.000420273
Cima2_cpx36	PHENO	verm	48.262	2.316	4.2698	0.0802	8.2185	0.1799	13.7909	21.8142	0.4966	0.0097	99.4379	74.9452	-0.00747306
Cima2_cpx36	PHENO	verm	49.245	2.2307	3.7131	0.0378	8.107	0.1833	13.9775	21.92	0.5032	0.0122	99.9297	75.4506	-0.00540658
Cima2_cpx37	PHENO	verm	48.3087	2.1573	5.2159	0.2053	7.7797	0.1718	13.4997	22.0581	0.4689	0.0365	99.9019	75.5695	0.0252616
Cima2_cpx37	PHENO	verm	47.3733	2.3778	5.4243	0.261	7.9588	0.1682	13.3692	21.813	0.4879	0.0272	99.2606	74.965	0.013888
Cima2_cpx37	PHENO	verm	49.8538	1.3969	4.0287	0.132	7.6287	0.1954	15.0874	21.2984	0.4433	0.0041	100.069	77.9028	0.0140538
Cima2_cpx37	PHENO	verm	47.0098	2.3835	6.0338	0.1913	7.9443	0.1732	13.2145	21.992	0.5038	0.0266	99.4727	74.7803	0.0217573
Cima2_cpx37	PHENO	verm	47.6605	2.4753	5.4955	0.1573	8.1218	0.173	13.6289	21.775	0.555	0.0216	100.064	74.9456	0.00954564
Cima2_cpx37	PHENO	verm	47.5821	2.8392	5.212	0.0387	8.3075	0.1762	13.2768	21.872	0.5366	0.001	99.842	74.0185	0.00440228
Cima2_cpx38	PHENO	verm	47.7002	1.999	6.0053	0.3645	8.8298	0.1701	14.0001	19.6582	0.5608	0.0209	99.3087	73.8657	0.0460191
Cima2_cpx38	PHENO	verm	48.4378	1.9369	6.7894	0.2052	7.6669	0.162	12.9253	21.1416	0.8223	0.026	100.113	75.0325	0.0888274
Cima2_cpx38	PHENO	verm	48.6677	1.7792	5.3404	0.2508	7.8173	0.1805	14.4458	21.3022	0.5261	0.0189	100.329	76.7123	0.0254547
Cima2_cpx38	PHENO	verm	46.1027	2.6045	6.8308	0.2426	8.001	0.1714	12.7707	21.9604	0.5135	0.0206	99.2183	73.994	0.0304978
Cima2_cpx38	PHENO	verm	48.7888	1.419	5.349	0.2101	6.9616	0.2115	16.9611	19.2162	0.5124	0.0099	99.6396	81.2842	0.01875
Cima2_cpx38	PHENO	verm	50.6071	0.9543	4.6763	0.2517	7.9301	0.2042	16.7422	18.0262	0.6395	0.0343	100.066	79.0068	0.0531713
Cima2_cpx38	PHENO	verm	49.2646	1.8147	4.9963	0.1723	7.9162	0.2019	14.6317	20.5359	0.5478	0.0227	100.104	76.7161	0.0370783
Cima2_cpx38	PHENO	verm	49.3866	2.0476	3.3041	0.0329	8.2719	0.1759	14.3941	21.6887	0.4669	0.0209	99.7895	75.6212	-0.0173782
Cima2_cpx39	PHENO	verm	47.1135	2.2852	6.3206	0.4318	8.6864	0.173	14.3243	20.2275	0.5805	0.0325	100.175	74.6166	0.0177234
Cima2_cpx39	PHENO	verm	48.8532	2.295	4.2186	0.128	8.0566	0.1802	13.9072	21.9657	0.5547	0.0094	100.168	75.4727	-0.00369544
Cima2_cpx39	PHENO	NS	51.0905	0.7485	4.3027	0.4708	6.4836	0.1709	17.1592	18.9191	0.6194	0.0331	99.9978	82.5106	0.0479371
Cima2_cpx39	PHENO	NS	47.3099	2.0573	6.4	0.7257	7.6718	0.1663	13.1996	21.8537	0.5612	0.0162	99.9618	75.4119	0.0376176
Cima2_cpx39	PHENO	NS	48.1259	1.3705	6.9628	0.702	6.3858	0.1357	14.8136	20.317	0.6934	0.0474	99.554	80.5266	0.0757261
Cima2_cpx39	PHENO	NS	47.7011	2.2455	5.322	0.5426	7.9739	0.1867	13.4315	21.8135	0.5466	0.0127	99.776	75.0166	0.0113047
Cima2_cpx39	PHENO	verm	48.9609	1.9554	4.7089	0.0246	8.5141	0.2202	13.9605	21.3794	0.5311	0.0317	100.287	74.5087	0.0181645
Cima2_cpx39	PHENO	verm	49.1925	2.1678	3.5682	0.0465	7.9984	0.1825	14.1399	22.1577	0.5177	-0.0093	99.9619	75.9114	-0.0164941
Cima2_cpx40	PHENO	NS	47.259	2.9656	5.3877	0.0425	8.485	0.167	13.1484	21.7614	0.5696	0.0158	99.8019	73.4206	0.00219577
Cima2_cpx40	PHENO	NS	52.0803	0.2511	1.3261	0.0054	15.1085	0.5585	13.1864	16.8581	0.5534	0.022	99.9498	60.8735	0.0297871
Cima2_cpx40	PHENO	NS	51.7999	0.2087	1.0964	0.0181	14.2807	0.5543	12.0772	19.7286	0.5815	0.006	100.351	60.1203	0.00528532
Cima2_cpx40	PHENO	NS	51.7434	0.23	1.327	0.0124	14.6915	0.5663	12.3191	18.9618	0.6174	0.014	100.483	59.9156	0.00975584
Cima2_cpx40	PHENO	verm	51.4933	0.2675	1.3455	0.0037	14.3166	0.5491	12.1305	19.4166	0.6249	-0.0007	100.147	60.1657	0.00733709
Cima2_cpx40	PHENO	verm	51.1948	0.326	1.6318	0.023	14.8121	0.5573	12.2007	18.7566	0.6161	0.0151	100.133	59.4866	0.0104503
Cima2_cpx40	PHENO	verm	48.5849	2.1993	4.2602	0.0624	7.8888	0.1533	13.9435	21.9618	0.4624	0.0179	99.5346	75.9079	-0.000314343
Cima2_cpx42	PHENO	verm	49.0817	2.154	3.8267	0.0223	8.2213	0.1559	14.0524	21.6821	0.5041	0.0188	99.7193	75.2899	-0.0034723
Cima2_cpx42	PHENO	verm	50.3595	1.7951	4.0448	0.0256	8.3309	0.2178	12.7182	21.0737	1.1691	-0.0013	99.7333	73.1281	0.053879
Cima2_cpx42	PHENO	verm	52.3202	0.7308	3.3567	0.0013	14.8222	0.5484	16.6435	10.4776	0.27	0.0198	99.1904	66.6848	0.118775
Cima2_cpx42	PHENO	verm	52.2522	0.3959	2.5186	-0.0058	17.9706	0.713	17.5703	7.0217	1.1644	0.017	99.618	63.5421	0.0635057
oxide wt %	pheno vs micro	Texture	SiO2	TiO2	Al2O3	Cr2O3	FeO	MnO	MgO	CaO	Na2O	NiO	sum	Mg#	Al VI
Cima3_cpx1	PHENO	NS	48.0271	2.6962	4.7659	0.1627	7.8274	0.1593	13.7779	21.9988	0.4994	0.0142	99.929	75.8323	-0.00453801
Cima3_cpx1	PHENO	NS	46.6217	3.6429	5.7166	0.0155	8.7114	0.1853	12.4796	22.0309	0.6658	0.0085	100.078	71.8601	-0.00541415
Cima3_cpx1	PHENO	VERM	46.579	2.6192	5.9903	0.7025	6.9782	0.1403	13.5196	21.9136	0.5098	0.0334	98.9857	77.5463	0.0102979
Cima3_cpx1	PHENO	NS	48.5574	2.6093	6.7247	0.2956	7.2774	0.1372	11.9966	20.1385	1.2687	-0.0035	99.0019	74.61	0.117457
Cima3_cpx2	MICRO	NS	46.8926	2.6132	6.0427	0.7844	7.0772	0.1415	13.4342	22.1751	0.4872	0.0055	99.6535	77.1887	0.0129126
Cima3_cpx2	MICRO	NS	47.5921	2.6844	4.7945	0.2434	7.5042	0.1562	13.5711	22.1805	0.4936	-0.0089	99.211	76.3244	-0.00531756
Cima3_cpx2	MICRO	NS	48.987	2.4013	3.1221	0.0257	8.2869	0.1809	13.9966	21.6758	0.4689	-0.0108	99.1342	75.0674	-0.0224629
Cima3_cpx3	PHENO	NS	46.3041	3.5856	5.5063	0.0153	8.5918	0.1746	12.602	21.7972	0.6428	0.011	99.2308	72.3345	-0.0111911
Cima3_cpx3	PHENO	VERM	47.2813	2.4445	5.4783	0.4848	7.1502	0.1382	13.7224	22.1968	0.5061	0.0151	99.4177	77.3811	0.00421589
Cima3_cpx3	PHENO	VERM	47.733	2.5373	4.9102	0.3604	7.6322	0.1617	13.7471	21.9171	0.5736	0.0183	99.5911	76.2516	-0.0046887
Cima3_cpx3	PHENO	NS	47.4421	2.8871	5.1542	0.1783	7.5259	0.1397	13.4374	22.0393	0.5313	0.0069	99.3421	76.0926	0.00285087
Cima3_cpx4	PHENO	VERM	45.8446	2.847	7.1455	0.0234	7.3752	0.1331	13.2203	21.9898	0.4576	0.0179	99.0545	76.1642	0.0316484
Cima3_cpx4	PHENO	VERM	48.2021	1.8283	5.9166	0.0225	6.5032	0.1277	14.9762	21.3327	0.5032	0.0259	99.4384	80.4119	0.0387169
Cima3_cpx4	PHENO	NS	44.1926	3.6796	7.9324	0.0426	7.5809	0.1489	12.6776	21.7832	0.4739	0.0008	98.5125	74.881	0.0217768
Cima3_cpx4	PHENO	NS	48.2154	1.4814	6.9906	0.6339	5.987	0.1383	15.2832	20.2693	0.7183	0.0309	99.7483	81.9836	0.0706519
Cima3_cpx4	PHENO	VERM	48.3455	2.2276	3.6036	0.0767	7.7776	0.1683	14.1239	22.0498	0.5293	0.0336	98.9359	76.3992	-0.0278056
Cima3_cpx5	MICRO	NS	45.0766	4.3046	5.915	0.0074	9.0134	0.1681	11.9329	21.7711	0.6757	0.0071	98.8719	70.238	-0.0238095
Cima3_cpx5	MICRO	NS	46.5308	2.6918	5.7108	0.5268	7.1713	0.1261	13.5138	22.1068	0.4926	0.0325	98.9032	77.0599	-0.00110432
Cima3_cpx5	MICRO	VERM	45.947	3.1262	6.2011	0.6259	7.8105	0.1529	12.7548	21.9268	0.5405	0.0058	99.0916	74.4313	0.00432998
Cima3_cpx5	MICRO	NS	47.833	2.4485	4.1478	0.1111	7.7905	0.163	13.6321	21.9292	0.4969	0.0049	98.5569	75.7237	-0.0114566
Cima3_cpx6	MICRO	VERM	49.2973	1.9311	2.8591	0.1626	7.4858	0.1798	14.5632	21.7658	0.4698	-0.0055	98.709	77.6183	-0.0230283
Cima3_cpx6	MICRO	VERM	51.159	1.4871	2.0231	0.1279	7.4474	0.1819	15.2248	21.8197	0.4346	0.0029	99.9085	78.4677	-0.0174818
Cima3_cpx6	MICRO	VERM	54.7216	0.9104	2.837	0.0126	7.2693	0.1741	13.5404	19.7771	0.8504	0.0142	100.107	76.854	0.15145
Cima3_cpx6	MICRO	VERM	47.5423	2.9973	4.9861	0.1025	8.1752	0.1714	13.6129	21.8083	0.6204	0.0097	100.026	74.8002	-0.0133978
Cima3_cpx7	MICRO	NS	45.948	2.4253	7.6102	0.6831	6.6158	0.1221	13.3773	21.5825	0.559	0.0062	98.9296	78.2819	0.0524187
Cima3_cpx7	MICRO	NS	47.4198	1.8535	7.7097	0.6417	5.9323	0.1195	14.395	20.7011	0.6561	0.0187	99.4475	81.2226	0.0861544
Cima3_cpx7	MICRO	NS	47.0931	2.5536	6.0999	0.6679	7.2822	0.1273	13.4189	21.9412	0.573	0.0166	99.7737	76.6616	0.0194032
Cima3_cpx7	MICRO	NS	46.6483	2.5931	6.7334	0.3842	6.9716	0.1315	13.544	21.9692	0.5108	0.0023	99.4883	77.5941	0.0317642
Cima3_cpx7	MICRO	NS	46.5436	2.4828	6.7394	0.6319	6.7778	0.109	13.4591	21.9344	0.507	0.0216	99.2067	77.9726	0.0342048
Cima3_cpx8	MICRO	OZ/SZ	49.0848	2.2685	3.1827	0.0217	8.2923	0.1996	14.1927	21.8466	0.468	0.0042	99.561	75.3148	-0.0267144
Cima3_cpx8	MICRO	NS	48.7465	1.7529	4.9719	0.2287	6.901	0.166	14.8196	21.5295	0.5075	0.0201	99.6438	79.2877	0.0198746
Cima3_cpx8	MICRO	VERM	48.3097	1.8462	5.0874	0.1206	8.0432	0.1921	14.8628	20.5941	0.5001	0.024	99.5802	76.7117	0.0140987
Cima3_cpx8	MICRO	NS	44.3362	3.321	8.3168	0.3126	7.6355	0.1367	12.4895	21.629	0.6152	0.012	98.8046	74.4625	0.0365757
Cima3_cpx9	PHENO	NS	48.0087	1.5537	7.4819	0.5217	6.0263	0.1003	14.9825	20.5509	0.6814	0.0169	99.9243	81.5901	0.0821706
Cima3_cpx9	PHENO	NS	47.316	1.759	8.1995	0.6334	6.0483	0.1187	14.347	20.4031	0.715	0.018	99.5581	80.8738	0.0995594
Cima3_cpx9	PHENO	NS	47.0489	2.4621	5.8048	0.5786	7.438	0.1552	13.5372	22.0073	0.5177	0.028	99.5777	76.4392	0.00900156
Cima3_cpx9	PHENO	NS	47.9889	2.4252	5.0775	0.4453	7.4417	0.1549	13.6995	21.9671	0.5326	0.0093	99.742	76.6442	0.0090241
Cima3_cpx10	PHENO	VERM	48.923	2.0792	3.9657	0.3472	7.0452	0.1278	14.6229	22.0495	0.4355	0.0302	99.6261	78.7231	-0.00929435
Cima3_cpx10	PHENO	VERM	48.4253	1.6859	4.8864	0.0051	7.773	0.174	14.5496	21.495	0.4015	0.004	99.3998	76.9409	0.0147558
Cima3_cpx10	PHENO	VERM	48.3185	2.169	5.1357	0.1806	7.587	0.1554	13.8744	21.7448	0.479	-0.0111	99.6331	76.525	0.0233904
Cima3_cpx11	PHENO	VERM	49.4104	2.2615	3.0757	0.008	8.3314	0.1948	13.7626	21.7347	0.4665	0.0044	99.25	74.6493	-0.00900861
Cima3_cpx11	PHENO	VERM	47.8544	2.6262	5.7055	0.5073	7.414	0.1388	13.4555	22.1309	0.5025	0.0179	100.353	76.3883	0.0215614
Cima3_cpx11	PHENO	VERM	46.7258	2.5226	6.3751	0.6279	6.9677	0.1335	13.5591	21.6699	0.534	0.0197	99.1351	77.6232	0.027371
Cima3_cpx11	PHENO	VERM	47.1955	2.4746	6.091	0.5212	7.0593	0.1285	13.5992	22.2962	0.4816	-0.0052	99.8418	77.4472	0.0192111
Cima3_cpx11	PHENO	VERM	48.9509	2.191	3.8483	0.2552	7.2694	0.1486	14.2353	22.1545	0.472	0.0083	99.5335	77.7321	-0.0076722
Cima3_cpx12	PHENO	NS	48.5364	1.57	6.9431	0.1056	6.3282	0.1244	14.8156	20.6584	0.6687	0.0129	99.7632	80.6704	0.0841892
Cima3_cpx12	PHENO	VERM	47.7248	2.0802	6.2985	0.106	6.9679	0.1355	14.2821	21.6435	0.4249	0.0156	99.679	78.5121	0.0420943
Cima3_cpx12	PHENO	NS	47.9947	1.6469	7.5825	0.6076	5.8963	0.1209	14.5229	20.8021	0.6857	0.0146	99.8742	81.4493	0.0909547
Cima3_cpx12	PHENO	NS	47.274	2.7529	4.9328	0.1707	7.8029	0.1491	13.3095	21.634	0.5213	0.0087	98.5559	75.2512	0.0043929
Cima3_cpx13	PHENO	VERM	47.5188	2.7371	5.029	0.1147	7.8605	0.1608	13.6544	21.9122	0.5224	0.0107	99.5206	75.5891	-0.00423781
Cima3_cpx13	PHENO	VERM	47.9258	2.6705	5.2801	0.1729	7.5497	0.1689	13.8816	21.7796	0.5038	0.0169	99.9497	76.6227	0.0105069
Cima3_cpx13	PHENO	VERM	48.2902	2.3062	5.6071	0.1493	7.2706	0.1294	13.9926	21.7504	0.6838	0.0155	100.195	77.4301	0.0259708
Cima3_cpx13	PHENO	VERM	46.9301	3.1366	6.2533	0.1201	7.8812	0.156	13.0661	21.6199	0.542	0.0092	99.7146	74.7177	0.0273337
Cima3_cpx13	PHENO	VERM	48.2332	2.4426	6.8843	0.1068	7.2032	0.1559	12.2956	21.1812	0.9864	0.0046	99.4939	75.2648	0.100786
Cima3_cpx14	PHENO	VERM	46.9279	3.14	5.3651	0.2351	7.8419	0.1481	13.2844	21.8777	0.5421	0.0171	99.3793	75.1229	-0.00462885
Cima3_cpx14	PHENO	VERM	47.1038	3.0451	5.5766	0.341	8.1004	0.1721	13.0515	22.0388	0.5731	0.0154	100.018	74.1745	0.000886861
Cima3_cpx14	PHENO	NS	46.5234	2.7401	7.6659	0.0211	6.8709	0.1243	14.7933	19.8685	0.6924	0.0091	99.3089	79.3303	0.0553565
Cima3_cpx14	PHENO	VERM	46.5117	2.7834	5.4823	0.6227	7.5995	0.1502	12.961	22.0354	0.5461	0.0354	98.7277	75.2489	-0.00135428
Cima3_cpx14	PHENO	VERM	48.721	2.3369	3.7081	0.2227	7.3968	0.1658	14.1829	22.0027	0.4487	-0.0022	99.1834	77.3654	-0.0134607
Cima3_cpx16	PHENO	VERM	47.7849	2.7987	4.8055	0.2069	7.6283	0.1538	13.5815	21.9658	0.5141	0.0074	99.447	76.0407	-0.00138354
Cima3_cpx16	PHENO	NS	46.6012	1.9418	8.1466	0.6804	5.9553	0.1071	14.0032	20.7305	0.7038	0.0132	98.8833	80.738	0.0877826
Cima3_cpx16	PHENO	NS	48.1945	1.5371	6.6953	0.6293	5.9188	0.1204	15.1606	20.5144	0.6607	0.0191	99.4502	82.0338	0.065451
Cima3_cpx16	PHENO	NS	48.6305	1.4805	6.4572	0.6743	5.8066	0.1127	15.0868	20.8282	0.6461	0.0212	99.7442	82.2429	0.0664396
Cima3_cpx16	PHENO	VERM	47.8722	1.7988	5.1583	0.5528	6.6856	0.1398	13.7633	22.1008	0.4399	0.0164	98.5279	78.5855	0.0267257
Cima3_cpx17	PHENO	VERM	47.3879	2.9855	5.2135	0.2673	7.7188	0.1341	13.4359	22.0773	0.5279	0.0027	99.7508	75.6271	-0.00301439
Cima3_cpx17	PHENO	VERM	48.2487	2.4091	4.3207	0.3519	7.5575	0.1531	13.9205	21.8396	0.5067	-0.0001	99.3077	76.6543	-0.00548844
Cima3_cpx17	PHENO	VERM	46.8066	2.9181	5.3484	0.4669	7.5379	0.1571	13.2464	22.027	0.5399	0.0173	99.0655	75.802	-0.00483083
Cima3_cpx17	PHENO	VERM	47.3454	2.6872	5.2957	0.2875	7.3594	0.1557	13.7495	22.0412	0.4808	0.0202	99.4225	76.9075	0.000518989
Cima3_cpx18	PHENO	VERM	48.9355	2.2774	3.2487	0.0212	8.2658	0.1924	13.9765	21.8147	0.4574	0.0177	99.2073	75.0882	-0.020912
Cima3_cpx18	PHENO	VERM	46.06	2.6193	6.758	0.417	7.2335	0.1589	13.3995	21.6533	0.5667	0.0229	98.889	76.7556	0.0242134
Cima3_cpx18	PHENO	VERM	46.7558	2.8028	5.3318	0.3882	7.4771	0.1631	13.4393	21.9868	0.5218	0	98.8667	76.2133	-0.0061915
Cima3_cpx18	PHENO	VERM	46.8391	2.9402	5.219	0.2325	7.7491	0.1443	13.3799	21.7869	0.5176	0.0209	98.8297	75.4776	-0.00522364
Cima3_cpx19	PHENO	VERM	48.7711	2.2034	4.4881	0.2951	6.8923	0.1498	14.3329	22.1272	0.4602	0.0063	99.7264	78.755	0.00636736
Cima3_cpx19	PHENO	NS	46.7964	1.9955	8.4844	0.6794	6.1487	0.1183	14.0209	20.4659	0.7291	0.0203	99.4589	80.2561	0.0981332
Cima3_cpx19	PHENO	NS	48.0327	1.84	7.7298	0.6669	6.097	0.1302	14.4467	20.7116	0.6821	0.0232	100.36	80.8569	0.0916343
Cima3_cpx19	PHENO	NS	47.2371	1.7094	7.6579	0.6707	5.9767	0.137	14.4512	20.5648	0.6915	0.0202	99.1165	81.1682	0.0823916
Cima3_cpx19	PHENO	NS	48.5479	1.5742	6.7284	0.6026	6.0286	0.1318	14.9635	20.6479	0.6513	0.0165	99.8927	81.5653	0.0735971
Cima3_cpx20	PHENO	VERM	48.7374	2.3646	3.7108	0.1619	7.8782	0.1723	14.3024	21.6081	0.4618	0	99.3976	76.3939	-0.016105
Cima3_cpx20	PHENO	VERM	44.3406	4.095	7.5643	0.0896	8.6977	0.1383	12.1573	21.653	0.6135	0.0016	99.3511	71.3602	0.00466402
Cima3_cpx20	PHENO	VERM	47.5917	2.0224	5.7844	0.4203	6.4943	0.1266	14.2999	21.5196	0.5135	0.0065	98.7792	79.6959	0.0314006
Cima3_cpx20	PHENO	VERM	47.7669	2.4804	4.2524	0.1562	7.558	0.1582	13.8187	22.0343	0.4811	0.0225	98.7287	76.5215	-0.0148077
Cima3_cpx21	PHENO	VERM	46.6432	2.22	7.4624	0.5178	6.8106	0.1301	13.6907	21.5999	0.5826	0.0092	99.6665	78.182	0.0538942
Cima3_cpx21	PHENO	VERM	46.6613	2.1079	8.9007	0.1488	6.4377	0.1283	13.7055	20.6744	0.721	0.0167	99.5024	79.1451	0.111152
Cima3_cpx21	PHENO	VERM	45.8048	2.9716	7.4596	0.3604	7.0712	0.1203	13.0075	22.1069	0.485	0.0112	99.3986	76.6305	0.038691
Cima3_cpx21	PHENO	VERM	45.8784	2.6254	7.9451	0.3571	7.1947	0.1308	13.3781	21.3647	0.6431	0.0264	99.5438	76.823	0.0521013
Cima3_cpx22	PHENO	VERM	50.0272	2.0811	2.6728	-0.0025	9.0719	0.2151	13.4352	21.8855	0.5165	0.0103	99.9132	72.5272	-0.0112533
Cima3_cpx22	PHENO	VERM	50.4058	0.8949	3.7372	0.3989	8.3674	0.2009	14.4545	21.2098	0.571	0.0243	100.265	75.4865	0.0239821
Cima3_cpx22	PHENO	VERM	50.106	0.8751	4.4766	0.4811	8.5238	0.1859	14.313	20.1186	0.6694	0.0108	99.7602	74.958	0.0539724
Cima3_cpx22	PHENO	VERM	50.257	0.8958	3.7099	0.1314	8.9316	0.2451	14.6557	20.5971	0.5044	0.0138	99.9418	74.5225	0.0242431
Cima3_cpx23	PHENO	VERM	48.7841	2.3415	3.5891	0.0382	8.0391	0.1631	14.1503	21.7659	0.4493	0.0067	99.3272	75.832	-0.0167449
Cima3_cpx23	PHENO	VERM	47.2525	2.2926	6.1034	0.6691	6.9567	0.1444	13.7534	21.5619	0.6018	0.0076	99.3434	77.8966	0.0283383
Cima3_cpx23	PHENO	VERM	47.9599	2.3856	4.5795	0.6453	7.3963	0.1768	13.8909	22.1216	0.4929	0.0072	99.656	77.0002	-0.0114652
Cima3_cpx23	PHENO	VERM	47.3753	2.6644	5.4106	0.2976	7.5357	0.1592	13.7499	21.6784	0.5052	0.0144	99.3907	76.4849	0.00745822
Cima3_cpx24	PHENO	NS	48.771	2.4002	3.9338	0.1143	7.7639	0.1629	14.0912	21.8974	0.496	0.0102	99.6408	76.3892	-0.00966336
Cima3_cpx24	PHENO	NS	47.0974	2.5146	6.8993	0.0018	8.2282	0.1787	13.3981	21.3842	0.6784	0.005	100.386	74.3762	0.0397436
Cima3_cpx24	PHENO	NS	46.063	2.4896	7.7759	0.1496	7.6211	0.1346	13.4015	21.365	0.6401	0.0112	99.6516	75.8141	0.0497256
Cima3_cpx24	PHENO	NS	46.9475	2.2572	7.5163	0.5138	6.7817	0.1523	13.7226	21.3301	0.6092	-0.0022	99.8285	78.2941	0.0639689
Cima3_cpx24	PHENO	NS	49.2937	2.254	3.5491	0.1435	7.6731	0.1678	14.4106	21.7039	0.4811	0.0059	99.6827	77	-0.00982857
Cima3_cpx25	MICRO	NS	45.1022	4.0572	6.1795	0.0629	8.6246	0.1675	12.1267	21.6861	0.6548	0.0146	98.6761	71.481	-0.0116546
Cima3_cpx25	MICRO	NS	46.9699	2.7772	5.6915	0.2416	7.6548	0.1529	13.3496	21.6272	0.5165	0.0083	98.9896	75.6617	0.0155045
Cima3_cpx25	MICRO	NS	47.527	2.6828	4.6821	0.1707	7.66	0.1449	13.5677	22.1282	0.4956	-0.0028	99.0561	75.9465	-0.00921599
Cima3_cpx26	PHENO	VERM	49.5458	2.0906	3.3396	0.1709	7.3895	0.1545	14.4677	22.0358	0.4778	0.0054	99.6776	77.7287	-0.0112951
Cima3_cpx26	PHENO	VERM	46.7936	2.8161	6.1899	0.7486	7.524	0.1537	13.0402	22.037	0.536	0.0279	99.8671	75.5471	0.0165023
Cima3_cpx26	PHENO	VERM	47.815	1.7179	7.6251	0.6764	5.8984	0.1277	14.3375	20.661	0.6859	0.0108	99.5557	81.2489	0.0947482
Cima3_cpx26	PHENO	VERM	47.4724	2.3747	5.4774	0.6765	7.1429	0.1497	13.9055	21.8896	0.5099	0.0165	99.6151	77.63	0.00672387
Cima3_cpx27	PHENO	VERM	49.3633	2.249	2.9599	0.028	8.47	0.1903	14.065	21.668	0.4582	0.0065	99.4584	74.7482	-0.0214813
Cima3_cpx27	PHENO	VERM	48.5415	2.1527	4.5134	0.3087	7.1259	0.1319	14.3247	21.9281	0.4864	0.0163	99.5295	78.1823	0.00295863
Cima3_cpx27	PHENO	VERM	47.6074	2.6671	5.7182	0.4231	7.7028	0.1502	12.9774	22.074	0.571	0.0046	99.8958	75.0203	0.0256075
Cima3_cpx27	PHENO	VERM	46.6716	3.0207	5.7303	0.3317	7.5782	0.1465	13.2171	21.8765	0.5158	0.018	99.1065	75.6633	0.00585861
Cima3_cpx28	PHENO	SZ/OZ	46.8338	3.2314	5.6225	0.1457	8.0165	0.1505	13.0907	21.994	0.5294	-0.0047	99.6099	74.4306	0.000408146
Cima3_cpx28	PHENO	NS	46.83	1.9974	8.2072	0.854	5.986	0.1094	14.307	20.9357	0.7063	0.0026	99.9356	80.9905	0.0762673
Cima3_cpx28	PHENO	VERM	48.0494	2.0972	6.0972	0.4435	6.1917	0.1303	14.6944	21.7409	0.5122	0.0161	99.9729	80.8815	0.0341204
Cima3_cpx28	PHENO	NS	47.8119	1.7121	7.4547	0.7103	5.6938	0.1139	14.5801	21.0047	0.6584	0.0179	99.7578	82.0295	0.0810816
Cima3_cpx28	PHENO	NS	48.0723	1.6771	7.287	0.5733	5.6805	0.1056	14.7673	20.9906	0.761	0.0245	99.9393	82.251	0.0763235
Cima3_cpx29	PHENO	SZ/OZ	49.7575	2.0454	3.1733	0.1222	7.4337	0.157	14.4678	21.9107	0.4586	0.0131	99.5393	77.6255	-0.00735877
Cima3_cpx29	PHENO	NS	47.084	1.8453	8.0538	0.4529	6.2745	0.1321	14.2161	20.7863	0.7255	0.0288	99.5994	80.1541	0.0853967
Cima3_cpx29	PHENO	NS	47.1104	2.4441	6.2012	0.3907	7.3249	0.1526	13.56	21.868	0.4741	0.0131	99.5391	76.744	0.0275548
Cima3_cpx29	PHENO	NS	46.7946	2.0938	8.7442	0.3726	6.4367	0.1239	13.7945	20.3667	0.7226	0.0092	99.4589	79.2543	0.111009
Cima3_cpx29	PHENO	SZ/OZ	48.838	2.2539	3.8396	0.1939	7.4701	0.1626	14.3471	21.8612	0.4556	0.0057	99.4279	77.3943	-0.00994604
Cima3_cpx30	PHENO	SZ/OZ	48.8717	2.1911	3.6837	0.2132	7.3667	0.1492	14.1893	22.0196	0.4706	0.0087	99.1637	77.4446	-0.00969642
Cima3_cpx30	PHENO	SZ/OZ	46.6718	2.0663	7.7265	0.4072	6.7931	0.1496	13.8126	21.0065	0.6445	0.0159	99.2939	78.3765	0.0702195
Cima3_cpx30	PHENO	SZ/OZ	47.3132	1.9516	7.3198	0.457	6.7228	0.1355	13.8646	21.0331	0.6667	0.0174	99.4816	78.6155	0.0725238
Cima3_cpx30	PHENO	SZ/OZ	48.2954	1.6809	6.3535	0.2238	7.3792	0.1897	14.2514	20.7009	0.7452	0.0256	99.8456	77.4912	0.058642
Cima3_cpx31	PHENO	SZ/OZ	49.3513	2.2826	3.0792	0.0189	8.3189	0.2022	14.1065	21.8613	0.4811	0.0062	99.7082	75.1415	-0.0229897
Cima3_cpx31	PHENO	NS	46.5021	1.9488	7.8902	0.7615	6.1315	0.1182	13.9553	20.7465	0.6539	0.0068	98.7146	80.2262	0.0791995
Cima3_cpx31	PHENO	VERM	47.8918	2.1836	5.7995	0.6261	6.8057	0.1305	14.1502	21.6588	0.5147	0.02	99.781	78.752	0.0280329
Cima3_cpx31	PHENO	NS	48.1805	1.6246	6.3501	0.5797	6.2028	0.1219	15.1303	20.5632	0.6486	0.0131	99.4148	81.3022	0.053276
Cima3_cpx31	PHENO	SZ/OZ	45.1394	4.3424	6.4891	0.0114	8.7767	0.1563	12.0146	21.5571	0.5991	0.009	99.0952	70.9322	-0.00170347
Cima3_cpx32	MICRO	VERM	46.1847	3.8363	5.2423	0.0108	9.0762	0.1891	12.4093	21.7658	0.6501	0.0018	99.3663	70.9068	-0.0247489
Cima3_cpx32	MICRO	VERM	48.1663	2.6478	4.7054	0.2481	7.4604	0.1499	13.804	22.1306	0.5188	0.0248	99.8561	76.7352	-0.00218094
Cima3_cpx32	MICRO	VERM	46.3755	3.1449	6.1606	0.264	7.6582	0.1436	13.0962	22.0101	0.5008	0.0274	99.3814	75.2988	0.00891455
Cima3_cpx32	MICRO	VERM	47.6836	2.7556	5.0282	0.2923	7.3608	0.1493	13.8015	22.2038	0.4948	0.0118	99.7817	76.9711	-0.00504442
Cima3_cpx33	PHENO	VERM	46.8123	3.2086	5.4231	0.1245	7.9021	0.166	13.0734	21.9036	0.5561	0.0174	99.187	74.6782	-0.00119197
Cima3_cpx33	PHENO	VERM	46.621	2.8606	5.7062	0.6113	7.6931	0.1543	13.0234	22.0884	0.557	0.0127	99.328	75.1101	0.00036009
Cima3_cpx33	PHENO	VERM	47.5891	2.6168	5.5188	0.3578	7.4428	0.1558	13.2036	22.013	0.5681	0.0085	99.4742	75.9751	0.0215497
Cima3_cpx33	PHENO	VERM	47.3535	2.8794	5.3086	0.3699	7.8376	0.1744	13.1461	21.8673	0.6276	0.0042	99.5684	74.9371	0.00470475
Cima3_cpx33	PHENO	VERM	49.4093	2.2753	2.9707	0.0094	8.5485	0.2063	13.6757	21.6891	0.5061	0.003	99.2932	74.0378	-0.013174
Cima3_cpx34	PHENO	NS	45.7967	3.897	5.9959	0.0248	8.5286	0.1786	12.3259	21.6189	0.6076	-0.0013	98.9728	72.038	-0.000729087
Cima3_cpx34	PHENO	NS	46.27	2.8257	5.9553	0.4002	7.4399	0.1497	13.2866	21.8058	0.5111	0.0137	98.658	76.0963	0.0068835
Cima3_cpx34	PHENO	NS	49.1024	2.2459	3.2602	0.0179	8.0942	0.1805	14.0591	21.9047	0.4991	0.0025	99.3664	75.5874	-0.0194396
Cima3_cpx35	MICRO	SZ/OZ	47.7689	2.674	4.9186	0.1718	7.7172	0.1637	13.6684	21.9172	0.5854	0.005	99.5901	75.9457	-0.00234937
Cima3_cpx35	MICRO	NS	46.6664	2.1676	8.7018	0.0454	8.4528	0.1501	13.562	18.9613	0.8942	0.0359	99.6373	74.0937	0.108015
Cima3_cpx35	MICRO	NS	46.2205	2.2782	8.7114	0.0372	8.6844	0.1531	13.3909	18.595	1.0478	0.0358	99.1542	73.3239	0.102111
Cima3_cpx35	MICRO	NS	46.2309	2.2042	8.601	0.0295	8.6868	0.1599	13.2208	18.7875	1.0221	0.0251	98.9676	73.0676	0.103088
Cima3_cpx35	MICRO	SZ/OZ	46.5146	2.2211	7.9784	0.1891	7.4372	0.1733	13.5789	20.7176	0.6431	0.0158	99.4691	76.4964	0.0757545
Cima3_cpx36	PHENO	VERM	47.2817	2.6741	7.0923	0.5714	6.9611	0.1433	14.2653	20.689	0.7104	0.0209	100.41	78.5087	0.0452641
Cima3_cpx37	PHENO	VERM	47.9278	2.6738	5.0927	0.0483	8.5498	0.1997	13.3162	21.6578	0.553	0.0029	100.022	73.5195	0.00882939
Cima3_cpx37	PHENO	VERM	48.0958	2.4728	4.8165	0.1584	7.3555	0.1435	13.7907	22.1803	0.494	0.0162	99.5237	76.97	0.00482177
Cima3_cpx37	PHENO	VERM	48.6539	2.1765	4.3676	0.3328	7.1907	0.1404	14.2288	21.9832	0.4571	0.0271	99.5581	77.9121	0.00243527
Cima3_cpx38	PHENO	VERM	47.2817	1.8916	7.0766	0.649	6.25	0.1268	14.2336	21.1728	0.6507	0.0053	99.3383	80.2357	0.0598632
Cima3_cpx38	PHENO	VERM	46.0983	2.9597	6.6217	0.6934	7.2933	0.1361	13.0502	22.1024	0.4812	0.0151	99.4514	76.1318	0.0162687
Cima3_cpx38	PHENO	VERM	48.3198	2.1455	4.9296	0.4872	6.935	0.1423	13.9642	21.7703	0.5354	-0.0034	99.2259	78.2107	0.0200523
Cima3_cpx38	PHENO	VERM	48.053	2.0764	4.7922	0.6187	6.8382	0.1432	14.1256	22.0416	0.4625	0.0159	99.1673	78.6429	0.00490034
Cima3_cpx38	PHENO	VERM	48.6782	2.302	4.5576	0.3267	7.113	0.1551	14.3309	22.1355	0.4695	-0.0058	100.063	78.2205	0.000568055
Cima3_cpx39	PHENO	VERM	49.3118	2.3995	3.8111	0.2363	7.4376	0.1442	14.2644	22.1319	0.4748	0.0194	100.231	77.3694	-0.00754019
Cima3_cpx39	PHENO	NS	46.4667	2.5871	6.8992	0.6036	6.973	0.1374	13.1689	21.9215	0.5262	0.0396	99.323	77.0985	0.0391471
Cima3_cpx39	PHENO	NS	49.1517	1.3951	6.277	0.552	5.9545	0.1222	15.428	20.3597	0.6641	0.0308	99.9352	82.2022	0.0715512
Cima3_cpx39	PHENO	VERM	46.7945	2.3055	6.6631	0.553	6.7495	0.1402	13.7731	21.6541	0.5511	0.0206	99.2047	78.437	0.0360915
Cima3_cpx40	MICRO	VERM	46.8875	3.2585	5.5473	0.1516	8.0948	0.1531	13.2686	22.3429	0.5712	0.0105	100.286	74.5024	-0.0155107
Cima3_cpx40	MICRO	VERM	46.4386	2.4815	7.6599	0.4792	6.7853	0.1252	13.5956	21.3849	0.588	0.0171	99.5553	78.1266	0.0584943
Cima3_cpx40	MICRO	VERM	46.2762	3.6024	5.5689	0.0437	8.6437	0.1759	12.5721	21.8403	0.5837	0.0072	99.3139	72.1662	-0.00972574
Cima3_cpx41	PHENO	VERM	46.8257	2.6701	6.053	0.6738	7.1266	0.1495	13.6151	22.1117	0.5291	-0.0007	99.7539	77.3015	0.00669807
Cima3_cpx41	PHENO	NS	49.4452	1.1367	5.446	0.4015	7.6304	0.1738	14.8693	19.2313	0.9999	0.0046	99.3388	77.6473	0.0652053
Cima3_cpx41	PHENO	NS	52.0181	0.391	3.923	0.2298	13.7537	0.2529	27.9852	1.2532	0.0802	0.0562	99.9433	78.3883	0.0212762
Cima3_cpx41	PHENO	NS	48.458	1.1296	5.6449	0.4302	7.5962	0.1743	14.6953	19.4299	1.0428	0.0392	98.6403	77.5207	0.0506791
Cima3_cpx42	PHENO	SZ/OZ	46.5074	2.1109	7.2163	0.6569	6.4905	0.1208	13.9261	21.4986	0.6115	0.0272	99.1663	79.2736	0.0449841
Cima3_cpx42	PHENO	VERM	47.1597	1.7856	6.6831	0.0344	7.562	0.1422	13.5277	22.1033	0.4101	0.0207	99.4288	76.1273	0.048246
Cima3_cpx42	PHENO	VERM	48.7057	1.712	11.3179	0.421	6.0649	0.123	9.9973	18.9232	1.8567	0.0209	99.1426	74.609	0.30884
Cima3_cpx42	PHENO	SZ/OZ	45.6268	3.7054	5.456	-0.007	9.2152	0.1828	12.0615	21.7043	0.6811	0.0078	98.6339	69.9987	-0.0208119
Cima3_cpx43	PHENO	VERM	49.3466	2.1636	2.884	0.0003	8.4418	0.2057	13.9968	21.79	0.4927	0.0101	99.3316	74.7194	-0.0234824
Cima3_cpx43	PHENO	VERM	47.9257	2.1709	4.7359	0.1678	6.9944	0.1359	14.0937	22.3957	0.4992	0.0133	99.1325	78.2226	-0.00313736
Cima3_cpx43	PHENO	VERM	47.781	2.2747	4.9162	0.428	6.9609	0.1425	14.1039	22.2158	0.4326	0.0135	99.2692	78.3166	-0.00112788
Cima3_cpx44	PHENO	NS	47.3342	1.4014	6.9696	0.0689	10.4176	0.247	13.0851	18.1799	1.1188	0.0071	98.8295	69.1267	0.0833819
Cima3_cpx44	PHENO	NS	47.0826	1.3835	7.0429	0.0651	10.4602	0.2441	13.121	18.229	1.0766	0.0106	98.7155	69.098	0.0794861
Cima3_cpx44	PHENO	VERM	47.4106	2.3788	4.78	0.3737	7.1463	0.1392	13.9252	22.1961	0.4739	0.0123	98.836	77.6464	-0.0106385
Cima3_cpx45	PHENO	VERM	46.6388	2.3138	6.7018	0.672	6.8683	0.138	13.5324	21.0877	0.6141	0.0099	98.5768	77.8378	0.0466615
Cima3_cpx45	PHENO	VERM	48.6531	1.4299	6.0525	0.5614	6.0011	0.1109	15.246	20.4961	0.6915	0.029	99.2714	81.9127	0.0582185
Cima3_cpx45	PHENO	VERM	49.5657	1.91	3.5838	0.2655	7.0212	0.1586	14.7666	22.0152	0.4504	0.0076	99.7445	78.9432	-0.00572053
Cima3_cpx45	PHENO	VERM	49.1049	2.2832	3.0449	0.026	8.2378	0.1829	14.1675	21.9402	0.5023	0.0155	99.505	75.4042	-0.0310779
Cima3_cpx46	PHENO	VERM	48.7438	1.9781	4.8043	0.1968	7.0543	0.172	14.9711	21.6348	0.5105	0.0101	100.076	79.0932	0.00480692
Cima3_cpx46	PHENO	VERM	47.3891	2.6234	4.825	0.3905	7.5106	0.1531	13.6468	21.9588	0.5223	0.0148	99.0343	76.4094	-0.00885898
Cima3_cpx46	PHENO	VERM	47.4359	1.9785	5.8783	0.1434	7.6193	0.1604	14.3708	20.7254	0.5075	0.0144	98.8339	77.0756	0.0311855
Cima3_cpx46	PHENO	VERM	49.07	2.1447	3.157	0.0878	7.7855	0.1627	14.3643	21.911	0.4902	-0.0005	99.1726	76.684	-0.0251014
Cima3_cpx47	MICRO	VERM	49.6718	2.4358	3.0819	0.0086	8.6751	0.2037	13.7622	22.0193	0.4719	0.0002	100.331	73.8761	-0.0176409
Cima3_cpx47	MICRO	VERM	48.3234	2.0427	4.616	0.3871	7.1165	0.1613	14.2114	21.3866	0.5068	0.0065	98.7582	78.0691	0.014706
Cima3_cpx47	MICRO	VERM	47.1436	2.5838	5.7186	0.3134	7.496	0.1354	13.4317	21.8497	0.5476	0.0005	99.2203	76.1572	0.016006
Cima3_cpx47	MICRO	VERM	47.0632	2.3014	6.5233	0.5538	6.6234	0.1309	14.007	21.822	0.5056	-0.0081	99.5224	79.0347	0.032232
Cima3_cpx48	PHENO	NS	48.3911	1.981	4.5518	0.2938	6.9823	0.1414	14.4554	21.8222	0.4641	-0.0021	99.081	78.6803	0.00526367
Cima3_cpx48	PHENO	NS	45.5243	2.8327	8.5382	0.5659	7.1679	0.1442	12.9448	22.0156	0.5984	0.023	100.355	76.2992	0.0530852
Cima3_cpx48	PHENO	NS	44.7611	2.9237	8.3632	0.4501	7.256	0.1355	12.8739	21.3199	0.5982	0.0186	98.7002	75.9774	0.0510147
Cima3_cpx48	PHENO	NS	49.2948	1.6963	4.7515	0.3633	6.6196	0.1358	15.0874	21.7472	0.4654	-0.0026	100.159	80.2484	0.018843
Cima3_cpx48	PHENO	NS	49.4223	2.0377	3.5281	0.2014	7.426	0.1647	14.6631	22.1176	0.4589	0.0047	100.024	77.8753	-0.0162084
Cima3_cpx49	PHENO	VERM	47.266	1.9076	7.7768	0.7063	6.0601	0.1164	13.6717	20.5405	0.7962	0.019	98.8605	80.0859	0.100226
Cima3_cpx49	PHENO	VERM	48.7297	1.9186	4.9607	0.1501	7.4716	0.1594	14.3069	21.5467	0.528	0.0088	99.7804	77.3416	0.0227486
Cima3_cpx49	PHENO	VERM	48.285	2.028	4.9113	0.3109	6.9887	0.1568	14.6482	21.4465	0.4753	0.004	99.2547	78.8864	0.0115658
Cima3_cpx49	PHENO	VERM	46.6074	3.4641	5.3416	0.0271	8.5694	0.1502	12.7068	21.8955	0.6235	-0.0005	99.3853	72.552	-0.0108977
Cima3_cpx50	PHENO	VERM	44.2802	3.7035	7.1622	0.0614	8.544	0.1606	12.3968	21.619	0.5713	0.0038	98.5029	72.1171	-0.00197068
Cima3_cpx50	PHENO	NS	46.419	1.9699	8.6434	0.7612	6.125	0.1207	14.2024	20.2951	0.7323	0.0252	99.294	80.5198	0.0923666
Cima3_cpx50	PHENO	NS	46.7496	1.8464	8.099	0.6744	5.8881	0.1179	14.2897	20.665	0.6944	0.0306	99.0551	81.2247	0.0849664
Cima3_cpx50	PHENO	NS	47.2127	2.0577	5.3584	0.5557	8.2762	0.142	15.8022	20.3962	0.5981	0.0156	100.415	77.2913	-0.0373365
Cima3_cpx50	PHENO	NS	46.5807	2.0303	8.2561	0.6811	6.1518	0.1271	14.0346	20.817	0.6841	0.0188	99.3816	80.2636	0.082832
Cima3_cpx51	PHENO	VERM	47.1932	1.874	6.7963	0.6689	6.2947	0.1237	14.1652	21.0827	0.5993	0.0011	98.7991	80.0457	0.0572878
Cima3_cpx51	PHENO	VERM	46.6055	2.6961	6.4037	0.5636	7.1768	0.1368	13.488	22.0442	0.5018	-0.0031	99.6133	77.0125	0.0168385
Cima3_cpx51	PHENO	VERM	47.22	2.6469	5.4948	0.4	7.1328	0.145	13.5495	22.0324	0.5099	0.0077	99.1389	77.2014	0.0101214
Cima3_cpx52	PHENO	VERM	45.2598	4.0737	6.06	0.0108	8.8697	0.1882	12.1426	21.6361	0.6403	0.0146	98.8957	70.9333	-0.013914
Cima3_cpx52	PHENO	VERM	46.9271	2.4116	6.7507	0.0106	7.3207	0.1276	13.5288	22.3981	0.4241	0.001	99.9004	76.7132	0.0347496
Cima3_cpx52	PHENO	VERM	47.1973	2.3082	6.1435	-0.002	8.1535	0.1515	13.34	21.9764	0.4358	-0.0046	99.6996	74.4671	0.0282481
Cima3_cpx52	PHENO	VERM	47.317	2.5891	4.9036	0.4412	7.4436	0.1517	13.8366	21.8177	0.5106	0.0117	99.023	76.8175	-0.00967625
Cima3_cpx53	PHENO	VERM	46.1709	3.0392	5.4911	0.4272	7.7361	0.1452	13.0884	21.916	0.5626	0.005	98.5817	75.099	-0.0116654
Cima3_cpx53	PHENO	NS	48.4173	1.6202	6.7523	0.1823	6.9754	0.1594	14.41	19.3967	1.0651	0.0436	99.0223	78.6441	0.0882126
Cima3_cpx53	PHENO	NS	48.6984	1.3601	6.1953	0.2068	6.6335	0.1322	15.2253	19.8753	0.8603	0.0322	99.2193	80.3592	0.0651806
Cima3_cpx53	PHENO	NS	49.775	1.0953	5.2216	0.1805	7.0286	0.1449	15.3248	19.2623	0.9809	0.0513	99.0651	79.5362	0.0667209
Cima3_cpx53	PHENO	VERM	48.4737	1.4411	6.3795	0.6149	6.0068	0.1262	15.2692	20.2588	0.6975	0.0275	99.2952	81.9212	0.0645865
Cima3_cpx54	PHENO	NS	47.5629	2.4183	5.6461	0.4191	7.0473	0.1536	14.0422	21.9721	0.4876	0.0064	99.7554	78.0313	0.0121673
Cima3_cpx54	PHENO	NS	46.8095	2.7923	5.8611	0.6088	7.42	0.1396	13.1129	21.7748	0.5323	0.0165	99.068	75.9052	0.0174612
Cima3_cpx54	PHENO	NS	49.2888	2.4271	3.02	0.0125	8.7591	0.2062	13.7871	21.8709	0.5073	-0.0008	99.8783	73.7247	-0.0264523
Cima3_cpx55	PHENO	VERM	46.3838	2.7159	5.9378	0.4455	7.1623	0.1338	13.6209	22.1803	0.4651	0.0302	99.0756	77.2212	-0.00143257
Cima3_cpx55	PHENO	NS	47.5974	2.4075	6.1119	0.1675	7.6244	0.1477	14.3716	20.822	0.603	0.0106	99.8635	77.0647	0.0275963
Cima3_cpx55	PHENO	VERM	49.0058	2.1743	3.3879	0.1701	7.5008	0.1605	14.316	22.1417	0.4827	0.0098	99.3495	77.2844	-0.0214866
Cima3_cpx56	PHENO	NS	47.374	2.5897	5.1356	0.3132	7.3826	0.1487	13.5053	22.0362	0.5226	0.0043	99.0122	76.5312	0.00397621
Cima3_cpx56	PHENO	NS	47.4702	2.3469	5.1034	0.3474	7.1091	0.1488	13.8474	22.1139	0.4831	0.0252	98.9953	77.6397	0.00219941
Cima3_cpx56	PHENO	NS	47.9012	2.1102	4.8163	0.4764	6.9668	0.1396	14.1065	22.0042	0.45	0.0115	98.9827	78.3053	0.00406064
Cima3_cpx56	PHENO	NS	47.0179	2.5062	5.7974	0.5393	7.1508	0.119	13.6289	22.0714	0.5229	0.0013	99.355	77.2598	0.00968231
Cima3_cpx57	MICRO	NS	49.4564	2.2448	2.7196	0.0024	9.0869	0.237	13.5957	21.7391	0.485	0.0096	99.5764	72.7305	-0.0243625
Cima3_cpx57	MICRO	NS	49.3622	2.305	4.3145	0.2959	7.3132	0.1419	14.0344	21.9679	0.5557	0.0218	100.313	77.3801	0.0135456
Cima3_cpx57	MICRO	VERM	48.2506	2.1738	4.3999	0.3592	7.0476	0.1466	14.2515	22.0695	0.56	0.0103	99.2689	78.2832	-0.00824941
Cima3_cpx57	MICRO	VERM	47.855	2.3486	5.0906	0.4045	7.0411	0.1425	14.0888	22.1318	0.4932	0.0142	99.6103	78.1031	0.00212333
Cima3_cpx57	MICRO	VERM	48.457	1.9287	4.0771	0.4266	6.934	0.1445	14.6768	21.7119	0.4528	0.0251	98.8345	79.0493	-0.00845996
Cima3_cpx58	PHENO	VERM	46.6098	3.0578	5.1656	0.0701	8.0619	0.1624	13.0514	21.8629	0.5598	0.0154	98.617	74.2655	-0.0089246
Cima3_cpx58	PHENO	NS	46.4309	1.934	8.2563	0.6238	6.043	0.1115	14.0673	20.7398	0.6943	0.0193	98.9202	80.5812	0.0847428
Cima3_cpx58	PHENO	VERM	46.2112	3.2759	5.5279	0.2559	7.7578	0.1477	13.0454	21.9157	0.5479	0.002	98.6876	74.9849	-0.00948821
Cima3_cpx59	PHENO	VERM	47.6767	2.5391	5.5597	0.4441	7.0838	0.1447	13.7625	22.2009	0.4875	0.017	99.9159	77.5948	0.0129419
Cima3_cpx59	PHENO	NS	46.0918	2.8578	6.2116	0.509	7.3775	0.1331	13.2647	22.0754	0.5109	0.016	99.0479	76.2193	0.00352153
Cima3_cpx59	PHENO	VERM	47.6791	2.5309	4.3209	0.1462	8.0235	0.1641	13.5488	21.8429	0.5205	0.0284	98.8053	75.0633	-0.012981
Cima3_cpx60	PHENO	VERM	49.1115	2.3077	3.185	0.0061	8.4554	0.1994	14.0529	21.5782	0.4929	-0.012	99.377	74.7645	-0.0204366
Cima3_cpx60	PHENO	VERM	48.7206	1.4413	6.355	0.2423	6.5622	0.1432	15.6118	19.8074	0.6531	0.0464	99.5832	80.9192	0.0657223
Cima3_cpx60	PHENO	VERM	48.9729	1.3004	6.5011	0.1636	8.0908	0.1576	14.184	18.7904	1.2328	0.0387	99.4322	75.758	0.0928492
Cima3_cpx60	PHENO	VERM	48.504	1.2503	6.3027	0.1451	8.0785	0.1824	14.1893	18.7113	1.1596	0.0531	98.5762	75.7928	0.0850931
Cima3_cpx60	PHENO	VERM	47.4709	2.0928	6.6208	0.5348	6.6853	0.1455	13.8637	21.2691	0.5453	0.0226	99.2508	78.7083	0.0572057
Cima3_cpx61	PHENO	NS	48.9829	2.217	3.5716	0.1869	7.3584	0.1545	14.3193	22.27	0.4682	0.0004	99.5293	77.6231	-0.0183743
Cima3_cpx61	PHENO	NS	47.3047	2.5877	5.2287	0.1038	7.4612	0.1532	13.7542	21.9684	0.4484	0.0186	99.0291	76.6687	0.00333055
Cima3_cpx61	PHENO	NS	47.507	2.7547	5.1137	0.2583	7.6646	0.161	13.2785	22.2621	0.5834	0.0177	99.6009	75.5396	-0.000668701
Cima3_cpx61	PHENO	NS	48.3431	2.3744	4.4311	0.2464	7.4862	0.1499	14.092	22.1511	0.4832	0.0182	99.7756	77.0408	-0.00851366
Cima3_cpx62	PHENO	VERM	48.9052	2.0924	3.5772	0.1526	7.5749	0.167	14.1118	21.6864	0.5016	0.0053	98.7743	76.8568	-0.00487996
Cima3_cpx62	PHENO	NS	49.2063	1.1498	5.7444	0.2782	8.1114	0.1586	14.5005	19.8409	1.0439	0.0428	100.077	76.1148	0.0573728
Cima3_cpx62	PHENO	NS	49.0644	1.0904	5.9993	0.2975	8.1439	0.1434	14.3762	18.7575	1.2093	0.05	99.1319	75.8848	0.080194
Cima3_cpx62	PHENO	NS	48.886	1.4344	6.4155	0.2486	6.5485	0.1365	16.2284	18.903	0.6588	0.0202	99.4798	81.5416	0.0714035
Cima3_cpx62	PHENO	VERM	49.0934	1.2334	5.2989	0.5214	6.0521	0.1356	16.168	19.8595	0.6058	0.0294	98.9976	82.6454	0.0422672
Cima3_cpx63	PHENO	VERM	46.5905	2.6992	6.4627	0.6105	7.5782	0.1429	13.1276	21.861	0.5281	0.0183	99.6191	75.5379	0.0232441
Cima3_cpx63	PHENO	VERM	48.0334	1.415	7.548	0.1059	9.1082	0.1717	13.6129	18.8804	1.029	0.0144	99.9189	72.7091	0.102877
Cima3_cpx63	PHENO	VERM	46.3361	2.1099	8.4904	0.1019	9.443	0.1924	13.2468	18.3066	1.0464	0.0448	99.3184	71.4339	0.0981178
Cima3_cpx63	PHENO	VERM	47.6161	2.0518	6.9648	0.5338	6.6631	0.1371	14.0573	21.2365	0.6524	0.0133	99.9262	78.995	0.0597124
Cima3_cpx64	MICRO	VERM	47.7395	2.1445	4.8049	0.2308	6.994	0.1562	14.2104	21.8586	0.4737	0.011	98.6237	78.3638	0.00245608
Cima3_cpx64	MICRO	VERM	48.7612	1.4645	4.5405	0.167	6.958	0.16	15.08	21.2267	0.4263	0.0178	98.8021	79.4382	0.0166428
Cima3_cpx64	MICRO	VERM	46.5759	2.2712	6.5196	0.3149	6.8934	0.139	13.6803	21.9838	0.4255	0.0193	98.8228	77.9622	0.031147
Cima3_cpx64	MICRO	VERM	46.2659	2.5656	5.7391	0.6327	7.0769	0.1311	13.5181	22.1235	0.5265	0.0002	98.5796	77.2988	-0.00498912
Cima3_cpx64	MICRO	VERM	47.1777	3.1176	4.6573	0.0782	8.4516	0.1723	12.8674	21.8835	0.5812	0.0035	98.9902	73.0746	-0.0125853
Cima3_cpx65	MICRO	VERM	48.0387	2.4451	5.3513	0.2548	7.0394	0.1454	14.076	22.0792	0.4736	0.0208	99.9243	78.0917	0.0140154
Cima3_cpx65	MICRO	VERM	47.037	2.8547	5.704	0.2301	7.1557	0.141	14.0454	20.9861	0.5346	0.0038	98.6923	77.7725	0.0169889
Cima3_cpx65	MICRO	VERM	47.7213	2.5669	5.4958	0.3354	7.3963	0.1334	13.5906	21.4875	0.4882	0.006	99.2216	76.6109	0.0282211
Cima3_cpx65	MICRO	VERM	48.3188	1.9071	5.0706	0.1417	7.1741	0.143	14.4558	21.5795	0.4553	0.0044	99.2501	78.2226	0.0205779
Cima3_cpx65	MICRO	VERM	46.3762	2.3824	7.2198	0.5095	7.0941	0.1162	13.4855	21.4623	0.654	0.0189	99.319	77.2138	0.043337
Cima3_cpx66	PHENO	VERM	46.6958	3.0524	5.2496	0.1859	7.7507	0.1552	13.2103	21.9388	0.554	0.0204	98.8132	75.2368	-0.00791243
Cima3_cpx66	PHENO	VERM	47.5504	2.821	5.1687	0.1386	7.6153	0.1565	13.7871	22.0584	0.4811	0.0049	99.7819	76.3442	-0.00329254
Cima3_cpx66	PHENO	VERM	46.2178	3.2417	6.1543	0.1726	7.8679	0.1522	12.995	21.8859	0.5355	0.0203	99.2433	74.6464	0.00662249
Cima3_cpx66	PHENO	VERM	47.3328	2.5439	5.8441	0.1624	7.1923	0.1355	13.8354	21.9917	0.4963	0.0053	99.5396	77.4219	0.0173664
Cima3_cpx66	PHENO	VERM	48.1677	2.0797	5.8266	0.0681	7.8869	0.1831	12.8351	20.6226	1.0445	0.0069	98.7211	74.3654	0.0654426
Cima3_cpx67	PHENO	VERM	49.1853	2.1144	3.1014	0.0531	7.8633	0.1731	14.4524	21.803	0.4838	0.0122	99.2419	76.6155	-0.0248576
Cima3_cpx67	PHENO	VERM	46.767	2.5659	5.7078	0.5529	7.1386	0.1231	13.4732	21.9576	0.5104	-0.0033	98.7933	77.0875	0.00928764
Cima3_cpx67	PHENO	VERM	46.2991	3.0256	5.5022	0.423	7.6131	0.1404	13.1258	22.1153	0.5496	0.0193	98.8134	75.4504	-0.0115432
Cima3_cpx67	PHENO	VERM	46.446	2.8346	6.0638	0.6314	7.3926	0.1455	12.9905	21.921	0.5117	0.0116	98.9487	75.8012	0.0158289
Cima3_cpx67	PHENO	VERM	46.3923	3.4842	5.2917	0.0156	8.7101	0.1666	12.61	21.6897	0.6444	0.0163	99.021	72.0728	-0.0128203
Cima3_cpx68	PHENO	VERM	49.2173	2.0983	3.5878	0.2314	7.2133	0.1637	14.3463	22.0007	0.4493	0.0014	99.3096	77.9995	-0.00527489
Cima3_cpx68	PHENO	VERM	47.5812	1.9006	7.2147	0.5893	6.7478	0.1352	14.152	20.1724	0.6854	0.0063	99.1849	78.8967	0.0824367
Cima3_cpx68	PHENO	NS	47.4855	1.5656	7.0487	0.641	5.913	0.1108	14.7287	20.5689	0.6831	0.0026	98.748	81.6185	0.0705432
Cima3_cpx68	PHENO	NS	48.2281	1.4797	6.4791	0.614	5.8922	0.1218	14.9629	20.5327	0.6836	0.0042	98.9983	81.9063	0.0676286
Cima3_cpx68	PHENO	NS	46.3682	1.8955	7.9094	0.7493	6.0651	0.1206	14.2508	20.5636	0.7196	0.0214	98.6633	80.7264	0.071883
Cima3_cpx69	PHENO	NS	44.2952	3.1931	10.6454	0.2461	7.191	0.1207	12.4568	20.5401	0.7971	0.0151	99.5005	75.5378	0.112549
Cima3_cpx69	PHENO	NS	46.4632	2.3366	7.5995	0.4549	6.7917	0.1184	13.553	21.3474	0.5658	0.0103	99.2409	78.0567	0.063001
Cima3_cpx70	PHENO	VERM	48.3288	2.5294	4.4726	0.1686	7.6523	0.1445	13.887	22.1843	0.494	0.0126	99.874	76.387	-0.00666111
Cima3_cpx70	PHENO	VERM	49.0847	1.333	6.2768	0.5257	5.7817	0.1153	15.2967	20.511	0.7977	0.0148	99.7375	82.5059	0.0706701
Cima3_cpx70	PHENO	VERM	48.169	2.4692	4.3905	0.1627	7.5547	0.1579	13.8744	21.9565	0.5176	0.0292	99.2817	76.6015	-0.00540834
Cima3_cpx70	PHENO	VERM	47.4976	2.4064	5.2183	0.5536	7.1794	0.1423	13.7029	22.0312	0.511	0.0045	99.2472	77.2848	0.00539102
Cima3_cpx70	PHENO	VERM	47.3453	1.5775	7.032	0.5859	5.9489	0.119	14.8763	20.5157	0.708	0.0323	98.7408	81.6773	0.0631495
Cima3_cpx70	PHENO	VERM	49.1611	2.071	3.305	0.1256	7.5208	0.1726	14.4901	22.1613	0.4751	0.0032	99.4859	77.4494	-0.0236278
Cima3_cpx71	MICRO	VERM	45.4584	3.3899	6.3689	0.1616	8.3188	0.1573	12.3707	21.6365	0.6711	0.0044	98.5375	72.6092	0.00608054
Cima3_cpx71	MICRO	VERM	49.2157	1.5984	3.9327	0.1523	7.6833	0.2041	14.7073	21.2128	0.4672	0.0264	99.2001	77.3357	0.00718724
Cima3_cpx71	MICRO	VERM	48.314	1.7177	4.3961	0.0873	8.0983	0.2	14.385	20.8419	0.5821	0.0066	98.629	75.9986	0.00616244
Cima3_cpx71	MICRO	VERM	48.2977	2.2252	4.7523	0.3209	7.1119	0.1451	14.3465	21.9852	0.4995	0.0112	99.6956	78.2417	0.000359744
Cima3_cpx72	PHENO	SZ/OZ	49.1135	2.2196	3.3705	0.0283	7.9638	0.1656	14.2749	22.1256	0.4801	0.0075	99.7494	76.1635	-0.0240484
Cima3_cpx72	PHENO	NS	46.8615	2.63	5.0663	0.537	7.8123	0.1519	13.2834	21.8949	0.5524	0.0102	98.8	75.1921	-0.00997359
Cima3_cpx72	PHENO	SZ/OZ	47.2067	2.6465	4.9959	0.1733	7.866	0.1588	13.5912	22.0962	0.5391	0	99.2737	75.4904	-0.0128067
Cima3_cpx73	PHENO	NS	48.7798	2.2838	3.9662	0.1424	7.5057	0.1517	14.2624	22.1208	0.4588	0.0219	99.6935	77.207	-0.0114558
Cima3_cpx73	PHENO	NS	48.1205	2.2562	4.687	0.2971	7.0774	0.1455	14.2372	22.0591	0.4681	0.0001	99.3483	78.1942	-0.00110775
Cima3_cpx73	PHENO	NS	47.6661	2.6577	4.6009	0.1892	7.545	0.1441	13.7244	22.2423	0.5243	0.0222	99.3162	76.4293	-0.0145194
Cima3_cpx73	PHENO	NS	47.0847	3.1272	5.2609	0.1874	7.7791	0.1582	13.3231	21.9344	0.5403	0.0122	99.4075	75.327	-0.00435987
Cima3_cpx74	PHENO	SZ/OZ	48.9702	2.4627	3.5268	0.0325	8.5438	0.1906	13.7647	21.5693	0.5659	0.0156	99.6421	74.1728	-0.0140791
Cima3_cpx74	PHENO	NS	46.4522	1.9914	8.0618	0.6751	6.0984	0.1326	13.9422	20.9216	0.6889	-0.0011	98.9631	80.297	0.0785394
Cima3_cpx74	PHENO	NS	46.5548	1.7366	7.675	0.6377	6.0971	0.1216	14.253	20.7075	0.7061	0.0159	98.5054	80.6468	0.0712828
Cima3_cpx74	PHENO	SZ/OZ	45.6801	3.8264	5.5755	0.017	8.7335	0.1763	12.5023	21.8209	0.5974	0.0229	98.9522	71.8456	-0.0234743
Cima3_cpx75	PHENO	VERM	49.1088	2.2871	5.3746	0.1172	7.5815	0.1716	13.8927	20.696	0.639	0.0142	99.8827	76.5616	0.0567412
Cima3_cpx75	PHENO	VERM	48.6847	1.5464	5.1437	0.0345	8.2516	0.1757	13.623	21.0282	0.7151	0.0245	99.2276	74.6385	0.0432494
Cima3_cpx75	PHENO	SZ/OZ	48.6432	2.242	3.2036	0.0076	8.2061	0.1856	13.8901	21.8367	0.4823	0.0039	98.701	75.1078	-0.0244438
Cima3_cpx76	PHENO	VERM	48.6072	1.4218	6.2745	0.5567	5.9488	0.138	15.269	20.4295	0.6673	0.0182	99.3309	82.0642	0.0643851
Cima3_cpx76	PHENO	VERM	47.4062	2.268	5.3266	0.5193	6.947	0.1371	13.9387	22.181	0.4871	0.0189	99.23	78.15	0.0032693
Cima3_cpx76	PHENO	VERM	46.3406	3.626	5.6217	0.0282	8.5135	0.1684	12.5172	21.7044	0.6227	0.0182	99.161	72.3826	-0.00253036
Cima3_cpx77	PHENO	VERM	46.2555	3.6579	5.8645	0.0819	8.2339	0.1665	12.6736	21.8147	0.5743	0.0021	99.3248	73.2889	-0.00022954
Cima3_cpx77	PHENO	VERM	50.6591	0.6067	2.8546	0.044	11.1301	0.2351	13.2308	19.9579	0.8441	0.0023	99.5646	67.9389	0.0252248
Cima3_cpx77	PHENO	VERM	49.9147	0.7842	3.6313	0.0425	11.3394	0.2487	12.801	19.687	0.975	0.0137	99.4375	66.8035	0.0352257
Cima3_cpx77	PHENO	VERM	46.9562	2.3694	5.7946	0.4284	7.1916	0.1304	13.956	21.6374	0.498	0.0169	98.979	77.5749	0.0114348
Cima3_cpx78	MICRO	VERM	45.7747	2.9963	6.7517	0.4112	7.5173	0.1493	13.0911	21.6461	0.5222	0.0045	98.8644	75.6354	0.019866
Cima3_cpx78	MICRO	VERM	47.3536	1.7422	7.8979	0.6038	5.9883	0.1236	14.7037	20.1281	0.7177	0.0299	99.2886	81.4022	0.0906974
Cima3_cpx78	MICRO	VERM	45.842	2.7962	7.0237	0.5759	7.2456	0.1422	12.9312	21.9308	0.5191	0.0002	99.007	76.0845	0.030788
Cima3_cpx78	MICRO	VERM	46.8847	2.2936	6.4367	0.5815	6.9591	0.1493	13.5853	21.5724	0.5301	0.0031	98.9959	77.6782	0.0371202
Cima3_cpx78	MICRO	VERM	46.5495	2.6894	6.0438	0.1597	7.8497	0.1682	13.5399	21.5759	0.518	0.0046	99.0987	75.4588	0.0102442
Cima3_cpx79	PHENO	VERM	51.5377	0.8418	1.4637	0.0034	8.6186	0.2736	16.9491	19.8365	0.3537	-0.0084	99.8698	77.8054	-0.0365686
Cima3_cpx79	PHENO	SZ/OZ	45.744	3.0311	6.2034	0.4021	7.4534	0.1353	13.3645	22.1237	0.5346	0.0243	99.0164	76.1696	-0.00998324
Cima3_cpx79	PHENO	SZ/OZ	48.7712	2.0177	3.219	0.1569	7.5309	0.1871	14.6264	21.9024	0.4596	-0.0056	98.8656	77.5892	-0.0309958
Cima3_cpx80	PHENO	NS	46.4381	2.1305	8.6945	0.7007	6.1583	0.119	14.0388	20.5064	0.7202	0.0297	99.5362	80.2516	0.0925449
Cima3_cpx80	PHENO	NS	46.5879	1.9232	8.0023	0.7226	5.9936	0.1119	14.0492	20.7397	0.711	0.0104	98.8517	80.6892	0.081713
Cima3_cpx80	PHENO	NS	46.881	1.8844	8.0196	0.7334	5.9815	0.0973	14.2333	20.6949	0.7254	0.0114	99.2621	80.9225	0.0832133
Cima3_cpx80	PHENO	VERM	49.2504	2.4447	3.468	0.0118	8.2381	0.2053	14.0079	21.7195	0.5314	0.0116	99.8885	75.1928	-0.0135063
Cima3_cpx81	PHENO	VERM	47.7577	2.3879	5.0574	0.3831	7.1889	0.1515	13.9261	21.9913	0.4782	0.0326	99.3546	77.5442	0.00447325
Cima3_cpx81	PHENO	VERM	47.855	2.6538	5.0366	0.2852	7.4375	0.1551	13.7285	22.0477	0.5074	0.0184	99.7252	76.6921	0.00317513
Cima3_cpx81	PHENO	VERM	52.7706	0.6756	0.4933	0.0318	7.5785	0.1741	15.4399	22.5738	0.3885	0.003	100.129	78.4098	-0.0294608
Cima3_cpx81	PHENO	VERM	50.9068	1.0678	1.5463	0.0503	7.5346	0.161	15.3385	22.2367	0.4069	0.0043	99.2531	78.3966	-0.0372754
Cima3_cpx82	PHENO	NS	46.9113	2.0893	7.0889	0.7228	6.4779	0.1214	13.8193	21.5052	0.5853	0.03	99.3516	79.1788	0.0528712
Cima3_cpx82	PHENO	VERM	49.9929	0.8944	3.6376	0.1271	10.2125	0.2127	15.1236	19.0348	0.637	0.0272	99.8998	72.5262	0.0118354
Cima3_cpx82	PHENO	VERM	50.069	1.1659	3.7785	0.1429	7.2511	0.1741	16.6546	19.903	0.5308	0.0087	99.6784	80.3703	0.00318816
Cima3_cpx82	PHENO	NS	47.6406	2.9768	4.6633	0.0813	8.301	0.1613	13.2535	21.9304	0.5283	-0.0036	99.5328	73.9997	-0.00899133
Cima3_cpx83	PHENO	VERM	48.6766	2.2109	4.7305	0.3518	7.0363	0.1521	14.0549	22.3166	0.4688	0.0114	100.01	78.0736	0.0102412
Cima3_cpx83	PHENO	VERM	46.9128	2.5482	5.9133	0.5503	7.0645	0.1153	13.7016	21.9164	0.493	0.0284	99.2438	77.5651	0.0126323
Cima3_cpx83	PHENO	VERM	47.9705	2.1834	5.0898	0.5464	6.7841	0.1393	14.3878	22.0481	0.4608	0.0172	99.6274	79.0819	0.00297329
Cima3_cpx83	PHENO	VERM	47.496	2.3856	5.159	0.5907	7.2961	0.1499	13.8152	22.119	0.5033	0.0165	99.5311	77.1447	-0.00294133
Cima3_cpx83	PHENO	VERM	47.3023	2.4522	5.5217	0.2649	7.0275	0.1276	13.9375	22.2162	0.4645	0.0179	99.3324	77.9511	0.00580574
oxide wt %	pheno vs micro	Texture	SiO2	TiO2	Al2O3	Cr2O3	FeO	MnO	MgO	CaO	Na2O	NiO	sum	Mg#	Al VI
Cima5_cpx21	micro	SZ/OZ	55.8152	0.2312	27.0899	0.0066	0.685	0.0022	0.0466	9.5808	5.8946	0.0047	99.3569	10.8153	1.19649
Cima5_cpx21	micro	SZ/OZ	48.8086	2.5369	3.644	0.0146	9.1491	0.2269	13.0036	21.2728	0.6005	-0.0108	99.2462	71.7002	0.00102368
Cima5_cpx21	micro	SZ/OZ	47.2595	3.4307	4.913	0.0125	9.0197	0.1915	12.7888	21.5335	0.6298	-0.0031	99.7759	71.6513	-0.0103432
Cima5_cpx21	micro	SZ/OZ	47.6379	2.988	4.5143	0.0264	8.6517	0.1732	13.3239	21.5843	0.6308	0.0044	99.5348	73.2995	-0.0160707
Cima5_cpx21	micro	SZ/OZ	47.4216	3.1704	4.6256	0.049	8.4771	0.193	13.2188	21.6254	0.5957	0.0123	99.3889	73.5428	-0.0149704
Cima5_cpx21	micro	SZ/OZ	47.7986	2.86	4.6931	0.0608	8.3982	0.1693	13.4911	21.8394	0.6251	0.0089	99.9445	74.1175	-0.0133705
Cima5_cpx21	micro	SZ/OZ	48.9207	2.5669	3.4558	0.0221	8.7797	0.1963	13.8278	21.4413	0.5434	0.0141	99.7681	73.7363	-0.0200366
Cima5_cpx22	micro	verm	48.7698	2.4229	4.4368	0.0062	8.202	0.1722	13.786	21.5496	0.5574	0.0133	99.9163	74.9762	0.00889206
Cima5_cpx22	micro	verm	47.8351	2.6559	4.9928	0.0194	8.6338	0.1687	13.1168	21.4536	0.6167	0.0006	99.4936	73.0326	0.0122757
Cima5_cpx22	micro	verm	47.9266	2.4036	4.4276	0.0416	8.2722	0.1877	13.6033	21.45	0.5605	0.0144	98.8874	74.5638	-0.00167156
Cima5_cpx22	micro	SZ/OZ	48.0743	2.3975	5.0403	0.0195	8.4151	0.166	13.494	21.7614	0.5553	0.0187	99.9421	74.083	0.00999623
Cima5_cpx22	micro	SZ/OZ	48.5369	2.3161	4.3943	0.0485	8.2403	0.1728	13.7566	21.7847	0.5339	-0.0038	99.7803	74.8486	0.0011013
Cima5_cpx22	micro	SZ/OZ	47.7707	2.9754	4.5956	0.0059	8.4285	0.1706	13.2471	21.7042	0.5486	0.0013	99.4479	73.696	-0.00512612
Cima5_cpx23	micro	SZ/OZ	47.8321	2.6299	4.2943	0.0469	8.1894	0.1656	13.65	21.6414	0.5285	0.0131	98.9912	74.8187	-0.012047
Cima5_cpx23	micro	SZ/OZ	51.146	1.4334	12.6718	0.0104	5.4559	0.1127	8.7249	16.6246	2.6506	-0.0005	98.8298	74.0305	0.45713
Cima5_cpx23	micro	SZ/OZ	49.4131	2.0733	3.1795	0.0626	7.9333	0.1855	14.4132	21.8024	0.4941	0.0002	99.5573	76.4074	-0.0187465
Cima5_cpx23	micro	SZ/OZ	48.1931	2.6104	4.4375	0.0163	8.2057	0.173	13.7606	21.6703	0.5321	0.0094	99.6084	74.9332	-0.00544759
Cima5_cpx23	micro	SZ/OZ	49.2255	2.3277	4.6483	0.019	7.9554	0.1599	12.966	21.1248	0.6409	0.0179	99.0852	74.394	0.055993
Cima5_cpx23	micro	SZ/OZ	48.3256	2.4151	4.316	0.0398	8.2871	0.1717	13.8941	21.7877	0.5923	-0.0005	99.8292	74.9291	-0.0124617
Cima5_cpx23	micro	SZ/OZ	48.6412	2.4325	3.7755	0.0563	7.9966	0.1649	14.0325	21.9019	0.5347	0.0155	99.5516	75.7758	-0.018722
Cima5_cpx24	micro	SZ/OZ	54.6078	0.1758	27.3982	0.0017	0.5426	0.0046	0.0475	10.6178	5.66	-0.0079	99.0482	13.4986	1.17561
Cima5_cpx24	micro	SZ/OZ	49.766	2.0535	2.5746	-0.0075	8.5381	0.2147	14.2011	21.8022	0.4911	0.01	99.6439	74.7788	-0.0282376
Cima5_cpx24	micro	SZ/OZ	47.6114	2.8863	4.9837	0.0559	8.1629	0.1756	13.2412	21.4431	0.6704	0.0036	99.2341	74.3035	0.00619371
Cima5_cpx24	micro	SZ/OZ	49.5698	1.9921	2.9663	0.035	7.961	0.1907	14.4316	21.6784	0.4861	-0.0025	99.3086	76.3675	-0.0172381
Cima5_cpx24	micro	SZ/OZ	48.103	2.4997	4.1446	0.062	8.2475	0.1803	13.9417	21.622	0.5156	0.0214	99.338	75.083	-0.0171862
Cima5_cpx24	micro	SZ/OZ	48.731	2.2977	3.6198	0.0304	8.0944	0.1871	14.0944	21.9058	0.5109	0.0092	99.4807	75.6332	-0.0209637
Cima5_cpx24	micro	SZ/OZ	48.6555	2.2961	3.912	0.0449	8.1119	0.1878	14.083	21.7652	0.5234	0.0049	99.5847	75.5785	-0.0136386
Cima5_cpx24	micro	SZ/OZ	48.2581	2.4656	3.9629	0.0514	8.1639	0.1768	13.9699	21.6602	0.5472	0.0135	99.2695	75.3107	-0.0188264
Cima5_cpx24	micro	SZ/OZ	46.8927	3.4163	4.7993	0.0064	8.793	0.186	12.7846	21.6624	0.6077	-0.0127	99.1356	72.1589	-0.0174547
Cima5_cpx25	pheno	NS	48.654	2.4494	4.1688	0.0463	8.1698	0.1615	13.9414	22.087	0.5452	0.0153	100.239	75.2593	-0.0140084
Cima5_cpx25	pheno	NS	49.293	2.0351	3.943	0.0896	8.2765	0.1843	14.1396	21.3261	0.5467	0.0228	99.8566	75.2805	0.00551905
Cima5_cpx25	pheno	verm	42.4524	4.8692	4.8406	0.0962	16.5818	0.2328	11.9239	18.6775	0.511	0.0026	100.188	56.176	-0.160182
Cima5_cpx25	pheno	verm	48.1692	2.5619	4.1102	0.0481	8.4354	0.193	13.7047	21.6136	0.561	0.0141	99.4111	74.3334	-0.0152135
Cima5_cpx25	pheno	ns	48.9033	2.1984	3.4876	0.0215	8.4926	0.1893	14.3026	21.6095	0.4933	0.0206	99.7187	75.0132	-0.0247586
Cima5_cpx25	pheno	ns	50.0459	1.9567	2.3155	-0.005	8.616	0.2053	14.4148	21.7492	0.5027	0.0227	99.8238	74.8891	-0.033864
Cima5_cpx25	pheno	ns	58.7301	0.3053	25.1353	-0.0032	0.6885	0.001	0.0222	7.3091	7.3663	0.0055	99.56	5.43538	1.19177
Cima5_cpx26	micro	SZ/OZ	49.3747	2.2301	3.1896	0.0484	8.5156	0.2048	14.6522	21.5945	0.4748	0.0141	100.299	75.413	-0.0324316
Cima5_cpx26	micro	SZ/OZ	47.3682	3.0887	5.2207	0.0707	8.5908	0.1541	13.2427	21.4822	0.5965	0.0102	99.8247	73.3181	-0.000921252
Cima5_cpx26	micro	SZ/OZ	46.1527	3.7962	5.5035	0.034	9.0225	0.1738	12.8858	21.5831	0.6507	0.0082	99.8105	71.7982	-0.0278669
Cima5_cpx26	micro	SZ/OZ	47.1085	3.4442	5.2422	0.0174	8.9865	0.2026	12.9672	21.6674	0.6479	0.0133	100.297	72.0062	-0.0142878
Cima5_cpx26	micro	SZ/OZ	55.4552	0.5444	24.1309	0.001	1.5377	0.0285	1.2925	10.4726	5.7541	-0.0165	99.2003	59.9735	1.06602
Cima5_cpx26	micro	SZ/OZ	47.3478	3.1895	4.1502	0.0213	9.4508	0.2228	12.6	21.3723	0.6481	0.0042	99.007	70.3843	-0.0219751
Cima5_cpx27	micro	SZ/OZ	47.8022	3.0044	4.6973	0.0309	8.6836	0.1699	13.4372	21.4926	0.5955	0.0088	99.9224	73.3931	-0.00982038
Cima5_cpx27	micro	SZ/OZ	46.9473	3.0731	6.3662	0.0058	8.5814	0.1656	12.4143	20.8017	0.5499	0.0041	98.9094	72.0576	0.0565937
Cima5_cpx27	micro	SZ/OZ	47.742	3.2313	4.4637	0.0165	8.8132	0.2039	13.3702	21.6911	0.6343	-0.0049	100.162	73.0044	-0.0248198
Cima5_cpx27	micro	SZ/OZ	48.201	3.2508	4.3799	-0.0097	8.8246	0.1997	13.6427	21.3874	0.5906	0.0174	100.484	73.375	-0.0183755
Cima5_cpx27	micro	SZ/OZ	52.2527	0.174	28.9158	0.0029	0.6726	0.0056	0.0767	12.2163	4.5982	-0.0089	98.906	16.8937	1.17453
Cima5_cpx27	micro	SZ/OZ	53.9293	0.1684	27.8263	-0.0098	0.6244	0.0013	0.0884	10.5244	5.4583	0.0171	98.6281	20.1515	1.18428
Cima5_cpx28	micro	SZ/OZ	47.1515	3.7714	4.2764	0.0018	11.4561	0.2777	11.2842	20.0214	0.9835	-0.0073	99.2167	63.7135	-0.010662
Cima5_cpx28	micro	SZ/OZ	48.2468	3.411	3.472	-0.006	10.3108	0.2603	11.9663	21.1985	0.8258	-0.0116	99.6739	67.4141	-0.0216137
Cima5_cpx28	micro	SZ/OZ	46.56	3.9298	4.4772	-0.0001	9.696	0.227	12.2164	21.401	0.7294	-0.0068	99.2297	69.1925	-0.0362303
Cima5_cpx28	micro	SZ/OZ	46.4047	3.9684	4.665	-0.0051	9.6824	0.2194	12.1856	21.4129	0.7529	0.0064	99.2926	69.1686	-0.035491
Cima5_cpx28	micro	SZ/OZ	46.9784	3.6768	4.563	0.0009	9.5929	0.2168	12.2519	21.407	0.7372	0.0024	99.4272	69.4815	-0.0224782
Cima5_cpx28	micro	SZ/OZ	46.7251	3.4674	4.5289	0.008	9.6708	0.2034	12.1701	21.3066	0.7233	-0.0034	98.8	69.1671	-0.0213869
Cima5_cpx29	micro	SZ/OZ	54.0345	0.2131	27.6055	-0.0003	0.6972	0.0024	0.0399	10.4826	5.4819	-0.0125	98.5442	9.25721	1.18296
Cima5_cpx29	micro	SZ/OZ	46.2486	3.7832	5.1687	0.0173	9.2524	0.1973	12.6099	21.2093	0.7089	0.0065	99.2021	70.8409	-0.0239832
Cima5_cpx29	micro	SZ/OZ	45.8289	3.8361	5.626	0.0273	8.9907	0.1931	12.4196	21.283	0.6882	0.0137	98.9066	71.1187	-0.0139933
Cima5_cpx29	micro	SZ/OZ	52.0596	1.5575	15.0336	0.0044	5.4539	0.1145	7.4821	14.9054	3.1854	0.0057	99.802	70.9767	0.568562
Cima5_cpx29	micro	SZ/OZ	49.7732	1.8573	2.488	0.0255	8.0994	0.1954	14.7666	21.6125	0.4742	0.0031	99.2952	76.4705	-0.0318367
Cima5_cpx29	micro	SZ/OZ	49.8542	2.0184	3.0878	0.0714	8.0841	0.1648	14.7251	21.9157	0.496	0.0143	100.432	76.4538	-0.0248991
Cima5_cpx29	micro	SZ/OZ	47.9647	2.6411	4.4705	0.0804	8.2323	0.1646	13.676	21.5295	0.5781	0.0129	99.3501	74.7561	-0.00714455
Cima5_cpx29	micro	SZ/OZ	47.1559	2.8621	4.7364	0.0253	8.7706	0.1768	13.5171	21.5043	0.5619	-0.0012	99.3093	73.3142	-0.0216571
Cima5_cpx29	micro	SZ/OZ	47.6162	2.7156	4.8476	0.0712	8.3091	0.1503	13.432	21.5623	0.5439	0.0161	99.2644	74.2377	5.51404e-05
Cima5_cpx30	micro	verm	52.5017	0.5649	0.3406	-0.0016	9.0633	0.2532	14.947	21.9101	0.4404	-0.0036	100.016	74.6181	-0.0350691
Cima5_cpx30	micro	verm	52.7646	0.4162	0.1563	0.0052	9.1611	0.2645	14.5063	22.1741	0.4174	0.0042	99.8701	73.8403	-0.0264103
Cima5_cpx30	micro	verm	49.3717	2.0606	3.2722	0.0386	8.3322	0.1969	14.06	22.0392	0.5705	0.0177	99.9597	75.0499	-0.0211271
Cima5_cpx30	micro	verm	49.2159	2.1093	3.5313	0.0335	8.2439	0.171	14.2124	21.7338	0.5332	0.0227	99.807	75.4491	-0.0141104
Cima5_cpx30	micro	verm	50.3786	1.7442	6.8766	0.0367	8.2478	0.2037	10.4442	18.858	1.8059	0.015	98.6107	69.2997	0.206071
Cima5_cpx30	micro	verm	52.2614	0.4822	0.2022	0.0059	9.7472	0.2839	14.3196	22.1394	0.456	0.0148	99.9125	72.3666	-0.0408258
Cima5_cpx31	micro	SZ/OZ	47.7103	2.8339	4.7045	0.0583	8.3294	0.1732	13.5164	21.7508	0.5819	0.0082	99.6668	74.3107	-0.0108084
Cima5_cpx31	micro	SZ/OZ	48.1601	2.7238	4.4809	0.1017	8.1424	0.1684	13.6627	21.8481	0.5625	0.0113	99.8618	74.9445	-0.00879928
Cima5_cpx31	micro	SZ/OZ	47.3968	2.9148	4.9071	0.0925	8.2982	0.1752	13.453	21.7604	0.5498	0.0149	99.5627	74.2926	-0.0108198
Cima5_cpx31	micro	SZ/OZ	46.7704	2.3915	4.736	0.0632	7.9508	0.161	13.0155	23.1022	0.5031	0.0157	98.7095	74.4775	-0.0261382
Cima5_cpx31	micro	SZ/OZ	47.8123	2.9607	4.7588	0.0425	8.2936	0.1641	13.4852	21.7629	0.5935	0.0033	99.877	74.3488	-0.00823909
Cima5_cpx32	pheno	verm	48.5614	2.3672	4.1369	0.0853	7.9993	0.1733	14.0059	21.9779	0.5253	0.01	99.8426	75.7348	-0.0122784
Cima5_cpx32	pheno	verm	47.603	2.6169	5.3333	0.0348	8.3718	0.1652	13.5553	21.458	0.6273	0.007	99.7725	74.2686	0.0070851
Cima5_cpx32	pheno	verm	54.5885	0.1976	27.638	-0.0026	0.677	0.0044	0.0457	10.3702	5.6332	0.0058	99.1577	10.7407	1.18284
Cima5_cpx32	pheno	verm	47.5708	2.6987	4.7167	0.0296	8.3295	0.1647	13.76	21.8692	0.5353	0.0169	99.6914	74.65	-0.0183294
Cima5_cpx32	pheno	verm	43.7427	3.2309	10.3967	-0.0054	8.4427	0.1504	12.4815	19.6764	0.9555	0.0088	99.0802	72.4923	0.0916795
Cima5_cpx32	pheno	verm	44.6806	2.9241	9.7982	-0.0028	8.5294	0.1604	12.5632	19.895	0.8986	0.0078	99.4544	72.4186	0.0938316
Cima5_cpx32	pheno	verm	44.3472	2.8812	10.1471	0.0048	8.5295	0.142	12.6228	19.7287	0.955	-0.0089	99.3494	72.5128	0.0959903
Cima5_cpx32	pheno	verm	47.0458	2.6402	5.4596	0.0234	8.2798	0.1608	13.6387	21.6269	0.5477	0.0049	99.4279	74.5957	-0.0020781
Cima5_cpx32	pheno	verm	48.8579	2.4245	3.4933	0.0293	8.7957	0.2077	14.0896	21.4965	0.5243	0.023	99.9419	74.063	-0.026708
Cima5_cpx33	micro	SZ/OZ	50.0112	2.0101	2.5125	0.0329	8.634	0.2107	14.7492	21.3583	0.4741	0.0059	99.9989	75.279	-0.0320036
Cima5_cpx33	micro	SZ/OZ	48.5346	2.419	3.7262	0.0306	8.4543	0.2037	13.8878	21.603	0.5658	0.0144	99.4391	74.5434	-0.0200921
Cima5_cpx33	micro	SZ/OZ	47.8426	2.9419	4.712	0.0846	8.3724	0.1617	13.5465	21.903	0.5518	-0.0007	100.116	74.2549	-0.0132177
Cima5_cpx33	micro	SZ/OZ	46.604	3.3804	5.3235	0.0572	8.6865	0.1724	13.2045	21.5918	0.6233	0.0087	99.6521	73.044	-0.0206947
Cima5_cpx33	micro	SZ/OZ	46.5875	3.3416	5.0508	0.0227	8.9289	0.1662	12.909	21.6568	0.6545	-0.0093	99.3088	72.0451	-0.023641
Cima5_cpx33	micro	SZ/OZ	47.4118	3.1594	4.5117	0.0149	8.6676	0.1881	13.1516	21.7921	0.6412	0.0185	99.5568	73.0079	-0.023051
Cima5_cpx34	micro	SZ/OZ	47.0394	2.9059	4.5857	0.045	8.4916	0.1866	13.4614	21.8119	0.5505	0.0151	99.093	73.8622	-0.0284032
Cima5_cpx34	micro	SZ/OZ	47.0703	3.0143	4.5403	0.033	8.6433	0.1711	13.1836	21.7991	0.5995	0.0194	99.0737	73.111	-0.0260994
Cima5_cpx34	micro	SZ/OZ	49.1789	2.0283	2.9581	0.0119	8.347	0.2078	14.3421	21.5767	0.4723	0.0257	99.1488	75.3871	-0.026691
Cima5_cpx34	micro	SZ/OZ	46.9244	3.4733	4.8402	0.0065	8.8142	0.1829	12.9119	21.5945	0.6419	0.0076	99.3975	72.3093	-0.0206999
Cima5_cpx34	micro	SZ/OZ	46.7647	3.2384	4.7334	0.0107	8.8241	0.1849	13.1425	21.6276	0.6286	-0.0033	99.1515	72.64	-0.0295233
Cima5_cpx35	micro	SZ/OZ	50.0134	1.8285	2.9224	0.0685	7.9426	0.1999	14.8539	21.5474	0.5046	0.0112	99.8924	76.9252	-0.017827
Cima5_cpx35	micro	SZ/OZ	49.7397	1.8819	2.8386	0.0589	8.0205	0.1907	14.814	21.8258	0.4713	0.0033	99.8447	76.7035	-0.029589
Cima5_cpx35	micro	SZ/OZ	50.1386	1.7819	2.6296	0.0636	7.8586	0.1821	14.8439	21.8806	0.4365	0.0157	99.8311	77.1015	-0.0236904
Cima5_cpx35	micro	SZ/OZ	50.433	1.8175	2.6106	0.061	7.7809	0.1919	14.8874	22.1309	0.418	0.0154	100.347	77.3278	-0.0234694
Cima5_cpx35	micro	SZ/OZ	50.253	1.7814	2.7998	0.0772	7.8833	0.1793	14.7587	21.8537	0.4869	0.0139	100.087	76.9441	-0.0171511
Cima5_cpx35	micro	SZ/OZ	50.1247	1.7904	2.6931	0.0669	7.9851	0.1756	14.896	21.684	0.4776	0.0146	99.9079	76.8807	-0.023497
Cima5_cpx35	micro	SZ/OZ	47.4738	3.2478	4.3814	0.0006	9.8256	0.2377	12.4844	21.0961	0.7841	-0.0067	99.5248	69.3718	-0.0167939
Cima5_cpx36	pheno	verm	53.1299	0.4471	2.1758	0.3452	9.1734	0.2391	19.1055	14.8432	0.5383	0.0221	100.02	78.7804	0.0329665
Cima5_cpx36	pheno	verm	47.8758	2.5036	4.2677	0.0765	8.1419	0.1631	13.7919	21.7656	0.5528	0.0027	99.1416	75.122	-0.0168032
Cima5_cpx37	pheno	verm	51.0649	0.5293	4.0202	0.3185	9.2255	0.2111	16.9696	16.6849	0.8964	0.044	99.9645	76.6298	0.0436017
Cima5_cpx37	pheno	verm	52.383	0.5951	1.2556	0.4838	7.9154	0.2385	17.4996	19.0319	0.4512	0.0469	99.901	79.7612	-0.0210505
Cima5_cpx37	pheno	verm	50.5694	0.7958	4.16	0.3528	8.2589	0.2237	14.9242	19.9588	0.8591	0.0479	100.151	76.3102	0.0409892
Cima5_cpx37	pheno	verm	52.8061	1.3509	7.7825	0.2061	6.4764	0.1582	12.6033	17.3979	1.6735	0.035	100.49	77.6236	0.268643
Cima5_cpx37	pheno	verm	47.6459	2.8321	4.6956	0.0525	8.4132	0.1794	13.6342	21.6321	0.5594	0.0112	99.6557	74.2853	-0.0136716
Cima5_cpx38	pheno	verm	47.9682	3.0395	4.2404	0.0165	8.8125	0.1978	13.1767	21.6122	0.6205	0.0225	99.7065	72.7177	-0.0157886
Cima5_cpx38	pheno	verm	48.3341	1.9543	5.8103	0.2179	8.0955	0.1714	13.7839	21.0756	0.6947	0.0183	100.156	75.2178	0.0404423
Cima5_cpx38	pheno	verm	49.2122	1.9885	3.8054	0.2032	7.9227	0.1992	14.4524	21.6743	0.5114	0.0116	99.9808	76.4804	-0.00893806
Cima5_cpx38	pheno	verm	49.022	2.1689	3.8901	0.2022	7.8152	0.1632	14.1762	21.9266	0.5036	0.0306	99.8986	76.3789	-0.0082986
Cima5_cpx38	pheno	verm	47.9892	1.7899	6.7508	0.2256	8.2115	0.1663	13.5317	20.1437	0.88	0.0279	99.7165	74.6034	0.0741062
Cima5_cpx38	pheno	verm	49.227	1.9889	3.9985	0.178	7.9379	0.1562	14.2867	21.6616	0.4957	-0.0035	99.927	76.2376	0.00196481
Cima5_cpx38	pheno	verm	48.6322	2.2898	4.7676	0.213	8.1914	0.1917	13.7744	21.6757	0.5896	-0.0107	100.315	74.9847	0.00928388
Cima5_cpx38	pheno	verm	49.1292	2.2127	3.7428	0.1804	8.1692	0.1884	14.2281	21.6667	0.5135	0.0025	100.034	75.6377	-0.0118896
Cima5_cpx39	micro	verm	49.6767	2.0706	3.475	0.0764	7.9211	0.199	14.494	21.7296	0.5173	0.0038	100.163	76.5357	-0.00912299
Cima5_cpx39	micro	verm	48.2702	2.0932	5.8592	0.1523	8.1125	0.1802	13.8123	20.6872	0.5176	0.0153	99.6998	75.2171	0.0523081
Cima5_cpx39	micro	verm	48.9587	1.8679	3.9983	0.1252	8.1939	0.1866	14.6451	21.2424	0.446	-0.0017	99.6624	76.1112	-0.00490525
Cima5_cpx39	micro	verm	55.0032	0.2458	26.8207	-0.001	0.704	-0.0009	0.056	9.8341	6.087	-0.0026	98.7462	12.4188	1.16903
Cima5_cpx39	micro	verm	47.133	2.6441	5.6533	0.1385	8.5393	0.1865	13.8031	21.1159	0.5443	-0.0027	99.7553	74.2362	0.00347342
Cima5_cpx39	micro	verm	48.2848	2.1471	4.3814	0.1483	7.8583	0.1725	14.1281	21.5537	0.4957	0.0137	99.1835	76.2179	-0.0016811
Cima5_cpx39	micro	verm	48.7319	2.2084	4.6097	0.1387	8.2929	0.2048	13.4643	21.6308	0.9446	0.0124	100.238	74.3208	0.00499768
Cima5_cpx39	micro	verm	46.0536	2.9507	5.753	0.2307	8.2771	0.167	13.0979	21.6959	0.5383	0.0218	98.7859	73.8276	-0.0079607
Cima5_cpx39	micro	verm	46.5651	2.8696	5.9805	0.2726	8.3524	0.1702	13.0697	21.5582	0.5654	0.0153	99.4191	73.6104	0.00869346
Cima5_cpx40	pheno	ns	47.5311	2.6896	4.6216	0.0743	8.1132	0.1679	13.7435	21.8081	0.5219	-0.0022	99.2691	75.1223	-0.0159952
Cima5_cpx40	pheno	ns	48.5578	2.1873	3.7611	0.1855	7.9697	0.1679	14.2582	21.4776	0.5192	0.0156	99.0999	76.1288	-0.0159983
Cima5_cpx40	pheno	ns	47.8395	2.4934	4.4824	0.3067	8.3001	0.1959	13.8907	21.506	0.549	0.0233	99.5869	74.895	-0.0166744
Cima5_cpx40	pheno	ns	47.6469	2.5846	4.7616	0.3011	8.2845	0.1613	13.7052	21.6394	0.5914	0.0157	99.6918	74.677	-0.0133835
Cima5_cpx40	pheno	ns	47.0527	2.6742	5.1171	0.4032	8.3028	0.1501	13.3528	21.6175	0.5706	0.0021	99.2431	74.139	-0.00840496
Cima5_cpx40	pheno	ns	47.9245	2.6078	4.6805	0.3157	8.3074	0.1748	13.6494	21.6809	0.5741	0.0132	99.9282	74.5474	-0.00972396
Cima5_cpx40	pheno	ns	47.9532	2.6412	4.7135	0.216	8.2121	0.1484	13.6315	21.6914	0.5743	0.0115	99.7931	74.741	-0.00526338
Cima5_cpx40	pheno	ns	49.0949	2.1312	3.4703	0.0753	8.0896	0.1901	14.304	21.6856	0.4885	0.0227	99.5522	75.9151	-0.0165926
Cima5_cpx40	pheno	ns	49.009	2.1947	3.741	0.0481	8.0187	0.1747	14.0783	21.5365	0.5034	0.0287	99.3331	75.785	-0.0027496
Cima5_cpx41	pheno	verm	48.1666	2.1279	4.6789	0.1313	8.037	0.169	14.1319	21.5253	0.5287	0.0075	99.5041	75.8129	-0.00014167
Cima5_cpx41	pheno	verm	47.4696	2.2899	5.105	0.2512	8.1144	0.1708	13.1219	21.6631	0.5997	0.008	98.7936	74.2444	0.0139361
Cima5_cpx41	pheno	verm	47.8593	2.3827	4.7112	0.2636	8.2673	0.1628	13.5082	21.9437	0.5646	0.009	99.6724	74.4418	-0.00647486
Cima5_cpx41	pheno	verm	48.3192	2.4054	4.2651	0.1799	8.197	0.1744	13.7894	21.9528	0.7788	0.0074	100.069	74.9923	-0.0211583
Cima5_cpx41	pheno	verm	47.9573	2.5623	4.6537	0.1372	8.2627	0.1726	13.636	21.8606	0.5466	0.0047	99.7937	74.6311	-0.00784301
Cima5_cpx41	pheno	verm	49.4977	1.887	3.174	0.0699	7.9052	0.1696	14.6616	21.6485	0.5354	0.0073	99.5561	76.7773	-0.019431
Cima5_cpx41	pheno	verm	48.8911	2.2472	3.5766	0.045	8.2311	0.1721	14.2504	21.7144	0.5369	0.0132	99.6781	75.5273	-0.0217527
Cima5_cpx1	micro	SZ/OZ	48.5773	2.7788	3.614	0.0053	9.3089	0.2253	13.0016	21.4487	0.6615	0.0151	99.6364	71.3444	-0.0157631
Cima5_cpx1	micro	SZ/OZ	49.9362	1.9737	2.3945	0.0246	8.7815	0.2023	14.507	21.4565	0.4955	0.0161	99.7878	74.6504	-0.0337582
Cima5_cpx1	micro	SZ/OZ	49.2628	1.9751	2.5845	0.0254	8.3269	0.2036	14.5749	21.1828	0.4651	0.0043	98.6053	75.729	-0.0305976
Cima5_cpx1	micro	SZ/OZ	50.0853	1.8225	2.7644	0.0162	8.1197	0.1924	14.8059	21.7683	0.5004	0.0105	100.086	76.4732	-0.0245984
Cima5_cpx1	micro	SZ/OZ	49.4081	2.0004	3.0866	0.0644	8.1041	0.1758	14.6528	21.6902	0.478	0.0024	99.6628	76.3205	-0.026242
Cima5_cpx1	micro	SZ/OZ	46.814	3.1334	4.7223	0.0906	9.3118	0.1981	13.5333	21.3893	0.5774	0.0169	99.787	72.1505	-0.0408475
Cima5_cpx1	micro	SZ/OZ	47.8827	2.7438	4.4186	0.0724	8.3633	0.1646	13.6879	21.7871	0.5804	0.0105	99.7112	74.4736	-0.0186857
Cima5_cpx1	micro	SZ/OZ	46.9194	3.2433	4.9457	0.0436	8.6456	0.192	13.1568	21.5525	0.6136	0.0077	99.3204	73.0657	-0.0182597
Cima5_cpx1	micro	SZ/OZ	48.1714	3.0252	4.1578	0.0093	9.158	0.1951	12.9014	21.3948	0.6408	-0.004	99.6497	71.5201	-0.00713172
Cima5_cpx2	micro	SZ/OZ	50.6037	1.8173	2.128	0.0059	8.8134	0.2312	14.3473	21.4269	0.4666	0.0054	99.8458	74.3713	-0.0194758
Cima5_cpx2	micro	SZ/OZ	50.369	1.9746	2.3387	0.0154	8.5235	0.2128	14.5293	21.3107	0.4795	0.0028	99.7562	75.2392	-0.0198925
Cima5_cpx2	micro	SZ/OZ	50.0862	1.9264	2.5164	0.025	8.2461	0.192	14.7551	21.4954	0.4737	0.0061	99.7226	76.1318	-0.0258427
Cima5_cpx2	micro	SZ/OZ	48.6878	2.3439	3.7798	0.0327	8.6722	0.1979	14.2828	21.1232	0.5118	0.0133	99.6453	74.5926	-0.017787
Cima5_cpx2	micro	SZ/OZ	48.8232	2.3687	3.0796	0.0245	9.2929	0.2266	14.4908	20.4248	0.5024	0.0157	99.2491	73.5427	-0.0327311
Cima5_cpx2	micro	SZ/OZ	46.1404	3.4223	5.3125	0.0339	9.267	0.1862	12.3988	21.2558	0.5717	0.0189	98.6074	70.4581	-0.0084349
Cima5_cpx2	micro	SZ/OZ	48.3477	2.7143	4.4624	0.0936	8.1385	0.1919	13.6505	21.6472	0.4909	0.0164	99.7533	74.9367	0.000985259
Cima5_cpx2	micro	SZ/OZ	47.4262	3.039	4.6808	0.0318	8.5303	0.1839	13.2568	21.6071	0.5701	0.013	99.339	73.4769	-0.0120568
Cima5_cpx2	micro	SZ/OZ	47.2805	3.2768	4.6765	0.0135	8.8113	0.1686	12.8919	21.2146	0.6178	-0.0014	98.9501	72.2848	-0.00551091
Cima5_cpx2	micro	SZ/OZ	49.8048	2.1008	2.6487	0.0123	8.7096	0.2298	14.163	21.2754	0.4717	-0.0091	99.407	74.3507	-0.0172434
Cima5_cpx3	micro	SZ/OZ	47.8045	3.4556	5.9388	0.0106	8.8203	0.1772	12.8237	20.6804	0.6706	0.0035	100.385	72.1579	0.0399163
Cima5_cpx3	micro	SZ/OZ	49.9925	2.1299	2.5515	-0.0067	9.0696	0.2336	14.0597	21.2318	0.4807	-0.0108	99.7317	73.4281	-0.0181954
Cima5_cpx3	micro	SZ/OZ	49.5657	2.1698	2.2756	-0.0005	9.1105	0.2439	14.0617	21.3018	0.5178	0.0097	99.2559	73.343	-0.0369499
Cima5_cpx3	micro	SZ/OZ	49.47	2.1838	2.2691	0.0093	9.3281	0.2583	13.672	21.3584	0.4739	0.0114	99.0344	72.32	-0.0317473
Cima5_cpx3	micro	SZ/OZ	49.3425	2.3176	2.367	0.0063	9.4048	0.235	13.664	21.3975	0.5175	0.0038	99.2559	72.144	-0.0365655
Cima5_cpx4	micro	SZ/OZ	50.4482	1.8786	2.2595	0.0089	8.6958	0.2024	14.4279	21.5449	0.4879	-0.0004	99.9536	74.7325	-0.0233031
Cima5_cpx4	micro	SZ/OZ	50.0889	1.9678	2.5387	0.0345	8.4564	0.2042	14.7796	21.389	0.4565	0.0129	99.9287	75.7017	-0.0275162
Cima5_cpx4	micro	SZ/OZ	46.8876	3.3415	4.8545	0.0418	8.8869	0.1783	13.0037	21.5263	0.5546	0.0151	99.2902	72.2867	-0.0190906
Cima5_cpx4	micro	SZ/OZ	47.5502	3.1981	4.6765	0.0239	8.7398	0.1849	13.1522	21.5487	0.6053	0.0067	99.6863	72.845	-0.0122593
Cima5_cpx4	micro	SZ/OZ	49.3047	2.3527	2.8833	0.0077	8.785	0.2128	14.1251	21.4363	0.4915	0.0284	99.6276	74.1346	-0.0292103
Cima5_cpx4	micro	SZ/OZ	49.9747	2.1939	2.368	0.0075	9.08	0.2219	14.0455	21.4363	0.4949	0.0256	99.8483	73.386	-0.0283933
Cima5_cpx4	micro	SZ/OZ	49.411	2.5305	2.6599	0.0078	9.593	0.2399	13.2488	21.3844	0.6212	-0.0021	99.6945	71.1143	-0.0264028
Cima5_cpx4	micro	SZ/OZ	47.588	3.6443	3.6766	0.0022	10.3306	0.2619	11.8599	21.0731	0.9791	-0.0065	99.4091	67.1753	-0.0332859
Cima5_cpx4	micro	SZ/OZ	46.0704	5.0511	4.3375	0.0059	11.144	0.2601	10.508	20.7924	1.3211	-0.0068	99.4839	62.6985	-0.0487173
Cima5_cpx5	micro	SZ/OZ	51.0246	1.4855	1.8767	0.0012	9.3309	0.2635	13.8529	21.2861	0.5841	0.0131	99.7185	72.5763	-0.00867202
Cima5_cpx5	micro	SZ/OZ	50.3548	1.767	2.0549	-0.0108	8.7119	0.2185	14.2435	21.4981	0.4575	0.0041	99.2996	74.4536	-0.0213046
Cima5_cpx5	micro	SZ/OZ	50.0473	1.8951	2.4008	0.0148	8.4776	0.2185	14.5228	21.5113	0.4823	0.019	99.5895	75.3313	-0.0269757
Cima5_cpx5	micro	SZ/OZ	49.843	1.8956	2.6666	0.0492	8.1699	0.1982	14.6803	21.5377	0.4683	0.0242	99.5331	76.208	-0.024814
Cima5_cpx5	micro	SZ/OZ	46.8061	3.3389	5.2056	0.0791	8.6286	0.1795	12.9936	21.5478	0.6164	0.0155	99.4112	72.8583	-0.0115964
Cima5_cpx5	micro	SZ/OZ	48.7945	2.2912	3.5524	0.0507	8.2454	0.182	14.1634	21.8347	0.5155	0.0043	99.634	75.3817	-0.0242956
Cima5_cpx5	micro	SZ/OZ	46.8047	2.8604	5.6275	0.0234	8.6805	0.1922	13.1871	20.5374	0.643	0.0162	98.5724	73.0317	0.0183605
Cima5_cpx5	micro	SZ/OZ	47.1981	3.1224	4.9367	0.1012	8.6439	0.1945	13.1584	21.7031	0.5622	-0.0015	99.6189	73.072	-0.0134856
Cima5_cpx5	micro	SZ/OZ	46.5315	3.422	5.1201	0.0279	8.831	0.1808	12.9814	21.5682	0.6418	0.0096	99.3142	72.3786	-0.0231531
Cima5_cpx6	micro	SZ/OZ	49.411	2.0969	2.3943	-0.0027	10.0434	0.2488	12.8906	21.2212	0.7023	-0.0004	99.0053	69.5858	-0.0229393
Cima5_cpx6	micro	SZ/OZ	47.9532	2.9258	4.4861	0.0136	8.5596	0.2063	13.0898	21.3103	0.618	-0.0035	99.1592	73.1618	0.00381762
Cima5_cpx6	micro	SZ/OZ	47.1295	3.2494	4.7411	0.0333	8.6466	0.1679	13.2775	21.5875	0.6265	0.0192	99.4785	73.2428	-0.0230786
Cima5_cpx6	micro	SZ/OZ	47.8075	2.9248	4.6049	0.0897	8.328	0.1606	13.4442	21.8903	0.5628	0.0215	99.8344	74.2116	-0.0130177
Cima5_cpx6	micro	SZ/OZ	45.8641	3.6505	5.3499	0.0349	9.115	0.18	12.9371	21.5125	0.6374	-0.0005	99.2809	71.672	-0.0357666
Cima5_cpx6	micro	SZ/OZ	47.8508	2.8743	4.3035	0.0586	8.6964	0.1706	13.4749	21.8091	0.5928	0.021	99.8521	73.4191	-0.0238527
Cima5_cpx6	micro	SZ/OZ	48.5106	2.4033	3.41	0.0185	9.4731	0.2291	14.3984	20.6246	0.4897	0.0113	99.5685	73.0415	-0.0353766
Cima5_cpx6	micro	SZ/OZ	49.6633	1.8423	2.7946	0.0545	7.9253	0.1672	14.7399	21.7221	0.481	0.0179	99.408	76.827	-0.0260602
Cima5_cpx6	micro	SZ/OZ	50.5999	1.7348	2.4253	0.0102	8.4358	0.2108	14.5307	21.457	0.4844	0.0188	99.9077	75.4332	-0.0121976
Cima5_cpx7	micro	SZ/OZ	50.0674	2.0463	2.6069	0.0282	8.3537	0.2117	14.5068	21.5187	0.4579	-0.0072	99.7904	75.5836	-0.0207636
Cima5_cpx7	micro	SZ/OZ	50.1596	1.9266	2.6308	0.0409	8.1977	0.1771	14.7487	21.4916	0.4608	0.0116	99.8454	76.2307	-0.020576
Cima5_cpx7	micro	SZ/OZ	50.4128	1.8224	2.936	0.0487	7.9621	0.1688	14.788	21.6366	0.4783	0.0154	100.269	76.8025	-0.00864458
Cima5_cpx7	micro	SZ/OZ	48.8232	2.5507	3.9069	0.0121	9.1592	0.233	13.4977	21.1418	0.7383	0.012	100.075	72.4288	-0.00958438
Cima5_cpx7	micro	SZ/OZ	47.8664	3.028	4.4238	0.0212	9.102	0.2031	13.6204	21.1704	0.6266	0.0082	100.07	72.7335	-0.0215782
Cima5_cpx7	micro	SZ/OZ	45.882	3.6236	5.2216	0.0236	9.2709	0.2023	12.8426	21.2004	0.6718	0.0104	98.9491	71.1762	-0.0330928
Cima5_cpx7	micro	SZ/OZ	46.806	3.3653	4.7441	0.0138	10.041	0.2372	13.0726	20.5005	0.6138	0.0088	99.4031	69.8868	-0.0253454
Cima5_cpx7	micro	SZ/OZ	48.921	2.3503	3.6048	-0.0014	8.7661	0.2191	14.2219	21.4374	0.5285	0.0134	100.061	74.3065	-0.0237531
Cima5_cpx7	micro	SZ/OZ	50.0112	1.7778	4.0224	0.0334	7.7684	0.1984	14.0267	20.9756	0.4311	-0.0039	99.241	76.2958	0.0475013
Cima5_cpx7	micro	SZ/OZ	50.4053	1.9825	2.3515	0.0077	8.6747	0.2254	14.4789	21.6129	0.5041	-0.0078	100.235	74.8448	-0.0266936
Cima5_cpx8	micro	SZ/OZ	48.4035	2.7409	3.5918	0.0012	9.8522	0.2205	12.5025	21.4414	0.7232	-0.0043	99.4728	69.3451	-0.0151757
Cima5_cpx8	micro	SZ/OZ	47.5001	3.3443	4.3722	0.006	9.6038	0.219	12.3513	21.3229	0.7451	0.008	99.4727	69.6286	-0.0138758
Cima5_cpx8	micro	SZ/OZ	47.4001	3.3393	4.4587	0.0017	9.3449	0.2276	12.4195	21.379	0.7105	0.0041	99.2854	70.3184	-0.0115479
Cima5_cpx8	micro	SZ/OZ	47.487	3.4051	4.6056	0.0183	9.3497	0.1998	12.5883	21.5349	0.6917	0.0096	99.89	70.5887	-0.0146864
Cima5_cpx8	micro	SZ/OZ	47.0813	3.3447	4.7562	0.0128	9.071	0.1926	12.6117	21.5937	0.6338	0.0199	99.3178	71.2511	-0.0135882
Cima5_cpx8	micro	SZ/OZ	49.5836	2.3679	3.0841	0.0254	8.6859	0.1994	14.1853	21.4509	0.5105	0.019	100.112	74.4326	-0.020659
Cima5_cpx8	micro	SZ/OZ	45.8673	3.9927	5.8673	0.0184	9.0888	0.2027	12.4176	21.2023	0.6957	-0.0024	99.3504	70.8919	-0.00996543
Cima5_cpx8	micro	SZ/OZ	49.5966	2.2907	3.1043	0.0642	8.2855	0.196	14.3031	21.7587	0.469	0.0015	100.07	75.4737	-0.0208632
Cima5_cpx8	micro	SZ/OZ	44.9206	4.5284	6.1973	0.023	9.2131	0.1849	11.9623	21.3851	0.7192	0.0044	99.1382	69.8297	-0.0217485
Cima5_cpx9	micro	SZ/OZ	46.1963	3.8381	5.3344	-0.0038	9.5636	0.2293	12.0175	21.1159	0.7434	0.0076	99.0423	69.1357	-0.00988515
Cima5_cpx9	micro	SZ/OZ	46.0356	3.9844	5.7982	0.0178	9.024	0.1956	12.4876	21.2077	0.6983	0.0015	99.4507	71.1549	-0.00928231
Cima5_cpx9	micro	SZ/OZ	47.2126	3.2915	4.951	0.015	8.6907	0.1867	13.161	21.4573	0.6158	0.0121	99.5937	72.9695	-0.0118328
Cima5_cpx9	micro	SZ/OZ	47.6483	3.1952	4.7028	0.011	8.9324	0.2033	13.0131	21.7884	0.6596	0.0075	100.162	72.1987	-0.0156833
Cima5_cpx9	micro	SZ/OZ	47.9124	3.0527	3.9103	0.0155	9.3165	0.2136	12.7258	21.5259	0.6761	0.0081	99.3568	70.8872	-0.0199558
Cima5_cpx9	micro	SZ/OZ	49.8912	2.193	2.8157	0.0117	9.0576	0.2362	14.2061	21.4278	0.532	0.0062	100.377	73.6555	-0.0251445
Cima5_cpx9	micro	SZ/OZ	50.2762	1.9843	2.4985	0.0121	8.798	0.2271	14.5622	21.3089	0.5042	0.0086	100.18	74.6867	-0.0244265
Cima5_cpx9	micro	SZ/OZ	50.3773	1.8954	2.4997	0.016	8.4947	0.2114	14.7848	21.4028	0.4935	0.0132	100.189	75.625	-0.0240707
Cima5_cpx9	micro	SZ/OZ	50.1223	2.0252	2.5947	0.0238	8.5199	0.2055	14.5986	21.4133	0.4756	-0.0061	99.9726	75.3356	-0.0231687
Cima5_cpx10	micro	SZ/OZ	49.6225	2.1878	2.3799	0.001	9.0143	0.2528	14.0054	21.4989	0.5021	0.0105	99.4751	73.4719	-0.034264
Cima5_cpx10	micro	SZ/OZ	46.9768	3.6353	4.8321	0.0074	9.2215	0.202	12.8132	21.379	0.6879	0.0099	99.7649	71.2388	-0.023393
Cima5_cpx10	micro	SZ/OZ	46.6394	3.7358	5.2413	0.0142	9.0475	0.1994	12.6828	21.2589	0.6602	0.0127	99.4921	71.4191	-0.0124714
Cima5_cpx10	micro	SZ/OZ	46.05	3.8847	5.5517	-0.0085	9.1775	0.1878	12.4337	21.181	0.6801	0.0173	99.1554	70.718	-0.0125711
Cima5_cpx10	micro	SZ/OZ	45.7364	3.9987	5.6474	0.0278	9.0878	0.1854	12.4125	21.2283	0.6409	0.0162	98.9814	70.8857	-0.0160709
Cima5_cpx10	micro	SZ/OZ	46.0141	3.8373	5.6109	0.0368	9.0167	0.2	12.5947	21.4601	0.666	0.0246	99.4613	71.3464	-0.0193136
Cima5_cpx10	micro	SZ/OZ	46.0487	3.7461	5.5417	0.0565	8.9236	0.1844	12.7328	21.2827	0.634	0.0103	99.1609	71.7795	-0.0164795
Cima5_cpx10	micro	SZ/OZ	47.2039	3.1225	7.8694	0.0437	8.1297	0.1468	11.6217	20.2592	0.9698	0.012	99.3787	71.8174	0.118669
Cima5_cpx10	micro	SZ/OZ	48.5365	2.673	4.6823	0.0392	8.4775	0.1849	13.6519	20.858	0.5958	0.0223	99.7215	74.1644	0.0175572
Cima5_cpx10	micro	SZ/OZ	50.1453	2.0763	2.2858	0.0259	9.0174	0.2187	14.6367	21.242	0.4849	0.0031	100.136	74.3158	-0.036292
Cima5_cpx11	micro	SZ/OZ	50.5476	1.7167	1.8463	0.0099	10.0065	0.2628	13.3723	21.2711	0.6349	0.0229	99.6911	70.4334	-0.0204943
Cima5_cpx11	micro	SZ/OZ	50.4851	1.7395	1.8246	0.0096	9.5009	0.2558	13.842	21.3413	0.5012	0.0092	99.509	72.1997	-0.0240895
Cima5_cpx11	micro	SZ/OZ	50.2899	1.9911	2.138	0.011	8.8944	0.2356	14.1342	21.4922	0.4949	0.0056	99.6869	73.909	-0.0253866
Cima5_cpx11	micro	SZ/OZ	50.2833	2.0279	2.7477	0.001	8.6335	0.2101	14.4868	21.0079	0.4962	0	99.8945	74.9446	-0.00801038
Cima5_cpx11	micro	SZ/OZ	49.7364	1.8446	2.5716	0.0415	8.0211	0.1885	14.7126	21.5193	0.4801	0.0055	99.1211	76.5792	-0.0263272
Cima5_cpx11	micro	SZ/OZ	48.4937	2.4625	3.8699	0.0687	8.0603	0.1692	14.1165	21.8122	0.5395	0.0164	99.6088	75.7397	-0.0217693
Cima5_cpx11	micro	SZ/OZ	48.6504	2.3612	3.6411	0.0138	8.2393	0.1613	14.1399	21.7557	0.5212	-0.013	99.4708	75.3646	-0.0227839
Cima5_cpx11	micro	SZ/OZ	47.1787	3.1401	4.9076	0.0646	8.3355	0.176	13.2578	21.6826	0.5926	0.005	99.3405	73.9261	-0.012616
Cima5_cpx11	micro	SZ/OZ	48.1788	2.4995	4.0924	0.0617	8.4756	0.1777	13.3898	21.2402	0.5799	0.015	98.7105	73.7956	0.000473044
Cima5_cpx11	micro	SZ/OZ	47.2182	3.1757	4.956	0.0491	8.7312	0.1772	13.0754	21.7213	0.6037	-0.007	99.7007	72.7485	-0.0131555
Cima5_cpx12	micro	SZ/OZ	50.7502	1.619	1.8104	0.0149	9.1809	0.2378	13.8735	21.7215	0.5018	0.018	99.728	72.9271	-0.0211128
Cima5_cpx12	micro	SZ/OZ	50.3511	2.0322	2.3064	0.0028	8.8412	0.2246	14.34	21.6102	0.4701	0.012	100.191	74.3015	-0.0271603
Cima5_cpx12	micro	SZ/OZ	48	3.0507	4.3531	0.0331	8.6708	0.1746	13.4495	21.6345	0.5931	0.0019	99.9612	73.4398	-0.0172471
Cima5_cpx12	micro	SZ/OZ	49.9837	2.0038	2.7003	0.0418	8.3686	0.1957	14.6442	21.6848	0.4479	0.0118	100.083	75.7244	-0.0268349
Cima5_cpx12	micro	SZ/OZ	47.527	3.1235	4.888	0.0563	8.5756	0.1899	13.3783	21.4771	0.5694	0.0103	99.7954	73.5514	-0.00862135
Cima5_cpx12	micro	SZ/OZ	47.9581	2.9157	4.6629	0.046	8.3082	0.1726	13.7351	21.8343	0.5656	0.0145	100.213	74.6642	-0.0149267
Cima5_cpx12	micro	SZ/OZ	48.5465	2.5708	4.1685	0.0251	9.6011	0.2179	11.9519	20.5518	0.9351	0.0174	98.5862	68.935	0.0323329
Cima5_cpx13	micro	SZ/OZ	47.1501	2.9923	4.8705	0.0856	8.2978	0.1763	13.3814	21.7334	0.5647	0.0103	99.2623	74.1915	-0.0151994
Cima5_cpx13	micro	SZ/OZ	47.4707	2.6607	4.5522	0.1057	8.2142	0.1816	13.5097	21.6899	0.5639	0.0087	98.9572	74.5663	-0.0133013
Cima5_cpx13	micro	SZ/OZ	48.907	2.2086	3.6103	0.094	8.1671	0.1781	14.0797	21.6166	0.5188	0.003	99.3832	75.4487	-0.0125655
Cima5_cpx13	micro	SZ/OZ	47.8466	2.6313	4.6135	0.0919	8.2213	0.1829	13.4531	21.5533	0.5474	-0.0075	99.1337	74.4702	0.00077754
Cima5_cpx13	micro	SZ/OZ	47.244	2.9645	4.8207	0.1051	8.5265	0.188	13.4562	21.5347	0.6126	0.0041	99.4563	73.7755	-0.017848
Cima5_cpx13	micro	SZ/OZ	50.1222	1.9705	2.5411	0.0113	8.3527	0.1988	14.5561	21.3919	0.4414	0.0029	99.5889	75.6483	-0.0181116
Cima5_cpx14	micro	SZ/OZ	47.1718	2.8793	4.6799	0.0488	8.8327	0.1782	13.464	21.3513	0.568	-0.0004	99.1737	73.0986	-0.0198978
Cima5_cpx14	micro	SZ/OZ	47.2521	2.662	4.7496	0.0493	10.1976	0.2079	14.285	19.5831	0.5438	-0.0025	99.5277	71.4048	-0.0221296
Cima5_cpx14	micro	SZ/OZ	47.4307	3.09	4.7088	0.0258	8.6349	0.1819	13.3428	21.5068	0.6208	0.004	99.5464	73.3653	-0.0155763
Cima5_cpx14	micro	SZ/OZ	49.3948	2.0087	3.3545	0.0537	7.9985	0.1878	14.4525	21.6302	0.4926	0.0265	99.5998	76.3088	-0.0132551
Cima5_cpx14	micro	SZ/OZ	49.4044	2.1819	3.0406	0.0228	8.8452	0.191	14.4822	21.2486	0.4729	0.0214	99.9109	74.4809	-0.0276089
Cima5_cpx14	micro	SZ/OZ	50.5541	2.0017	2.5168	0.0206	8.5111	0.2049	14.6427	21.4569	0.4708	0.0148	100.394	75.4108	-0.0184977
Cima5_cpx14	micro	SZ/OZ	49.9832	2.2033	2.5787	0.0035	8.9114	0.2147	14.3601	21.3734	0.4959	0.0142	100.138	74.1771	-0.0281487
Cima5_cpx14	micro	SZ/OZ	47.4913	3.3302	4.453	-0.0026	9.1377	0.209	12.7116	21.4913	0.6697	0.01	99.5012	71.2627	-0.0152895
Cima5_cpx14	micro	SZ/OZ	50.1716	2.6937	6.9139	0.009	8.3736	0.1902	10.8122	18.2616	1.7793	0.0123	99.2173	69.7128	0.189989
Cima5_cpx15	micro	SZ/OZ	50.4067	1.9702	2.4087	0.0077	8.5325	0.1991	14.4177	21.691	0.5374	-0.0041	100.167	75.0755	-0.0236962
Cima5_cpx15	micro	SZ/OZ	48.8366	2.4988	3.9898	0.0618	8.4674	0.1927	14.0073	21.6168	0.5207	0.0048	100.197	74.6764	-0.0120489
Cima5_cpx15	micro	SZ/OZ	47.6866	2.6096	4.1687	0.0729	8.1974	0.1625	13.7188	21.854	0.5243	0.0152	99.0101	74.895	-0.0238235
Cima5_cpx15	micro	SZ/OZ	47.9809	2.7348	4.5015	0.0742	8.5091	0.1852	13.7956	21.7512	0.5434	-0.0067	100.069	74.2936	-0.0181981
Cima5_cpx15	micro	SZ/OZ	48.2099	2.3447	3.9786	0.0535	8.0033	0.1736	13.9361	21.8513	0.5246	0.0177	99.0932	75.6337	-0.0173367
Cima5_cpx15	micro	SZ/OZ	48.2258	2.4971	4.2569	0.0437	8.0837	0.178	13.8785	21.761	0.5397	0.0081	99.4724	75.3722	-0.0111433
Cima5_cpx15	micro	SZ/OZ	46.9177	2.9037	4.9412	0.0517	8.7618	0.176	13.3152	21.3294	0.5902	0.0116	98.9986	73.0385	-0.0145015
Cima5_cpx15	micro	SZ/OZ	46.8313	3.4385	4.9233	0.0157	8.7849	0.185	12.9108	21.5775	0.6375	0.0042	99.3087	72.3742	-0.0192585
Cima5_cpx15	micro	SZ/OZ	46.9048	3.5215	4.7455	0.0008	9.1157	0.1952	12.6858	21.7026	0.6859	0.0101	99.5681	71.2704	-0.0261126
Cima5_cpx16	micro	SZ/OZ	48.8146	2.8663	4.2009	0.0085	8.911	0.1979	13.1276	21.5751	0.6542	-0.009	100.347	72.4222	0.00162505
Cima5_cpx16	micro	SZ/OZ	47.442	2.7929	4.3714	0.0495	8.3049	0.1725	13.5255	21.8177	0.5385	0.0094	99.0241	74.3798	-0.0223032
Cima5_cpx16	micro	SZ/OZ	46.2337	3.2654	5.3408	0.0104	9.3319	0.2237	12.86	21.13	0.6926	0.0163	99.1049	71.0693	-0.0196445
Cima5_cpx16	micro	SZ/OZ	49.2552	2.1148	3.5303	0.0217	8.1054	0.1887	14.3816	21.3935	0.5341	0.0114	99.5367	75.9783	-0.00921253
Cima5_cpx16	micro	SZ/OZ	47.7248	3.0596	4.385	0.0199	9.1995	0.2065	13.3884	20.9016	0.5377	0.0136	99.4367	72.178	-0.0123558
Cima5_cpx16	micro	SZ/OZ	49.7995	1.8506	2.6613	0.0545	7.7935	0.1784	14.6431	21.8197	0.4841	0.0157	99.3005	77.0078	-0.0240558
Cima5_cpx16	micro	SZ/OZ	50.0494	1.9707	2.482	0.0169	8.4161	0.2049	14.6056	21.4861	0.4678	0.0206	99.72	75.5715	-0.0263487
Cima5_cpx16	micro	SZ/OZ	49.4356	2.1074	2.4521	0.0041	8.6154	0.2146	14.416	21.3021	0.4498	0.0102	99.0073	74.8919	-0.033989
Cima5_cpx16	micro	SZ/OZ	45.6498	4.2637	5.5622	0.0046	9.7194	0.212	11.9579	20.9181	0.7743	0.0259	99.088	68.6829	-0.0192287
Cima5_cpx17	micro	SZ/OZ	47.2631	3.0381	4.7752	0.041	8.4878	0.1768	13.3413	21.7125	0.5783	0.0163	99.4304	73.6975	-0.017169
Cima5_cpx17	micro	SZ/OZ	47.958	2.6526	4.3879	0.0523	8.2618	0.1616	13.6337	21.8912	0.5386	0.0244	99.5621	74.6299	-0.0141065
Cima5_cpx17	micro	SZ/OZ	47.7014	2.7328	4.4927	0.0488	8.4026	0.1792	13.6263	21.6217	0.5521	0.0147	99.3723	74.2983	-0.0148973
Cima5_cpx17	micro	SZ/OZ	48.0479	2.77	4.7011	0.0301	8.6205	0.1766	13.2878	21.6593	0.5807	0.0059	99.8799	73.3171	0.000407927
Cima5_cpx17	micro	SZ/OZ	47.0454	3.0632	5.1662	0.0756	8.5918	0.1792	13.3754	21.5966	0.5999	0.0028	99.696	73.5105	-0.0142719
Cima5_cpx17	micro	SZ/OZ	48.6598	2.3431	3.5849	0.0477	8.1597	0.1954	14.2419	21.8523	0.5497	0.0047	99.6391	75.677	-0.0293558
Cima5_cpx17	micro	SZ/OZ	50.365	1.8215	2.4001	0.0028	8.6189	0.1942	14.4753	21.6387	0.5145	0.0073	100.038	74.9614	-0.0237346
Cima5_cpx18	micro	SZ/OZ	48.3511	2.8179	3.2694	-0.0044	10.0621	0.2905	12.3759	21.1049	0.9191	0.0222	99.2088	68.6766	-0.0257633
Cima5_cpx18	micro	SZ/OZ	50.0216	2.1588	2.2001	-0.0073	9.5545	0.253	13.741	21.319	0.5323	0.0144	99.7874	71.9391	-0.028783
Cima5_cpx18	micro	SZ/OZ	49.7139	2.0555	2.5734	0.0142	8.6293	0.2067	14.4788	21.4681	0.464	0.0012	99.605	74.9433	-0.0308427
Cima5_cpx18	micro	SZ/OZ	49.1348	2.2787	3.6437	0.0769	8.1362	0.1731	14.281	21.6182	0.5181	0.013	99.8736	75.7804	-0.0134398
Cima5_cpx18	micro	SZ/OZ	49.4229	2.1327	2.5326	0.0097	8.9678	0.2288	14.3628	21.3957	0.4803	0.0146	99.5479	74.0596	-0.0399908
Cima5_cpx18	micro	SZ/OZ	49.5809	2.1648	2.8103	0.0163	8.9314	0.2262	14.2049	21.3485	0.4486	0.0015	99.7334	73.9252	-0.0241745
Cima5_cpx18	micro	SZ/OZ	49.6167	2.2001	2.8088	0.0131	8.845	0.2107	14.504	21.3391	0.4931	-0.0023	100.028	74.5099	-0.0318748
Cima5_cpx18	micro	SZ/OZ	50.3198	1.832	2.7455	0.055	8.0402	0.1853	14.7652	21.5456	0.5155	0.0019	100.006	76.6005	-0.014888
Cima5_cpx18	micro	SZ/OZ	49.8098	1.9664	2.4043	0.008	8.8454	0.2203	14.2558	21.5426	0.4329	0.002	99.4875	74.1798	-0.0293159
Cima5_cpx19	micro	SZ/OZ	48.5946	2.5607	3.627	-0.0076	9.2451	0.2113	12.8462	22.0008	0.6677	0.0166	99.7623	71.2391	-0.0176239
Cima5_cpx19	micro	SZ/OZ	47.7523	2.7808	4.4954	0.0248	8.5308	0.1675	13.3419	21.7017	0.5638	0.0014	99.3604	73.6003	-0.0099096
Cima5_cpx19	micro	SZ/OZ	47.7543	2.5969	4.345	0.1394	8.257	0.1701	13.7298	21.6116	0.5622	0.0146	99.1807	74.7737	-0.0172255
Cima5_cpx19	micro	SZ/OZ	48.2453	2.5439	4.2335	0.0517	8.0891	0.1827	14.145	21.8438	0.565	0.0239	99.9239	75.7113	-0.0223051
Cima5_cpx19	micro	SZ/OZ	49.5003	2.1063	2.8934	0.0218	8.1313	0.1998	14.3776	21.7063	0.4897	0.002	99.4286	75.9149	-0.0235985
Cima5_cpx19	micro	SZ/OZ	50.5986	1.7991	2.0243	0.0073	8.8452	0.2254	14.1047	21.7974	0.5147	0.0064	99.9231	73.9756	-0.0243594
Cima5_cpx20	pheno	verm	48.0988	2.5899	4.3454	0.0111	8.2578	0.1903	13.4427	21.4505	0.5052	0.0145	98.9063	74.3711	0.00417789
Cima5_cpx20	pheno	verm	48.2204	2.0517	5.2256	0.0876	8.3671	0.1748	13.6388	21.6192	0.5597	0.0224	99.9673	74.3965	0.0197965
Cima5_cpx20	pheno	verm	49.1392	1.7926	4.5836	0.0764	8.5839	0.1884	14.0255	21.2228	0.4886	0.0096	100.111	74.4418	0.0228104
Cima5_cpx20	pheno	verm	48.998	2.1144	4.123	0.0934	7.9456	0.1827	14.0549	21.8094	0.4965	0.0115	99.8294	75.9223	0.00261334
Cima5_cpx20	pheno	verm	48.5977	2.3468	4.0807	0.1588	8.1446	0.1844	13.9208	21.6137	0.52	0.0091	99.5766	75.2892	-0.00627352
Cima5_cpx21	micro	SZ/OZ	47.8868	2.7929	4.3302	0.0201	8.8297	0.1999	13.473	21.4815	0.5789	0.0241	99.6171	73.1184	-0.0164257
Cima5_cpx21	micro	SZ/OZ	50.2801	1.8518	2.7278	0.0563	7.8484	0.1698	14.7951	21.6624	0.4855	0.0147	99.892	77.0663	-0.0154096
Cima5_cpx21	micro	SZ/OZ	48.7247	2.5635	3.9223	0.027	8.9047	0.209	14.1108	21.2849	0.5285	0.0007	100.276	73.8547	-0.0195074
Cima5_cpx21	micro	SZ/OZ	47.567	2.6222	4.5182	0.0491	8.4279	0.174	13.6764	21.5759	0.5798	0.0242	99.2148	74.311	-0.0172167
Cima5_cpx21	micro	SZ/OZ	50.2526	1.9107	2.4462	0.0235	8.4808	0.1952	14.7227	21.4603	0.4382	-0.0098	99.9204	75.5775	-0.024652
oxide wt %	pheno vs micro	Texture	SiO2	TiO2	Al2O3	Cr2O3	FeO	MnO	MgO	CaO	Na2O	NiO	sum	Mg#	Al VI
Cima8_cpx1	MICRO	NS	47.6651	2.8258	4.2033	0.0295	8.6685	0.1929	13.3952	21.5447	0.5885	0.012	99.1256	73.366	-0.0206875
Cima8_cpx1	MICRO	NS	47.9441	2.2842	4.4634	0.2034	8.3518	0.1784	13.6899	21.4812	0.578	0.0112	99.1855	74.5025	-0.00596773
Cima8_cpx1	MICRO	NS	50.1616	1.0345	4.1523	0.1874	8.1315	0.2039	15.9529	19.0509	0.6922	0.0162	99.5833	77.764	0.0306415
Cima8_cpx1	MICRO	NS	46.9171	2.4371	5.4158	0.3113	8.3746	0.1846	13.3124	21.6823	0.5392	0.0174	99.1917	73.9151	-0.000624183
Cima8_cpx2	MICRO	VERM	47.2045	2.5457	6.1212	0.3254	8.2199	0.1775	12.9827	20.6382	0.6383	0.0218	98.8752	73.7909	0.0479887
Cima8_cpx2	MICRO	VERM	49.3683	2.1561	4.5732	0.2183	8.3685	0.1944	13.8937	20.3905	0.6252	-0.0082	99.7799	74.7445	0.0388195
Cima8_cpx2	MICRO	VERM	49.8447	1.9507	3.2889	0.0712	8.2202	0.183	14.5024	21.6843	0.536	0.0189	100.3	75.8741	-0.0129024
Cima8_cpx2	MICRO	VERM	48.5916	2.2044	4.2083	0.2416	8.3126	0.1852	13.9118	21.7145	0.548	-0.0083	99.9096	74.8953	-0.00788036
Cima8_cpx3	PHENO	OZ/SZ	49.478	1.8261	2.7771	0.0355	8.0939	0.1944	14.5961	21.7976	0.4794	0.0176	99.2957	76.2731	-0.029958
Cima8_cpx3	PHENO	VERM	47.8509	1.844	4.4806	0.0328	8.4874	0.1931	13.7524	21.892	0.5019	0.0174	99.0524	74.2824	-0.00839902
Cima8_cpx3	PHENO	VERM	48.1279	1.2027	5.5087	0.0382	10.7106	0.2427	13.2835	18.624	0.9986	0.0154	98.7524	68.8552	0.0544597
Cima8_cpx3	PHENO	VERM	48.0443	1.1777	5.4153	0.0269	10.6476	0.2452	13.3653	18.6791	1.0186	0.0134	98.6333	69.1128	0.0482429
Cima8_cpx3	PHENO	OZ/SZ	50.0867	1.7669	2.2795	0.0146	8.424	0.2134	14.4267	21.6972	0.4877	-0.0012	99.3954	75.3258	-0.0271597
Cima8_cpx4	MICRO	NS	49.3335	2.0566	3.1658	0.0788	8.5522	0.2137	14.3923	21.2742	0.4522	0.0066	99.5259	74.9993	-0.0181825
Cima8_cpx4	MICRO	NS	49.711	1.1183	4.9567	0.197	7.7953	0.2007	15.8303	19.0321	0.7241	0.0119	99.5773	78.355	0.0464023
Cima8_cpx4	MICRO	NS	49.4599	1.4053	5.3476	0.0546	9.265	0.2348	16.2464	17.6058	0.6127	-0.0012	100.231	75.7624	0.0457402
Cima8_cpx4	MICRO	NS	47.166	1.8434	7.3285	0.371	7.8587	0.1643	14.1962	19.4177	0.7295	0.0129	99.088	76.3041	0.0758211
Cima8_cpx4	MICRO	NS	47.2344	2.8334	4.9038	0.0457	8.8117	0.197	13.2532	21.4536	0.6074	0.0267	99.367	72.8342	-0.0109699
Cima8_cpx5	MICRO	NS	48.1381	1.8382	5.6133	0.4147	7.3712	0.1694	14.5167	20.9882	0.5492	0.0136	99.6124	77.83	0.0291686
Cima8_cpx5	MICRO	NS	49.7812	0.8247	4.5386	0.0556	10.5235	0.3073	13.7609	18.7073	1.0462	0.0189	99.5642	69.9788	0.0537499
Cima8_cpx5	MICRO	NS	50.6329	0.7175	3.9583	0.0537	10.2943	0.3065	14.4568	18.8956	1.0014	0.0151	100.332	71.4562	0.040126
Cima8_cpx5	MICRO	NS	47.9262	1.849	7.1341	0.3445	7.3693	0.1604	15.1775	19.0717	0.7091	0.0118	99.7537	78.5929	0.0733057
Cima8_cpx5	MICRO	NS	48.0636	2.663	4.0508	0.0374	8.6342	0.1939	13.5786	21.8047	0.5751	0.0147	99.6159	73.7078	-0.0236839
Cima8_cpx6	MICRO	VERM	47.869	2.3553	4.5115	0.4712	8.2279	0.1879	13.6663	21.6298	0.5489	0.0008	99.4684	74.7528	-0.0106201
Cima8_cpx6	MICRO	VERM	47.4641	2.1809	4.8894	0.3955	8.0479	0.1788	13.8199	21.4135	0.5541	0.0226	98.9667	75.376	-0.00380591
Cima8_cpx6	MICRO	VERM	50.5376	1.667	2.1667	0.0156	8.576	0.2236	14.5888	21.6039	0.5239	0.0153	99.9185	75.2009	-0.0263768
Cima8_cpx7	MICRO	VERM	50.2956	1.791	2.1334	0.0108	8.4944	0.221	14.3263	21.8378	0.4548	0.0114	99.5763	75.0402	-0.0270285
Cima8_cpx7	MICRO	NS	49.647	0.6874	3.4278	0.0868	12.1465	0.2316	13.2534	19.1986	0.6396	0.0491	99.3678	66.0446	0.0224005
Cima8_cpx7	MICRO	NS	50.0192	0.6771	3.3783	0.1041	12.0023	0.2176	13.3424	19.228	0.639	0.0408	99.6488	66.4613	0.0276632
Cima8_cpx7	MICRO	VERM	49.8037	1.8812	2.6654	0.013	8.2668	0.1954	14.5087	21.5862	0.505	0.0147	99.44	75.7784	-0.0236626
Cima8_cpx8	MICRO	NS	47.0485	3.0503	4.7961	0.0173	8.6711	0.187	13.3911	21.7151	0.5863	0.023	99.4859	73.3541	-0.0253978
Cima8_cpx8	MICRO	VERM	49.5957	1.6897	3.4222	0.2914	7.72	0.1743	14.6703	21.8442	0.497	0.024	99.9288	77.2078	-0.0128744
Cima8_cpx8	MICRO	VERM	49.4903	2.0093	3.0264	0.0413	8.2791	0.194	14.4585	21.8278	0.4847	0.0122	99.8235	75.6874	-0.0265532
Cima8_cpx8	MICRO	NS	47.8781	2.5587	4.3057	0.0327	8.4469	0.1826	13.5974	21.5912	0.55	0.0174	99.1607	74.1571	-0.0123479
Cima8_cpx9	MICRO	VERM	49.4062	1.7941	2.8219	0.0206	8.5021	0.1969	15.2169	21.2995	0.4136	0.024	99.6956	76.1362	-0.0409706
Cima8_cpx9	MICRO	VERM	49.2174	1.7199	3.8964	0.177	7.9514	0.1866	15.0175	21.2169	0.4472	0.0179	99.8483	77.0995	-0.00737581
Cima8_cpx9	MICRO	VERM	45.4318	2.4322	8.3867	0.4486	7.3681	0.1473	13.3261	20.5374	0.6513	0.0338	98.7632	76.326	0.0698908
Cima8_cpx9	MICRO	VERM	47.9305	1.8438	6.1536	0.3443	7.4809	0.1895	14.45	20.7321	0.5793	0.0238	99.7278	77.4939	0.0417247
Cima8_cpx9	MICRO	VERM	47.1211	2.5662	5.2105	0.0318	8.5838	0.1771	13.2068	21.5801	0.6024	0.0189	99.0987	73.281	0.000604352
Cima8_cpx10	MICRO	VERM	53.1655	0.3874	0.1923	-0.0082	9.8067	0.2177	14.4137	21.666	0.4671	0.0178	100.326	72.3759	-0.0160335
Cima8_cpx10	MICRO	VERM	52.4818	0.7967	0.6234	0.0159	8.3691	0.1984	14.954	22.1547	0.4193	0.0138	100.027	76.106	-0.0256696
Cima8_cpx10	MICRO	VERM	49.4492	2.0259	3.2254	0.053	8.1494	0.1788	14.4209	21.7802	0.475	0.0009	99.7587	75.9292	-0.0186109
Cima8_cpx11	PHENO	VERM	49.3479	1.9618	3.2358	0.0307	8.1828	0.188	14.3405	21.6402	0.511	0.0228	99.4614	75.7519	-0.016314
Cima8_cpx11	PHENO	VERM	49.0753	1.9887	3.7866	0.0312	8.6806	0.22	14.3764	21.4168	0.5824	0.0297	100.188	74.6979	-0.0169372
Cima8_cpx11	PHENO	VERM	51.7941	1.0937	3.7964	0.0182	8.2868	0.2541	12.6745	20.3672	0.9873	-0.0009	99.2713	73.1648	0.107367
Cima8_cpx11	PHENO	VERM	55.0224	0.2175	26.8546	-0.0057	0.7514	0.0059	0.1216	9.7917	6.4591	-0.0042	99.2141	22.3891	1.14751
Cima8_cpx11	PHENO	VERM	48.9766	2.1635	3.5385	0.0269	8.2993	0.1842	14.0627	22.0007	0.5512	0.0127	99.8164	75.1275	-0.0217831
Cima8_cpx12	PHENO	OZ/SZ	49.8686	1.8392	2.408	0.0304	8.2707	0.1967	14.63	21.9885	0.4841	0.0242	99.7404	75.9223	-0.0385839
Cima8_cpx12	PHENO	NS	46.5007	1.9746	7.9483	0.6851	7.2094	0.1475	13.9705	20.3464	0.7429	0.0138	99.5392	77.55	0.0678759
Cima8_cpx12	PHENO	NS	46.0708	2.0337	7.6351	0.4995	7.2526	0.154	13.9728	20.5998	0.6857	0.0114	98.9153	77.4487	0.0514584
Cima8_cpx12	PHENO	NS	46.6932	1.8973	7.3822	0.5028	7.029	0.153	14.021	20.713	0.6705	0.0173	99.0793	78.05	0.0595849
Cima8_cpx12	PHENO	OZ/SZ	45.8806	2.394	8.2421	0.4453	7.725	0.1452	13.4288	20.4781	0.6284	0.0184	99.3859	75.6025	0.0691194
Cima8_cpx13	PHENO	NS	48.0663	1.9621	6.0291	0.1444	7.7163	0.1382	13.6823	20.9901	0.677	0.0131	99.419	75.9664	0.0531271
Cima8_cpx13	PHENO	NS	51.0382	0.6771	4.1869	0.5244	7.4371	0.1652	17.1622	18.0071	0.6972	0.015	99.9103	80.4443	0.0457237
Cima8_cpx13	PHENO	NS	50.3614	0.741	4.3848	0.5644	6.7524	0.1431	15.6151	20.0905	0.8112	0.036	99.4996	80.4775	0.0444557
Cima8_cpx13	PHENO	NS	47.1327	2.6357	6.1848	0.1222	8.4168	0.1647	13.2279	21.5798	0.6211	0.0009	100.087	73.6949	0.0216832
Cima8_cpx14	PHENO	VERM	47.6301	1.6102	7.0302	0.5388	6.7959	0.1309	14.2681	20.8316	0.6856	0.0147	99.5361	78.9145	0.0666567
Cima8_cpx14	PHENO	NS	46.9344	1.9306	7.7283	0.3284	7.7566	0.1675	13.6917	20.081	0.8172	0.0118	99.4476	75.8837	0.0787477
Cima8_cpx14	PHENO	NS	46.9715	1.9577	7.8236	0.3765	7.6316	0.1749	13.7407	20.0483	0.8093	0.0139	99.548	76.2446	0.0816915
Cima8_cpx14	PHENO	NS	46.6009	2.0825	8.0142	0.474	7.414	0.1655	13.5816	20.5156	0.769	0.0111	99.6285	76.5561	0.0758745
Cima8_cpx15	MICRO	VERM	49.5264	2.1965	2.9131	0.0088	8.8668	0.2463	13.7647	21.7355	0.6342	0.0044	99.8967	73.4556	-0.0245178
Cima8_cpx15	MICRO	VERM	48.8308	2.2782	3.9901	0.0443	8.2049	0.1689	14.0986	21.6742	0.5605	0.021	99.8715	75.388	-0.00966594
Cima8_cpx16	PHENO	NS	47.3205	1.624	7.5456	0.8363	6.2759	0.1215	14.7598	20.495	0.6327	0.0311	99.6423	80.7409	0.0702412
Cima8_cpx16	PHENO	NS	45.2209	2.3656	10.0387	0.3811	7.1247	0.1362	13.4061	19.9112	0.7175	0.0231	99.3251	77.0336	0.115415
Cima8_cpx16	PHENO	NS	50.4025	1.034	5.1744	0.5458	6.1128	0.1452	16.6113	19.5219	0.5824	0.0328	100.163	82.8888	0.0595314
Cima8_cpx16	PHENO	NS	48.4529	2.2703	4.1937	0.1054	8.2052	0.1657	14.1428	21.6608	0.528	0.0173	99.7422	75.4454	-0.0127628
Cima8_cpx17	PHENO	NS	50.2087	0.7737	3.7354	0.0332	10.9878	0.2776	13.4711	19.6996	0.7245	0.0053	99.9169	68.6075	0.0380255
Cima8_cpx17	PHENO	NS	50.1852	0.7933	3.6564	0.0509	11.6572	0.2961	13.7665	18.7352	0.7063	0.0097	99.8568	67.7954	0.0362491
Cima8_cpx17	PHENO	NS	50.0587	0.8403	3.7621	0.0273	11.4406	0.3201	13.8431	18.7211	0.7947	0.0151	99.8231	68.3237	0.033861
Cima8_cpx17	PHENO	NS	49.7296	1.0544	4.4718	0.0329	11.3608	0.3111	13.4259	19.2089	0.8135	0.0148	100.424	67.8107	0.0426211
Cima8_cpx17	PHENO	NS	49.6579	0.9374	4.1367	0.0261	11.1229	0.3066	13.4267	19.1501	0.7947	0.0035	99.5626	68.2722	0.0417619
Cima8_cpx17	PHENO	NS	50.2131	0.8528	3.8106	0.0448	11.9201	0.3098	14.0114	18.3321	0.7345	0.0096	100.239	67.6934	0.0352116
Cima8_cpx17	PHENO	NS	50.0124	0.9358	3.9298	0.028	11.7756	0.3216	13.8981	18.6284	0.7631	0.0118	100.305	67.7825	0.0314285
Cima8_cpx18	PHENO	NS	50.0782	0.8933	3.8054	0.03	11.4388	0.308	13.51	19.2733	0.7518	0.0221	100.111	67.7977	0.0341809
Cima8_cpx18	PHENO	NS	49.0307	1.1809	4.8574	0.0486	11.5458	0.3244	12.9569	18.9158	0.8253	0.0194	99.7053	66.6718	0.0517999
Cima8_cpx18	PHENO	NS	49.9975	0.8584	3.9676	0.0638	11.0255	0.2844	13.3737	19.5274	0.775	0.0066	99.8798	68.3769	0.0412526
Cima8_cpx18	PHENO	NS	50.111	0.8661	3.9266	0.0294	11.3754	0.2944	13.396	19.4726	0.7735	0.0049	100.25	67.734	0.0376913
Cima8_cpx18	PHENO	NS	47.2921	3.0275	5.2507	0.0311	8.4732	0.1562	13.7898	21.2756	0.5512	0.0021	99.8496	74.3662	-0.00781269
Cima8_cpx19	MICRO	NS	48.293	1.9241	5.4769	0.3857	7.5752	0.1688	14.2809	21.1053	0.5834	0.0209	99.8142	77.0673	0.0280216
Cima8_cpx19	MICRO	NS	49.8261	0.8887	4.135	0.0283	11.8641	0.3291	13.2423	19.0606	0.7989	0.0176	100.191	66.5515	0.0399866
Cima8_cpx19	MICRO	NS	47.9371	1.3886	4.4403	0.0693	13.0394	0.3419	12.5824	18.3526	0.7366	0.0313	98.9194	63.2369	0.0201357
Cima8_cpx19	MICRO	NS	50.6449	0.6973	3.4555	0.0326	11.2555	0.2819	13.3946	19.8288	0.7292	0.02	100.34	67.9628	0.0358935
Cima8_cpx20	MICRO	NS	49.627	0.8065	3.8467	0.0201	11.2105	0.32	13.3742	18.9208	0.747	0.0018	98.8745	68.0169	0.0432104
Cima8_cpx20	MICRO	NS	49.2054	1.0078	4.2876	0.061	11.8366	0.3025	13.4015	18.6382	0.7846	0.015	99.5401	66.8684	0.0352139
Cima8_cpx20	MICRO	NS	49.7198	0.682	3.4326	0.0507	10.9847	0.2961	13.3714	19.5634	0.7409	-0.0015	98.8401	68.4533	0.0283668
Cima8_cpx20	MICRO	NS	48.4683	2.1935	3.8165	0.0786	8.25	0.1847	13.8555	21.8837	0.5472	0.013	99.2911	74.9611	-0.0174484
Cima8_cpx21	PHENO	VERM	49.1631	2.0537	3.2851	0.0453	8.1732	0.1827	14.3747	21.8466	0.5296	0.0149	99.6689	75.8171	-0.0254931
Cima8_cpx21	PHENO	VERM	48.5923	1.1469	5.2309	-0.006	10.5107	0.2543	13.3682	19.4881	0.8652	0.0156	99.4662	69.3929	0.0460125
Cima8_cpx21	PHENO	VERM	48.6673	0.994	5	0.0126	10.3001	0.2556	13.3958	19.622	0.8416	0.0098	99.0988	69.8646	0.0450753
Cima8_cpx21	PHENO	VERM	48.5909	1.8635	4.1919	0.0176	8.2029	0.176	14.0547	21.7579	0.4948	0.0025	99.3527	75.3346	-0.00149569
Cima8_cpx21	PHENO	VERM	48.7492	1.0315	5.1952	-0.0011	10.2223	0.2255	13.2499	19.6987	0.8491	0.0152	99.2355	69.7936	0.0544226
Cima8_cpx21	PHENO	VERM	48.7	2.2933	3.9861	0.0434	9.2171	0.2058	13.6886	20.9126	0.6045	0.0076	99.659	72.5831	-0.00350408
Cima8_cpx21	PHENO	VERM	48.4886	1.0771	5.3725	0.0011	10.3559	0.2118	13.1627	19.9147	0.8524	0.0074	99.4443	69.379	0.0489283
Cima8_cpx22	PHENO	OZ/SZ	49.9998	1.7323	2.5369	0.0269	8.6196	0.2262	14.6756	21.4545	0.4979	0.0215	99.7912	75.217	-0.0287078
Cima8_cpx22	PHENO	NS	49.4256	1.2787	5.1029	0.3178	8.131	0.1728	14.3949	20.2071	0.7792	0.0268	99.8369	75.9376	0.0498998
Cima8_cpx22	PHENO	NS	49.2399	1.2347	4.8581	0.4502	7.6586	0.1604	14.5864	20.5026	0.7315	0.0311	99.4534	77.2473	0.0378526
Cima8_cpx22	PHENO	OZ/SZ	49.3263	2.0969	2.784	0.0114	9.2387	0.2428	14.2507	21.3186	0.4706	-0.0102	99.7298	73.3309	-0.0348067
Cima8_cpx23	PHENO	NS	53.0218	0.244	2.7525	0.3065	13.0004	0.2381	27.5824	2.7992	0.1544	0.0422	100.141	79.0885	0.00582156
Cima8_cpx23	PHENO	NS	53.5973	0.197	2.1805	0.2261	12.9316	0.222	29.2452	1.5795	0.0988	0.0664	100.344	80.1248	-0.0122177
Cima8_cpx23	PHENO	NS	53.4865	0.2124	2.1053	0.2183	12.9332	0.2311	29.2912	1.6225	0.0801	0.0607	100.241	80.1478	-0.0173496
Cima8_cpx24	MICRO	VERM	49.9228	1.8593	2.7772	0.0453	8.0452	0.1915	14.6676	21.8728	0.5123	0.0191	99.9132	76.4702	-0.0259495
Cima8_cpx24	MICRO	VERM	48.6087	1.2511	5.5957	0.0081	10.4979	0.2996	13.2229	18.9599	1.0937	-0.0132	99.5244	69.1863	0.0591844
Cima8_cpx24	MICRO	VERM	49.1328	1.5244	3.1153	0.025	8.0559	0.2005	14.4105	21.8054	0.4271	0.0148	98.7117	76.1264	-0.0172946
Cima8_cpx24	MICRO	VERM	50.1426	1.8232	2.5298	0.0202	8.3744	0.2226	14.5497	21.7459	0.487	0.0005	99.896	75.5924	-0.0251094
Cima8_cpx25	MICRO	VERM	48.8301	2.1752	3.3999	0.0749	8.1566	0.1916	14.1444	21.7822	0.5344	0.0093	99.2986	75.5573	-0.0237067
Cima8_cpx25	MICRO	VERM	49.0706	2.2058	3.6932	0.1632	8.1377	0.1738	14.4005	21.8071	0.5555	0.0208	100.228	75.9296	-0.0222231
Cima8_cpx25	MICRO	VERM	49.0477	1.9864	3.7717	0.2726	8.0639	0.194	14.584	21.583	0.5196	0.0273	100.05	76.3253	-0.0181509
Cima8_cpx25	MICRO	VERM	47.3784	2.6171	4.9592	0.563	8.5324	0.1907	13.1018	21.7282	0.5864	0.0005	99.6577	73.2423	-0.00731459
Cima8_cpx25	MICRO	VERM	50.2674	1.7351	2.3348	0.0169	8.2446	0.216	14.7509	21.6682	0.5176	0.01	99.7616	76.1299	-0.0288924
Cima8_cpx26	PHENO	OZ/SZ	50.2983	1.7742	2.2708	0.0173	8.5303	0.2379	14.5486	21.5557	0.4718	-0.002	99.7028	75.2491	-0.0255101
Cima8_cpx26	PHENO	OZ/SZ	49.9033	1.7934	3.0195	0.0099	7.9127	0.1789	14.7333	22.0973	0.4416	0.016	100.106	76.8473	-0.0210598
Cima8_cpx26	PHENO	OZ/SZ	49.2453	1.8818	3.3821	0.0221	7.9458	0.1738	14.5555	21.6616	0.4638	0.0241	99.3558	76.5558	-0.0146225
Cima8_cpx26	PHENO	OZ/SZ	48.6853	2.2095	3.9717	0.0146	8.0992	0.2132	14.3075	21.493	0.6033	0.0044	99.6017	75.8979	-0.0138508
Cima8_cpx26	PHENO	OZ/SZ	48.0843	2.6455	3.995	0.0236	8.491	0.1882	13.5494	21.7588	0.5581	0.0224	99.3162	73.9892	-0.0195971
Cima8_cpx27	PHENO	VERM	48.1951	2.6539	3.7739	0.0139	8.8275	0.2062	13.3109	21.8221	0.6235	0.0167	99.4438	72.8847	-0.024748
Cima8_cpx27	PHENO	VERM	46.5324	2.4706	6.366	0.2898	8.0771	0.1743	13.0093	21.84	0.5823	0.014	99.3557	74.1677	0.0216387
Cima8_cpx27	PHENO	VERM	47.3175	2.1364	5.5937	0.2937	8.2479	0.1951	13.6629	21.48	0.5641	0.0235	99.5148	74.7023	0.010383
Cima8_cpx27	PHENO	VERM	49.7378	1.9157	2.92	0.0333	8.1636	0.1948	14.379	21.7702	0.52	0.0267	99.6611	75.8441	-0.0191904
Cima8_cpx28	PHENO	NS	48.6598	2.233	3.8256	0.0633	8.2478	0.1781	14.1052	21.7511	0.5189	0.007	99.5898	75.2998	-0.017023
Cima8_cpx28	PHENO	NS	49.451	0.843	4.3109	0.0105	11.7197	0.3299	13.497	18.2469	0.8348	0.0075	99.2513	67.2445	0.0484352
Cima8_cpx28	PHENO	NS	49.558	0.9197	3.9846	0.0109	11.8448	0.3564	13.5541	18.5796	0.8328	0.0158	99.6567	67.1035	0.0312898
Cima8_cpx28	PHENO	NS	47.1791	2.9703	5.3957	0.036	9.1417	0.1972	13.2987	21.3129	0.6619	0.0095	100.203	72.1696	-0.00811155
Cima8_cpx29	MICRO	VERM	49.1437	1.458	5.6536	0.0749	7.8498	0.1866	15.1664	19.614	0.6908	0.0018	99.8394	77.4983	0.0555681
Cima8_cpx29	MICRO	VERM	50.3262	1.4074	4.5461	0.154	7.5877	0.1741	15.24	19.9075	0.5115	0.0304	99.8851	78.1677	0.0550921
Cima8_cpx29	MICRO	VERM	48.6022	2.4295	4.4367	0.1471	8.6443	0.1933	13.9404	21.1979	0.6009	0.0091	100.201	74.1918	-0.00231191
Cima8_cpx30	MICRO	OZ/SZ	48.8353	2.4199	4.5377	0.0376	8.3681	0.1876	13.7359	21.4683	0.6015	0.0172	100.209	74.5292	0.0104728
Cima8_cpx30	MICRO	NS	47.7334	1.439	6.5949	-0.0135	10.8129	0.2639	12.0475	18.8891	1.2422	0.0027	99.0121	66.5118	0.087574
Cima8_cpx30	MICRO	NS	47.7839	1.513	6.7851	-0.0034	10.6943	0.2484	12.3112	19.0571	1.2153	0.0164	99.6212	67.2358	0.0830119
Cima8_cpx30	MICRO	OZ/SZ	48.0314	2.7261	4.0832	0.0208	8.6823	0.1978	13.3789	21.6679	0.5977	-0.0051	99.3811	73.3111	-0.0172545
Cima8_cpx31	PHENO	VERM	49.7933	1.7942	2.6503	0.0367	8.1377	0.1881	14.6015	21.8976	0.4876	0.0159	99.6029	76.1821	-0.0293415
Cima8_cpx31	PHENO	VERM	47.1155	1.955	7.0414	0.4484	7.4356	0.15	13.6694	20.6455	0.7505	0.023	99.2343	76.6195	0.0619712
Cima8_cpx31	PHENO	VERM	47.3307	2.5878	5.0602	0.3936	8.3042	0.1736	13.3828	21.6068	0.5831	0.0072	99.43	74.1787	-0.00461109
Cima8_cpx31	PHENO	VERM	48.1653	1.8531	5.8068	0.3784	7.7291	0.1643	14.2175	20.5345	0.6279	0.0088	99.4858	76.6303	0.0434936
Cima8_cpx31	PHENO	VERM	47.2457	2.3785	5.9928	0.1141	8.3966	0.1731	13.63	21.142	0.5924	0.0047	99.67	74.3171	0.0220349
Cima8_cpx32	PHENO	VERM	49.0038	2.1446	3.6426	0.051	8.2604	0.1961	14.2834	21.9531	0.5196	0.0162	100.071	75.5044	-0.0227245
Cima8_cpx32	PHENO	VERM	47.5832	2.6214	4.5878	0.0577	8.4424	0.1587	13.5647	21.7527	0.5587	0.0261	99.3534	74.1211	-0.0151867
Cima8_cpx33	PHENO	NS	49.9163	1.8013	2.7704	0.0414	8.0871	0.1979	14.5816	21.7644	0.482	0.004	99.6465	76.2704	-0.0203556
Cima8_cpx33	PHENO	NS	44.613	2.8476	8.9954	0.137	7.9329	0.1346	12.5358	20.6672	0.7085	0.0164	98.5885	73.8008	0.0762105
Cima8_cpx33	PHENO	NS	42.5892	4.1872	11.4412	0.0695	8.3413	0.1485	11.984	20.0954	0.7641	0.0127	99.633	71.9185	0.0921493
Cima8_cpx33	PHENO	VERM	46.7717	2.6743	5.7209	0.4694	8.1302	0.1436	13.0256	21.6084	0.5598	-0.0044	99.0995	74.066	0.0113313
Cima8_cpx34	PHENO	VERM	49.9262	1.8983	2.3642	0.0124	8.3628	0.1919	14.4509	21.8083	0.481	0.0002	99.4961	75.4921	-0.0314671
Cima8_cpx34	PHENO	VERM	47.6033	1.8162	5.9892	-0.0012	7.973	0.1488	14.2481	20.7307	0.5547	0.0004	99.0632	76.1084	0.0376284
Cima8_cpx34	PHENO	VERM	44.6781	2.5287	10.2471	-0.0026	8.2822	0.1304	12.6297	20.1795	0.7946	0.0114	99.479	73.1061	0.109303
Cima8_cpx34	PHENO	VERM	45.0141	2.3999	9.4997	-0.0115	8.2474	0.1408	12.9541	20.3056	0.7442	0.0065	99.3006	73.6835	0.0919325
Cima8_cpx34	PHENO	VERM	49.8521	1.8985	3.0515	0.0483	8.0517	0.1763	14.0838	21.4511	0.4185	0.0123	99.0439	75.7167	0.00622721
Cima8_cpx35	MICRO	VERM	50.0192	1.947	2.7041	0.0023	8.9802	0.2422	14.3625	21.0638	0.4788	-0.0041	99.7961	74.0327	-0.0157028
Cima8_cpx35	MICRO	VERM	49.4211	1.9554	3.5551	0.0695	7.9438	0.1781	14.3193	21.7513	0.5069	0.0059	99.7063	76.2654	-0.00573577
Cima8_cpx35	MICRO	VERM	48.2238	2.3754	4.075	0.1971	8.2823	0.1943	13.6933	21.7798	0.5603	0.0055	99.3867	74.6656	-0.0150271
Cima8_cpx35	MICRO	VERM	50.2078	1.7248	2.6092	0.0283	8.154	0.2028	14.5217	21.5609	0.4811	0.0061	99.4967	76.046	-0.012627
Cima8_cpx36	MICRO	VERM	48.0674	2.8497	4.258	0.016	8.6417	0.1947	13.4583	21.7627	0.5693	0.0002	99.8182	73.518	-0.0168444
Cima8_cpx36	MICRO	VERM	49.2306	1.1419	3.9202	0.0213	13.3531	0.3418	12.9277	18.304	0.4544	0.0277	99.7227	63.3136	0.0333579
Cima8_cpx36	MICRO	VERM	48.5612	2.3441	4.2807	0.0513	8.5694	0.1796	13.1642	20.5393	1.5092	0.0159	99.2148	73.2506	0.000608018
Cima8_cpx36	MICRO	VERM	48.9705	1.4914	3.4839	0.0525	9.6693	0.2265	14.13	20.2445	0.5012	0.0178	98.7876	72.2604	-0.00126136
Cima8_cpx37	MICRO	VERM	48.0027	2.2991	5.0474	0.0923	8.0798	0.1771	13.8832	20.9726	0.5472	0.0138	99.1152	75.3874	0.019569
Cima8_cpx37	MICRO	VERM	48.5419	2.3955	4.1755	0.0234	8.4196	0.1855	13.7417	21.7127	0.5377	0.0143	99.7478	74.4205	-0.00591087
Cima8_cpx37	MICRO	VERM	48.4006	2.4133	4.2049	0.0265	8.408	0.1875	13.8379	21.8347	0.4982	0.0097	99.8213	74.5793	-0.0117067
Cima8_cpx38	MICRO	VERM	47.4452	1.6915	7.9317	0.5545	6.92	0.1463	13.9617	20.1187	0.8828	0.0274	99.6798	78.2445	0.0947449
Cima8_cpx38	MICRO	VERM	50.1394	0.792	5.5746	0.133	7.9236	0.2165	14.7493	19.3934	0.9851	0.0324	99.9392	76.8422	0.0840346
Cima8_cpx38	MICRO	VERM	48.1804	1.7508	5.1102	0.1738	8.1876	0.1994	14.0566	21.3979	0.5438	0.0217	99.6222	75.3718	0.0152781
Cima8_cpx39	PHENO	OZ/SZ	47.6942	1.7446	7.2498	0.6511	6.857	0.1568	14.2016	20.5457	0.7198	0.0099	99.8305	78.6869	0.0739919
Cima8_cpx39	PHENO	OZ/SZ	45.5669	2.6074	9.7683	0.3226	6.8127	0.1197	13.4516	20.491	0.7098	0.0354	99.8854	77.8747	0.105248
Cima8_cpx39	PHENO	OZ/SZ	46.2306	1.8478	9.174	0.2947	6.7411	0.1225	14.3493	19.5414	0.6912	0.0104	99.0029	79.1427	0.112112
Cima8_cpx39	PHENO	OZ/SZ	50.0239	1.7662	2.4702	0.0243	8.2638	0.2034	14.6117	21.6141	0.478	0.0064	99.4621	75.9147	-0.0248273
Cima8_cpx40	MICRO	VERM	50.572	1.0222	4.6826	0.4301	6.9478	0.1693	16.412	19.4762	0.6583	0.0058	100.376	80.8092	0.0449344
Cima8_cpx40	MICRO	VERM	48.6964	1.8463	4.6251	0.4632	7.7825	0.179	14.088	21.757	0.5169	0.0112	99.9655	76.3419	0.00832011
Cima8_cpx40	MICRO	VERM	48.1672	2.2082	5.3543	0.5942	7.7771	0.1584	13.6537	21.7457	0.5162	0.03	100.205	75.7844	0.0198432
Cima8_cpx40	MICRO	VERM	47.3132	2.3655	5.6235	0.6149	8.0016	0.1747	13.3709	21.8549	0.5637	0.0106	99.8935	74.8666	0.00799692
Cima8_cpx41	MICRO	VERM	46.8685	2.6813	5.5823	0.5997	8.197	0.1801	13.2147	21.8163	0.5616	0.0318	99.7331	74.1855	-0.00366912
Cima8_cpx42	PHENO	VERM	48.2247	2.4945	4.1929	0.0434	8.5726	0.184	13.7525	21.7026	0.5183	0.0049	99.6904	74.0913	-0.0147875
Cima8_cpx42	PHENO	VERM	50.189	1.2357	2.8712	0.0541	7.9914	0.1841	14.9266	21.5646	0.4203	0.0349	99.4718	76.9031	-0.00754965
Cima8_cpx42	PHENO	VERM	49.9661	1.0048	3.6935	0.0616	8.3791	0.207	14.6055	21.0008	0.5114	0.0214	99.4512	75.6526	0.0202478
Cima8_cpx42	PHENO	VERM	47.4313	2.164	5.8505	0.3988	7.4415	0.1465	14.0431	21.389	0.5157	0.0178	99.3982	77.0852	0.0225317
Cima8_cpx42	PHENO	VERM	48.1938	2.5534	4.3162	0.0347	8.1912	0.1816	13.7206	21.783	0.5268	0.0127	99.514	74.9117	-0.00850143
Cima8_cpx43	MICRO	VERM	50.9959	1.3529	1.7459	0.0214	8.594	0.2139	14.2838	21.3407	0.4931	0.0096	99.051	74.7653	-0.00813266
Cima8_cpx43	MICRO	VERM	52.872	0.8449	0.8556	0.0022	8.5731	0.2155	14.8939	21.5435	0.4926	0.0161	100.309	75.5911	-0.00599929
Cima8_cpx43	MICRO	VERM	53.694	0.5532	0.8754	0.0043	8.6731	0.2124	14.3211	21.4872	0.6399	0.0126	100.473	74.6414	0.0240593
Cima8_cpx44	PHENO	VERM	48.1278	2.7139	4.0686	0.0207	8.5716	0.1949	13.5809	21.8683	0.5385	0.0008	99.686	73.8518	-0.0214379
Cima8_cpx44	PHENO	VERM	48.1062	2.4463	4.8448	0.1148	8.2996	0.1808	13.8442	21.4423	0.5751	0.0048	99.8588	74.8331	0.00195689
Cima8_cpx44	PHENO	VERM	48.7046	2.5473	4.0937	0.0358	8.2977	0.1706	13.6949	21.7543	0.5555	0.0142	99.8686	74.6326	-0.0049924
Cima8_cpx45	PHENO	NS	47.1706	1.9727	6.5394	0.5955	7.3977	0.1544	14.0011	20.8292	0.6408	0.021	99.3225	77.1365	0.0410431
Cima8_cpx45	PHENO	NS	47.6146	1.836	6.8298	0.346	8.3058	0.1833	14.8817	18.9612	0.6524	0.0212	99.632	76.1559	0.058741
Cima8_cpx45	PHENO	NS	49.289	1.9558	3.8956	0.2385	8.1953	0.1808	14.3615	21.4184	0.5475	0.0091	100.091	75.7507	-0.00315175
Cima8_cpx46	PHENO	VERM	48.5921	2.2577	4.0845	0.2533	8.0984	0.1931	13.9811	21.7392	0.5252	0.0203	99.745	75.475	-0.0103738
Cima8_cpx46	PHENO	VERM	51.2302	0.3976	4.5378	0.3304	4.9791	0.1274	16.2003	21.4447	0.7452	0.0217	100.014	85.294	0.0584821
Cima8_cpx46	PHENO	VERM	50.8995	0.4856	4.8605	0.3579	4.9451	0.116	16.0684	21.5833	0.6744	0.0198	100.01	85.2774	0.0618236
Cima8_cpx46	PHENO	VERM	50.252	1.3249	3.888	0.0746	8.1705	0.2252	16.0999	19.6298	0.493	0.0235	100.181	77.8398	0.0144301
Cima8_cpx47	PHENO	VERM	48.6995	2.2847	4.1831	0.0781	8.0719	0.1695	13.9867	21.783	0.5403	0.0155	99.8123	75.543	-0.00469441
Cima8_cpx47	PHENO	VERM	49.1014	1.8894	4.1865	0.1891	7.9875	0.1616	14.0281	21.9051	0.4912	0.0343	99.9741	75.791	0.00600856
Cima8_cpx47	PHENO	VERM	48.6784	1.8086	4.5537	0.2242	7.665	0.1611	14.5554	21.4292	0.5404	0.0226	99.6386	77.1952	0.00516792
Cima8_cpx47	PHENO	VERM	49.6959	1.0183	4.26	0.1473	9.7073	0.2095	14.2659	19.2365	0.8227	0.0438	99.407	72.3735	0.0390292
Cima8_cpx47	PHENO	VERM	48.75	2.2905	4.056	0.0846	7.8985	0.1726	13.893	21.9902	0.5323	0.0278	99.6956	75.819	-0.0055206
Cima8_cpx48	MICRO	VERM	48.1928	2.0579	4.9081	0.4392	7.7789	0.1587	14.4067	21.3907	0.5215	0.0014	99.8558	76.7518	0.00139941
Cima8_cpx48	MICRO	VERM	49.4572	1.0507	4.6216	0.0156	10.8952	0.2807	13.747	18.7427	0.8734	0.0016	99.6857	69.2231	0.047573
Cima8_cpx49	PHENO	VERM	48.2673	2.7082	3.9516	0.0191	8.7295	0.1812	13.6596	21.5953	0.5713	0.0262	99.7093	73.6102	-0.0218076
Cima8_cpx49	PHENO	VERM	52.2621	0.7179	0.6198	0.0078	9.5346	0.2239	14.9181	21.1305	0.471	0.0201	99.9059	73.6085	-0.0277056
Cima8_cpx49	PHENO	VERM	52.6894	0.495	0.2332	-0.0025	8.8667	0.1987	14.7396	22.3867	0.3835	0.0178	100.008	74.7685	-0.0311632
Cima8_cpx49	PHENO	VERM	52.8133	0.6302	0.3309	0.0055	9.2917	0.2377	14.5033	21.9868	0.3961	0.0123	100.208	73.562	-0.0217934
Cima8_cpx50	PHENO	NS	52.2362	0.707	4.0132	0.3411	13.1184	0.2078	25.7482	2.3172	0.4615	0.051	99.2015	77.7718	0.0587368
Cima8_cpx51	MICRO	VERM	52.5187	0.6515	0.7483	0.0018	8.3456	0.1979	15.8391	21.1758	0.4635	0.0072	99.9494	77.1855	-0.0259992
Cima8_cpx51	MICRO	VERM	50.3876	1.507	2.7061	0.0878	7.7794	0.1852	14.9086	21.4219	0.4541	0.0017	99.4393	77.3561	-0.00580854
Cima8_cpx52	PHENO	NS	48.7306	2.2581	3.993	0.0399	8.2329	0.1874	14.0093	21.8932	0.5495	0.0057	99.8996	75.2064	-0.0131195
Cima8_cpx52	PHENO	NS	50.7658	0.6894	3.1393	-0.0068	10.575	0.344	13.7708	20.0745	0.694	0.0063	100.052	69.8913	0.0276205
Cima8_cpx52	PHENO	NS	51.1219	0.4138	2.6037	-0.0056	10.9808	0.3727	13.9481	19.7105	0.7065	0.01	99.8624	69.3655	0.0214644
Cima8_cpx52	PHENO	NS	51.224	0.5759	2.5497	0.0099	12.138	0.3838	14.6123	18.0584	0.5983	0.0211	100.171	68.2133	0.0195519
Cima8_cpx52	PHENO	NS	47.6014	2.1026	6.0472	0.2081	7.9063	0.1676	13.8762	21.2654	0.5855	0.014	99.7742	75.7787	0.0307475
Cima8_cpx53	MICRO	VERM	49.7368	2.0585	3.6857	0.1859	8.3173	0.1991	14.211	21.5193	0.5194	0.0168	100.45	75.2827	0.000727206
Cima8_cpx53	MICRO	VERM	46.8339	2.8868	6.2609	0.3536	8.5955	0.1709	12.8589	21.316	0.6268	0.0092	99.9124	72.728	0.0232705
Cima8_cpx53	MICRO	VERM	47.1508	2.527	5.9327	0.357	8.3159	0.1833	13.3893	21.055	0.6041	-0.0069	99.5082	74.1611	0.0226546
Cima8_cpx53	MICRO	VERM	48.8991	1.8846	3.9106	0.3614	7.7599	0.1812	14.4486	21.4886	0.49	0.0107	99.4347	76.8471	-0.00599182
Cima8_cpx54	PHENO	VERM	50.3674	1.6461	2.037	0.0206	8.6038	0.2378	14.4408	21.8851	0.4627	0.0206	99.7219	74.9496	-0.032382
Cima8_cpx54	PHENO	VERM	47.0618	2.3135	6.1755	0.0163	8.6368	0.1818	13.1772	21.8163	0.4984	-0.0084	99.869	73.1162	0.0236703
Cima8_cpx54	PHENO	VERM	48.0975	1.812	4.86	0.0246	8.1011	0.1733	13.8863	21.9355	0.4565	0.0204	99.3673	75.3427	0.00842812
Cima8_cpx54	PHENO	VERM	48.0329	1.9275	5.4837	0.3027	7.763	0.1748	14.3932	20.9383	0.5983	0.0259	99.6403	76.7716	0.0211675
Cima8_cpx55	MICRO	VERM	48.6458	1.8137	4.6609	0.5583	7.6133	0.1807	14.3529	21.5059	0.509	0.0274	99.8679	77.0675	0.00751102
Cima8_cpx56	MICRO	VERM	47.9452	2.5296	4.5024	0.2596	8.3485	0.1706	13.5749	21.8503	0.5649	0.0166	99.7628	74.3494	-0.0129698
Cima8_cpx56	MICRO	VERM	48.7657	2.1491	4.4308	0.1577	8.1974	0.1816	13.7227	21.5869	0.5473	0.0218	99.761	74.9003	0.0114586
Cima8_cpx56	MICRO	VERM	50.1039	1.8681	3.3289	0.0708	8.2705	0.1921	14.3156	21.6865	0.4949	0.0099	100.341	75.5234	-0.000344979
Cima8_cpx56	MICRO	VERM	48.2056	2.1065	4.3087	0.0762	8.5876	0.1979	13.9462	21.4142	0.5018	0.0044	99.3492	74.3255	-0.00713856
Cima8_cpx56	MICRO	VERM	49.5338	2.0642	3.2219	0.0504	8.1408	0.1722	14.1726	21.7869	0.5172	0.0115	99.6715	75.6298	-0.0122641
Cima8_cpx59	MICRO	NS	46.7696	2.9735	5.5456	0.0161	8.7671	0.1966	13.0223	21.6361	0.6228	0.0245	99.5742	72.5862	-0.00403748
Cima8_cpx59	MICRO	NS	48.6964	1.6446	7.5677	0.3909	6.9062	0.1542	15.2677	19.1722	0.6385	0.0306	100.469	79.7605	0.103084
Cima8_cpx59	MICRO	NS	44.2578	3.5977	10.6751	0.3651	4.9001	0.1001	13.4143	21.4815	0.6301	0.0206	99.4424	82.9931	0.10089
Cima8_cpx59	MICRO	NS	47.1352	1.9066	7.7562	0.5315	7.2344	0.138	13.7336	20.7765	0.6766	0.0257	99.9144	77.1899	0.0783168
Cima8_cpx59	MICRO	NS	48.5394	2.5887	4.2159	0.0335	8.1767	0.1833	13.9571	21.9951	0.5581	0.0274	100.275	75.2645	-0.016543
Cima8_cpx60	MICRO	VERM	50.4745	1.0471	4.5319	0.5513	6.6828	0.1691	16.2774	19.7329	0.6089	0.0308	100.107	81.28	0.0419627
Cima8_cpx60	MICRO	VERM	47.2215	1.8498	7.7405	0.5816	6.7568	0.1453	14.2457	20.1818	0.6969	0.0223	99.442	78.9842	0.0840408
Cima8_cpx60	MICRO	VERM	47.7782	2.0965	5.5913	0.4328	7.734	0.1859	13.5225	21.8063	0.5281	0.0016	99.6774	75.7091	0.024521
Cima8_cpx60	MICRO	VERM	47.128	2.2805	7.5788	0.4517	7.4957	0.1471	13.6376	20.2791	0.7065	0.0187	99.7238	76.4331	0.0779672
Cima8_cpx60	MICRO	VERM	50.6891	1.7403	2.3815	0.021	8.361	0.21	14.7012	21.6378	0.4991	0.0113	100.252	75.8124	-0.0191982
Cima8_cpx61	MICRO	VERM	47.168	2.8482	4.5563	0.0378	8.5848	0.2018	13.3337	21.6073	0.5524	0.0065	98.8968	73.4655	-0.019707
Cima8_cpx61	MICRO	VERM	47.4702	0.9413	7.6293	0.0371	8.9281	0.2003	13.7686	19.1791	0.9719	0.005	99.1308	73.3266	0.0965766
Cima8_cpx61	MICRO	VERM	48.5256	1.3017	7.3953	0.053	8.1193	0.1675	13.5495	20.2951	0.7023	0.0173	100.127	74.8415	0.111084
Cima8_cpx62	PHENO	NS	50.4764	1.7683	2.1704	0.0245	8.4334	0.2371	14.5252	21.6399	0.4892	0.0078	99.7723	75.4314	-0.0246643
Cima8_cpx62	PHENO	NS	48.6675	1.9854	4.7267	0.253	8.204	0.1878	14.0851	21.2981	0.5058	0.0179	99.9313	75.3723	0.013966
Cima8_cpx62	PHENO	NS	49.356	1.0393	5.4063	0.0221	11.0717	0.3574	13.3512	18.3025	1.0619	0.0043	99.9727	68.25	0.072032
Cima8_cpx62	PHENO	NS	49.189	1.0313	5.3077	0.0202	11.1393	0.3562	13.2435	18.4462	1.0185	-0.0142	99.7377	67.9418	0.0679947
Cima8_cpx62	PHENO	NS	45.7984	2.3825	8.7179	0.2268	7.4315	0.1365	13.2776	20.3014	0.7165	0.0158	99.0048	76.1046	0.0909904
Cima8_cpx63	PHENO	VERM	48.2656	2.2514	4.7324	0.5964	8.0902	0.1838	13.6649	21.7818	0.5464	0.0204	100.133	75.0681	0.000271434
Cima8_cpx63	PHENO	VERM	51.2764	0.7048	4.0208	0.2279	7.5879	0.1798	15.1357	20.1073	0.9575	0.0431	100.241	78.0498	0.0528296
Cima8_cpx63	PHENO	VERM	49.1106	1.4084	6.046	0.6064	6.7564	0.1496	14.9368	20.732	0.6556	0.0229	100.425	79.7607	0.0586055
Cima8_cpx64	MICRO	VERM	49.7812	1.7272	3.399	0.0105	8.2257	0.2002	13.7063	21.5787	0.4003	0.0118	99.0409	74.813	0.0211129
Cima8_cpx64	MICRO	VERM	52.1831	0.8975	1.4348	0.0044	9.404	0.3162	16.273	18.7102	0.4319	0.0071	99.6622	75.5182	-0.000961264
Cima8_cpx67	PHENO	VERM	50.2526	0.7197	4.4003	0.0942	9.1308	0.1869	14.33	20.2721	0.8228	0.0342	100.244	73.6678	0.0440066
Cima8_cpx67	PHENO	VERM	49.6072	1.7822	3.3764	0.0772	8.2141	0.1833	14.2641	21.8885	0.5004	0.0168	99.9102	75.5832	-0.0093014
Cima8_cpx67	PHENO	VERM	48.1861	2.3263	3.8661	0.0719	8.1921	0.1686	13.9856	21.9631	0.5137	0.0011	99.2746	75.2675	-0.0261132
Cima8_cpx68	PHENO	VERM	49.6172	1.9399	2.7176	0.0104	8.0968	0.1803	14.3197	21.8602	0.5184	0.0125	99.2729	75.9189	-0.0245873
Cima8_cpx68	PHENO	VERM	52.7272	0.6703	0.7887	0.0077	8.6188	0.2147	14.6916	22.0219	0.5209	0.0206	100.282	75.239	-0.0134352
Cima8_cpx68	PHENO	VERM	47.8697	2.5968	4.2136	0.035	8.2287	0.2108	13.8431	21.6916	0.6187	0.0042	99.312	74.9928	-0.0231506
Cima8_cpx69	PHENO	VERM	46.6848	2.3967	6.1502	0.7957	7.7659	0.1679	13.6301	21.4878	0.6154	0.0119	99.7064	75.7791	0.00684939
Cima8_cpx69	PHENO	VERM	44.0043	3.1033	10.3888	0.1305	7.8252	0.1359	12.7746	20.141	0.7627	0.0225	99.2888	74.4251	0.0947947
Cima8_cpx69	PHENO	VERM	36.7869	0.1004	0.1484	0.0019	28.1187	0.484	34.1571	0.5928	0.0061	0.1014	100.498	68.4084	-0.68713
Cima8_cpx69	PHENO	VERM	46.804	2.0247	8.1872	0.0535	7.1969	0.1354	13.2367	20.2837	0.6909	0.0222	98.635	76.6278	0.111967
Cima8_cpx69	PHENO	VERM	49.1714	1.9758	3.8133	0.2914	7.6436	0.158	14.4537	21.7434	0.4741	0.0073	99.732	77.1209	-0.0057326
Cima8_cpx70	PHENO	VERM	49.6957	1.9166	2.8637	0.0493	8.0115	0.1985	14.5397	21.9546	0.4905	0.0174	99.7376	76.3881	-0.0260868
Cima8_cpx70	PHENO	VERM	49.0905	2.0889	3.6206	0.2414	8.094	0.1873	14.0438	21.8092	0.5567	0.016	99.7484	75.5678	-0.0127337
Cima8_cpx70	PHENO	VERM	48.5711	2.1682	4.3404	0.3143	8.1623	0.1984	13.7748	21.8092	0.5309	0.0088	99.8786	75.0519	-0.00155851
Cima8_cpx70	PHENO	VERM	48.5765	1.9565	6.1198	0.1832	7.6127	0.1612	13.6455	20.7124	0.526	0.0349	99.5286	76.1635	0.0768425
Cima8_cpx70	PHENO	VERM	49.3556	2.0558	3.0843	0.0228	8.7877	0.2112	14.1374	21.832	0.49	0.0084	99.9851	74.1454	-0.0276742
Cima8_cpx71	PHENO	VERM	48.6774	1.8393	4.7823	0.3924	7.7098	0.1681	14.1741	21.0173	0.4928	0.0154	99.269	76.6203	0.027091
Cima8_cpx71	PHENO	VERM	49.1674	2.0471	3.6058	0.2891	8.2381	0.1942	14.2203	21.8173	0.512	0.0065	100.098	75.4724	-0.0174033
Cima8_cpx71	PHENO	VERM	48.8829	2.0756	3.6883	0.3348	8.173	0.1997	14.2425	21.7313	0.5017	0.0263	99.856	75.6478	-0.019919
Cima8_cpx71	PHENO	VERM	49.7615	1.7906	3.2003	0.1502	8.1253	0.1996	14.5882	21.5797	0.4602	0.0194	99.875	76.1932	-0.0118333
Cima8_cpx72	MICRO	VERM	48.3605	2.0686	4.9011	0.4317	8.3178	0.2085	14.3589	20.5985	0.6286	0.0093	99.8835	75.4738	0.00842734
Cima8_cpx73	MICRO	NS	49.6879	1.7811	3.2184	0.1225	8.1029	0.195	14.6705	21.3313	0.488	0.0137	99.6113	76.345	-0.0100721
Cima8_cpx73	MICRO	NS	48.731	1.521	6.2207	0.2357	7.3089	0.1616	15.6977	19.5537	0.6288	0.0057	100.065	79.2899	0.0541656
Cima8_cpx73	MICRO	NS	49.5318	1.2407	5.2515	0.3374	7.1352	0.1603	16.2057	19.2839	0.5894	0.0145	99.7503	80.1929	0.0457028
Cima8_cpx73	MICRO	NS	45.0911	3.0169	10.5318	0.273	7.7783	0.1354	12.6495	19.7349	0.8256	0.0136	100.05	74.3521	0.126668
Cima8_cpx73	MICRO	NS	47.4368	2.4758	5.3274	0.6116	8.1091	0.1547	13.519	21.6415	0.5481	0.0071	99.831	74.8227	0.00169023
Cima8_cpx74	PHENO	VERM	49.102	2.0662	3.4274	0.037	8.189	0.195	14.1233	21.6064	0.4845	0.0148	99.2454	75.4564	-0.0107291
Cima8_cpx74	PHENO	VERM	49.477	2.087	4.1958	0.1399	8.1947	0.1808	14.0525	21.5537	0.5051	0.006	100.392	75.3503	0.0138504
Cima8_cpx74	PHENO	VERM	49.0004	2.09	3.821	0.052	8.4026	0.187	14.1002	21.6499	0.615	0.0113	99.9295	74.9457	-0.0123444
Cima8_cpx74	PHENO	VERM	49.1032	2.0322	3.5712	0.0423	8.4328	0.1901	13.9111	21.534	0.5868	-0.0112	99.3924	74.6234	-0.00665261

## Sheet: Table S5
Table S.5a. MICROPROBE ANALYSES OF ILMENITE AND TITANOMAGNETITE FROM SIX CIMA HAWAIITES.													Table S.5b. Fe-Ti OXIDE THERMOMETRY AND OXYBAROMETRY (GHIORSO AND EVANS, 2008) RESULTS FOR ALL POSSIBLE PAIRS OF ILMENITE AND TITANOMAGNETITE.									Table S.5c. COMPOSITION (WT%) OF ONSET ILMENITE AND TITANOMAGNETITE PAIR THAT PASS THE BACON & HIRSCHMANN (1988) TEST FOR EQUILIBRIUM.
Comment	SiO2	TiO2	Al2O3	Fe2O3	V2O3	Cr2O3	FeO	MnO	MgO	CaO	adjusted total		Titanomagnetite	ilmenite	T°C	∆NNO	∆QFM	log(Mg/Mn) ilm	log(Mg/Mn) tmte	ln fO2			Cima-3		Cima-8		Cima-9		Cima-4b		Cima-4a		Cima-5
Cima-1_tmte 2	0.2096	21.2616	2.2374	26.6437	0.4078	0.0485	42.601	0.8651	4.4434	0.2211	98.939		Cima-3_tmte 38	Cima-3_ilm 26	1004.26	-1.74213	-0.98213	0.575072	0.393146	-27.6516		oxide wt%	ilm 26	tmte 38	ilm 35	tmte 16	ilm 5	tmte 16	ilm 24	tmte 8	ilm 23	tmte 13	ilm 2	tmte 10
Cima-1_tmte 3	0.1399	21.0375	2.5595	26.9933	0.4063	0.1502	42.272	0.8426	4.4163	0.2722	99.0898		Cima-3_tmte 38	Cima-3_ilm 34	982.372	-1.8489	-1.0889	0.533885	0.393146	-28.6635		SiO2	0.2106	0.1319	0.1092	0.0175	0.0907	0.0727	0.1902	0.0864	0.1453	0.1005	0.0748	0.1198
Cima-1_tmte 7	0.1422	21.9808	1.8126	25.5072	0.4404	0.0434	43.8505	0.8644	3.888	0.236	98.7656		Cima-3_tmte 46	Cima-3_ilm 26	981.467	-1.73971	-0.979709	0.575072	0.414655	-28.4443		TiO2	49.8769	27.1542	50.6413	27.982	49.8133	26.4329	48.482	26.7966	49.0388	26.1284	49.7917	26.3007
Cima-1_tmte 12	0.2202	21.3171	2.7722	25.4204	0.4199	0.5551	43.0966	0.8029	4.1499	0.2772	99.0314		Cima-3_tmte 22	Cima-3_ilm 26	979.403	-1.78855	-1.02855	0.575072	0.362905	-28.6305		Al2O3	0.1247	1.2907	0.0524	1.1263	0.0822	1.2608	0.1104	1.9857	0.0844	2.0844	0.2357	1.6413
Cima-1_tmte 17	0.1449	21.3595	2.8465	25.3212	0.3605	0.1519	43.1134	0.8097	4.1145	0.2234	98.4456		Cima-3_tmte 35	Cima-3_ilm 26	970.368	-1.72971	-0.969705	0.575072	0.529485	-28.8207		Fe2O3	6.91191	14.0274	6.10812	13.4922	6.75067	16.4882	8.28483	14.0219	7.63276	15.726	7.63045	16.8102
Cima-1_tmte 18	0.1509	21.0613	2.6887	26.3933	0.414	0.3567	42.7819	0.7567	4.3324	0.2172	99.1531		Cima-3_tmte 46	Cima-3_ilm 2	967.887	-1.84321	-1.08321	0.615104	0.414655	-29.1723		V2O3	0.451	0.6173	0.4347	0.5204	0.3913	0.5644	0.4597	0.6093	0.3277	0.6165	0.3384	0.4666
Cima-1_tmte 19	0.1931	20.7608	2.4763	26.3388	0.4126	0.4996	42.7491	0.8296	3.9517	0.2349	98.4464		Cima-3_tmte 38	Cima-3_ilm 14	967.65	-1.93735	-1.17735	0.480136	0.393146	-29.3978		Cr2O3	0.0028	0.0233	0.0436	0.3192	0.0217	0.2355	-0.0354	0.8754	0.0004	0.7239	0.0042	0.089
Cima-1_tmte 22	0.156	20.8361	2.2497	27.3857	0.4001	0.2746	42.2322	0.9716	4.0602	0.3179	98.884		Cima-3_tmte 46	Cima-3_ilm 34	960.295	-1.84708	-1.08708	0.533885	0.414655	-29.4598		FeO	39.258	53.4728	37.6768	51.2029	37.3406	51.3489	38.9343	52.5323	39.0987	50.5551	36.8905	50.9164
Cima-1_tmte 24	0.173	21.6366	2.648	25.5499	0.3786	0.1265	43.7652	0.8743	4.2072	0.1537	99.513		Cima-3_tmte 22	Cima-3_ilm 34	958.309	-1.89581	-1.13581	0.533885	0.362905	-29.6455		MnO	0.7894	0.8034	0.7569	0.7886	0.8399	0.8182	0.7348	0.7747	0.8201	0.6859	0.7834	0.7714
Cima-1_tmte 27	0.091	20.6967	2.8615	25.8288	0.3754	1.5281	42.788	0.8461	4.2098	0.1637	99.3889		Cima-3_tmte 35	Cima-3_ilm 2	956.799	-1.83398	-1.07398	0.615104	0.529485	-29.5591		MgO	1.686	1.1286	3.0327	2.8193	2.8018	1.8751	1.1836	1.7437	1.6011	2.4638	2.8305	2.3214
Cima-1_tmte 28	0.1561	21.5246	2.3878	26.0555	0.4007	0.1152	43.4289	0.8816	3.9425	0.2724	99.1652		Cima-3_tmte 38	Cima-3_ilm 21	955.455	-2.03933	-1.27933	0.532702	0.393146	-30.082		CaO	0.1763	0.0765	0.2796	0.1201	0.1982	0.1741	0.2005	0.0779	0.155	0.1527	0.1365	0.146
Cima-1_tmte 29	0.2129	21.4456	1.7485	26.2523	0.3212	0.2603	43.0785	0.9334	3.9363	0.2668	98.4559		Cima-3_tmte 46	Cima-3_ilm 14	946.046	-1.93608	-1.17608	0.480136	0.414655	-30.197		adjusted total	99.4874	98.7262	99.1353	98.3884	98.3305	99.2708	98.545	99.5039	98.9043	99.2371	98.7161	99.5827
Cima-1_tmte 30	0.1346	20.9262	2.8281	26.3817	0.4542	0.4653	42.7262	0.8201	4.4947	0.136	99.3671		Cima-3_tmte 22	Cima-3_ilm 14	944.112	-1.98473	-1.22473	0.480136	0.362905	-30.3823			Fe-Ti two-oxide thermometry and oxybarometry
Cima-1_tmte 33	0.1069	21.8484	2.1768	24.803	0.4336	0.1234	43.6534	0.8281	4.0889	0.1438	98.2062		Cima-3_tmte 39	Cima-3_ilm 26	942.462	-1.74798	-0.987978	0.575072	0.403415	-29.8997		1T °C	1004		955		985		1098		1044		972
Cima-1_tmte 34	0.1639	20.751	2.4635	27.1276	0.4632	0.1157	41.9547	0.7901	4.1531	0.3474	98.3302		Cima-3_tmte 46	Cima-3_ilm 21	934.152	-2.03908	-1.27908	0.532702	0.414655	-30.8883		1∆QFM	-1		-1.3		-1		-0.3		-0.4		-0.8		-0.8
Cima-1_tmte 36	0.2411	21.4112	1.9746	26.6549	0.3754	0.0373	42.9309	0.8962	4.019	0.3262	98.8669		Cima-3_tmte 22	Cima-3_ilm 21	932.255	-2.08772	-1.32772	0.532702	0.362905	-31.0736		2Fe3+/FeT	0.11		0.1		0.11		0.14		0.13		0.11		0.0150555
Cima-1_tmte 37	0.1336	21.4347	2.6984	24.922	0.3859	0.5754	44.0372	0.8676	3.9384	0.1001	99.0932		Cima-3_tmte 39	Cima-3_ilm 2	929.368	-1.85365	-1.09365	0.615104	0.403415	-30.6465		1Determined using the geotheromometer and oxybarometer of Ghiorso & Evans (2008)
Cima-1_tmte 38	0.151	21.0854	2.7204	26.7889	0.3939	0.068	42.6882	0.7783	4.3063	0.2594	99.2398		Cima-3_tmte 39	Cima-3_ilm 34	922.422	-1.85643	-1.09643	0.533885	0.403415	-30.9244		2Fe3+/FeT ratios are calculated using the model of Kress & Carmichael (1991)
													Cima-3_tmte 20	Cima-3_ilm 28	921.97	-1.92766	-1.16766	0.307612	0.209594	-31.1063
Comment	SiO2	TiO2	Al2O3	Fe2O3	V2O3	Cr2O3	FeO	MnO	MgO	CaO	adjusted total		Cima-3_tmte 22	Cima-3_ilm 35	917.62	-2.15438	-1.39438	0.42608	0.362905	-31.8002
Cima2_mag2	0.0802	27.7967	1.8177	13.7589	0.4443	0.1975	52.3897	0.8459	2.4434	0.0723	99.8467		Cima-3_tmte 39	Cima-3_ilm 14	908.915	-1.94644	-1.18644	0.480136	0.403415	-31.6691
Cima2_mag3	0.0617	27.4088	1.66	13.6135	0.458	0.3021	52.3378	0.8058	1.652	0.1973	98.4969		Cima-3_tmte 39	Cima-3_ilm 21	897.497	-2.05122	-1.29122	0.532702	0.403415	-32.3744
Cima2_mag5	0.1094	26.9357	1.4154	15.8223	0.4621	0.1152	50.695	0.8559	2.5452	0.1969	99.1531		Cima-3_tmte 35	Cima-3_ilm 23	896.799	-2.23689	-1.47689	0.654983	0.529485	-32.8307
Cima2_mag6	0.108	27.5774	1.0014	14.4659	0.3742	0.1087	52.0953	0.8477	2.115	0.1147	98.8082		Cima-3_tmte 29	Cima-3_ilm 23	888.43	-2.2037	-1.4437	0.654983	0.603956	-33.1006
Cima2_mag7	0.0012	26.3892	1.227	16.9158	0.3666	0.0714	50.2835	0.8754	2.2383	0.1949	98.5633		Cima-3_tmte 4	Cima-3_ilm 23	885.28	-2.20283	-1.44283	0.654983	0.580185	-33.2303
Cima2_mag8	0.082	26.7735	1.5019	15.9691	0.4814	0.1997	50.5084	0.795	2.576	0.1993	99.0863		Cima-3_tmte 46	Cima-3_ilm 4	871.837	-2.48673	-1.72673	0.611625	0.414655	-34.4544
Cima2_mag9	0.0899	27.2324	0.7104	14.9098	0.4384	0.1664	51.9146	0.8423	1.9668	0.0833	98.3543		Cima-3_tmte 48	Cima-3_ilm 23	869.328	-2.25865	-1.49865	0.654983	0.595628	-34.037
Cima2_mag10	0.0902	27.1002	1.4945	15.7115	0.4093	0.0482	51.068	0.8731	2.4806	0.182	99.4578		Cima-3_tmte 35	Cima-3_ilm 4	861.39	-2.48054	-1.72054	0.611625	0.529485	-34.8927
Cima2_mag11	0.0776	26.4058	1.3381	16.718	0.3931	0.1081	50.8514	0.796	2.1274	0.1836	98.9992		Cima-3_tmte 35	Cima-3_ilm 10	848.484	-2.58612	-1.82612	0.665194	0.529485	-35.7068
Cima2_mag14	0.0716	27.1229	1.6131	15.3466	0.4084	0.1462	51.3906	0.8498	2.3109	0.1752	99.4353		Cima-3_tmte 8	Cima-3_ilm 23	843.878	-2.2599	-1.4999	0.654983	0.578044	-35.1625
Cima2_mag16	0.067	27.1421	1.9713	14.5804	0.4698	0.103	52.0623	0.865	1.8689	0.1832	99.313		Cima-3_tmte 12	Cima-3_ilm 10	843.042	-2.53306	-1.77306	0.665194	0.613313	-35.8293
Cima2_mag17	0.0597	27.4144	1.4924	14.7198	0.4616	0.1532	51.6015	0.8728	2.435	0.1171	99.3275		Cima-3_tmte 29	Cima-3_ilm 10	840.494	-2.55444	-1.79444	0.665194	0.603956	-35.994
Cima2_mag18	0.0895	27.0883	1.3151	15.4609	0.3855	0.0595	51.1504	0.8454	2.3939	0.1492	98.9379		Cima-3_tmte 39	Cima-3_ilm 4	838.604	-2.50279	-1.74279	0.611625	0.403415	-35.961
Cima2_mag19	0.0998	26.1672	1.6803	16.9189	0.3705	0.0677	51.2321	0.8763	2.0794	0.0956	99.5879		Cima-3_tmte 4	Cima-3_ilm 10	837.757	-2.55361	-1.79361	0.665194	0.580185	-36.1166
Cima2_mag20	0.0758	27.0488	1.3637	15.1668	0.3862	0.1084	51.2916	0.8966	2.2249	0.1355	98.6983		Cima-3_tmte 48	Cima-3_ilm 10	823.149	-2.6099	-1.8499	0.665194	0.595628	-36.9218
Cima2_mag21	0.0113	27.1921	1.3475	15.3261	0.4733	0.1612	51.0922	0.8154	2.4633	0.1525	99.0351		Cima-3_tmte 8	Cima-3_ilm 10	800.371	-2.61223	-1.85223	0.665194	0.578044	-38.0177
Cima2_mag22	0.0805	27.6818	1.4114	14.1353	0.4442	0.042	51.8862	0.9062	2.4137	0.0916	99.093
Cima2_mag25	0.0859	28.4769	1.6299	11.8823	0.4614	0.189	52.4694	0.8779	2.4048	0.1155	98.5931		Cima-4a_tmte13	Cima-4a_ilm23	1044.18	-1.11209	-0.352091	0.536038	0.472616	-24.87
Cima2_mag27	0.0913	26.5334	1.3562	15.9877	0.4404	0.1763	50.7293	0.8445	2.289	0.1419	98.5898		Cima-4a_tmte13	Cima-4a_ilm18	1025.08	-1.24553	-0.485528	0.595836	0.472616	-25.8036
Cima2_mag28	0.0883	26.8545	1.454	15.5371	0.3495	0.0383	52.354	0.8598	1.8199	0.049	99.4043		Cima-4a_tmte31	Cima-4a_ilm25	1014.89	-1.4544	-0.694398	0.731065	0.608096	-26.6265
Cima2_mag29	0.1643	27.3248	1.3892	14.8157	0.3671	0.0354	51.8154	0.8309	2.3195	0.1157	99.178		Cima-4a_tmte42	Cima-4a_ilm25	1012.33	-1.40386	-0.643859	0.731065	0.609895	-26.5968
Cima2_mag31	0.0519	26.5013	1.3826	16.2719	0.4437	0.0929	50.7912	0.9014	2.0772	0.1838	98.6981		Cima-4a_tmte17	Cima-4a_ilm29	1010.99	-1.64615	-0.886147	0.795248	0.691092	-27.2003
Cima2_mag32	0.13	26.5318	1.8129	15.8102	0.4535	0.1608	51.0307	0.8578	2.2826	0.1472	99.2174		Cima-4a_tmte20	Cima-4a_ilm25	1007.98	-1.43828	-0.67828	0.731065	0.640196	-26.8243
Cima2_mag34	0.127	25.7774	1.444	17.4644	0.4198	0.0939	50.2731	0.907	2.0218	0.195	98.7235		Cima-4a_tmte19	Cima-4a_ilm25	1006.42	-1.46544	-0.705441	0.731065	0.620861	-26.9403
Cima2_mag36	0.0598	27.1561	1.2956	15.5356	0.4471	0.1247	51.2778	0.8688	2.5187	0.1019	99.386		Cima-4a_tmte3	Cima-4a_ilm25	998.11	-1.44144	-0.681438	0.731065	0.557318	-27.1716
Cima2_mag37	0.052	26.2422	1.8876	16.4994	0.488	0.3407	50.1223	0.8303	2.5259	0.1978	99.1864		Cima-4a_tmte13	Cima-4a_ilm30	996.49	-1.41592	-0.655924	0.630919	0.472616	-27.1692
Cima2_mag39	0.0531	26.8561	1.6022	15.7047	0.3143	0.0454	51.4846	0.8253	2.2228	0.1019	99.2106		Cima-4a_tmte29	Cima-4a_ilm29	995.052	-1.5976	-0.837598	0.795248	0.691364	-27.6377
Cima2_mag40	0.1207	26.2975	1.87	16.1825	0.5091	0.1944	50.8217	0.7985	2.258	0.1705	99.2229		Cima-4a_tmte16	Cima-4a_ilm25	994.631	-1.41193	-0.651933	0.731065	0.580066	-27.2248
Cima2_mag41	-0.4915	27.5614	1.8316	15.565	0.3872	0.1405	51.696	0.9086	1.9022	0.184	99.6852		Cima-4a_tmte28	Cima-4a_ilm25	994.357	-1.51221	-0.75221	0.731065	0.571193	-27.4653
Cima2_mag42	0.1207	26.9854	1.4065	15.3433	0.421	0.2681	51.5467	0.8833	2.0441	0.1893	99.2084		Cima-4a_tmte9	Cima-4a_ilm25	990.614	-1.44681	-0.686805	0.731065	0.613765	-27.4458
Cima2_mag44	0.1234	28.2126	0.7295	13.2101	0.2953	0.0192	52.8576	0.8506	1.8946	0.1089	98.3018		Cima-4a_tmte32	Cima-4a_ilm25	989.729	-1.41509	-0.655093	0.731065	0.670596	-27.404
Cima2_mag45	0.0695	26.0892	1.3196	16.7282	0.4854	0.2713	51.0285	0.8496	1.91	0.1212	98.8723		Cima-4a_tmte3	Cima-4a_ilm30	989.723	-1.43531	-0.675308	0.630919	0.557318	-27.4507
Cima2_mag46	0.0659	27.0982	2.0137	15.2299	0.478	0.1974	51.4364	0.8259	2.5611	0.1287	100.035		Cima-4a_tmte15	Cima-4a_ilm29	987.098	-1.60437	-0.844368	0.795248	0.720268	-27.9326
Cima2_mag48	0.0739	27.1062	1.0582	15.8644	0.404	0.0846	51.5967	0.87	2.2933	0.0954	99.4466		Cima-4a_tmte22	Cima-4a_ilm25	986.879	-1.46988	-0.709877	0.731065	0.671004	-27.6307
Cima2_mag49	-0.5821	27.5602	1.0273	15.8632	0.436	0.1331	51.2187	0.8868	2.094	0.0915	98.7287		Cima-4a_tmte31	Cima-4a_ilm29	986.582	-1.62073	-0.860729	0.795248	0.608096	-27.9885
Cima2_mag50	0.1127	26.788	1.7759	15.0657	0.4742	0.1194	51.1433	0.8391	2.3158	0.1269	98.761		Cima-4a_tmte16	Cima-4a_ilm30	986.324	-1.4058	-0.645803	0.630919	0.580066	-27.5027
													Cima-4a_tmte28	Cima-4a_ilm30	986.091	-1.50583	-0.745832	0.630919	0.571193	-27.7413
Comment	SiO2	TiO2	Al2O3	Fe2O3	V2O3	Cr2O3	FeO	MnO	MgO	CaO	adjusted total		Cima-4a_tmte18	Cima-4a_ilm29	985.542	-1.5748	-0.814799	0.795248	0.697518	-27.9196
Cima-3_ilm 2	0.1235	49.4487	0.0667	6.4653	0.4168	-0.0001	38.6355	0.8147	1.9082	0.2193	98.0986		Cima-4a_tmte42	Cima-4a_ilm29	984.156	-1.57065	-0.810654	0.795248	0.609895	-27.9592
Cima-3_ilm 4	0.2782	50.2526	0.1046	5.11467	0.356	0.0392	39.4557	0.8395	1.9504	0.221	98.6118		Cima-4a_tmte20	Cima-4a_ilm29	980.098	-1.60494	-0.844942	0.795248	0.640196	-28.1828
Cima-3_ilm 10	0.149	50.4521	0.0251	4.76204	0.3563	-0.0207	39.4492	0.8285	2.1773	0.2002	98.3791		Cima-4a_tmte19	Cima-4a_ilm29	978.429	-1.63224	-0.872242	0.795248	0.620861	-28.3054
Cima-3_ilm 14	0.0504	49.6866	0.049	5.90492	0.3345	-0.0059	39.8871	0.8477	1.4549	0.189	98.3983		Cima-4a_tmte12	Cima-4a_ilm25	972.606	-1.46442	-0.704418	0.731065	0.573003	-28.1286
Cima-3_ilm 20	0.0958	49.0599	0.0423	6.90775	0.3087	-0.015	38.6398	0.8131	1.8132	0.3738	98.0392		Cima-4a_tmte4	Cima-4a_ilm29	970.19	-1.59864	-0.838638	0.795248	0.702559	-28.5253
Cima-3_ilm 21	0.1137	49.8426	0.0599	5.89843	0.41	0.0033	39.4193	0.8807	1.7062	0.1415	98.4755		Cima-4a_tmte14	Cima-4a_ilm29	969.782	-1.64495	-0.88495	0.795248	0.680007	-28.6468
Cima-3_ilm 23	0.1061	50.2614	0.0272	5.44624	0.3871	-0.0197	39.2842	0.8203	2.1059	0.1848	98.6037		Cima-4a_tmte7	Cima-4a_ilm25	967.619	-1.45904	-0.699038	0.731065	0.65326	-28.2974
Cima-3_ilm 26	0.2106	49.8769	0.1247	6.91191	0.451	0.0028	39.258	0.7894	1.686	0.1763	99.4874		Cima-4a_tmte11	Cima-4a_ilm25	967.37	-1.49798	-0.737979	0.731065	0.672497	-28.3961
Cima-3_ilm 28	0.1055	49.3054	0.03	5.73036	0.3415	0.0652	40.4413	0.8981	1.0361	0.1301	98.0834		Cima-4a_tmte36	Cima-4a_ilm29	967.258	-1.60233	-0.842334	0.795248	0.707799	-28.6406
Cima-3_ilm 34	0.1494	49.8271	0.0647	6.12174	0.3968	-0.0397	39.963	0.7812	1.5175	0.0946	98.8762		Cima-4a_tmte16	Cima-4a_ilm29	966.98	-1.58004	-0.820044	0.795248	0.580066	-28.5994
Cima-3_ilm 35	0.0831	49.8716	0.0845	5.63359	0.3296	0.001	40.1069	0.9005	1.3647	0.1554	98.5309		Cima-4a_tmte28	Cima-4a_ilm29	966.842	-1.6795	-0.919498	0.795248	0.571193	-28.8334
													Cima-4a_tmte31	Cima-4a_ilm14	966.195	-1.75492	-0.994924	0.738099	0.608096	-29.0308
Comment	SiO2	TiO2	Al2O3	Fe2O3	V2O3	Cr2O3	FeO	MnO	MgO	CaO	adjusted total		Cima-4a_tmte43	Cima-4a_ilm29	965.227	-1.68556	-0.925565	0.795248	0.69691	-28.9065
Cima-3_tmte 1	0.17	26.4167	2.1064	15.6263	0.6138	0.0781	51.4878	0.7702	2.1462	0.1326	99.548		Cima-4a_tmte12	Cima-4a_ilm30	964.618	-1.45797	-0.697968	0.630919	0.573003	-28.4047
Cima-3_tmte 2	0.092	26.4028	2.0399	15.5797	0.565	-0.0365	51.7213	0.8204	1.8678	0.1043	99.1569		Cima-4a_tmte46	Cima-4a_ilm29	964.504	-1.65052	-0.890525	0.795248	0.73707	-28.8523
Cima-3_tmte 3	0.0756	25.7367	1.9761	16.9889	0.5994	0.0701	50.975	0.7289	2.0758	0.0822	99.3089		Cima-4a_tmte42	Cima-4a_ilm14	963.878	-1.70512	-0.94512	0.738099	0.609895	-29.001
Cima-3_tmte 4	0.0604	26.0959	1.8995	15.8462	0.6917	0.0676	51.6823	0.8124	1.7556	0.0556	98.9672		Cima-4a_tmte9	Cima-4a_ilm29	963.01	-1.61496	-0.854961	0.795248	0.613765	-28.8252
Cima-3_tmte 6	0.0687	26.5511	1.9084	15.4191	0.6058	0.1302	50.3798	0.7423	2.6797	0.1273	98.6124		Cima-4a_tmte32	Cima-4a_ilm29	962.109	-1.58367	-0.823667	0.795248	0.670596	-28.7863
Cima-3_tmte 8	0.1277	24.3622	1.9622	19.3332	0.5354	0.0303	49.1056	0.7225	1.5535	0.366	98.0986		Cima-4a_tmte2	Cima-4a_ilm29	961.295	-1.68335	-0.92335	0.795248	0.706156	-29.0459
Cima-3_tmte 9	0.0848	26.1019	2.3913	15.752	0.7071	0.4094	50.8636	0.6968	2.2952	0.1563	99.4585		Cima-4a_tmte20	Cima-4a_ilm14	960.058	-1.73917	-0.979167	0.738099	0.640196	-29.22
Cima-3_tmte 10	0.1616	26.3885	2.4638	14.9126	0.7946	0.3685	51.3121	0.7588	2.344	0.1167	99.6211		Cima-4a_tmte22	Cima-4a_ilm29	959.43	-1.63818	-0.878185	0.795248	0.671004	-29.0107
Cima-3_tmte 11	-0.0596	25.5518	2.2646	17.5517	0.6368	0.2979	50.3647	0.7209	2.0435	0.1997	99.572		Cima-4a_tmte19	Cima-4a_ilm14	958.322	-1.76654	-1.00654	0.738099	0.620861	-29.3473
Cima-3_tmte 12	0.0612	26.5089	1.9726	15.6425	0.6441	0.0306	51.9894	0.8212	1.9154	0.068	99.6537		Cima-4a_tmte25	Cima-4a_ilm29	957.01	-1.59454	-0.834543	0.795248	0.683157	-28.9998
Cima-3_tmte 14	0.0947	26.7252	2.1721	14.9035	0.6579	0.1683	51.4001	0.7902	2.2334	0.1466	99.2921		Cima-4a_tmte38	Cima-4a_ilm29	956.481	-1.57028	-0.81028	0.795248	0.720089	-28.9636
Cima-3_tmte 17	0.1284	25.5186	1.8656	17.3331	0.4564	0.0139	50.4642	0.7555	2.0734	0.122	98.731		Cima-4a_tmte5	Cima-4a_ilm29	953.475	-1.58004	-0.820038	0.795248	0.718889	-29.098
Cima-3_tmte 18	0.0569	26.0793	2.5079	15.2915	0.7374	1.3261	50.3544	0.7633	2.7571	0.1239	99.9977		Cima-4a_tmte3	Cima-4a_ilm14	950.309	-1.74392	-0.983924	0.738099	0.557318	-29.5939
Cima-3_tmte 19	0.0434	25.8171	1.9927	16.8544	0.5607	0.0303	51.1344	0.7712	1.9804	0.0723	99.2569		Cima-4a_tmte14	Cima-4a_ilm14	949.85	-1.77952	-1.01952	0.738099	0.680007	-29.6932
Cima-3_tmte 20	0.0541	25.493	1.5916	16.7881	0.4883	0.003	52.1956	0.8689	0.7999	0.0775	98.36		Cima-4a_tmte16	Cima-4a_ilm14	947.18	-1.71499	-0.954991	0.738099	0.580066	-29.6451
Cima-3_tmte 22	0.0725	26.7242	1.1757	15.1916	0.7381	0.0495	53.5048	0.7302	0.9569	0.0659	99.2095		Cima-4a_tmte28	Cima-4a_ilm14	947.146	-1.81381	-1.05381	0.738099	0.571193	-29.8739
Cima-3_tmte 23	0.0867	27.3851	2.2991	13.4267	0.6034	0.0708	52.4657	0.718	2.0654	0.113	99.2339		Cima-4a_tmte21	Cima-4a_ilm29	946.611	-1.63616	-0.87616	0.795248	0.725607	-29.485
Cima-3_tmte 26	0.0389	26.2937	2.0241	15.6748	0.6278	0.129	49.925	0.7771	2.5187	0.2012	98.2103		Cima-4a_tmte12	Cima-4a_ilm29	945.577	-1.63382	-0.87382	0.795248	0.573003	-29.5187
Cima-3_tmte 27	0.0481	26.6564	2.0224	15.3064	0.5356	0.0718	51.5538	0.8079	2.1571	0.0882	99.2477		Cima-4a_tmte9	Cima-4a_ilm14	943.265	-1.74984	-0.989835	0.738099	0.613765	-29.8735
Cima-3_tmte 28	0.0777	26.557	1.5982	15.7235	0.6532	0.1039	50.8587	0.7821	2.3903	0.119	98.8635		Cima-4a_tmte32	Cima-4a_ilm14	942.357	-1.71883	-0.958833	0.738099	0.670596	-29.8366
Cima-3_tmte 29	0.1191	26.3628	1.7346	16.202	0.4543	0.0406	51.2715	0.8043	1.8358	0.2144	99.0394		Cima-4a_tmte7	Cima-4a_ilm29	940.812	-1.62878	-0.868779	0.795248	0.65326	-29.688
Cima-3_tmte 30	0.0725	26.3833	1.7832	16.5164	0.4929	0.0001	50.9875	0.7773	2.2698	0.1438	99.427		Cima-4a_tmte11	Cima-4a_ilm29	940.611	-1.66742	-0.907418	0.795248	0.672497	-29.7847
Cima-3_tmte 31	0.036	26.4577	1.9308	16.2219	0.5245	0.0068	50.8763	0.8265	2.5782	0.0556	99.5143		Cima-4a_tmte22	Cima-4a_ilm14	939.82	-1.77307	-1.01307	0.738099	0.671004	-30.0582
Cima-3_tmte 33	0.1789	26.5143	1.9587	14.9811	0.7089	0.1443	51.4199	0.7487	2.2513	0.09	98.9961		Cima-4a_tmte25	Cima-4a_ilm14	937.321	-1.72993	-0.96993	0.738099	0.683157	-30.0545
Cima-3_tmte 35	0.0652	26.5421	1.4937	15.5123	0.5075	0.0131	52.2552	0.782	1.5038	0.0889	98.7637		Cima-4a_tmte40	Cima-4a_ilm29	934.581	-1.61148	-0.851475	0.795248	0.696905	-29.887
Cima-3_tmte 36	0.0006	26.3547	1.6361	16.1316	0.6328	0.1709	50.9621	0.716	2.413	0.0423	99.0599		Cima-4a_tmte27	Cima-4a_ilm29	930.94	-1.66364	-0.903645	0.795248	0.678606	-30.1479
Cima-3_tmte 37	0.0209	26.3616	1.6799	16.3076	0.5236	0.0219	51.3342	0.752	1.7828	0.1912	98.9758		Cima-4a_tmte12	Cima-4a_ilm14	926.339	-1.76915	-1.00915	0.738099	0.573003	-30.5699
Cima-3_tmte 38	0.1319	27.1542	1.2907	14.0274	0.6173	0.0233	53.4728	0.8034	1.1286	0.0765	98.7262		Cima-4a_tmte7	Cima-4a_ilm14	921.758	-1.76423	-1.00423	0.738099	0.65326	-30.7382
Cima-3_tmte 39	0.1008	25.6486	1.8147	17.0457	0.3789	0.0298	51.6618	0.9394	1.3515	0.0978	99.0692		Cima-4a_tmte11	Cima-4a_ilm14	921.593	-1.80263	-1.04263	0.738099	0.672497	-30.8332
Cima-3_tmte 40	0.1015	26.4788	1.8948	15.6517	0.4872	0.0086	51.0027	0.8022	2.3053	0.1103	98.8432		Cima-4a_tmte27	Cima-4a_ilm14	912.041	-1.79935	-1.03935	0.738099	0.678606	-31.2049
Cima-3_tmte 42	0.0794	25.9271	2.1652	16.4706	0.7464	0.2028	51.2317	0.7623	2.0223	0.1192	99.7269		Cima-4a_tmte31	Cima-4a_ilm38	838.165	-2.56027	-1.80027	0.674789	0.608096	-36.1134
Cima-3_tmte 43	0.0926	26.0097	1.9936	15.4819	0.6969	0.6836	50.5681	0.6815	2.28	0.1395	98.6274		Cima-4a_tmte42	Cima-4a_ilm38	836.53	-2.51223	-1.75223	0.674789	0.609895	-36.0774
Cima-3_tmte 44	0.0711	26.4003	2.2648	14.5753	0.6495	0.7543	50.6012	0.6634	2.4631	0.1598	98.6028		Cima-4a_tmte19	Cima-4a_ilm38	832.205	-2.5719	-1.8119	0.674789	0.620861	-36.4134
Cima-3_tmte 45	0.1656	26.4829	2.3783	14.4317	0.7033	0.3957	51.0143	0.7016	2.5151	0.1016	98.89		Cima-4a_tmte13	Cima-4a_ilm38	830.988	-2.53097	-1.77097	0.674789	0.472616	-36.3753
Cima-3_tmte 46	0.0795	26.4678	1.5938	14.9359	0.7158	0.1889	53.2242	0.7461	1.1012	0.0264	99.0795		Cima-4a_tmte3	Cima-4a_ilm38	825.259	-2.55228	-1.79228	0.674789	0.557318	-36.6904
Cima-3_tmte 47	0.0952	26.4445	2.1914	15.0421	0.7009	0.3027	52.1881	0.7437	1.9119	0.0468	99.6674		Cima-4a_tmte28	Cima-4a_ilm38	823.84	-2.61824	-1.85824	0.674789	0.571193	-36.9087
Cima-3_tmte 48	0.0842	25.8708	1.3869	16.6205	0.5477	0.0026	51.3161	0.7601	1.7022	0.0661	98.3571		Cima-4a_tmte16	Cima-4a_ilm38	823.139	-2.52435	-1.76435	0.674789	0.580066	-36.7253
													Cima-4a_tmte9	Cima-4a_ilm38	819.667	-2.55848	-1.79848	0.674789	0.613765	-36.9671
Comment	SiO2	TiO2	Al2O3	Fe2O3	V2O3	Cr2O3	FeO	MnO	MgO	CaO	adjusted total		Cima-4a_tmte12	Cima-4a_ilm38	806.203	-2.57968	-1.81968	0.674789	0.573003	-37.6591
Cima4a_ilm14	0.0889	50.3686	0.2667	7.45216	0.386	0.0019	37.514	0.8294	2.5782	0.1735	99.6594
Cima4a_ilm18	0.1127	48.9228	0.2484	8.13871	0.3536	0.0065	37.9428	0.7879	1.765	0.1434	98.4218		Cima-5_tmte10	Cima-5_ilm2	971.726	-1.60228	-0.842275	0.803408	0.723935	-28.4779
Cima4a_ilm23	0.1453	49.0388	0.0844	7.63276	0.3277	0.0004	39.0987	0.8201	1.6011	0.155	98.9043		Cima-5_tmte4	Cima-5_ilm2	961.315	-1.63286	-0.872855	0.803408	0.717578	-28.9288
Cima4a_ilm25	0.143	50.0702	0.3505	8.58413	0.4248	0.0188	37.263	0.7786	2.3818	0.1602	100.175		Cima-5_tmte39	Cima-5_ilm2	940.763	-1.63203	-0.872027	0.803408	0.724892	-29.6974
[truncated: 184 more rows]

## Sheet: Table S6
Table S.6a. PLAGIOCLASE PHENOCRYST ANALYSES FOR THREE CIMA HAWAIITES.													Table S.6b. ANALYSIS OF MOST CALCIC PLAGIOCLASE PHENOCRYST.
[truncated: 1,057 more rows]

[truncated: 1 more sheets: Table S7]
